# Supplementary material for: Highly heterozygous Citrus changshan-huyou Y. B. Chang originated from ancient hybridization between mandarin and pummelo and displayed distinct tissue-specific allelic imbalance
Source: Research Square preprint supplement (doi:10.21203/rs.3.rs-6552063/v1), 2025-05-15
Supplement: Supplementary file 1 [file c601386dcb55176dfd934704.xlsx]

## Sheet: S0
Supplementary File S0. TE annotation for HY1 and HY2. TE annotations were performed using EarlGrey pipeline.
Summary of TE contents in HY1 genome
Summary of TE contents in HY2 genome

## Sheet: S1
Supplementary file S1. k-mer tracing results of HY1 and HY2. The outputs were generated using the kpart tool at https://github.com/sc-zhang/kPart.
ContigName	Order	Positions	No. of kmers	No. of shared kmers	No. of kmers that are present only in citron	No. of kmers that are present only in pummelo	No. of kmers that are present only in mandarin	Classification
H1chr1	1	0-100000	151136	90550	466	552	47856	mandarin
H1chr1	2	100000-200000	162198	80354	4122	3350	42876	mandarin
H1chr1	3	200000-300000	199416	134156	2962	3314	35350	mandarin
H1chr1	4	300000-400000	198598	119972	604	1298	60314	mandarin
H1chr1	5	400000-500000	191180	101430	2488	3232	52542	mandarin
H1chr1	6	500000-600000	198046	119040	1920	1088	57652	mandarin
H1chr1	7	600000-700000	192844	115820	1458	1674	51428	mandarin
H1chr1	8	700000-800000	190504	87058	1060	1238	80804	mandarin
H1chr1	9	800000-900000	195268	112706	1838	2492	41758	mandarin
H1chr1	10	900000-1000000	194708	106930	1582	3342	58300	mandarin
H1chr1	11	1000000-1100000	189722	119206	3332	3408	36156	mandarin
H1chr1	12	1100000-1200000	198412	117082	2366	2006	50108	mandarin
H1chr1	13	1200000-1300000	175918	61344	9240	7364	27470	mandarin
H1chr1	14	1300000-1400000	196304	106326	1704	1528	66234	mandarin
H1chr1	15	1400000-1500000	182620	97754	788	984	67058	mandarin
H1chr1	16	1500000-1600000	191118	106510	3922	1220	59312	mandarin
H1chr1	17	1600000-1700000	193852	107696	1038	1800	63918	mandarin
H1chr1	18	1700000-1800000	185040	74836	1268	2106	77420	mandarin
H1chr1	19	1800000-1900000	188836	94390	922	1316	63680	mandarin
H1chr1	20	1900000-2000000	197260	89764	2886	3308	63404	mandarin
H1chr1	21	2000000-2100000	197282	110534	2768	3302	51474	mandarin
H1chr1	22	2100000-2200000	198266	126976	1224	2158	45784	mandarin
H1chr1	23	2200000-2300000	191814	73174	10662	7304	29728	mandarin
H1chr1	24	2300000-2400000	195204	75540	7508	5578	35286	mandarin
H1chr1	25	2400000-2500000	175344	101126	2448	2952	44738	mandarin
H1chr1	26	2500000-2600000	181316	101204	1934	4374	44304	mandarin
H1chr1	27	2600000-2700000	192460	126984	494	544	55324	mandarin
H1chr1	28	2700000-2800000	194358	125992	770	714	55698	mandarin
H1chr1	29	2800000-2900000	196664	116590	1016	1938	56314	mandarin
H1chr1	30	2900000-3000000	198160	92270	996	2930	77804	mandarin
H1chr1	31	3000000-3100000	185616	108536	1838	2744	45208	mandarin
H1chr1	32	3100000-3200000	187190	98764	268	552	79536	mandarin
H1chr1	33	3200000-3300000	199222	133488	572	520	53636	mandarin
H1chr1	34	3300000-3400000	197052	76616	1630	1404	74020	mandarin
H1chr1	35	3400000-3500000	175862	60720	1642	990	77252	mandarin
H1chr1	36	3500000-3600000	189184	102356	2010	1744	53646	mandarin
H1chr1	37	3600000-3700000	198666	118534	772	1838	60208	mandarin
H1chr1	38	3700000-3800000	197396	118520	1008	756	61738	mandarin
H1chr1	39	3800000-3900000	198594	122680	1268	1334	53884	mandarin
H1chr1	40	3900000-4000000	195286	104402	2688	1842	55794	mandarin
H1chr1	41	4000000-4100000	197850	117802	2944	2330	54106	mandarin
H1chr1	42	4100000-4200000	192176	98482	7790	5636	33454	mandarin
H1chr1	43	4200000-4300000	194372	66356	2482	3536	83244	mandarin
H1chr1	44	4300000-4400000	194048	103386	1836	2632	56986	mandarin
H1chr1	45	4400000-4500000	188138	73748	11832	5630	47016	mandarin
H1chr1	46	4500000-4600000	198464	111698	2438	2568	55276	mandarin
H1chr1	47	4600000-4700000	161048	84710	3510	2590	41090	mandarin
H1chr1	48	4700000-4800000	198420	119346	2940	2360	51266	mandarin
H1chr1	49	4800000-4900000	195176	105182	2392	2076	60570	mandarin
H1chr1	50	4900000-5000000	197736	127254	3188	1520	44426	mandarin
H1chr1	51	5000000-5100000	187946	80434	5382	10822	42142	mandarin
H1chr1	52	5100000-5200000	183502	93508	2984	3350	45840	mandarin
H1chr1	53	5200000-5300000	197350	105164	7846	12312	23100	Undetermined
H1chr1	54	5300000-5400000	193334	84130	2188	1496	78768	mandarin
H1chr1	55	5400000-5500000	187944	97492	4624	8282	36598	mandarin
H1chr1	56	5500000-5600000	194904	110658	802	2714	43638	mandarin
H1chr1	57	5600000-5700000	197664	99586	1832	3976	55944	mandarin
H1chr1	58	5700000-5800000	194274	55734	9438	3362	70790	mandarin
H1chr1	59	5800000-5900000	197794	52706	13920	2786	78076	mandarin
H1chr1	60	5900000-6000000	192630	106930	2466	1338	47470	mandarin
H1chr1	61	6000000-6100000	197218	116314	2418	1738	57120	mandarin
H1chr1	62	6100000-6200000	185880	92960	1340	966	74748	mandarin
H1chr1	63	6200000-6300000	74292	28334	1100	602	28950	mandarin
H1chr1	64	6300000-6400000	187736	115474	312	190	56856	mandarin
H1chr1	65	6400000-6500000	191324	116758	640	488	57920	mandarin
H1chr1	66	6500000-6600000	167810	70978	194	1696	80296	mandarin
H1chr1	67	6600000-6700000	144373	81396	1526	554	46540	mandarin
H1chr1	68	6700000-6800000	198550	133776	2008	2334	44134	mandarin
H1chr1	69	6800000-6900000	193966	56114	1318	786	123134	mandarin
H1chr1	70	6900000-7000000	194950	72426	7230	4530	57168	mandarin
H1chr1	71	7000000-7100000	197224	121026	3702	4952	33866	mandarin
H1chr1	72	7100000-7200000	198590	116120	1430	2072	60682	mandarin
H1chr1	73	7200000-7300000	196020	120422	2922	2874	47610	mandarin
H1chr1	74	7300000-7400000	196232	114706	1582	1656	59470	mandarin
H1chr1	75	7400000-7500000	196256	90524	1280	1810	79174	mandarin
H1chr1	76	7500000-7600000	198084	96824	2244	4542	46898	mandarin
H1chr1	77	7600000-7700000	185324	120072	1068	1094	50212	mandarin
H1chr1	78	7700000-7800000	192386	107536	1306	840	68478	mandarin
H1chr1	79	7800000-7900000	189752	105770	4972	5044	29976	mandarin
H1chr1	80	7900000-8000000	179066	68178	7962	4002	45638	mandarin
H1chr1	81	8000000-8100000	196966	115722	1488	1362	56792	mandarin
H1chr1	82	8100000-8200000	196814	131082	446	606	54282	mandarin
H1chr1	83	8200000-8300000	198336	108514	558	514	77372	mandarin
H1chr1	84	8300000-8400000	182688	100832	1418	1366	65968	mandarin
H1chr1	85	8400000-8500000	191638	111502	734	820	67890	mandarin
H1chr1	86	8500000-8600000	190014	93410	880	1876	82784	mandarin
H1chr1	87	8600000-8700000	145086	61622	596	510	67934	mandarin
H1chr1	88	8700000-8800000	153746	53602	3116	1604	62588	mandarin
H1chr1	89	8800000-8900000	183814	91100	750	664	80424	mandarin
H1chr1	90	8900000-9000000	185032	76480	968	936	95526	mandarin
H1chr1	91	9000000-9100000	183674	84810	950	1044	85792	mandarin
H1chr1	92	9100000-9200000	185450	106008	834	898	66860	mandarin
H1chr1	93	9200000-9300000	187676	100412	1718	1270	68608	mandarin
H1chr1	94	9300000-9400000	188086	115146	1056	760	60730	mandarin
H1chr1	95	9400000-9500000	193366	96880	1588	824	81910	mandarin
H1chr1	96	9500000-9600000	182550	92144	1264	594	76660	mandarin
H1chr1	97	9600000-9700000	183782	67272	820	796	101588	mandarin
H1chr1	98	9700000-9800000	173948	91392	1194	966	67562	mandarin
H1chr1	99	9800000-9900000	180908	87976	1442	1100	76718	mandarin
H1chr1	100	9900000-10000000	196822	106542	1050	704	71576	mandarin
H1chr1	101	10000000-10100000	193180	98428	2580	1858	60096	mandarin
H1chr1	102	10100000-10200000	196206	90026	1398	890	76158	mandarin
H1chr1	103	10200000-10300000	180402	101138	1272	1266	62474	mandarin
H1chr1	104	10300000-10400000	196502	113362	1656	2530	53966	mandarin
H1chr1	105	10400000-10500000	193484	89074	1620	1408	75936	mandarin
H1chr1	106	10500000-10600000	197542	109988	656	672	73360	mandarin
H1chr1	107	10600000-10700000	151556	67140	4118	5956	42344	mandarin
H1chr1	108	10700000-10800000	191956	113878	2334	4800	37350	mandarin
H1chr1	109	10800000-10900000	197804	121696	2298	2634	47326	mandarin
H1chr1	110	10900000-11000000	183524	122996	1984	3344	31976	mandarin
H1chr1	111	11000000-11100000	196332	119328	558	878	66386	mandarin
H1chr1	112	11100000-11200000	171924	73310	594	1268	79084	mandarin
H1chr1	113	11200000-11300000	182942	98018	2610	2450	52504	mandarin
H1chr1	114	11300000-11400000	156600	76978	4276	2260	24176	mandarin
H1chr1	115	11400000-11500000	193562	59114	40176	9622	15332	citron
H1chr1	116	11500000-11600000	189250	46594	1118	1846	110550	mandarin
H1chr1	117	11600000-11700000	195840	96148	1050	582	82798	mandarin
H1chr1	118	11700000-11800000	194884	82740	1924	2072	81318	mandarin
H1chr1	119	11800000-11900000	199414	105086	2468	2704	58804	mandarin
H1chr1	120	11900000-12000000	190120	102412	1528	1770	63190	mandarin
H1chr1	121	12000000-12100000	193176	118342	2640	1966	37044	mandarin
H1chr1	122	12100000-12200000	197182	113422	8042	3728	35604	mandarin
H1chr1	123	12200000-12300000	193174	23494	12130	8412	4638	Undetermined
H1chr1	124	12300000-12400000	187184	37418	5656	7832	12754	Undetermined
H1chr1	125	12400000-12500000	192722	57498	7996	8948	14242	Undetermined
H1chr1	126	12500000-12600000	182388	60578	9684	10022	22830	mandarin
H1chr1	127	12600000-12700000	155800	52356	9612	10754	9782	Undetermined
H1chr1	128	12700000-12800000	183840	67126	8556	8876	20406	mandarin
H1chr1	129	12800000-12900000	194158	49204	9670	8630	20034	mandarin
H1chr1	130	12900000-13000000	197574	56072	5862	5524	58176	mandarin
H1chr1	131	13000000-13100000	193342	44010	4220	5096	71102	mandarin
H1chr1	132	13100000-13200000	192762	63488	2624	3462	84482	mandarin
H1chr1	133	13200000-13300000	193132	69862	536	276	108810	mandarin
H1chr1	134	13300000-13400000	197494	109802	812	792	74626	mandarin
H1chr1	135	13400000-13500000	195610	90782	2356	2816	60326	mandarin
H1chr1	136	13500000-13600000	175846	97414	3418	1898	43826	mandarin
H1chr1	137	13600000-13700000	197486	102728	1952	3216	55770	mandarin
H1chr1	138	13700000-13800000	197516	119944	680	1486	59286	mandarin
H1chr1	139	13800000-13900000	195978	86016	2218	1156	82156	mandarin
H1chr1	140	13900000-14000000	194776	100624	6602	3372	38022	mandarin
H1chr1	141	14000000-14100000	194920	120732	888	1340	56878	mandarin
H1chr1	142	14100000-14200000	198828	111978	3728	5856	41296	mandarin
H1chr1	143	14200000-14300000	195296	102994	2102	3006	55132	mandarin
H1chr1	144	14300000-14400000	195904	120032	3358	5302	33828	mandarin
H1chr1	145	14400000-14500000	195144	106336	1838	2260	65860	mandarin
H1chr1	146	14500000-14600000	198430	135474	1398	1662	40874	mandarin
H1chr1	147	14600000-14700000	190404	110830	900	1550	61950	mandarin
H1chr1	148	14700000-14800000	196362	123352	2222	3736	34190	mandarin
H1chr1	149	14800000-14900000	191208	90366	11474	4840	15712	Undetermined
H1chr1	150	14900000-15000000	195408	107182	3752	2640	59100	mandarin
H1chr1	151	15000000-15100000	196978	117120	2720	2814	45502	mandarin
H1chr1	152	15100000-15200000	197052	122506	1684	2798	46948	mandarin
H1chr1	153	15200000-15300000	169836	87064	14792	2726	27036	Undetermined
H1chr1	154	15300000-15400000	199316	116660	1468	1678	61510	mandarin
H1chr1	155	15400000-15500000	175714	88692	1956	1868	63032	mandarin
H1chr1	156	15500000-15600000	190656	98572	1930	3702	45294	mandarin
H1chr1	157	15600000-15700000	175038	76546	2668	3408	47292	mandarin
H1chr1	158	15700000-15800000	192002	107286	3340	11472	43496	mandarin
H1chr1	159	15800000-15900000	196378	117640	2638	11164	46356	mandarin
H1chr1	160	15900000-16000000	197096	127928	1838	2604	44240	mandarin
H1chr1	161	16000000-16100000	198002	114554	2066	1858	60806	mandarin
H1chr1	162	16100000-16200000	192632	91278	1318	1874	75804	mandarin
H1chr1	163	16200000-16300000	171872	102950	1294	2748	42724	mandarin
H1chr1	164	16300000-16400000	179806	89030	1786	1238	75444	mandarin
H1chr1	165	16400000-16500000	189204	62160	0	2	117100	mandarin
H1chr1	166	16500000-16600000	198864	107144	1766	7198	35208	mandarin
H1chr1	167	16600000-16700000	192528	107470	2952	2406	59188	mandarin
H1chr1	168	16700000-16800000	177538	88388	4154	6254	20394	mandarin
H1chr1	169	16800000-16900000	172340	89992	1386	2048	56320	mandarin
H1chr1	170	16900000-17000000	152256	74440	3776	2506	40250	mandarin
H1chr1	171	17000000-17100000	158684	72344	5398	5594	17224	mandarin
H1chr1	172	17100000-17200000	170790	94384	2546	2240	42498	mandarin
H1chr1	173	17200000-17300000	191536	129802	2662	5484	33622	mandarin
H1chr1	174	17300000-17400000	189088	105852	746	2564	66330	mandarin
H1chr1	175	17400000-17500000	169656	103350	4010	4154	28552	mandarin
H1chr1	176	17500000-17600000	193368	90042	11898	19296	13712	Undetermined
H1chr1	177	17600000-17700000	184008	118874	4162	4300	30502	mandarin
H1chr1	178	17700000-17800000	195012	91474	750	1120	69912	mandarin
H1chr1	179	17800000-17900000	191050	108566	2190	1380	54848	mandarin
H1chr1	180	17900000-18000000	198584	113752	2800	5686	49076	mandarin
H1chr1	181	18000000-18100000	198062	110456	2966	2262	56578	mandarin
H1chr1	182	18100000-18200000	185166	99794	4222	8148	33474	mandarin
H1chr1	183	18200000-18300000	193430	87040	3316	8550	43426	mandarin
H1chr1	184	18300000-18400000	199546	119334	2870	3536	41682	mandarin
H1chr1	185	18400000-18500000	197584	120266	2536	2180	50028	mandarin
H1chr1	186	18500000-18600000	184404	86324	1458	1780	75082	mandarin
H1chr1	187	18600000-18700000	172804	92832	2274	2786	44114	mandarin
H1chr1	188	18700000-18800000	195574	108682	2390	7110	39082	mandarin
H1chr1	189	18800000-18900000	192270	115376	2498	2214	46706	mandarin
H1chr1	190	18900000-19000000	191748	127132	662	848	45150	mandarin
H1chr1	191	19000000-19100000	193930	132074	318	442	54680	mandarin
H1chr1	192	19100000-19200000	180826	86918	1144	2970	67908	mandarin
H1chr1	193	19200000-19300000	199264	131516	1252	1774	49848	mandarin
H1chr1	194	19300000-19400000	194234	119918	2130	2390	51148	mandarin
H1chr1	195	19400000-19500000	170666	85122	4048	18180	22460	Undetermined
H1chr1	196	19500000-19600000	162176	84880	7972	6990	15702	Undetermined
H1chr1	197	19600000-19700000	165920	77922	8868	8806	18672	mandarin
H1chr1	198	19700000-19800000	196796	111804	4174	3826	45940	mandarin
H1chr1	199	19800000-19900000	193584	106934	3238	1834	59058	mandarin
H1chr1	200	19900000-20000000	184974	84898	1326	1736	79684	mandarin
H1chr1	201	20000000-20100000	193694	117510	1340	2534	51310	mandarin
H1chr1	202	20100000-20200000	195488	123966	1710	2012	48364	mandarin
H1chr1	203	20200000-20300000	193780	106052	2340	5766	43822	mandarin
H1chr1	204	20300000-20400000	193458	118112	3096	8336	39094	mandarin
H1chr1	205	20400000-20500000	192550	119420	1514	1622	49382	mandarin
H1chr1	206	20500000-20600000	198628	134018	2638	2678	38460	mandarin
H1chr1	207	20600000-20700000	198944	133628	886	1112	42684	mandarin
H1chr1	208	20700000-20800000	199390	132076	944	1042	47172	mandarin
H1chr1	209	20800000-20900000	199550	133144	2406	2928	37854	mandarin
H1chr1	210	20900000-21000000	198520	144054	658	836	41902	mandarin
H1chr1	211	21000000-21100000	190696	110730	3574	1752	50904	mandarin
H1chr1	212	21100000-21200000	184494	99190	1896	1364	58706	mandarin
H1chr1	213	21200000-21300000	183048	92492	2988	3720	35124	mandarin
H1chr1	214	21300000-21400000	196222	112348	1386	2634	54916	mandarin
H1chr1	215	21400000-21500000	197834	119886	1634	1852	53302	mandarin
H1chr1	216	21500000-21600000	192148	114416	1294	2864	48712	mandarin
H1chr1	217	21600000-21700000	195808	116280	1112	1902	45620	mandarin
H1chr1	218	21700000-21800000	196834	91508	6094	13656	28872	mandarin
H1chr1	219	21800000-21900000	196358	130982	2152	2484	31488	mandarin
H1chr1	220	21900000-22000000	196860	121600	1036	3012	48224	mandarin
H1chr1	221	22000000-22100000	190758	116262	988	3670	37624	mandarin
H1chr1	222	22100000-22200000	199232	136562	1844	3430	38980	mandarin
H1chr1	223	22200000-22300000	198906	143328	836	1178	40028	mandarin
H1chr1	224	22300000-22400000	199010	147420	1270	1514	33180	mandarin
H1chr1	225	22400000-22500000	197840	124954	2584	1264	46646	mandarin
H1chr1	226	22500000-22600000	198826	129246	1984	2804	39518	mandarin
H1chr1	227	22600000-22700000	199138	133638	1378	2544	40584	mandarin
H1chr1	228	22700000-22800000	189582	116308	1488	3378	41442	mandarin
H1chr1	229	22800000-22900000	162102	99490	1826	2572	39536	mandarin
H1chr1	230	22900000-23000000	193126	141940	722	686	38770	mandarin
H1chr1	231	23000000-23100000	191192	124598	992	2280	43416	mandarin
H1chr1	232	23100000-23200000	199156	132468	2194	2562	38606	mandarin
H1chr1	233	23200000-23300000	190676	129134	912	1804	42554	mandarin
H1chr1	234	23300000-23400000	188464	103652	2250	4312	40444	mandarin
H1chr1	235	23400000-23500000	198916	122604	1436	1432	53824	mandarin
H1chr1	236	23500000-23600000	198056	133890	1508	2524	39662	mandarin
H1chr1	237	23600000-23700000	199626	104524	1198	1464	38270	mandarin
H1chr1	238	23700000-23800000	197012	115462	1476	3238	44160	mandarin
H1chr1	239	23800000-23900000	198640	131588	1424	2638	42496	mandarin
H1chr1	240	23900000-24000000	198988	129454	3218	1720	38440	mandarin
H1chr1	241	24000000-24100000	198566	134720	788	672	48004	mandarin
H1chr1	242	24100000-24200000	198256	121668	832	1016	59482	mandarin
H1chr1	243	24200000-24300000	197684	135876	1188	1664	39542	mandarin
H1chr1	244	24300000-24400000	199726	133978	1122	1420	44788	mandarin
H1chr1	245	24400000-24500000	199194	131714	1816	2100	44024	mandarin
H1chr1	246	24500000-24600000	198274	120716	1720	3752	46716	mandarin
H1chr1	247	24600000-24700000	198884	144380	1218	2206	34208	mandarin
H1chr1	248	24700000-24800000	199324	124466	1054	1452	51412	mandarin
H1chr1	249	24800000-24900000	199612	141852	1086	1450	39724	mandarin
H1chr1	250	24900000-25000000	199168	129896	1370	2124	45990	mandarin
H1chr1	251	25000000-25100000	199014	120118	1596	2008	51568	mandarin
H1chr1	252	25100000-25200000	199292	138056	876	1258	42594	mandarin
H1chr1	253	25200000-25300000	193008	133284	836	1464	41966	mandarin
H1chr1	254	25300000-25400000	199096	125968	1402	4366	45076	mandarin
H1chr1	255	25400000-25500000	198792	129000	1624	1768	48616	mandarin
H1chr1	256	25500000-25600000	199586	137806	584	888	45304	mandarin
H1chr1	257	25600000-25700000	199192	132628	406	892	48940	mandarin
H1chr1	258	25700000-25800000	167962	94412	386	452	34064	mandarin
H1chr1	259	25800000-25900000	198596	127124	710	1384	54448	mandarin
H1chr1	260	25900000-26000000	197742	123270	1328	2116	52576	mandarin
H1chr1	261	26000000-26100000	197790	140384	1096	1538	38682	mandarin
H1chr1	262	26100000-26200000	199316	131770	1096	1590	48948	mandarin
H1chr1	263	26200000-26300000	138378	70766	1054	1606	28424	mandarin
H1chr1	264	26300000-26400000	115272	26246	1828	3630	31466	mandarin
H1chr1	265	26400000-26500000	148406	54176	2536	3302	44794	mandarin
H1chr1	266	26500000-26600000	199510	134528	902	1310	49828	mandarin
H1chr1	267	26600000-26700000	199516	138568	1114	1030	45116	mandarin
H1chr1	268	26700000-26800000	198668	129358	1022	2162	46834	mandarin
H1chr1	269	26800000-26900000	199448	127638	1020	2868	44822	mandarin
H1chr1	270	26900000-27000000	199396	134996	1280	2014	44504	mandarin
H1chr1	271	27000000-27100000	199656	145302	914	1792	36236	mandarin
H1chr1	272	27100000-27200000	198712	129662	864	1322	52838	mandarin
H1chr1	273	27200000-27300000	197672	126680	1004	1240	47592	mandarin
H1chr1	274	27300000-27400000	199436	129528	1694	2310	45394	mandarin
H1chr1	275	27400000-27500000	199260	119924	1458	2206	52218	mandarin
H1chr1	276	27500000-27600000	199312	126444	3786	2692	43976	mandarin
H1chr1	277	27600000-27700000	198504	132904	1174	2246	43226	mandarin
H1chr1	278	27700000-27800000	199378	134180	1356	1844	44138	mandarin
H1chr1	279	27800000-27900000	199616	135950	668	796	50388	mandarin
H1chr1	280	27900000-28000000	199584	130200	2224	2134	43306	mandarin
H1chr1	281	28000000-28100000	195176	82118	4070	4632	19910	mandarin
H1chr1	282	28100000-28200000	193806	29286	7164	4800	10148	Undetermined
H1chr1	283	28200000-28300000	198814	92426	3858	4728	31562	mandarin
H1chr1	284	28300000-28400000	199228	141172	922	1156	40514	mandarin
H1chr1	285	28400000-28500000	199350	137692	918	1276	45978	mandarin
H1chr1	286	28500000-28600000	199296	122614	1562	2362	40004	mandarin
H1chr1	287	28600000-28700000	199600	139882	634	846	45118	mandarin
H1chr1	288	28700000-28800000	198180	139174	990	1520	40102	mandarin
H1chr1	289	28800000-28900000	189102	119220	1358	1698	42752	mandarin
H1chr1	290	28900000-29000000	199260	141110	1032	1568	40716	mandarin
H1chr1	291	29000000-29100000	199256	141446	616	788	47006	mandarin
H1chr1	292	29100000-29200000	199358	145050	1682	1446	36774	mandarin
H1chr1	293	29200000-29230096	21380	5290	272	1776	2468	Undetermined
H1chr2	294	0-100000	134424	74178	9196	2504	16190	Undetermined
H1chr2	295	100000-200000	196096	120690	2926	4356	30800	mandarin
H1chr2	296	200000-300000	199540	151894	956	1242	32076	mandarin
H1chr2	297	300000-400000	199442	124234	1876	2550	50046	mandarin
H1chr2	298	400000-500000	199456	137152	646	1096	47278	mandarin
H1chr2	299	500000-600000	195888	126616	670	1510	53072	mandarin
H1chr2	300	600000-700000	199654	132040	2030	2364	43726	mandarin
H1chr2	301	700000-800000	197828	130790	1208	1680	44150	mandarin
H1chr2	302	800000-900000	197792	120658	846	1160	52362	mandarin
H1chr2	303	900000-1000000	199030	134900	60	262	61454	mandarin
H1chr2	304	1000000-1100000	197588	135856	50	58	61410	mandarin
H1chr2	305	1100000-1200000	197406	123846	12	2	73218	mandarin
H1chr2	306	1200000-1300000	199506	147742	2	6	51332	mandarin
H1chr2	307	1300000-1400000	194522	124302	46	6	69836	mandarin
H1chr2	308	1400000-1500000	191308	135876	22	8	52770	mandarin
H1chr2	309	1500000-1600000	199396	142402	2	2	56728	mandarin
H1chr2	310	1600000-1700000	199200	136426	8	0	62476	mandarin
H1chr2	311	1700000-1800000	199556	141916	10	4	57326	mandarin
H1chr2	312	1800000-1900000	192106	138564	4	2	53332	mandarin
H1chr2	313	1900000-2000000	198598	123016	4	90	74592	mandarin
H1chr2	314	2000000-2100000	197514	122464	84	84	64616	mandarin
H1chr2	315	2100000-2200000	198382	139540	44	0	58420	mandarin
H1chr2	316	2200000-2300000	198662	142622	0	10	55666	mandarin
H1chr2	317	2300000-2400000	199400	133934	0	0	65286	mandarin
H1chr2	318	2400000-2500000	199292	137458	22	38	61612	mandarin
H1chr2	319	2500000-2600000	197848	137042	4	28	60318	mandarin
H1chr2	320	2600000-2700000	197680	134204	44	16	62622	mandarin
H1chr2	321	2700000-2800000	199306	137898	6	22	60536	mandarin
H1chr2	322	2800000-2900000	198536	124944	22	0	71358	mandarin
H1chr2	323	2900000-3000000	199062	119176	250	416	73320	mandarin
H1chr2	324	3000000-3100000	197738	130646	990	810	49806	mandarin
H1chr2	325	3100000-3200000	199114	142688	512	558	43836	mandarin
H1chr2	326	3200000-3300000	199218	125318	1856	2596	47274	mandarin
H1chr2	327	3300000-3400000	199642	145152	1164	1058	36898	mandarin
H1chr2	328	3400000-3500000	199596	134986	850	972	48784	mandarin
H1chr2	329	3500000-3600000	199062	137696	762	1058	42460	mandarin
H1chr2	330	3600000-3700000	191496	120916	1080	1798	40122	mandarin
H1chr2	331	3700000-3800000	195702	117422	2558	4970	42658	mandarin
H1chr2	332	3800000-3900000	199446	131170	1226	1746	47680	mandarin
H1chr2	333	3900000-4000000	198840	119012	1498	2098	58808	mandarin
H1chr2	334	4000000-4100000	188758	80750	5706	8614	30376	mandarin
H1chr2	335	4100000-4200000	194854	132156	862	1342	46216	mandarin
H1chr2	336	4200000-4300000	198276	116910	970	1262	55480	mandarin
H1chr2	337	4300000-4400000	198922	144928	1122	890	38048	mandarin
H1chr2	338	4400000-4500000	198972	115444	1506	2790	55598	mandarin
H1chr2	339	4500000-4600000	199034	143764	1252	860	35564	mandarin
H1chr2	340	4600000-4700000	198712	131538	918	1068	46332	mandarin
H1chr2	341	4700000-4800000	198882	139990	1056	1300	39076	mandarin
H1chr2	342	4800000-4900000	199164	137902	582	828	46768	mandarin
H1chr2	343	4900000-5000000	199280	132396	1424	1656	45958	mandarin
H1chr2	344	5000000-5100000	198926	126654	1510	2784	40098	mandarin
H1chr2	345	5100000-5200000	190754	106036	4454	5570	41272	mandarin
H1chr2	346	5200000-5300000	185332	99880	2178	906	61384	mandarin
H1chr2	347	5300000-5400000	183296	108460	1760	1958	48026	mandarin
H1chr2	348	5400000-5500000	198616	137438	1178	1276	40388	mandarin
H1chr2	349	5500000-5600000	198564	131694	686	1186	49630	mandarin
H1chr2	350	5600000-5700000	178928	100540	4386	1210	53212	mandarin
H1chr2	351	5700000-5800000	198346	134914	878	1770	41988	mandarin
H1chr2	352	5800000-5900000	193988	118852	582	1788	55430	mandarin
H1chr2	353	5900000-6000000	197698	131450	1232	1762	48194	mandarin
H1chr2	354	6000000-6100000	191200	117936	3050	2596	38524	mandarin
H1chr2	355	6100000-6200000	186862	123718	1458	1084	39912	mandarin
H1chr2	356	6200000-6300000	163046	80732	1234	2250	42520	mandarin
H1chr2	357	6300000-6400000	197220	84952	10790	3632	31666	mandarin
H1chr2	358	6400000-6500000	198848	144686	678	566	39802	mandarin
H1chr2	359	6500000-6600000	195818	125384	1780	1318	47028	mandarin
H1chr2	360	6600000-6700000	199332	138016	1602	1922	32008	mandarin
H1chr2	361	6700000-6800000	196630	121908	2362	1324	41416	mandarin
H1chr2	362	6800000-6900000	199348	129236	1100	1700	47408	mandarin
H1chr2	363	6900000-7000000	188010	123276	810	2308	42100	mandarin
H1chr2	364	7000000-7100000	199174	136548	910	670	49378	mandarin
H1chr2	365	7100000-7200000	199156	136276	986	1102	42312	mandarin
H1chr2	366	7200000-7300000	197708	126660	1642	2130	47836	mandarin
H1chr2	367	7300000-7400000	199020	129636	1290	1876	47794	mandarin
H1chr2	368	7400000-7500000	198030	132442	2266	2272	37644	mandarin
H1chr2	369	7500000-7600000	190820	109086	1648	2794	38956	mandarin
H1chr2	370	7600000-7700000	197958	110920	1398	1404	61144	mandarin
H1chr2	371	7700000-7800000	197398	116486	2862	2388	50380	mandarin
H1chr2	372	7800000-7900000	184240	99614	1546	3210	46958	mandarin
H1chr2	373	7900000-8000000	168370	67708	1576	2228	61908	mandarin
H1chr2	374	8000000-8100000	176464	53846	3600	3570	69942	mandarin
H1chr2	375	8100000-8200000	198546	137024	1080	1986	43234	mandarin
H1chr2	376	8200000-8300000	199700	130808	2890	2866	40840	mandarin
H1chr2	377	8300000-8400000	193910	121086	2668	2190	38594	mandarin
H1chr2	378	8400000-8500000	198698	119738	1132	1292	58600	mandarin
H1chr2	379	8500000-8600000	199558	136780	588	1504	46414	mandarin
H1chr2	380	8600000-8700000	198300	125232	786	802	58218	mandarin
H1chr2	381	8700000-8800000	198038	107046	3134	2982	52196	mandarin
H1chr2	382	8800000-8900000	191498	121384	926	2058	40442	mandarin
H1chr2	383	8900000-9000000	196136	117512	2474	4478	42154	mandarin
H1chr2	384	9000000-9100000	198942	111830	1786	1554	65142	mandarin
H1chr2	385	9100000-9200000	196684	109398	2648	2518	53388	mandarin
H1chr2	386	9200000-9300000	179246	112638	1342	882	36922	mandarin
H1chr2	387	9300000-9400000	199354	129592	1396	4520	43320	mandarin
H1chr2	388	9400000-9500000	197534	118708	776	940	61986	mandarin
H1chr2	389	9500000-9600000	196220	131684	1028	1124	48446	mandarin
H1chr2	390	9600000-9700000	198706	118070	722	1468	58196	mandarin
H1chr2	391	9700000-9800000	190792	111520	2902	3962	44226	mandarin
H1chr2	392	9800000-9900000	191940	118564	1496	2506	51338	mandarin
H1chr2	393	9900000-10000000	193310	114222	2902	2368	49468	mandarin
H1chr2	394	10000000-10100000	197656	108312	3138	4174	53100	mandarin
H1chr2	395	10100000-10200000	194596	100092	2138	1032	69184	mandarin
H1chr2	396	10200000-10300000	187340	104862	1722	3002	53656	mandarin
H1chr2	397	10300000-10400000	198924	86968	650	15576	54062	mandarin
H1chr2	398	10400000-10500000	194272	109678	2930	2306	54862	mandarin
H1chr2	399	10500000-10600000	196252	106386	66	46	88220	mandarin
H1chr2	400	10600000-10700000	198304	119016	596	962	69164	mandarin
H1chr2	401	10700000-10800000	193114	105626	682	578	69966	mandarin
H1chr2	402	10800000-10900000	195728	111334	256	334	77196	mandarin
H1chr2	403	10900000-11000000	188334	102562	308	992	78462	mandarin
H1chr2	404	11000000-11100000	194316	106594	746	1854	72078	mandarin
H1chr2	405	11100000-11200000	181520	102028	836	1252	62218	mandarin
H1chr2	406	11200000-11300000	196428	127324	4438	2266	41302	mandarin
H1chr2	407	11300000-11400000	180532	102348	6270	5350	37372	mandarin
H1chr2	408	11400000-11500000	193550	78784	6688	27020	19624	Undetermined
H1chr2	409	11500000-11600000	189184	131948	312	1406	52606	mandarin
H1chr2	410	11600000-11700000	187674	115444	982	1598	62670	mandarin
H1chr2	411	11700000-11800000	196926	131602	1494	1566	46356	mandarin
H1chr2	412	11800000-11900000	199500	136332	1040	2252	45810	mandarin
H1chr2	413	11900000-12000000	195458	121768	316	388	66486	mandarin
H1chr2	414	12000000-12100000	193918	122442	612	1064	63052	mandarin
H1chr2	415	12100000-12200000	186248	107142	42	182	77860	mandarin
H1chr2	416	12200000-12300000	185740	90624	66	44	94304	mandarin
H1chr2	417	12300000-12400000	168524	77500	136	440	84826	mandarin
H1chr2	418	12400000-12500000	190150	104172	56	108	84972	mandarin
H1chr2	419	12500000-12600000	195738	132150	1362	886	50992	mandarin
H1chr2	420	12600000-12700000	198928	139356	392	888	48156	mandarin
H1chr2	421	12700000-12800000	198078	129852	2612	2384	44492	mandarin
H1chr2	422	12800000-12900000	198952	123880	1730	1568	55388	mandarin
H1chr2	423	12900000-13000000	196186	114166	758	1620	68656	mandarin
H1chr2	424	13000000-13100000	192776	119188	1130	1448	61592	mandarin
H1chr2	425	13100000-13200000	192516	129904	782	1100	50832	mandarin
H1chr2	426	13200000-13300000	198364	114942	2086	1824	59304	mandarin
H1chr2	427	13300000-13400000	198924	118110	492	452	73104	mandarin
H1chr2	428	13400000-13500000	198934	112974	1288	2252	66438	mandarin
H1chr2	429	13500000-13600000	198328	105588	634	562	80920	mandarin
H1chr2	430	13600000-13700000	193250	102864	2312	2254	69040	mandarin
H1chr2	431	13700000-13800000	194182	130512	370	292	56730	mandarin
H1chr2	432	13800000-13900000	149666	76074	182	416	54262	mandarin
H1chr2	433	13900000-14000000	182498	76986	22	10	104806	mandarin
H1chr2	434	14000000-14100000	196630	109772	380	282	81264	mandarin
H1chr2	435	14100000-14200000	198570	124514	950	986	59128	mandarin
H1chr2	436	14200000-14300000	192110	112890	1042	822	68066	mandarin
H1chr2	437	14300000-14400000	197880	125564	1200	2154	55500	mandarin
H1chr2	438	14400000-14500000	192894	118084	1358	518	60534	mandarin
H1chr2	439	14500000-14600000	185004	112268	1528	1828	52588	mandarin
H1chr2	440	14600000-14700000	193974	116346	254	266	74844	mandarin
H1chr2	441	14700000-14800000	198666	132908	150	2	65290	mandarin
H1chr2	442	14800000-14900000	194790	121168	92	0	70626	mandarin
H1chr2	443	14900000-15000000	184118	119410	0	26	64482	mandarin
H1chr2	444	15000000-15100000	193848	107700	22	20	85846	mandarin
H1chr2	445	15100000-15200000	194110	117468	0	0	76332	mandarin
H1chr2	446	15200000-15300000	198002	129262	186	402	62506	mandarin
H1chr2	447	15300000-15400000	196740	127086	432	448	61236	mandarin
H1chr2	448	15400000-15500000	192262	92066	3454	1160	67960	mandarin
H1chr2	449	15500000-15600000	197114	75532	4550	6222	55140	mandarin
H1chr2	450	15600000-15700000	183666	111006	2104	504	53016	mandarin
H1chr2	451	15700000-15800000	188478	86582	4080	5896	48374	mandarin
H1chr2	452	15800000-15900000	195996	107126	416	412	81384	mandarin
H1chr2	453	15900000-16000000	197660	111158	622	1152	74094	mandarin
H1chr2	454	16000000-16100000	197040	123116	1412	1794	55200	mandarin
H1chr2	455	16100000-16200000	197488	86184	232	640	101424	mandarin
H1chr2	456	16200000-16300000	174162	71846	284	138	99070	mandarin
H1chr2	457	16300000-16400000	197822	129748	68	102	65552	mandarin
H1chr2	458	16400000-16500000	195480	107686	104	158	85482	mandarin
H1chr2	459	16500000-16600000	150362	60962	1710	716	74320	mandarin
H1chr2	460	16600000-16700000	101530	51498	3620	380	35692	mandarin
H1chr2	461	16700000-16800000	147672	65904	2230	510	60822	mandarin
H1chr2	462	16800000-16900000	191054	103760	106	278	83270	mandarin
H1chr2	463	16900000-17000000	175696	84108	158	126	89138	mandarin
H1chr2	464	17000000-17100000	184314	98330	206	112	83000	mandarin
H1chr2	465	17100000-17200000	169392	50418	110	38	110634	mandarin
H1chr2	466	17200000-17300000	187484	109498	124	104	75996	mandarin
H1chr2	467	17300000-17400000	188038	81484	154	288	104330	mandarin
H1chr2	468	17400000-17500000	180980	86478	202	184	91576	mandarin
H1chr2	469	17500000-17600000	191874	85928	92	228	103064	mandarin
H1chr2	470	17600000-17700000	184586	100568	488	162	80964	mandarin
H1chr2	471	17700000-17800000	179698	101108	272	106	75772	mandarin
H1chr2	472	17800000-17900000	191308	118400	280	168	68898	mandarin
H1chr2	473	17900000-18000000	181604	77988	898	620	96276	mandarin
H1chr2	474	18000000-18100000	185110	111698	204	170	70698	mandarin
H1chr2	475	18100000-18200000	165504	107664	186	100	55400	mandarin
H1chr2	476	18200000-18300000	188382	99700	532	952	79312	mandarin
H1chr2	477	18300000-18400000	181282	102452	104	192	74682	mandarin
H1chr2	478	18400000-18500000	188856	112872	322	296	73340	mandarin
H1chr2	479	18500000-18600000	180190	105342	118	276	72020	mandarin
H1chr2	480	18600000-18700000	194778	118968	276	84	72592	mandarin
H1chr2	481	18700000-18800000	193710	103544	90	162	87610	mandarin
H1chr2	482	18800000-18900000	175030	95438	482	178	75570	mandarin
H1chr2	483	18900000-19000000	193750	84596	414	262	102398	mandarin
H1chr2	484	19000000-19100000	191646	109188	346	146	79180	mandarin
H1chr2	485	19100000-19200000	197040	112788	66	96	74130	mandarin
H1chr2	486	19200000-19300000	199250	118134	374	92	77652	mandarin
H1chr2	487	19300000-19400000	193462	116696	308	128	72252	mandarin
H1chr2	488	19400000-19500000	196968	118530	482	296	71870	mandarin
H1chr2	489	19500000-19600000	197704	111922	848	2674	70010	mandarin
H1chr2	490	19600000-19700000	198158	101204	3656	21978	31130	Undetermined
H1chr2	491	19700000-19800000	194196	88594	3864	9796	47420	mandarin
H1chr2	492	19800000-19900000	194136	69378	5374	24478	24240	Undetermined
H1chr2	493	19900000-20000000	195468	97260	3850	4664	51052	mandarin
H1chr2	494	20000000-20100000	195076	54438	3170	2768	88596	mandarin
H1chr2	495	20100000-20200000	198174	129004	302	524	62588	mandarin
H1chr2	496	20200000-20300000	198158	120242	1124	1082	64802	mandarin
H1chr2	497	20300000-20400000	167116	70160	716	316	86074	mandarin
H1chr2	498	20400000-20500000	197802	91154	204	214	99828	mandarin
H1chr2	499	20500000-20600000	190330	114532	4	2	75154	mandarin
H1chr2	500	20600000-20700000	181632	98892	94	160	81424	mandarin
H1chr2	501	20700000-20800000	178010	67570	68	4	109610	mandarin
H1chr2	502	20800000-20900000	190664	86348	42	156	103090	mandarin
H1chr2	503	20900000-21000000	188966	99458	24	76	88294	mandarin
H1chr2	504	21000000-21100000	196446	105580	264	302	85278	mandarin
H1chr2	505	21100000-21200000	195370	118306	8	128	75786	mandarin
H1chr2	506	21200000-21300000	181028	88658	470	400	85050	mandarin
H1chr2	507	21300000-21400000	194000	97766	14	226	95064	mandarin
H1chr2	508	21400000-21500000	180340	98770	542	442	76930	mandarin
H1chr2	509	21500000-21600000	199570	134126	450	852	55936	mandarin
H1chr2	510	21600000-21700000	195992	127430	474	876	57656	mandarin
H1chr2	511	21700000-21800000	192964	83178	918	2774	85312	mandarin
H1chr2	512	21800000-21900000	197180	91908	3786	3718	64600	mandarin
H1chr2	513	21900000-22000000	196680	109778	3440	1126	64766	mandarin
H1chr2	514	22000000-22100000	196202	104116	4374	2770	43124	mandarin
H1chr2	515	22100000-22200000	188762	103106	1012	450	72202	mandarin
H1chr2	516	22200000-22300000	186180	113150	1004	778	56570	mandarin
H1chr2	517	22300000-22400000	195832	99652	324	226	91398	mandarin
H1chr2	518	22400000-22500000	196702	113940	318	630	76438	mandarin
H1chr2	519	22500000-22600000	197954	110076	1226	1362	70400	mandarin
H1chr2	520	22600000-22700000	198566	105768	1634	838	74120	mandarin
H1chr2	521	22700000-22800000	198756	137054	468	236	55732	mandarin
H1chr2	522	22800000-22900000	195956	117072	1798	2096	60132	mandarin
H1chr2	523	22900000-23000000	192542	109648	3234	3104	50448	mandarin
H1chr2	524	23000000-23100000	197764	126826	428	444	63336	mandarin
H1chr2	525	23100000-23200000	197172	115400	72	86	80276	mandarin
H1chr2	526	23200000-23300000	198264	114886	80	162	81032	mandarin
H1chr2	527	23300000-23400000	166992	96424	360	346	64110	mandarin
H1chr2	528	23400000-23500000	188940	128550	1802	1530	44176	mandarin
H1chr2	529	23500000-23600000	196160	115846	724	636	69742	mandarin
H1chr2	530	23600000-23700000	195820	88668	296	398	100852	mandarin
H1chr2	531	23700000-23800000	194436	120632	172	246	69102	mandarin
H1chr2	532	23800000-23900000	192508	73566	534	718	107858	mandarin
H1chr2	533	23900000-24000000	194960	121444	1170	1024	60770	mandarin
H1chr2	534	24000000-24100000	197950	134836	990	1112	48856	mandarin
H1chr2	535	24100000-24200000	175280	100282	1732	1466	52664	mandarin
H1chr2	536	24200000-24300000	179152	83548	2896	2132	65570	mandarin
H1chr2	537	24300000-24400000	197930	106354	1612	1444	69166	mandarin
H1chr2	538	24400000-24500000	198806	132320	390	1022	58178	mandarin
H1chr2	539	24500000-24600000	184636	117560	990	606	56474	mandarin
H1chr2	540	24600000-24700000	192976	120948	2544	4932	41476	mandarin
H1chr2	541	24700000-24800000	197738	124494	632	1126	62774	mandarin
H1chr2	542	24800000-24900000	198554	120068	188	286	71892	mandarin
H1chr2	543	24900000-25000000	196200	130826	234	516	56152	mandarin
H1chr2	544	25000000-25100000	195338	115748	152	460	74116	mandarin
H1chr2	545	25100000-25200000	192076	122040	1388	2338	47802	mandarin
H1chr2	546	25200000-25300000	195134	104530	5036	4646	37426	mandarin
H1chr2	547	25300000-25400000	191642	102978	7612	5630	32732	mandarin
H1chr2	548	25400000-25500000	192926	73200	1718	2892	85368	mandarin
H1chr2	549	25500000-25600000	199574	124798	932	1030	61416	mandarin
H1chr2	550	25600000-25700000	192706	107934	804	1646	66588	mandarin
H1chr2	551	25700000-25800000	175280	87700	498	1792	56084	mandarin
H1chr2	552	25800000-25900000	191100	128992	1210	2472	33914	mandarin
H1chr2	553	25900000-26000000	190430	104806	4878	4768	36268	mandarin
H1chr2	554	26000000-26100000	193838	104542	1678	2256	65990	mandarin
H1chr2	555	26100000-26200000	199068	138402	1068	1224	46716	mandarin
H1chr2	556	26200000-26300000	194474	122046	2704	3230	43392	mandarin
H1chr2	557	26300000-26400000	127986	41980	2632	4196	17030	mandarin
H1chr2	558	26400000-26500000	199250	132136	1610	1884	43254	mandarin
H1chr2	559	26500000-26600000	199584	140246	1222	1436	41710	mandarin
H1chr2	560	26600000-26700000	199120	125460	1456	1240	53362	mandarin
H1chr2	561	26700000-26800000	79862	30392	536	1572	12320	mandarin
H1chr2	562	26800000-26900000	198988	109788	1324	2362	49496	mandarin
H1chr2	563	26900000-27000000	197942	121666	1106	1502	46988	mandarin
H1chr2	564	27000000-27100000	198522	124030	1226	2126	48934	mandarin
H1chr2	565	27100000-27200000	199046	125494	2726	3608	40102	mandarin
H1chr2	566	27200000-27300000	196710	107780	1804	1662	71328	mandarin
H1chr2	567	27300000-27400000	192916	108916	892	1068	62212	mandarin
H1chr2	568	27400000-27500000	195814	110848	1120	1368	67016	mandarin
H1chr2	569	27500000-27600000	196216	118732	1426	2044	54394	mandarin
H1chr2	570	27600000-27700000	199450	135652	842	1050	47474	mandarin
H1chr2	571	27700000-27800000	183606	108722	1064	1356	50254	mandarin
H1chr2	572	27800000-27900000	198892	130840	900	1558	48148	mandarin
H1chr2	573	27900000-28000000	196572	121428	672	398	64266	mandarin
H1chr2	574	28000000-28100000	187270	116858	1794	3272	46120	mandarin
H1chr2	575	28100000-28200000	199672	123834	546	568	62348	mandarin
H1chr2	576	28200000-28300000	199542	128528	1502	1412	48924	mandarin
H1chr2	577	28300000-28400000	194742	128440	878	748	50402	mandarin
H1chr2	578	28400000-28500000	193288	96126	2030	4276	51756	mandarin
H1chr2	579	28500000-28600000	198940	120168	1362	1228	64912	mandarin
H1chr2	580	28600000-28700000	186954	99610	2592	3394	50062	mandarin
H1chr2	581	28700000-28800000	188862	120014	3084	3524	33244	mandarin
H1chr2	582	28800000-28900000	197832	127454	1534	3782	44060	mandarin
H1chr2	583	28900000-29000000	156814	80952	1440	4462	40124	mandarin
H1chr2	584	29000000-29100000	192420	120598	898	1962	51350	mandarin
H1chr2	585	29100000-29200000	198210	121096	3656	14634	32028	mandarin
H1chr2	586	29200000-29300000	193838	114236	2078	4464	46454	mandarin
H1chr2	587	29300000-29400000	198186	128250	1170	2268	49344	mandarin
H1chr2	588	29400000-29500000	199798	123320	1116	1928	56514	mandarin
H1chr2	589	29500000-29600000	195268	114180	1692	3248	55844	mandarin
H1chr2	590	29600000-29700000	193998	114988	6650	3500	37046	mandarin
H1chr2	591	29700000-29800000	158322	86376	4308	4602	34438	mandarin
H1chr2	592	29800000-29900000	193848	108974	2368	4090	57954	mandarin
H1chr2	593	29900000-30000000	196190	115728	3408	3114	42246	mandarin
H1chr2	594	30000000-30100000	168972	38300	2894	46890	11048	pummelo
H1chr2	595	30100000-30200000	196524	125622	1934	2706	44284	mandarin
H1chr2	596	30200000-30300000	195084	101726	798	1636	73612	mandarin
H1chr2	597	30300000-30400000	189380	89512	1216	1478	81936	mandarin
H1chr2	598	30400000-30500000	190666	24626	2880	5316	60608	mandarin
H1chr2	599	30500000-30600000	184228	30330	5154	5264	49240	mandarin
H1chr2	600	30600000-30700000	195536	108250	3562	3980	41066	mandarin
H1chr2	601	30700000-30800000	195576	98960	3010	10428	42042	mandarin
H1chr2	602	30800000-30900000	192422	90348	682	708	89472	mandarin
H1chr2	603	30900000-31000000	161534	73408	3940	1212	59896	mandarin
H1chr2	604	31000000-31100000	198078	128180	1524	2358	42998	mandarin
H1chr2	605	31100000-31200000	198158	148416	2540	3344	25580	mandarin
H1chr2	606	31200000-31300000	166866	102406	1144	1750	48120	mandarin
H1chr2	607	31300000-31400000	192812	123044	1250	1678	46232	mandarin
H1chr2	608	31400000-31500000	175246	55450	11398	5924	38214	mandarin
H1chr2	609	31500000-31600000	174262	85442	3726	1460	55374	mandarin
H1chr2	610	31600000-31700000	187068	84946	932	514	88626	mandarin
H1chr2	611	31700000-31800000	195556	134110	1068	1842	43312	mandarin
H1chr2	612	31800000-31900000	168264	79108	1456	1376	52064	mandarin
H1chr2	613	31900000-32000000	194560	108588	1982	2874	51246	mandarin
H1chr2	614	32000000-32100000	199306	140872	624	1472	43044	mandarin
H1chr2	615	32100000-32200000	197226	134818	1096	1812	43454	mandarin
H1chr2	616	32200000-32300000	195294	132024	1176	1732	48418	mandarin
H1chr2	617	32300000-32400000	193002	114254	708	594	66918	mandarin
H1chr2	618	32400000-32432764	40812	14932	224	170	20896	mandarin
H1chr3	619	0-100000	168436	97112	1394	2458	42414	mandarin
H1chr3	620	100000-200000	199620	133132	1136	624	48988	mandarin
H1chr3	621	200000-300000	199236	118512	1878	1472	44560	mandarin
H1chr3	622	300000-400000	197014	118804	1460	1812	39818	mandarin
H1chr3	623	400000-500000	199774	141258	536	552	45842	mandarin
H1chr3	624	500000-600000	197340	118758	1250	2170	46100	mandarin
H1chr3	625	600000-700000	199156	143192	532	746	44084	mandarin
H1chr3	626	700000-800000	197694	131386	1920	1142	43074	mandarin
H1chr3	627	800000-900000	199170	129612	1088	2104	48154	mandarin
H1chr3	628	900000-1000000	193932	94390	2392	2268	48660	mandarin
H1chr3	629	1000000-1100000	199038	130100	962	1894	46936	mandarin
H1chr3	630	1100000-1200000	193004	93120	3082	4092	46382	mandarin
H1chr3	631	1200000-1300000	194034	111950	1502	2328	43810	mandarin
H1chr3	632	1300000-1400000	199192	130072	1502	1264	44126	mandarin
H1chr3	633	1400000-1500000	199502	127476	708	1126	54372	mandarin
H1chr3	634	1500000-1600000	199688	131264	866	1472	48352	mandarin
H1chr3	635	1600000-1700000	199370	140938	688	944	42024	mandarin
H1chr3	636	1700000-1800000	198602	141458	698	734	40572	mandarin
H1chr3	637	1800000-1900000	197918	128840	916	1628	50156	mandarin
H1chr3	638	1900000-2000000	198244	138562	962	1292	41694	mandarin
H1chr3	639	2000000-2100000	199536	127800	918	1652	51214	mandarin
H1chr3	640	2100000-2200000	199246	123364	1534	2084	45004	mandarin
H1chr3	641	2200000-2300000	199126	123650	1512	1522	38474	mandarin
H1chr3	642	2300000-2400000	199486	118454	2706	3332	42822	mandarin
H1chr3	643	2400000-2500000	199418	140954	1588	1736	34368	mandarin
H1chr3	644	2500000-2600000	198684	123718	1164	3512	46936	mandarin
H1chr3	645	2600000-2700000	198944	138638	1008	1234	44826	mandarin
H1chr3	646	2700000-2800000	194012	119946	1980	1530	44502	mandarin
H1chr3	647	2800000-2900000	199740	135968	910	826	46562	mandarin
H1chr3	648	2900000-3000000	199248	132944	1226	2182	42960	mandarin
H1chr3	649	3000000-3100000	194618	135508	738	1182	41280	mandarin
H1chr3	650	3100000-3200000	199518	131144	838	1606	47576	mandarin
H1chr3	651	3200000-3300000	198562	133130	1858	1892	39404	mandarin
H1chr3	652	3300000-3400000	199658	138742	852	1326	43822	mandarin
H1chr3	653	3400000-3500000	195644	114258	1828	1220	39056	mandarin
H1chr3	654	3500000-3600000	198572	121000	1354	2034	51212	mandarin
H1chr3	655	3600000-3700000	195722	129480	1130	734	48210	mandarin
H1chr3	656	3700000-3800000	182004	119104	450	1556	34674	mandarin
H1chr3	657	3800000-3900000	199132	128492	970	1158	47000	mandarin
H1chr3	658	3900000-4000000	199554	143916	1176	2078	36102	mandarin
H1chr3	659	4000000-4100000	198698	133928	1470	1842	41210	mandarin
H1chr3	660	4100000-4200000	199338	131074	1234	1294	47176	mandarin
H1chr3	661	4200000-4300000	197616	124334	4382	5372	34364	mandarin
H1chr3	662	4300000-4400000	197394	103182	2496	2510	43046	mandarin
H1chr3	663	4400000-4500000	198672	137440	1344	2318	38098	mandarin
H1chr3	664	4500000-4600000	190616	119032	1824	2680	45600	mandarin
H1chr3	665	4600000-4700000	195442	119040	2116	1996	39984	mandarin
H1chr3	666	4700000-4800000	198544	136172	1540	2514	40240	mandarin
H1chr3	667	4800000-4900000	197188	132270	782	1510	41372	mandarin
H1chr3	668	4900000-5000000	198336	132164	958	1506	47998	mandarin
H1chr3	669	5000000-5100000	197246	104030	1588	2022	34850	mandarin
H1chr3	670	5100000-5200000	190632	114868	758	1780	56744	mandarin
H1chr3	671	5200000-5300000	198788	136284	980	4126	40884	mandarin
H1chr3	672	5300000-5400000	198656	126042	988	1716	53454	mandarin
H1chr3	673	5400000-5500000	197302	110570	1286	2436	60014	mandarin
H1chr3	674	5500000-5600000	199416	145528	1046	796	36618	mandarin
H1chr3	675	5600000-5700000	199352	135864	1088	2494	40518	mandarin
H1chr3	676	5700000-5800000	199104	134872	772	914	49104	mandarin
H1chr3	677	5800000-5900000	198834	141212	928	1058	38964	mandarin
H1chr3	678	5900000-6000000	197944	120572	894	2242	51892	mandarin
H1chr3	679	6000000-6100000	198640	146548	1838	2204	27466	mandarin
H1chr3	680	6100000-6200000	194898	128800	606	1394	47796	mandarin
H1chr3	681	6200000-6300000	199556	136408	794	1100	47216	mandarin
H1chr3	682	6300000-6400000	198584	117834	2326	2728	51430	mandarin
H1chr3	683	6400000-6500000	199482	138144	900	1586	41190	mandarin
H1chr3	684	6500000-6600000	199270	145360	108	242	50312	mandarin
H1chr3	685	6600000-6700000	198592	139204	20	0	59210	mandarin
H1chr3	686	6700000-6800000	188404	114326	66	92	73202	mandarin
H1chr3	687	6800000-6900000	199436	143596	0	2	55638	mandarin
H1chr3	688	6900000-7000000	199306	139366	88	20	58774	mandarin
H1chr3	689	7000000-7100000	194486	118566	0	246	71360	mandarin
H1chr3	690	7100000-7200000	198912	125556	2	2	73100	mandarin
H1chr3	691	7200000-7300000	198836	134362	88	24	63726	mandarin
H1chr3	692	7300000-7400000	198708	122116	2	4	76126	mandarin
H1chr3	693	7400000-7500000	192600	138674	36	0	53484	mandarin
H1chr3	694	7500000-7600000	199532	147472	30	14	51916	mandarin
H1chr3	695	7600000-7700000	192534	117678	120	66	73840	mandarin
H1chr3	696	7700000-7800000	199266	137082	14	0	61728	mandarin
H1chr3	697	7800000-7900000	199100	146022	42	0	52786	mandarin
H1chr3	698	7900000-8000000	199358	155480	0	4	43636	mandarin
H1chr3	699	8000000-8100000	198060	140470	0	0	57488	mandarin
H1chr3	700	8100000-8200000	199522	135656	10	0	63750	mandarin
H1chr3	701	8200000-8300000	199322	135718	0	40	63250	mandarin
H1chr3	702	8300000-8400000	197098	130924	4	8	65420	mandarin
H1chr3	703	8400000-8500000	198788	135794	32	2	62862	mandarin
H1chr3	704	8500000-8600000	198528	132050	0	58	66272	mandarin
H1chr3	705	8600000-8700000	198864	118484	8	10	68760	mandarin
H1chr3	706	8700000-8800000	199538	138946	926	714	47608	mandarin
H1chr3	707	8800000-8900000	191274	104680	1802	1464	54542	mandarin
H1chr3	708	8900000-9000000	191548	93462	3612	3166	54060	mandarin
H1chr3	709	9000000-9100000	198420	132992	788	1496	47196	mandarin
H1chr3	710	9100000-9200000	197722	116574	3618	1496	38368	mandarin
H1chr3	711	9200000-9300000	199068	137556	1280	1656	37912	mandarin
H1chr3	712	9300000-9400000	195186	113522	634	1990	52758	mandarin
H1chr3	713	9400000-9500000	197234	132996	2062	2030	40234	mandarin
H1chr3	714	9500000-9600000	196126	124240	2012	2228	42684	mandarin
H1chr3	715	9600000-9700000	181492	74440	4042	3542	64032	mandarin
H1chr3	716	9700000-9800000	151294	66250	3380	21878	21242	Undetermined
H1chr3	717	9800000-9900000	197622	86486	5198	27376	26554	Undetermined
H1chr3	718	9900000-10000000	198810	119740	2118	1420	59454	mandarin
H1chr3	719	10000000-10100000	199738	137040	1750	1288	43864	mandarin
H1chr3	720	10100000-10200000	170118	83896	1984	3020	61566	mandarin
H1chr3	721	10200000-10300000	128500	41624	648	932	74968	mandarin
H1chr3	722	10300000-10400000	198412	111884	3132	4488	26450	mandarin
H1chr3	723	10400000-10500000	199274	139644	2856	3020	26390	mandarin
H1chr3	724	10500000-10600000	171690	71046	9182	12818	12728	Undetermined
H1chr3	725	10600000-10700000	187238	91634	1700	7042	56718	mandarin
H1chr3	726	10700000-10800000	158800	31806	7618	8576	44800	mandarin
H1chr3	727	10800000-10900000	190682	31108	4278	15784	35342	mandarin
H1chr3	728	10900000-11000000	168146	54104	5900	15274	27084	Undetermined
H1chr3	729	11000000-11100000	173272	44912	6878	15622	22220	Undetermined
H1chr3	730	11100000-11200000	143678	31470	7458	16956	7810	pummelo
H1chr3	731	11200000-11300000	188322	32526	9402	20372	13286	Undetermined
H1chr3	732	11300000-11400000	184162	87458	2168	8706	50286	mandarin
H1chr3	733	11400000-11500000	186476	67246	13672	26098	10276	Undetermined
H1chr3	734	11500000-11600000	193460	46710	6492	14108	19298	Undetermined
H1chr3	735	11600000-11700000	179108	92918	4172	9530	25676	mandarin
H1chr3	736	11700000-11800000	196364	127898	2002	2314	42558	mandarin
H1chr3	737	11800000-11900000	188624	117276	1682	3782	47892	mandarin
H1chr3	738	11900000-12000000	193000	84238	5200	5888	43478	mandarin
H1chr3	739	12000000-12100000	142408	36676	2710	900	48024	mandarin
H1chr3	740	12100000-12200000	154896	63312	7622	6654	39716	mandarin
H1chr3	741	12200000-12300000	194952	115930	2358	24530	29756	Undetermined
H1chr3	742	12300000-12400000	195304	108804	3514	5092	54976	mandarin
H1chr3	743	12400000-12500000	187352	92304	8986	8132	15040	Undetermined
H1chr3	744	12500000-12600000	172678	55798	7202	8308	17244	mandarin
H1chr3	745	12600000-12700000	104184	17476	1816	2152	22014	mandarin
H1chr3	746	12700000-12800000	197268	116262	912	2124	56864	mandarin
H1chr3	747	12800000-12900000	165066	65662	6820	18638	19644	Undetermined
H1chr3	748	12900000-13000000	185364	83486	8780	10516	32248	mandarin
H1chr3	749	13000000-13100000	146650	57560	3910	4020	35884	mandarin
H1chr3	750	13100000-13200000	177636	80190	4790	13288	18454	Undetermined
H1chr3	751	13200000-13300000	184850	73980	3218	9520	22444	mandarin
H1chr3	752	13300000-13400000	192608	116492	1060	1862	40430	mandarin
H1chr3	753	13400000-13500000	189000	104368	1670	2060	42808	mandarin
H1chr3	754	13500000-13600000	193768	101348	278	552	79938	mandarin
H1chr3	755	13600000-13700000	71080	22816	564	480	34660	mandarin
H1chr3	756	13700000-13800000	109800	48338	1196	322	33662	mandarin
H1chr3	757	13800000-13900000	194408	112206	1200	1766	60440	mandarin
H1chr3	758	13900000-14000000	193140	91850	3194	3626	64146	mandarin
H1chr3	759	14000000-14100000	189604	98014	5886	1384	57606	mandarin
H1chr3	760	14100000-14200000	197686	112742	1052	2650	59712	mandarin
H1chr3	761	14200000-14300000	183432	119906	1528	3312	31200	mandarin
H1chr3	762	14300000-14400000	191280	123178	670	516	54140	mandarin
H1chr3	763	14400000-14500000	186270	70978	1330	3708	77884	mandarin
H1chr3	764	14500000-14600000	195972	95772	26568	2990	39168	Undetermined
H1chr3	765	14600000-14700000	181540	93280	4054	2400	50210	mandarin
H1chr3	766	14700000-14800000	186614	74334	11288	8366	24202	mandarin
H1chr3	767	14800000-14900000	196688	35928	16864	8662	13018	Undetermined
H1chr3	768	14900000-15000000	191988	41392	10544	9644	15276	Undetermined
H1chr3	769	15000000-15100000	194162	78944	3448	7880	45668	mandarin
H1chr3	770	15100000-15200000	164452	56924	162	288	97750	mandarin
H1chr3	771	15200000-15300000	165106	78114	250	916	74438	mandarin
H1chr3	772	15300000-15400000	191166	95166	1086	4430	48654	mandarin
H1chr3	773	15400000-15500000	195992	35078	6608	9362	11450	Undetermined
H1chr3	774	15500000-15600000	184772	94690	1140	2136	63364	mandarin
H1chr3	775	15600000-15700000	192538	89882	1626	2000	67844	mandarin
H1chr3	776	15700000-15800000	190558	109850	2252	3322	47774	mandarin
H1chr3	777	15800000-15900000	166198	46022	21936	23276	12362	Undetermined
H1chr3	778	15900000-16000000	168824	67820	11108	22234	7908	pummelo
H1chr3	779	16000000-16100000	199322	134488	1256	1844	46032	mandarin
H1chr3	780	16100000-16200000	193152	97196	646	1016	77842	mandarin
H1chr3	781	16200000-16300000	189858	90598	1278	1428	69818	mandarin
H1chr3	782	16300000-16400000	177824	115312	962	1582	44868	mandarin
H1chr3	783	16400000-16500000	186812	90754	2620	3800	56642	mandarin
H1chr3	784	16500000-16600000	196026	97926	252	332	88308	mandarin
H1chr3	785	16600000-16700000	185814	122152	1918	2114	42074	mandarin
H1chr3	786	16700000-16800000	181892	133292	990	13084	11576	Undetermined
H1chr3	787	16800000-16900000	187080	53942	5928	20466	12816	Undetermined
H1chr3	788	16900000-17000000	190162	81386	2128	12936	43874	mandarin
H1chr3	789	17000000-17100000	180554	40572	6438	35602	10366	pummelo
H1chr3	790	17100000-17200000	184660	70728	1354	48836	30734	Undetermined
H1chr3	791	17200000-17300000	194760	126236	2982	5820	35966	mandarin
H1chr3	792	17300000-17400000	196480	107912	5694	5264	39366	mandarin
H1chr3	793	17400000-17500000	174146	85744	20954	1702	34812	Undetermined
H1chr3	794	17500000-17600000	194624	87118	2224	1994	79426	mandarin
H1chr3	795	17600000-17700000	185156	94684	7226	5476	46244	mandarin
H1chr3	796	17700000-17800000	164610	72376	3020	5786	36666	mandarin
H1chr3	797	17800000-17900000	130022	17692	2622	4444	30284	mandarin
H1chr3	798	17900000-18000000	191764	117666	1864	2584	40092	mandarin
H1chr3	799	18000000-18100000	198712	136758	1050	904	49096	mandarin
H1chr3	800	18100000-18200000	195964	118060	656	682	67256	mandarin
H1chr3	801	18200000-18300000	192728	88830	4218	9890	23700	mandarin
H1chr3	802	18300000-18400000	151304	62588	2964	2126	37346	mandarin
H1chr3	803	18400000-18500000	195544	115838	1302	2044	53342	mandarin
H1chr3	804	18500000-18600000	195916	98470	2178	1862	64600	mandarin
H1chr3	805	18600000-18700000	189228	84900	422	550	97138	mandarin
H1chr3	806	18700000-18800000	195470	107624	1688	1476	70736	mandarin
H1chr3	807	18800000-18900000	197686	109078	986	554	77390	mandarin
H1chr3	808	18900000-19000000	198380	97224	2178	1330	74488	mandarin
H1chr3	809	19000000-19100000	190106	101516	1556	2610	63544	mandarin
H1chr3	810	19100000-19200000	181762	92716	3544	5106	50404	mandarin
H1chr3	811	19200000-19300000	195794	97308	4086	3464	57552	mandarin
H1chr3	812	19300000-19400000	186482	95562	3516	9732	25926	mandarin
H1chr3	813	19400000-19500000	183986	87826	2504	5394	40324	mandarin
H1chr3	814	19500000-19600000	186392	93574	756	2942	77400	mandarin
H1chr3	815	19600000-19700000	172744	82350	1570	5428	41572	mandarin
H1chr3	816	19700000-19800000	186368	114552	62	284	66824	mandarin
H1chr3	817	19800000-19900000	185626	120030	486	570	43558	mandarin
H1chr3	818	19900000-20000000	196032	98012	1082	2606	62940	mandarin
H1chr3	819	20000000-20100000	192828	65846	2750	11716	51146	mandarin
H1chr3	820	20100000-20200000	190522	106948	1482	6324	54980	mandarin
H1chr3	821	20200000-20300000	185842	89704	2640	1658	67376	mandarin
H1chr3	822	20300000-20400000	196584	124146	850	912	59036	mandarin
H1chr3	823	20400000-20500000	199250	137470	2506	906	46612	mandarin
H1chr3	824	20500000-20600000	191640	163824	2770	214	16338	mandarin
H1chr3	825	20600000-20700000	195936	140988	1284	1728	39450	mandarin
H1chr3	826	20700000-20800000	194198	109390	3058	3700	50250	mandarin
H1chr3	827	20800000-20900000	195334	93624	4972	2442	62768	mandarin
H1chr3	828	20900000-21000000	197430	127720	2650	7770	29960	mandarin
H1chr3	829	21000000-21100000	194094	73390	4914	29430	22290	Undetermined
H1chr3	830	21100000-21200000	154320	60662	4574	7988	23304	mandarin
H1chr3	831	21200000-21300000	90602	27034	290	1192	22130	mandarin
H1chr3	832	21300000-21400000	165358	60338	1636	1626	65248	mandarin
H1chr3	833	21400000-21500000	192154	74484	1162	2884	69764	mandarin
H1chr3	834	21500000-21600000	179796	95264	2206	3192	49110	mandarin
H1chr3	835	21600000-21700000	177334	95442	1906	3180	36782	mandarin
H1chr3	836	21700000-21800000	185412	105524	1282	2256	62120	mandarin
H1chr3	837	21800000-21900000	185130	96030	1094	2120	73486	mandarin
H1chr3	838	21900000-22000000	179786	89796	2150	19106	39742	mandarin
H1chr3	839	22000000-22100000	181262	104382	2180	15078	33918	mandarin
H1chr3	840	22100000-22200000	194722	131206	950	1308	47468	mandarin
H1chr3	841	22200000-22300000	190298	114064	2072	2380	47944	mandarin
H1chr3	842	22300000-22400000	178202	112870	3068	1302	39198	mandarin
H1chr3	843	22400000-22500000	192624	51256	12556	5044	24658	Undetermined
H1chr3	844	22500000-22600000	197702	130410	1444	1496	47878	mandarin
H1chr3	845	22600000-22700000	166206	96164	4516	2884	37212	mandarin
H1chr3	846	22700000-22800000	194588	86532	3048	3004	75600	mandarin
H1chr3	847	22800000-22900000	196564	119708	2852	2042	48848	mandarin
H1chr3	848	22900000-23000000	193688	95874	1538	3628	64016	mandarin
H1chr3	849	23000000-23100000	194338	97916	1352	1676	62046	mandarin
H1chr3	850	23100000-23200000	196698	97950	2804	3634	62944	mandarin
H1chr3	851	23200000-23300000	188228	94976	2564	2650	55028	mandarin
H1chr3	852	23300000-23400000	198312	128938	1110	1120	51392	mandarin
H1chr3	853	23400000-23500000	196836	103838	2800	3414	53066	mandarin
H1chr3	854	23500000-23600000	197866	102286	2096	1574	68806	mandarin
H1chr3	855	23600000-23700000	193114	107004	576	828	71946	mandarin
H1chr3	856	23700000-23800000	194836	111834	348	694	72258	mandarin
H1chr3	857	23800000-23900000	199054	113232	650	1294	65958	mandarin
H1chr3	858	23900000-24000000	191384	94790	1362	2440	65796	mandarin
H1chr3	859	24000000-24100000	142874	71284	2282	2422	43490	mandarin
H1chr3	860	24100000-24200000	163976	91048	1858	1794	51096	mandarin
H1chr3	861	24200000-24300000	195712	108428	1296	1082	66344	mandarin
H1chr3	862	24300000-24400000	194556	112646	1312	834	65158	mandarin
H1chr3	863	24400000-24500000	183020	52790	1930	1624	103204	mandarin
H1chr3	864	24500000-24600000	186184	53862	1578	1094	103828	mandarin
H1chr3	865	24600000-24700000	180406	88368	638	706	78686	mandarin
H1chr3	866	24700000-24800000	191924	89704	574	796	90730	mandarin
H1chr3	867	24800000-24900000	182192	63768	662	782	105294	mandarin
H1chr3	868	24900000-25000000	177490	54306	844	1156	107582	mandarin
H1chr3	869	25000000-25100000	188558	90062	1744	1590	76956	mandarin
H1chr3	870	25100000-25200000	169262	50092	1876	878	93140	mandarin
H1chr3	871	25200000-25300000	149102	49518	1558	768	75580	mandarin
H1chr3	872	25300000-25400000	194580	75486	1714	1602	97592	mandarin
H1chr3	873	25400000-25500000	196366	58324	878	926	119324	mandarin
H1chr3	874	25500000-25600000	189156	71228	2088	1180	90498	mandarin
H1chr3	875	25600000-25700000	191084	102560	3004	2756	50570	mandarin
H1chr3	876	25700000-25800000	156136	87408	920	988	37530	mandarin
H1chr3	877	25800000-25900000	197694	113984	3800	6356	43226	mandarin
H1chr3	878	25900000-26000000	169060	86474	3282	4496	48060	mandarin
H1chr3	879	26000000-26100000	187906	92008	3334	3674	65212	mandarin
H1chr3	880	26100000-26200000	196926	87448	1590	4008	76432	mandarin
H1chr3	881	26200000-26300000	198510	99382	592	3016	80692	mandarin
H1chr3	882	26300000-26400000	192372	91154	1730	3252	74208	mandarin
H1chr3	883	26400000-26500000	196768	103610	2612	2380	63664	mandarin
H1chr3	884	26500000-26600000	194104	114874	2072	1636	53030	mandarin
H1chr3	885	26600000-26700000	192612	97518	1002	2824	55544	mandarin
H1chr3	886	26700000-26800000	177622	42374	1058	2838	77248	mandarin
H1chr3	887	26800000-26900000	159780	68558	1540	3952	42616	mandarin
H1chr3	888	26900000-27000000	196980	83488	916	2078	92846	mandarin
H1chr3	889	27000000-27100000	196536	67584	1130	1448	103196	mandarin
H1chr3	890	27100000-27200000	185946	71366	2500	2096	80176	mandarin
H1chr3	891	27200000-27300000	172984	74288	1328	898	68484	mandarin
H1chr3	892	27300000-27400000	193546	88432	1794	2144	81760	mandarin
H1chr3	893	27400000-27500000	195542	126014	1144	1104	56944	mandarin
H1chr3	894	27500000-27600000	187648	59252	554	872	79414	mandarin
H1chr3	895	27600000-27700000	131004	15328	844	4082	21388	mandarin
H1chr3	896	27700000-27800000	187658	51290	4248	15334	32904	mandarin
H1chr3	897	27800000-27900000	186100	87218	1608	4008	64658	mandarin
H1chr3	898	27900000-28000000	174064	72532	1364	3162	71224	mandarin
H1chr3	899	28000000-28100000	191866	78874	1732	3734	73278	mandarin
H1chr3	900	28100000-28200000	168228	26278	2534	5426	44150	mandarin
H1chr3	901	28200000-28300000	185924	60872	3832	11786	37160	mandarin
H1chr3	902	28300000-28400000	185484	77438	4232	4266	53254	mandarin
H1chr3	903	28400000-28500000	181112	51328	4150	5290	34092	mandarin
H1chr3	904	28500000-28600000	179082	78520	4598	5814	29986	mandarin
H1chr3	905	28600000-28700000	183102	102124	2616	3958	49076	mandarin
H1chr3	906	28700000-28800000	185336	74370	400	478	97682	mandarin
H1chr3	907	28800000-28900000	192206	88352	1830	2394	71852	mandarin
H1chr3	908	28900000-29000000	195790	58242	2752	3802	95904	mandarin
H1chr3	909	29000000-29100000	196768	92924	786	2586	79028	mandarin
H1chr3	910	29100000-29200000	184276	104780	516	564	67656	mandarin
H1chr3	911	29200000-29300000	197470	103084	6326	8158	25732	mandarin
H1chr3	912	29300000-29400000	196254	121550	2784	2820	49412	mandarin
H1chr3	913	29400000-29500000	198812	89052	460	540	101016	mandarin
H1chr3	914	29500000-29600000	195172	87376	984	896	94228	mandarin
H1chr3	915	29600000-29700000	106722	31876	208	376	42744	mandarin
H1chr3	916	29700000-29800000	192036	57972	2068	3376	37306	mandarin
H1chr3	917	29800000-29900000	192748	112536	2364	2264	54794	mandarin
H1chr3	918	29900000-30000000	198972	119014	1356	1968	51976	mandarin
H1chr3	919	30000000-30100000	198846	131874	1080	1994	48554	mandarin
H1chr3	920	30100000-30200000	190328	114662	2206	1434	47530	mandarin
H1chr3	921	30200000-30300000	176644	86388	348	888	68076	mandarin
H1chr3	922	30300000-30400000	191748	98970	2356	2708	62180	mandarin
H1chr3	923	30400000-30500000	170616	89744	1464	2682	54990	mandarin
H1chr3	924	30500000-30600000	185646	110258	830	1532	61010	mandarin
H1chr3	925	30600000-30700000	178366	92230	1480	1470	68938	mandarin
H1chr3	926	30700000-30800000	192508	84814	628	444	98816	mandarin
H1chr3	927	30800000-30900000	148604	62212	842	572	75596	mandarin
H1chr3	928	30900000-31000000	186606	69970	532	282	99264	mandarin
H1chr3	929	31000000-31100000	193014	53654	326	230	123358	mandarin
H1chr3	930	31100000-31200000	187868	73620	288	220	106224	mandarin
H1chr3	931	31200000-31300000	190662	62626	712	622	113302	mandarin
H1chr3	932	31300000-31400000	178398	66144	504	94	88786	mandarin
H1chr3	933	31400000-31500000	194718	79236	980	1604	95920	mandarin
H1chr3	934	31500000-31600000	170628	63566	3390	8516	60676	mandarin
H1chr3	935	31600000-31700000	194194	90674	3562	6896	47898	mandarin
H1chr3	936	31700000-31800000	178998	81122	2964	11296	37538	mandarin
H1chr3	937	31800000-31900000	161699	81682	394	388	74804	mandarin
H1chr3	938	31900000-32000000	194376	111260	502	344	75272	mandarin
H1chr3	939	32000000-32100000	162666	121216	456	4216	27262	mandarin
H1chr3	940	32100000-32200000	95294	24498	426	338	11416	mandarin
H1chr3	941	32200000-32300000	199264	147926	950	928	29292	mandarin
H1chr3	942	32300000-32400000	195708	120292	2856	922	43022	mandarin
H1chr3	943	32400000-32500000	191012	117484	1202	1318	49634	mandarin
H1chr3	944	32500000-32600000	184156	77854	2034	3034	68708	mandarin
H1chr3	945	32600000-32700000	196796	99280	1890	1576	64606	mandarin
H1chr3	946	32700000-32800000	197172	124508	1726	1668	46282	mandarin
H1chr3	947	32800000-32900000	196256	87190	4512	4972	48088	mandarin
H1chr3	948	32900000-33000000	187844	67822	4234	5228	40642	mandarin
H1chr3	949	33000000-33100000	122488	1106	414	250	864	mandarin
H1chr3	950	33100000-33200000	186610	57796	7944	21926	15512	Undetermined
H1chr3	951	33200000-33300000	176218	58750	24018	9074	17554	Undetermined
H1chr3	952	33300000-33400000	178190	77974	18970	13126	7798	Undetermined
H1chr3	953	33400000-33500000	176080	86336	11226	9372	19924	Undetermined
H1chr3	954	33500000-33600000	183354	87156	7088	9444	18868	Undetermined
H1chr3	955	33600000-33700000	189420	57990	19640	6226	18300	Undetermined
H1chr3	956	33700000-33800000	187036	118002	1152	1634	48730	mandarin
H1chr3	957	33800000-33900000	196292	105610	1538	1724	66296	mandarin
H1chr3	958	33900000-34000000	195396	95606	928	756	76796	mandarin
H1chr3	959	34000000-34100000	183232	87818	392	468	85372	mandarin
H1chr3	960	34100000-34200000	180620	109452	724	1220	60326	mandarin
H1chr3	961	34200000-34300000	196302	71430	7728	7166	48160	mandarin
H1chr3	962	34300000-34400000	154198	74018	2328	8758	34556	mandarin
H1chr3	963	34400000-34500000	191098	114004	2700	15140	26942	Undetermined
H1chr3	964	34500000-34600000	188522	86478	2564	2544	64272	mandarin
H1chr3	965	34600000-34700000	98358	1556	820	1378	7708	mandarin
H1chr3	966	34700000-34800000	159522	39488	3368	4684	28064	mandarin
H1chr3	967	34800000-34900000	152244	22852	2000	3520	44742	mandarin
H1chr3	968	34900000-35000000	168776	52440	3108	8270	33594	mandarin
H1chr3	969	35000000-35100000	173750	67566	5848	8218	27378	mandarin
H1chr3	970	35100000-35200000	197576	55348	4554	8050	30620	mandarin
H1chr3	971	35200000-35300000	190234	5656	3686	4368	4976	Undetermined
H1chr3	972	35300000-35400000	176598	17776	7694	5066	10960	Undetermined
H1chr3	973	35400000-35500000	167594	36092	13052	25078	11246	Undetermined
H1chr3	974	35500000-35600000	183004	97968	10220	7508	19060	Undetermined
H1chr3	975	35600000-35700000	196722	119180	11216	1880	37562	mandarin
H1chr3	976	35700000-35800000	188940	76714	1976	7816	52010	mandarin
H1chr3	977	35800000-35900000	196974	96128	752	6130	76630	mandarin
H1chr3	978	35900000-36000000	193392	91470	2364	2246	77102	mandarin
H1chr3	979	36000000-36100000	173128	53606	598	844	74732	mandarin
H1chr3	980	36100000-36200000	136592	45416	622	842	55402	mandarin
H1chr3	981	36200000-36300000	180920	93658	2598	29974	19460	Undetermined
H1chr3	982	36300000-36400000	189968	79974	14276	11502	16606	Undetermined
H1chr3	983	36400000-36500000	167218	67660	4260	8668	20798	mandarin
H1chr3	984	36500000-36600000	151476	60284	3632	6024	28598	mandarin
H1chr3	985	36600000-36700000	155834	64358	4630	7836	25734	mandarin
H1chr3	986	36700000-36800000	196730	107848	3724	4160	38238	mandarin
H1chr3	987	36800000-36900000	170312	63966	10492	4284	20044	Undetermined
H1chr3	988	36900000-37000000	184992	48606	8228	8242	23298	mandarin
H1chr3	989	37000000-37100000	194810	104160	1386	3066	50468	mandarin
H1chr3	990	37100000-37200000	195938	95438	8022	20494	11704	Undetermined
H1chr3	991	37200000-37300000	193758	111148	3100	10356	41438	mandarin
H1chr3	992	37300000-37400000	198506	114524	978	3360	55390	mandarin
H1chr3	993	37400000-37500000	169530	56736	4988	3944	43544	mandarin
H1chr3	994	37500000-37600000	184098	95360	2538	15190	31582	mandarin
H1chr3	995	37600000-37700000	184748	104682	8010	8196	16956	mandarin
H1chr3	996	37700000-37800000	193044	88370	8984	9700	38150	mandarin
H1chr3	997	37800000-37900000	190918	120170	31138	2226	21674	Undetermined
H1chr3	998	37900000-38000000	192962	176116	170	342	12688	mandarin
H1chr3	999	38000000-38100000	181374	101378	7790	8104	31498	mandarin
H1chr3	1000	38100000-38200000	192836	112944	6406	10098	36532	mandarin
H1chr3	1001	38200000-38300000	197424	116908	4902	7054	34558	mandarin
H1chr3	1002	38300000-38400000	198704	148396	782	1444	30382	mandarin
H1chr3	1003	38400000-38500000	180886	94722	1224	6176	44214	mandarin
H1chr3	1004	38500000-38600000	191716	96846	4156	11100	26382	mandarin
H1chr3	1005	38600000-38700000	167112	90818	23816	8012	13874	Undetermined
H1chr3	1006	38700000-38800000	187046	95594	25472	6044	21854	Undetermined
H1chr3	1007	38800000-38900000	190306	92722	4920	7726	40306	mandarin
H1chr3	1008	38900000-39000000	180140	79330	3754	26678	20924	Undetermined
H1chr3	1009	39000000-39100000	194004	96710	4062	9714	56272	mandarin
H1chr3	1010	39100000-39200000	185550	119968	1430	2612	45816	mandarin
H1chr3	1011	39200000-39300000	157746	87146	1196	2636	49866	mandarin
H1chr3	1012	39300000-39400000	182010	121378	1426	1648	45584	mandarin
H1chr3	1013	39400000-39500000	191396	87350	4718	3886	61086	mandarin
H1chr3	1014	39500000-39600000	195310	105474	3174	3130	55008	mandarin
H1chr3	1015	39600000-39685618	136852	60298	10214	2552	15492	Undetermined
H1chr4	1016	0-100000	104458	44838	4686	4928	9118	Undetermined
H1chr4	1017	100000-200000	50856	33624	818	2474	2836	Undetermined
H1chr4	1018	200000-300000	51362	32232	1560	3136	1714	Undetermined
H1chr4	1019	300000-400000	191374	121254	7348	5474	27610	mandarin
H1chr4	1020	400000-500000	199340	131188	2014	4478	42902	mandarin
H1chr4	1021	500000-600000	199186	122836	2444	2080	47418	mandarin
H1chr4	1022	600000-700000	196662	122480	922	1726	52694	mandarin
H1chr4	1023	700000-800000	199372	119048	1112	696	61788	mandarin
H1chr4	1024	800000-900000	199120	131756	1396	1656	46500	mandarin
H1chr4	1025	900000-1000000	181342	107892	424	1058	61254	mandarin
H1chr4	1026	1000000-1100000	191134	107618	2390	2826	50486	mandarin
H1chr4	1027	1100000-1200000	198990	142050	1146	1472	39506	mandarin
H1chr4	1028	1200000-1300000	199238	138984	1798	2780	39262	mandarin
H1chr4	1029	1300000-1400000	198112	128326	1448	2436	44458	mandarin
H1chr4	1030	1400000-1500000	199600	139998	904	1666	38222	mandarin
H1chr4	1031	1500000-1600000	197454	112356	1960	3840	50794	mandarin
H1chr4	1032	1600000-1700000	199170	121856	3004	2128	50230	mandarin
H1chr4	1033	1700000-1800000	199388	134168	670	1294	48326	mandarin
H1chr4	1034	1800000-1900000	198680	118116	2606	8702	38688	mandarin
H1chr4	1035	1900000-2000000	199578	137518	1132	1732	42048	mandarin
H1chr4	1036	2000000-2100000	199638	124974	1996	3980	44402	mandarin
H1chr4	1037	2100000-2200000	198490	117060	3334	14978	35300	mandarin
H1chr4	1038	2200000-2300000	187418	107360	3066	2290	41428	mandarin
H1chr4	1039	2300000-2400000	198688	129084	1520	2070	43434	mandarin
H1chr4	1040	2400000-2500000	196034	113592	2654	2020	52104	mandarin
H1chr4	1041	2500000-2600000	140806	70640	1172	1186	41438	mandarin
H1chr4	1042	2600000-2700000	177218	62206	1426	2812	66996	mandarin
H1chr4	1043	2700000-2800000	197556	114422	1608	2752	45004	mandarin
H1chr4	1044	2800000-2900000	199582	140940	1292	1986	32886	mandarin
H1chr4	1045	2900000-3000000	198214	143160	496	998	41492	mandarin
H1chr4	1046	3000000-3100000	197616	127348	2748	5588	29266	mandarin
H1chr4	1047	3100000-3200000	183100	100766	1660	1668	61726	mandarin
H1chr4	1048	3200000-3300000	199748	141582	1016	1150	40596	mandarin
H1chr4	1049	3300000-3400000	196070	126548	1212	1478	49120	mandarin
H1chr4	1050	3400000-3500000	194140	123988	1940	1556	46474	mandarin
H1chr4	1051	3500000-3600000	199644	133606	534	1400	51652	mandarin
H1chr4	1052	3600000-3700000	197000	104208	4424	5546	40470	mandarin
H1chr4	1053	3700000-3800000	197514	104594	1526	1546	72512	mandarin
H1chr4	1054	3800000-3900000	190498	93576	692	2158	56968	mandarin
H1chr4	1055	3900000-4000000	197610	128454	754	1332	52518	mandarin
H1chr4	1056	4000000-4100000	198648	121662	1336	1064	45676	mandarin
H1chr4	1057	4100000-4200000	199212	130162	816	1412	49388	mandarin
H1chr4	1058	4200000-4300000	197222	118606	1000	2284	52276	mandarin
H1chr4	1059	4300000-4400000	188122	110716	1142	1344	60470	mandarin
H1chr4	1060	4400000-4500000	199096	124310	1632	2118	49102	mandarin
H1chr4	1061	4500000-4600000	199158	129298	2458	2840	35184	mandarin
H1chr4	1062	4600000-4700000	197744	119646	3112	1824	50076	mandarin
H1chr4	1063	4700000-4800000	196260	117340	1490	3684	47746	mandarin
H1chr4	1064	4800000-4900000	199196	120436	622	1238	60686	mandarin
H1chr4	1065	4900000-5000000	196866	102536	4000	5810	43004	mandarin
H1chr4	1066	5000000-5100000	196666	110944	4304	4378	46384	mandarin
H1chr4	1067	5100000-5200000	196986	114620	2112	2574	50852	mandarin
H1chr4	1068	5200000-5300000	195460	103108	3342	4794	41084	mandarin
H1chr4	1069	5300000-5400000	198690	111682	2440	4524	51768	mandarin
H1chr4	1070	5400000-5500000	196056	107896	1638	4174	49298	mandarin
H1chr4	1071	5500000-5600000	195844	111844	2010	2954	52136	mandarin
H1chr4	1072	5600000-5700000	199518	125960	1710	2534	47482	mandarin
H1chr4	1073	5700000-5800000	191470	105392	2036	8064	45758	mandarin
H1chr4	1074	5800000-5900000	196218	98036	2858	4992	56204	mandarin
H1chr4	1075	5900000-6000000	192136	110892	4344	3190	35504	mandarin
H1chr4	1076	6000000-6100000	192986	103166	1436	1320	69712	mandarin
H1chr4	1077	6100000-6200000	177954	103122	612	1058	63856	mandarin
H1chr4	1078	6200000-6300000	193262	91832	1000	556	90926	mandarin
H1chr4	1079	6300000-6400000	192066	106082	1478	1692	65398	mandarin
H1chr4	1080	6400000-6500000	133548	73230	1292	1796	41750	mandarin
H1chr4	1081	6500000-6600000	193574	125148	1860	2868	47054	mandarin
H1chr4	1082	6600000-6700000	196312	109918	1834	3900	50726	mandarin
H1chr4	1083	6700000-6800000	198094	99060	3874	11036	30222	mandarin
H1chr4	1084	6800000-6900000	186318	47170	5564	13770	16244	Undetermined
H1chr4	1085	6900000-7000000	199566	124286	2854	3848	42086	mandarin
H1chr4	1086	7000000-7100000	187144	83022	1890	2988	68600	mandarin
H1chr4	1087	7100000-7200000	194014	101990	5146	5516	42680	mandarin
H1chr4	1088	7200000-7300000	198534	108962	2924	3886	54514	mandarin
H1chr4	1089	7300000-7400000	187298	118516	1494	2538	48862	mandarin
H1chr4	1090	7400000-7500000	196788	118544	1910	6434	39834	mandarin
H1chr4	1091	7500000-7600000	196744	84846	11224	6380	27578	mandarin
H1chr4	1092	7600000-7700000	197468	110842	2920	3784	55034	mandarin
H1chr4	1093	7700000-7800000	170698	88772	3598	5002	29762	mandarin
H1chr4	1094	7800000-7900000	170256	82054	2326	2006	48284	mandarin
H1chr4	1095	7900000-8000000	196184	114288	2414	3206	52332	mandarin
H1chr4	1096	8000000-8100000	195124	103234	3582	2398	61424	mandarin
H1chr4	1097	8100000-8200000	196124	90534	1840	5458	65294	mandarin
H1chr4	1098	8200000-8300000	199458	119260	1036	1140	60464	mandarin
H1chr4	1099	8300000-8400000	195068	124046	1934	2036	42576	mandarin
H1chr4	1100	8400000-8500000	178856	91270	3248	2650	54532	mandarin
H1chr4	1101	8500000-8600000	198034	120848	2538	2286	47214	mandarin
H1chr4	1102	8600000-8700000	194786	116406	1884	3832	50308	mandarin
H1chr4	1103	8700000-8800000	193380	97730	2682	4124	56158	mandarin
H1chr4	1104	8800000-8900000	131347	70494	654	826	42596	mandarin
H1chr4	1105	8900000-9000000	197094	102046	3358	2536	56918	mandarin
H1chr4	1106	9000000-9100000	195714	86398	5554	3778	59880	mandarin
H1chr4	1107	9100000-9200000	196204	95062	1722	4830	70338	mandarin
H1chr4	1108	9200000-9300000	198738	127536	742	938	53770	mandarin
H1chr4	1109	9300000-9400000	196846	126344	1208	1324	48708	mandarin
H1chr4	1110	9400000-9500000	193408	123574	866	768	57850	mandarin
H1chr4	1111	9500000-9600000	197602	117574	1904	2458	49512	mandarin
H1chr4	1112	9600000-9700000	195232	87644	5726	6376	61492	mandarin
H1chr4	1113	9700000-9800000	198206	98118	3470	5030	56674	mandarin
H1chr4	1114	9800000-9900000	198600	125444	1412	3188	43324	mandarin
H1chr4	1115	9900000-10000000	198982	124868	1062	1732	54398	mandarin
H1chr4	1116	10000000-10100000	193068	94270	866	898	79348	mandarin
H1chr4	1117	10100000-10200000	193094	116516	2082	2612	48666	mandarin
H1chr4	1118	10200000-10300000	194006	106610	1684	4032	55562	mandarin
H1chr4	1119	10300000-10400000	140966	62890	2486	2554	41274	mandarin
H1chr4	1120	10400000-10500000	197160	125436	1942	1826	48530	mandarin
H1chr4	1121	10500000-10600000	183832	100024	2378	2302	54318	mandarin
H1chr4	1122	10600000-10700000	192078	103926	2354	2648	59142	mandarin
H1chr4	1123	10700000-10800000	176690	101378	3440	2870	43830	mandarin
H1chr4	1124	10800000-10900000	193328	122232	2474	2800	45166	mandarin
H1chr4	1125	10900000-11000000	193078	112210	2754	2032	52938	mandarin
H1chr4	1126	11000000-11100000	195966	107616	4644	2260	48538	mandarin
H1chr4	1127	11100000-11200000	196680	117400	2950	2692	47800	mandarin
H1chr4	1128	11200000-11300000	176904	100182	1572	1686	48474	mandarin
H1chr4	1129	11300000-11400000	190840	111270	2438	6636	42652	mandarin
H1chr4	1130	11400000-11500000	191226	112024	6676	2404	43864	mandarin
H1chr4	1131	11500000-11600000	193550	114902	2790	3070	48276	mandarin
H1chr4	1132	11600000-11700000	199464	131814	2152	2588	37666	mandarin
H1chr4	1133	11700000-11800000	195440	117204	2086	3524	40508	mandarin
H1chr4	1134	11800000-11900000	193220	115178	1678	2832	50266	mandarin
H1chr4	1135	11900000-12000000	194068	128030	2754	2260	38812	mandarin
H1chr4	1136	12000000-12100000	195250	90538	4000	1508	71500	mandarin
H1chr4	1137	12100000-12200000	197566	124818	4860	3794	40640	mandarin
H1chr4	1138	12200000-12300000	178246	102956	3146	2724	45892	mandarin
H1chr4	1139	12300000-12400000	179612	102886	3602	3496	42182	mandarin
H1chr4	1140	12400000-12500000	187690	107786	2506	2854	49014	mandarin
H1chr4	1141	12500000-12600000	194712	134236	3808	2264	34816	mandarin
H1chr4	1142	12600000-12700000	177862	103162	2184	2840	46696	mandarin
H1chr4	1143	12700000-12800000	139628	61730	2236	1588	49404	mandarin
H1chr4	1144	12800000-12900000	173432	79738	1678	2748	57744	mandarin
H1chr4	1145	12900000-13000000	184964	87162	3750	4206	56022	mandarin
H1chr4	1146	13000000-13100000	193916	98024	1586	3626	70376	mandarin
H1chr4	1147	13100000-13200000	151524	84780	1598	4044	37292	mandarin
H1chr4	1148	13200000-13300000	190996	104510	936	3268	54456	mandarin
H1chr4	1149	13300000-13400000	162122	72500	2502	3292	49532	mandarin
H1chr4	1150	13400000-13500000	174484	82500	4938	3860	49204	mandarin
H1chr4	1151	13500000-13600000	192232	120866	2144	2048	46756	mandarin
H1chr4	1152	13600000-13700000	197676	121708	1882	3454	47344	mandarin
H1chr4	1153	13700000-13800000	192512	99942	1628	2424	62770	mandarin
H1chr4	1154	13800000-13900000	196924	120410	2148	1546	53976	mandarin
H1chr4	1155	13900000-14000000	177682	100584	3332	1908	51210	mandarin
H1chr4	1156	14000000-14100000	198036	122650	870	1450	59000	mandarin
H1chr4	1157	14100000-14200000	197024	124862	1402	1040	54830	mandarin
H1chr4	1158	14200000-14300000	198136	114020	972	1236	67386	mandarin
H1chr4	1159	14300000-14400000	178178	92564	2228	1670	64948	mandarin
H1chr4	1160	14400000-14500000	177518	83220	1658	3068	44398	mandarin
H1chr4	1161	14500000-14600000	194686	124956	2396	2836	43474	mandarin
H1chr4	1162	14600000-14700000	198200	118350	1586	1924	52922	mandarin
H1chr4	1163	14700000-14800000	197316	126940	2234	4694	38670	mandarin
H1chr4	1164	14800000-14900000	191636	102516	1046	1552	71818	mandarin
H1chr4	1165	14900000-15000000	174232	81976	1392	880	67180	mandarin
H1chr4	1166	15000000-15100000	195966	103256	1128	2092	67862	mandarin
H1chr4	1167	15100000-15200000	195114	81450	3530	5144	68350	mandarin
H1chr4	1168	15200000-15300000	194170	99322	2430	2704	61462	mandarin
H1chr4	1169	15300000-15400000	198980	129320	2058	2278	47718	mandarin
H1chr4	1170	15400000-15500000	196168	106688	1572	2490	59456	mandarin
H1chr4	1171	15500000-15600000	192868	90696	2224	2018	49684	mandarin
H1chr4	1172	15600000-15700000	198018	134168	1754	2618	38448	mandarin
H1chr4	1173	15700000-15800000	195948	119092	3590	4366	39426	mandarin
H1chr4	1174	15800000-15900000	186428	89706	4974	6368	42188	mandarin
H1chr4	1175	15900000-16000000	187528	103078	4194	4946	44380	mandarin
H1chr4	1176	16000000-16100000	163192	85498	3012	2544	48034	mandarin
H1chr4	1177	16100000-16200000	195962	68072	1838	2546	86892	mandarin
H1chr4	1178	16200000-16300000	189462	84430	2186	2408	75050	mandarin
H1chr4	1179	16300000-16400000	187344	95316	3918	2828	57022	mandarin
H1chr4	1180	16400000-16500000	197948	111926	2984	3326	59546	mandarin
H1chr4	1181	16500000-16600000	195926	82154	532	1334	101480	mandarin
H1chr4	1182	16600000-16700000	196054	127902	556	654	58494	mandarin
H1chr4	1183	16700000-16800000	196692	127270	510	518	58276	mandarin
H1chr4	1184	16800000-16900000	198208	131418	2238	2222	43284	mandarin
H1chr4	1185	16900000-17000000	176000	92346	1774	1914	41482	mandarin
H1chr4	1186	17000000-17100000	198604	127084	2044	2296	47020	mandarin
H1chr4	1187	17100000-17200000	192938	94974	1154	2424	62648	mandarin
H1chr4	1188	17200000-17300000	196868	103770	2062	1780	63974	mandarin
H1chr4	1189	17300000-17400000	198458	112400	1252	912	64790	mandarin
H1chr4	1190	17400000-17500000	195954	116928	2358	1670	55742	mandarin
H1chr4	1191	17500000-17600000	179618	80684	1242	468	88122	mandarin
H1chr4	1192	17600000-17700000	188998	88170	448	38	95252	mandarin
H1chr4	1193	17700000-17800000	177458	79950	476	112	91898	mandarin
H1chr4	1194	17800000-17900000	195426	125088	750	900	55830	mandarin
H1chr4	1195	17900000-18000000	184396	84858	752	1072	73400	mandarin
H1chr4	1196	18000000-18100000	198484	110486	810	852	72264	mandarin
H1chr4	1197	18100000-18200000	195292	130410	2208	1264	48896	mandarin
H1chr4	1198	18200000-18300000	198230	111212	2356	7408	54334	mandarin
H1chr4	1199	18300000-18400000	187348	83286	1452	1254	88160	mandarin
H1chr4	1200	18400000-18500000	158140	71672	448	566	74408	mandarin
H1chr4	1201	18500000-18600000	195532	112186	2358	1398	60070	mandarin
H1chr4	1202	18600000-18700000	191096	126484	856	1560	50126	mandarin
H1chr4	1203	18700000-18800000	191388	122830	1414	2286	47494	mandarin
H1chr4	1204	18800000-18900000	195020	111196	7670	2466	43718	mandarin
H1chr4	1205	18900000-19000000	196286	98102	6352	3018	50172	mandarin
H1chr4	1206	19000000-19100000	198890	116692	1326	2546	52990	mandarin
H1chr4	1207	19100000-19200000	195294	124970	1264	2022	47140	mandarin
H1chr4	1208	19200000-19300000	195400	104264	1158	1392	68058	mandarin
H1chr4	1209	19300000-19400000	199512	134782	706	1442	46396	mandarin
H1chr4	1210	19400000-19500000	191602	113250	1542	1846	54012	mandarin
H1chr4	1211	19500000-19600000	193786	120912	1632	928	55312	mandarin
H1chr4	1212	19600000-19700000	196662	120216	972	1620	58878	mandarin
H1chr4	1213	19700000-19800000	194148	120148	978	1422	61522	mandarin
H1chr4	1214	19800000-19900000	194902	97740	1590	1170	81646	mandarin
H1chr4	1215	19900000-20000000	196888	118882	1248	2900	58168	mandarin
H1chr4	1216	20000000-20100000	173046	88024	196	388	78744	mandarin
H1chr4	1217	20100000-20200000	193214	123658	586	274	61668	mandarin
H1chr4	1218	20200000-20300000	193506	127272	664	1376	53234	mandarin
H1chr4	1219	20300000-20400000	164242	93720	464	524	64570	mandarin
H1chr4	1220	20400000-20500000	199038	130798	930	1442	50610	mandarin
H1chr4	1221	20500000-20600000	193350	109648	3042	2580	53948	mandarin
H1chr4	1222	20600000-20700000	189994	83286	7856	7994	29436	mandarin
H1chr4	1223	20700000-20800000	197904	72008	3362	5504	71406	mandarin
H1chr4	1224	20800000-20900000	197394	86160	1544	4042	76526	mandarin
H1chr4	1225	20900000-21000000	189238	118330	3808	2758	34298	mandarin
H1chr4	1226	21000000-21100000	185626	69406	12054	8674	31652	mandarin
H1chr4	1227	21100000-21200000	165910	70660	2848	2090	71526	mandarin
H1chr4	1228	21200000-21300000	172024	95750	668	952	62722	mandarin
H1chr4	1229	21300000-21400000	198144	134574	852	1122	46558	mandarin
H1chr4	1230	21400000-21500000	193696	100076	1152	1440	72212	mandarin
H1chr4	1231	21500000-21600000	197062	105248	5656	30082	23672	Undetermined
H1chr4	1232	21600000-21700000	188664	70936	840	1038	98656	mandarin
H1chr4	1233	21700000-21800000	195390	125902	1088	878	56050	mandarin
H1chr4	1234	21800000-21900000	191230	97422	3458	3720	46386	mandarin
H1chr4	1235	21900000-22000000	195556	114932	1758	4720	45570	mandarin
H1chr4	1236	22000000-22100000	195974	117214	5222	3254	33746	mandarin
H1chr4	1237	22100000-22200000	165950	71414	3594	2860	44366	mandarin
H1chr4	1238	22200000-22300000	191792	63914	902	2362	106182	mandarin
H1chr4	1239	22300000-22400000	198390	122490	1660	2646	53918	mandarin
H1chr4	1240	22400000-22500000	184874	110560	2628	1928	48498	mandarin
H1chr4	1241	22500000-22600000	172170	92162	1094	3188	46904	mandarin
H1chr4	1242	22600000-22700000	188782	99192	1320	1846	63614	mandarin
H1chr4	1243	22700000-22800000	183544	65016	1118	1058	100100	mandarin
H1chr4	1244	22800000-22900000	190746	125194	1634	1516	45798	mandarin
H1chr4	1245	22900000-23000000	186032	90968	1406	2332	69532	mandarin
H1chr4	1246	23000000-23100000	187346	109812	3492	4000	38948	mandarin
H1chr4	1247	23100000-23200000	197908	133356	2358	1342	44424	mandarin
H1chr4	1248	23200000-23300000	196720	122898	1306	1816	49540	mandarin
H1chr4	1249	23300000-23400000	198848	137938	1810	1704	37712	mandarin
H1chr4	1250	23400000-23500000	199350	136124	1196	1834	44026	mandarin
H1chr4	1251	23500000-23600000	198362	123150	1616	1800	51786	mandarin
H1chr4	1252	23600000-23700000	198662	117906	1054	1426	57830	mandarin
H1chr4	1253	23700000-23800000	193498	121278	2146	2280	45968	mandarin
H1chr4	1254	23800000-23900000	199116	122238	2068	2782	53110	mandarin
H1chr4	1255	23900000-24000000	196408	102374	2630	3000	60630	mandarin
H1chr4	1256	24000000-24100000	198844	140162	1248	4382	38224	mandarin
H1chr4	1257	24100000-24200000	196142	116954	3690	3654	43408	mandarin
H1chr4	1258	24200000-24300000	197754	134496	722	1116	46272	mandarin
H1chr4	1259	24300000-24400000	197252	137324	824	938	46756	mandarin
H1chr4	1260	24400000-24500000	166856	93484	4010	4338	33796	mandarin
H1chr4	1261	24500000-24600000	189096	99284	1130	3358	59752	mandarin
H1chr4	1262	24600000-24700000	197912	124754	2508	3558	34814	mandarin
H1chr4	1263	24700000-24800000	195242	131260	1896	2650	35822	mandarin
H1chr4	1264	24800000-24900000	199352	146222	594	912	39318	mandarin
H1chr4	1265	24900000-25000000	198092	127182	3850	1534	48274	mandarin
H1chr4	1266	25000000-25100000	199034	128564	1028	1474	48174	mandarin
H1chr4	1267	25100000-25200000	198966	137562	922	1288	43778	mandarin
H1chr4	1268	25200000-25300000	197068	110666	1668	2434	48930	mandarin
H1chr4	1269	25300000-25400000	199372	140036	662	1624	43446	mandarin
H1chr4	1270	25400000-25500000	190340	133872	940	1452	40396	mandarin
H1chr4	1271	25500000-25600000	198510	140510	1850	2626	34216	mandarin
H1chr4	1272	25600000-25700000	194244	109040	1974	2086	52596	mandarin
H1chr4	1273	25700000-25800000	197044	118124	1816	2748	51430	mandarin
H1chr4	1274	25800000-25900000	199398	142854	640	1078	41438	mandarin
H1chr4	1275	25900000-26000000	199334	121910	704	654	66966	mandarin
H1chr4	1276	26000000-26100000	195070	114172	450	1002	65606	mandarin
H1chr4	1277	26100000-26200000	197228	132056	744	1132	55030	mandarin
H1chr4	1278	26200000-26300000	197362	139982	472	884	47750	mandarin
H1chr4	1279	26300000-26400000	199444	133810	1134	620	50892	mandarin
H1chr4	1280	26400000-26500000	199132	131428	584	634	54618	mandarin
H1chr4	1281	26500000-26600000	193428	118780	602	498	67188	mandarin
H1chr4	1282	26600000-26700000	193470	118924	416	850	58266	mandarin
H1chr4	1283	26700000-26800000	199552	142282	776	2250	41242	mandarin
H1chr4	1284	26800000-26900000	188864	128372	1172	2188	46240	mandarin
H1chr4	1285	26900000-27000000	199460	122778	2026	2866	47188	mandarin
H1chr4	1286	27000000-27100000	199536	126564	1082	1804	51868	mandarin
H1chr4	1287	27100000-27200000	198544	123394	2032	2742	52382	mandarin
H1chr4	1288	27200000-27300000	199630	147724	852	1274	35516	mandarin
H1chr4	1289	27300000-27400000	198472	117708	2724	2734	46084	mandarin
H1chr4	1290	27400000-27500000	198654	133704	1514	2462	42156	mandarin
H1chr4	1291	27500000-27600000	199126	125774	1706	1988	46764	mandarin
H1chr4	1292	27600000-27700000	195646	121954	2000	3362	41796	mandarin
H1chr4	1293	27700000-27800000	198434	120088	1740	2058	55786	mandarin
H1chr4	1294	27800000-27900000	198712	130650	1518	2138	43718	mandarin
H1chr4	1295	27900000-28000000	160176	90560	2124	2652	20300	mandarin
H1chr4	1296	28000000-28100000	199146	118320	1036	1876	33274	mandarin
H1chr4	1297	28100000-28200000	192276	131122	1340	4362	40924	mandarin
H1chr4	1298	28200000-28300000	199328	132502	1604	2040	42528	mandarin
H1chr4	1299	28300000-28400000	199504	136452	1172	1048	46320	mandarin
H1chr4	1300	28400000-28500000	196640	133562	1438	2504	41048	mandarin
H1chr4	1301	28500000-28600000	197922	127264	2328	1532	48456	mandarin
H1chr4	1302	28600000-28700000	199330	133112	1158	1372	42776	mandarin
H1chr4	1303	28700000-28800000	199572	142746	1800	1950	37920	mandarin
H1chr4	1304	28800000-28900000	192590	111678	1392	1922	56524	mandarin
H1chr4	1305	28900000-29000000	199210	139560	1374	2010	38890	mandarin
H1chr4	1306	29000000-29100000	198812	130398	1578	1898	44664	mandarin
H1chr4	1307	29100000-29200000	197816	131964	2774	2352	41400	mandarin
H1chr4	1308	29200000-29300000	198010	131902	818	1632	49322	mandarin
H1chr4	1309	29300000-29400000	198742	131608	802	1518	50514	mandarin
H1chr4	1310	29400000-29500000	180198	101920	5322	2440	41712	mandarin
H1chr4	1311	29500000-29536771	1398	234	78	28	0	citron
H1chr5	1312	0-100000	126614	54236	2710	3534	28272	mandarin
H1chr5	1313	100000-200000	199332	118938	1150	1828	52234	mandarin
H1chr5	1314	200000-300000	198352	132450	916	1050	49772	mandarin
H1chr5	1315	300000-400000	193860	130836	1214	2932	41340	mandarin
H1chr5	1316	400000-500000	199212	138394	732	806	45640	mandarin
H1chr5	1317	500000-600000	199118	118818	1922	1962	42396	mandarin
H1chr5	1318	600000-700000	198152	119482	2010	1620	50732	mandarin
H1chr5	1319	700000-800000	198994	142738	1438	2096	34912	mandarin
H1chr5	1320	800000-900000	199536	134830	1010	2256	39802	mandarin
H1chr5	1321	900000-1000000	198374	121522	1320	2350	50878	mandarin
H1chr5	1322	1000000-1100000	198684	130438	1052	2056	45920	mandarin
H1chr5	1323	1100000-1200000	199072	130116	700	1076	51914	mandarin
H1chr5	1324	1200000-1300000	199504	136812	904	668	47612	mandarin
H1chr5	1325	1300000-1400000	199444	136862	946	1082	45104	mandarin
H1chr5	1326	1400000-1500000	199842	142076	412	730	45846	mandarin
H1chr5	1327	1500000-1600000	198510	133416	492	864	53190	mandarin
H1chr5	1328	1600000-1700000	199056	127620	478	578	60862	mandarin
H1chr5	1329	1700000-1800000	199406	142138	386	518	47562	mandarin
H1chr5	1330	1800000-1900000	198378	136706	342	186	56122	mandarin
H1chr5	1331	1900000-2000000	199100	137174	450	792	50086	mandarin
H1chr5	1332	2000000-2100000	199186	135114	554	954	42750	mandarin
H1chr5	1333	2100000-2200000	199454	132678	1322	2618	41748	mandarin
H1chr5	1334	2200000-2300000	198560	140626	2094	2666	33230	mandarin
H1chr5	1335	2300000-2400000	199268	132096	1024	1694	44940	mandarin
H1chr5	1336	2400000-2500000	199590	143318	988	1296	41008	mandarin
H1chr5	1337	2500000-2600000	198670	116200	988	1000	49588	mandarin
H1chr5	1338	2600000-2700000	199470	133802	588	1240	48388	mandarin
H1chr5	1339	2700000-2800000	198476	126010	464	572	58762	mandarin
H1chr5	1340	2800000-2900000	182310	116214	1260	1534	45370	mandarin
H1chr5	1341	2900000-3000000	188960	131128	932	1638	38052	mandarin
H1chr5	1342	3000000-3100000	196424	130090	1644	1950	36468	mandarin
H1chr5	1343	3100000-3200000	199562	138448	946	804	43652	mandarin
H1chr5	1344	3200000-3300000	196032	114974	1672	1992	47322	mandarin
H1chr5	1345	3300000-3400000	198742	126338	1126	2562	46406	mandarin
H1chr5	1346	3400000-3500000	198724	125142	812	1174	55540	mandarin
H1chr5	1347	3500000-3600000	197506	128038	1006	1544	48652	mandarin
H1chr5	1348	3600000-3700000	190722	126764	910	1372	45268	mandarin
H1chr5	1349	3700000-3800000	199406	141770	306	1014	44242	mandarin
H1chr5	1350	3800000-3900000	197505	130892	530	820	50248	mandarin
H1chr5	1351	3900000-4000000	199754	148194	658	1890	33688	mandarin
H1chr5	1352	4000000-4100000	199594	124712	1000	1242	49504	mandarin
H1chr5	1353	4100000-4200000	197020	91802	828	712	88406	mandarin
H1chr5	1354	4200000-4300000	199222	121372	1112	1356	53506	mandarin
H1chr5	1355	4300000-4400000	198082	130710	740	948	48372	mandarin
H1chr5	1356	4400000-4500000	186850	106114	1944	2646	46884	mandarin
H1chr5	1357	4500000-4600000	198490	121818	892	1156	46530	mandarin
H1chr5	1358	4600000-4700000	197960	131014	420	850	45120	mandarin
H1chr5	1359	4700000-4800000	196840	121866	1870	1986	50246	mandarin
H1chr5	1360	4800000-4900000	197324	113134	1128	2310	57308	mandarin
H1chr5	1361	4900000-5000000	194080	115270	1988	1552	52168	mandarin
H1chr5	1362	5000000-5100000	199442	134144	1590	5140	30052	mandarin
H1chr5	1363	5100000-5200000	190174	102426	1392	1732	46654	mandarin
H1chr5	1364	5200000-5300000	192708	110184	1936	2166	51634	mandarin
H1chr5	1365	5300000-5400000	199208	125516	848	1216	55580	mandarin
H1chr5	1366	5400000-5500000	199286	127202	1108	2182	44672	mandarin
H1chr5	1367	5500000-5600000	198990	122018	1820	2426	48624	mandarin
H1chr5	1368	5600000-5700000	199358	137168	886	1364	44334	mandarin
H1chr5	1369	5700000-5800000	198550	130894	578	950	50000	mandarin
H1chr5	1370	5800000-5900000	194036	132250	528	1376	44868	mandarin
H1chr5	1371	5900000-6000000	198832	128432	1008	3046	47416	mandarin
H1chr5	1372	6000000-6100000	188156	113128	1290	3346	45832	mandarin
H1chr5	1373	6100000-6200000	198354	132974	1442	6276	37706	mandarin
H1chr5	1374	6200000-6300000	197464	133246	1470	1390	42810	mandarin
H1chr5	1375	6300000-6400000	197926	120270	1976	3054	51876	mandarin
H1chr5	1376	6400000-6500000	198678	135938	972	912	45716	mandarin
H1chr5	1377	6500000-6600000	199390	132466	1340	2102	41820	mandarin
H1chr5	1378	6600000-6700000	198040	127178	1366	1276	47098	mandarin
H1chr5	1379	6700000-6800000	199392	122786	1238	2386	51216	mandarin
H1chr5	1380	6800000-6900000	199066	122510	2750	2340	40118	mandarin
H1chr5	1381	6900000-7000000	199540	145266	1058	2468	37158	mandarin
H1chr5	1382	7000000-7100000	198348	137278	806	1128	46018	mandarin
H1chr5	1383	7100000-7200000	198992	132016	1034	1052	50602	mandarin
H1chr5	1384	7200000-7300000	199738	131236	1124	768	51930	mandarin
H1chr5	1385	7300000-7400000	199646	126738	836	1182	56496	mandarin
H1chr5	1386	7400000-7500000	198474	129786	796	790	42574	mandarin
H1chr5	1387	7500000-7600000	198636	138756	880	1620	39946	mandarin
H1chr5	1388	7600000-7700000	198306	119074	1514	2364	52960	mandarin
H1chr5	1389	7700000-7800000	199446	142222	736	862	41596	mandarin
H1chr5	1390	7800000-7900000	198546	140650	1670	1602	35946	mandarin
H1chr5	1391	7900000-8000000	199502	128710	1550	2230	50040	mandarin
H1chr5	1392	8000000-8100000	186198	123184	1068	2840	41976	mandarin
H1chr5	1393	8100000-8200000	199416	129468	2008	2780	35508	mandarin
H1chr5	1394	8200000-8300000	199120	133980	1036	1826	44778	mandarin
H1chr5	1395	8300000-8400000	197344	130454	1262	1500	41636	mandarin
H1chr5	1396	8400000-8500000	197930	122720	1016	1246	56088	mandarin
H1chr5	1397	8500000-8600000	198896	128162	1134	1908	48792	mandarin
H1chr5	1398	8600000-8700000	199534	137048	654	1322	45202	mandarin
H1chr5	1399	8700000-8800000	197820	121760	1018	1420	56212	mandarin
H1chr5	1400	8800000-8900000	199474	130190	1654	1646	43746	mandarin
H1chr5	1401	8900000-9000000	199468	135010	1680	2174	37890	mandarin
H1chr5	1402	9000000-9100000	194268	120322	836	1214	54990	mandarin
H1chr5	1403	9100000-9200000	194416	111340	3394	2290	51268	mandarin
H1chr5	1404	9200000-9300000	199394	133030	1082	566	50110	mandarin
H1chr5	1405	9300000-9400000	199294	133676	344	640	46198	mandarin
H1chr5	1406	9400000-9500000	197844	107374	830	1164	69090	mandarin
H1chr5	1407	9500000-9600000	198288	122094	1500	5246	46190	mandarin
H1chr5	1408	9600000-9700000	199540	135512	1134	1228	46294	mandarin
H1chr5	1409	9700000-9800000	198520	134348	2008	1928	37456	mandarin
H1chr5	1410	9800000-9900000	195672	132728	1900	2056	41264	mandarin
H1chr5	1411	9900000-10000000	193064	54222	1344	2530	92758	mandarin
H1chr5	1412	10000000-10100000	171592	83460	4522	7004	35022	mandarin
H1chr5	1413	10100000-10200000	199308	138172	570	1282	48330	mandarin
H1chr5	1414	10200000-10300000	159942	79000	1626	6484	42692	mandarin
H1chr5	1415	10300000-10400000	168616	71706	3102	4142	62222	mandarin
H1chr5	1416	10400000-10500000	192424	112680	2664	2930	48530	mandarin
H1chr5	1417	10500000-10600000	185570	113732	3870	9206	19102	mandarin
H1chr5	1418	10600000-10700000	173254	96692	5240	5800	30360	mandarin
H1chr5	1419	10700000-10800000	197614	148730	1400	2362	31024	mandarin
H1chr5	1420	10800000-10900000	195464	119742	1324	1184	56000	mandarin
H1chr5	1421	10900000-11000000	198930	135252	648	1264	49582	mandarin
H1chr5	1422	11000000-11100000	197680	125636	1724	2864	45472	mandarin
H1chr5	1423	11100000-11200000	198288	123050	1858	2052	48328	mandarin
H1chr5	1424	11200000-11300000	190656	103512	2310	2196	55538	mandarin
H1chr5	1425	11300000-11400000	194696	90936	1798	1136	76524	mandarin
H1chr5	1426	11400000-11500000	198512	129162	1044	2246	44786	mandarin
H1chr5	1427	11500000-11600000	198556	128614	1786	2262	40364	mandarin
H1chr5	1428	11600000-11700000	199024	128738	1862	2244	45174	mandarin
H1chr5	1429	11700000-11800000	196472	116850	2716	2676	47588	mandarin
H1chr5	1430	11800000-11900000	199458	132000	792	1258	50940	mandarin
H1chr5	1431	11900000-12000000	197104	134478	2682	3388	32418	mandarin
H1chr5	1432	12000000-12100000	198614	121986	838	1770	57664	mandarin
H1chr5	1433	12100000-12200000	176816	111376	278	314	53762	mandarin
H1chr5	1434	12200000-12300000	196338	135668	926	852	47948	mandarin
H1chr5	1435	12300000-12400000	178946	113642	3124	10586	19698	Undetermined
H1chr5	1436	12400000-12500000	187994	53728	6826	7688	31276	mandarin
H1chr5	1437	12500000-12600000	178344	50542	5242	12794	24428	Undetermined
H1chr5	1438	12600000-12700000	193230	93146	6306	9410	32894	mandarin
H1chr5	1439	12700000-12800000	195386	113766	4334	3680	45794	mandarin
H1chr5	1440	12800000-12900000	193452	90888	2408	3396	48156	mandarin
H1chr5	1441	12900000-13000000	194350	118600	1170	3086	54152	mandarin
H1chr5	1442	13000000-13100000	199288	119158	1614	2088	49206	mandarin
H1chr5	1443	13100000-13200000	195628	88950	810	768	83216	mandarin
H1chr5	1444	13200000-13300000	193108	88704	3288	1486	72248	mandarin
H1chr5	1445	13300000-13400000	198212	100602	2126	2950	63734	mandarin
H1chr5	1446	13400000-13500000	188218	82938	7784	4876	48296	mandarin
H1chr5	1447	13500000-13600000	197704	82786	2792	2744	88494	mandarin
H1chr5	1448	13600000-13700000	198250	117236	1312	2710	54130	mandarin
H1chr5	1449	13700000-13800000	188994	117336	2156	3056	38412	mandarin
H1chr5	1450	13800000-13900000	189764	57134	3942	4064	32556	mandarin
H1chr5	1451	13900000-14000000	195670	98660	3444	6678	44986	mandarin
H1chr5	1452	14000000-14100000	197140	106026	11002	10310	23520	mandarin
H1chr5	1453	14100000-14200000	196922	112602	9266	3184	33274	mandarin
H1chr5	1454	14200000-14300000	181730	87064	2060	5956	62820	mandarin
H1chr5	1455	14300000-14400000	192932	55852	9782	8042	22752	mandarin
H1chr5	1456	14400000-14500000	193252	124174	4992	2870	30634	mandarin
H1chr5	1457	14500000-14600000	197274	115748	8870	4370	30256	mandarin
H1chr5	1458	14600000-14700000	194384	91742	10124	11126	25650	mandarin
H1chr5	1459	14700000-14800000	194472	95990	580	1640	82282	mandarin
H1chr5	1460	14800000-14900000	192378	136096	400	486	51942	mandarin
H1chr5	1461	14900000-15000000	196272	92156	4278	6090	54132	mandarin
H1chr5	1462	15000000-15100000	188632	71962	24106	13286	21860	Undetermined
H1chr5	1463	15100000-15200000	194642	88358	42742	2342	38628	Undetermined
H1chr5	1464	15200000-15300000	190744	132650	1412	1788	29398	mandarin
H1chr5	1465	15300000-15400000	150880	87240	4998	4130	33676	mandarin
H1chr5	1466	15400000-15500000	177456	66472	2382	16282	17140	Undetermined
H1chr5	1467	15500000-15600000	197554	102990	4902	6968	36576	mandarin
H1chr5	1468	15600000-15700000	192264	106162	1616	3360	47616	mandarin
H1chr5	1469	15700000-15800000	189342	106336	3906	2262	49968	mandarin
H1chr5	1470	15800000-15900000	186654	87424	5738	7738	19954	mandarin
H1chr5	1471	15900000-16000000	185272	68374	3610	2568	50100	mandarin
H1chr5	1472	16000000-16100000	161154	69898	4082	6056	25732	mandarin
H1chr5	1473	16100000-16200000	146344	56686	1980	3146	41892	mandarin
H1chr5	1474	16200000-16300000	196958	100006	13786	5708	38550	mandarin
H1chr5	1475	16300000-16400000	179094	80902	4416	11304	19076	Undetermined
H1chr5	1476	16400000-16500000	166904	89788	3218	7388	24630	mandarin
H1chr5	1477	16500000-16600000	197104	130994	850	1444	54108	mandarin
H1chr5	1478	16600000-16700000	174922	103592	4178	8348	25360	mandarin
H1chr5	1479	16700000-16800000	156986	107974	1404	4316	20004	mandarin
H1chr5	1480	16800000-16900000	134014	35396	1868	3830	40066	mandarin
H1chr5	1481	16900000-17000000	197540	136762	1314	5712	28488	mandarin
H1chr5	1482	17000000-17100000	194270	86996	856	8052	29516	mandarin
H1chr5	1483	17100000-17200000	198634	84710	904	2522	37508	mandarin
H1chr5	1484	17200000-17300000	196458	101222	1138	1598	77068	mandarin
H1chr5	1485	17300000-17400000	193076	117048	1318	772	64308	mandarin
H1chr5	1486	17400000-17500000	186688	99650	1290	2514	52310	mandarin
H1chr5	1487	17500000-17600000	99934	57124	2022	922	23712	mandarin
H1chr5	1488	17600000-17700000	193492	85946	2434	2170	78280	mandarin
H1chr5	1489	17700000-17800000	198510	120472	1444	1668	61060	mandarin
H1chr5	1490	17800000-17900000	197120	123120	1386	2900	47072	mandarin
H1chr5	1491	17900000-18000000	198376	130294	3206	2856	35022	mandarin
H1chr5	1492	18000000-18100000	168646	72608	1754	12724	24268	Undetermined
H1chr5	1493	18100000-18200000	189960	84742	4534	8778	31276	mandarin
H1chr5	1494	18200000-18300000	173786	100644	2282	2714	41056	mandarin
H1chr5	1495	18300000-18400000	169830	79346	852	1108	63190	mandarin
H1chr5	1496	18400000-18500000	174892	92722	874	1212	65118	mandarin
H1chr5	1497	18500000-18600000	179668	95240	1814	3006	49180	mandarin
H1chr5	1498	18600000-18700000	196338	127256	1930	2518	43268	mandarin
H1chr5	1499	18700000-18800000	184936	81900	3138	1954	64180	mandarin
H1chr5	1500	18800000-18900000	167718	52932	7120	8750	39992	mandarin
H1chr5	1501	18900000-19000000	166392	37872	12288	32766	17056	Undetermined
H1chr5	1502	19000000-19100000	192454	68658	25456	7008	36514	Undetermined
H1chr5	1503	19100000-19200000	199634	117080	1106	1262	63254	mandarin
H1chr5	1504	19200000-19300000	195234	100614	1440	2740	65300	mandarin
H1chr5	1505	19300000-19400000	195682	90676	1768	1700	83516	mandarin
H1chr5	1506	19400000-19500000	185372	86020	638	884	84964	mandarin
H1chr5	1507	19500000-19600000	181328	107876	620	1218	61036	mandarin
H1chr5	1508	19600000-19700000	198384	104536	1304	1868	68694	mandarin
H1chr5	1509	19700000-19800000	194696	76162	4154	27286	27784	Undetermined
H1chr5	1510	19800000-19900000	187630	82392	6972	22662	14290	Undetermined
H1chr5	1511	19900000-20000000	189558	152932	2358	10344	9432	Undetermined
H1chr5	1512	20000000-20100000	188598	113300	2540	3028	46882	mandarin
H1chr5	1513	20100000-20200000	197504	79092	16900	6638	33614	Undetermined
H1chr5	1514	20200000-20300000	184996	67886	35842	3936	15300	citron
H1chr5	1515	20300000-20400000	192596	57598	22436	8146	15050	Undetermined
H1chr5	1516	20400000-20500000	191076	43164	8362	9874	19848	mandarin
H1chr5	1517	20500000-20600000	191094	50088	9760	4676	66666	mandarin
H1chr5	1518	20600000-20700000	182172	38734	12614	7456	31264	mandarin
H1chr5	1519	20700000-20800000	186556	42660	8078	5546	63968	mandarin
H1chr5	1520	20800000-20900000	171978	44362	4192	6654	51588	mandarin
H1chr5	1521	20900000-21000000	192778	37084	1596	2264	93762	mandarin
H1chr5	1522	21000000-21100000	184388	28902	9580	5978	25120	mandarin
H1chr5	1523	21100000-21200000	184912	51154	5884	8366	54572	mandarin
H1chr5	1524	21200000-21300000	190098	35964	12994	13062	33706	mandarin
H1chr5	1525	21300000-21400000	186366	65418	5574	23126	40314	Undetermined
H1chr5	1526	21400000-21500000	192408	40090	606	1170	106288	mandarin
H1chr5	1527	21500000-21600000	174352	27186	3274	6002	52746	mandarin
H1chr5	1528	21600000-21700000	184052	52336	6226	1976	83098	mandarin
H1chr5	1529	21700000-21800000	191034	63298	350	276	100598	mandarin
H1chr5	1530	21800000-21900000	193344	132014	584	2014	46296	mandarin
H1chr5	1531	21900000-22000000	197812	110830	2080	8458	33580	mandarin
H1chr5	1532	22000000-22100000	194784	81066	5428	4588	29544	mandarin
H1chr5	1533	22100000-22200000	189934	109212	1748	1798	54030	mandarin
H1chr5	1534	22200000-22300000	198194	114200	2638	3198	55040	mandarin
H1chr5	1535	22300000-22400000	192044	119334	1108	7190	43150	mandarin
H1chr5	1536	22400000-22500000	197082	84824	3142	3830	79144	mandarin
H1chr5	1537	22500000-22600000	195894	87994	500	650	94166	mandarin
H1chr5	1538	22600000-22700000	174624	66856	2598	5326	72096	mandarin
H1chr5	1539	22700000-22800000	193994	103348	230	256	84286	mandarin
H1chr5	1540	22800000-22900000	195954	113482	1222	1812	63690	mandarin
H1chr5	1541	22900000-23000000	193742	94542	1652	2148	61994	mandarin
H1chr5	1542	23000000-23100000	192972	101214	14974	2904	42856	mandarin
H1chr5	1543	23100000-23200000	186972	91880	5382	6304	38810	mandarin
H1chr5	1544	23200000-23300000	196642	116806	850	1012	68930	mandarin
H1chr5	1545	23300000-23400000	187180	99452	658	316	79406	mandarin
H1chr5	1546	23400000-23500000	182562	119172	3130	2434	38290	mandarin
H1chr5	1547	23500000-23600000	190048	110768	2508	2408	52632	mandarin
H1chr5	1548	23600000-23700000	147526	47348	1442	2144	48706	mandarin
H1chr5	1549	23700000-23800000	132164	27604	2318	2728	42730	mandarin
H1chr5	1550	23800000-23900000	191044	119998	748	1260	56056	mandarin
H1chr5	1551	23900000-24000000	165048	87494	1678	2272	42166	mandarin
H1chr5	1552	24000000-24100000	189732	107750	1474	2542	54684	mandarin
H1chr5	1553	24100000-24200000	180316	96094	1028	3300	63624	mandarin
H1chr5	1554	24200000-24300000	180250	84916	1626	2408	76860	mandarin
H1chr5	1555	24300000-24400000	190626	83416	550	1148	96140	mandarin
H1chr5	1556	24400000-24500000	127278	56980	6480	2240	37272	mandarin
H1chr5	1557	24500000-24600000	199494	134246	1844	1732	43808	mandarin
H1chr5	1558	24600000-24700000	174978	76346	990	1052	65152	mandarin
H1chr5	1559	24700000-24800000	178256	98960	1266	688	67338	mandarin
H1chr5	1560	24800000-24900000	181106	98706	1800	1596	53898	mandarin
H1chr5	1561	24900000-25000000	182120	87886	5106	5218	35828	mandarin
H1chr5	1562	25000000-25100000	198538	97190	3280	3388	62420	mandarin
H1chr5	1563	25100000-25200000	196548	88058	3448	9922	51644	mandarin
H1chr5	1564	25200000-25300000	198928	116166	996	1378	68978	mandarin
H1chr5	1565	25300000-25400000	195462	82240	8494	3052	61974	mandarin
H1chr5	1566	25400000-25500000	180398	89430	2106	2290	63190	mandarin
H1chr5	1567	25500000-25600000	193010	87290	5178	4264	62402	mandarin
H1chr5	1568	25600000-25700000	180048	39046	4476	3864	32924	mandarin
H1chr5	1569	25700000-25800000	174802	5920	1784	2114	24838	mandarin
H1chr5	1570	25800000-25900000	173650	38138	2740	2518	73246	mandarin
H1chr5	1571	25900000-26000000	187900	31578	2278	3670	102324	mandarin
H1chr5	1572	26000000-26100000	197010	60116	2394	2788	91046	mandarin
H1chr5	1573	26100000-26200000	190390	83824	1290	5426	66250	mandarin
H1chr5	1574	26200000-26300000	198700	115614	1774	1642	61068	mandarin
H1chr5	1575	26300000-26400000	156354	72568	3962	1490	40774	mandarin
H1chr5	1576	26400000-26500000	197842	112560	2430	3388	53544	mandarin
H1chr5	1577	26500000-26600000	191302	115788	1100	1148	59564	mandarin
H1chr5	1578	26600000-26700000	190258	103248	1336	1538	67700	mandarin
H1chr5	1579	26700000-26800000	176816	67312	1754	1026	88574	mandarin
H1chr5	1580	26800000-26900000	110174	19110	4920	2568	21342	mandarin
H1chr5	1581	26900000-27000000	116614	8806	4176	2984	18484	mandarin
H1chr5	1582	27000000-27100000	113546	15994	4658	2762	25172	mandarin
H1chr5	1583	27100000-27200000	139590	47104	4484	2614	47902	mandarin
H1chr5	1584	27200000-27300000	157072	71510	3042	2392	50990	mandarin
H1chr5	1585	27300000-27400000	195904	101446	1478	2844	67870	mandarin
H1chr5	1586	27400000-27500000	198084	81408	3036	4952	78380	mandarin
H1chr5	1587	27500000-27600000	198170	92210	5702	5996	38630	mandarin
H1chr5	1588	27600000-27700000	191080	111342	3458	3012	46118	mandarin
H1chr5	1589	27700000-27800000	198742	116006	3738	5604	49626	mandarin
H1chr5	1590	27800000-27900000	197282	125260	996	1086	56404	mandarin
H1chr5	1591	27900000-28000000	198706	126746	1418	1288	51066	mandarin
H1chr5	1592	28000000-28100000	194688	114056	1120	1112	64992	mandarin
H1chr5	1593	28100000-28200000	194204	117750	2430	2356	53354	mandarin
H1chr5	1594	28200000-28300000	191006	109310	1794	1898	58932	mandarin
H1chr5	1595	28300000-28400000	193050	111470	2506	3402	56202	mandarin
H1chr5	1596	28400000-28500000	197246	113678	1972	2858	59056	mandarin
H1chr5	1597	28500000-28600000	186842	101746	1788	2988	61632	mandarin
H1chr5	1598	28600000-28700000	185850	107206	1484	2730	53622	mandarin
H1chr5	1599	28700000-28800000	180346	77390	2346	3212	75438	mandarin
H1chr5	1600	28800000-28900000	181388	80588	1762	2432	69736	mandarin
H1chr5	1601	28900000-29000000	193678	107744	1504	2484	64282	mandarin
H1chr5	1602	29000000-29100000	180994	92136	2418	3392	61092	mandarin
H1chr5	1603	29100000-29200000	194742	103426	1814	2126	71174	mandarin
H1chr5	1604	29200000-29300000	169852	69502	1616	2486	73682	mandarin
H1chr5	1605	29300000-29400000	185814	88620	2486	4632	59424	mandarin
H1chr5	1606	29400000-29500000	189062	84512	2162	4192	73772	mandarin
H1chr5	1607	29500000-29600000	194006	89218	2072	2144	80956	mandarin
H1chr5	1608	29600000-29700000	188406	80988	2724	1908	81480	mandarin
H1chr5	1609	29700000-29800000	195560	76724	2654	1676	83022	mandarin
H1chr5	1610	29800000-29900000	193642	88106	2876	5592	64600	mandarin
H1chr5	1611	29900000-30000000	193672	86012	1996	2244	81692	mandarin
H1chr5	1612	30000000-30100000	173228	83760	2268	1642	65796	mandarin
H1chr5	1613	30100000-30200000	189706	85672	2772	2348	57884	mandarin
H1chr5	1614	30200000-30300000	197036	102482	1256	2166	73528	mandarin
H1chr5	1615	30300000-30400000	196304	108718	1830	2628	62960	mandarin
H1chr5	1616	30400000-30500000	198226	120180	2218	1412	53538	mandarin
H1chr5	1617	30500000-30600000	196190	104288	2450	5006	54972	mandarin
H1chr5	1618	30600000-30700000	191918	89874	4280	5716	47380	mandarin
H1chr5	1619	30700000-30800000	196168	109614	1896	1664	64356	mandarin
H1chr5	1620	30800000-30900000	197738	99178	2828	2050	75198	mandarin
H1chr5	1621	30900000-31000000	198312	133288	1502	1162	48156	mandarin
H1chr5	1622	31000000-31100000	195984	119120	4352	4442	36732	mandarin
H1chr5	1623	31100000-31200000	195248	104706	3362	2690	54278	mandarin
H1chr5	1624	31200000-31300000	197788	104276	2378	3060	54314	mandarin
H1chr5	1625	31300000-31400000	168852	76478	1122	1818	70010	mandarin
H1chr5	1626	31400000-31500000	195540	114344	2882	2602	53612	mandarin
H1chr5	1627	31500000-31600000	193346	95086	3080	5100	46864	mandarin
H1chr5	1628	31600000-31700000	199046	109808	960	1752	66390	mandarin
H1chr5	1629	31700000-31800000	195768	76270	1044	882	98710	mandarin
H1chr5	1630	31800000-31900000	189192	84752	2214	3522	65826	mandarin
H1chr5	1631	31900000-32000000	195670	110864	1922	4088	48280	mandarin
H1chr5	1632	32000000-32100000	195392	110078	2400	2080	57900	mandarin
H1chr5	1633	32100000-32200000	198344	105474	2026	7772	55238	mandarin
H1chr5	1634	32200000-32300000	187840	58620	7994	29384	11582	pummelo
H1chr5	1635	32300000-32400000	189432	42804	6420	30320	23822	Undetermined
H1chr5	1636	32400000-32500000	184206	44062	2056	75974	8040	pummelo
H1chr5	1637	32500000-32600000	191510	62966	1842	5526	83654	mandarin
H1chr5	1638	32600000-32700000	189174	52378	3360	39482	39616	Undetermined
H1chr5	1639	32700000-32800000	194424	59026	3132	52182	20336	pummelo
H1chr5	1640	32800000-32900000	186612	55194	1808	12960	61992	mandarin
H1chr5	1641	32900000-33000000	195464	95878	2082	4456	46206	mandarin
H1chr5	1642	33000000-33100000	196490	94318	406	864	83338	mandarin
H1chr5	1643	33100000-33200000	198322	127256	988	1172	50228	mandarin
H1chr5	1644	33200000-33300000	193536	114156	608	864	69890	mandarin
H1chr5	1645	33300000-33400000	185846	72776	674	1004	103682	mandarin
H1chr5	1646	33400000-33500000	190254	87542	618	648	87380	mandarin
H1chr5	1647	33500000-33600000	198824	124098	826	1468	53656	mandarin
H1chr5	1648	33600000-33700000	192692	120368	1320	3230	40074	mandarin
H1chr5	1649	33700000-33800000	185294	96628	4346	5434	33318	mandarin
H1chr5	1650	33800000-33900000	177062	92946	4490	3058	37532	mandarin
H1chr5	1651	33900000-34000000	195454	71424	8414	11440	20866	Undetermined
H1chr5	1652	34000000-34100000	194628	90158	2526	2398	66654	mandarin
H1chr5	1653	34100000-34200000	197400	121382	620	626	62730	mandarin
H1chr5	1654	34200000-34300000	196856	93382	612	782	89198	mandarin
H1chr5	1655	34300000-34400000	174166	86446	568	650	75080	mandarin
H1chr5	1656	34400000-34500000	150982	39504	2324	4730	59662	mandarin
H1chr5	1657	34500000-34600000	126554	31154	1364	3110	59288	mandarin
H1chr5	1658	34600000-34700000	182466	75370	2096	1264	80884	mandarin
H1chr5	1659	34700000-34800000	189048	97252	1712	1692	65588	mandarin
H1chr5	1660	34800000-34900000	195164	92230	4100	13844	41298	mandarin
H1chr5	1661	34900000-35000000	198744	125254	1128	1660	54700	mandarin
H1chr5	1662	35000000-35100000	198260	112390	630	882	70424	mandarin
H1chr5	1663	35100000-35200000	198542	120334	4216	4364	45264	mandarin
H1chr5	1664	35200000-35300000	199174	116232	922	926	65354	mandarin
H1chr5	1665	35300000-35400000	193690	105874	1540	750	69858	mandarin
H1chr5	1666	35400000-35500000	183762	44574	2098	1554	89632	mandarin
H1chr5	1667	35500000-35600000	183432	75352	2048	1032	88354	mandarin
H1chr5	1668	35600000-35700000	172078	74144	3732	1450	61354	mandarin
H1chr5	1669	35700000-35800000	197658	106748	2400	1732	65840	mandarin
H1chr5	1670	35800000-35900000	198026	111826	1662	2210	55758	mandarin
H1chr5	1671	35900000-36000000	178230	100720	2314	2150	53906	mandarin
H1chr5	1672	36000000-36100000	186882	93700	1740	3284	64002	mandarin
H1chr5	1673	36100000-36200000	181860	88672	2098	4150	48416	mandarin
H1chr5	1674	36200000-36300000	196082	117020	2866	4650	40226	mandarin
H1chr5	1675	36300000-36400000	193862	116172	2436	2078	45706	mandarin
H1chr5	1676	36400000-36500000	173780	92672	2052	998	64368	mandarin
H1chr5	1677	36500000-36600000	198384	124008	1406	1888	52108	mandarin
H1chr5	1678	36600000-36700000	196828	115306	4502	2002	51650	mandarin
H1chr5	1679	36700000-36800000	197110	103166	4904	5818	42906	mandarin
H1chr5	1680	36800000-36900000	195308	57698	4892	9510	65032	mandarin
H1chr5	1681	36900000-37000000	191338	93056	4268	2558	57444	mandarin
H1chr5	1682	37000000-37100000	192264	97636	2878	1658	66920	mandarin
H1chr5	1683	37100000-37200000	191880	117188	1560	2702	52710	mandarin
H1chr5	1684	37200000-37300000	194706	126332	1876	2298	42030	mandarin
H1chr5	1685	37300000-37400000	194886	79324	1412	902	94884	mandarin
H1chr5	1686	37400000-37500000	186560	76556	818	1532	74422	mandarin
H1chr5	1687	37500000-37600000	158568	50260	2872	2018	73534	mandarin
H1chr5	1688	37600000-37700000	193886	99944	2224	3272	52702	mandarin
H1chr5	1689	37700000-37800000	156960	35198	1482	2270	63664	mandarin
H1chr5	1690	37800000-37900000	181076	73772	5074	6164	52090	mandarin
H1chr5	1691	37900000-38000000	196144	123960	1074	1786	49564	mandarin
H1chr5	1692	38000000-38100000	195996	113594	1252	880	64804	mandarin
H1chr5	1693	38100000-38200000	147632	57270	1584	2712	41264	mandarin
H1chr5	1694	38200000-38300000	160888	81308	1438	5258	36694	mandarin
H1chr5	1695	38300000-38400000	167318	80130	2794	3346	52766	mandarin
H1chr5	1696	38400000-38500000	186386	110404	1336	1328	59334	mandarin
H1chr5	1697	38500000-38600000	135662	63814	2408	3756	33082	mandarin
H1chr5	1698	38600000-38700000	186168	62034	10734	3842	44470	mandarin
H1chr5	1699	38700000-38800000	195154	101762	4642	3368	52620	mandarin
H1chr5	1700	38800000-38900000	197202	132580	998	716	45922	mandarin
H1chr5	1701	38900000-39000000	191944	96386	1742	1752	67640	mandarin
H1chr5	1702	39000000-39100000	187910	94480	2828	2554	62574	mandarin
H1chr5	1703	39100000-39200000	157154	57726	2678	840	62286	mandarin
H1chr5	1704	39200000-39300000	190384	97044	4932	4794	37560	mandarin
H1chr5	1705	39300000-39400000	177354	77936	5944	7820	42224	mandarin
H1chr5	1706	39400000-39500000	174234	67724	732	1156	81612	mandarin
H1chr5	1707	39500000-39600000	190464	77958	3078	3884	48514	mandarin
H1chr5	1708	39600000-39700000	198646	120398	2826	3010	36924	mandarin
H1chr5	1709	39700000-39800000	174286	58994	1888	3678	63548	mandarin
H1chr5	1710	39800000-39900000	128312	24808	1114	2822	17988	mandarin
H1chr5	1711	39900000-40000000	197492	96874	3026	3174	61390	mandarin
H1chr5	1712	40000000-40100000	188378	101830	3176	1990	57092	mandarin
H1chr5	1713	40100000-40200000	190642	78640	1080	1590	88668	mandarin
H1chr5	1714	40200000-40300000	196310	111020	576	1486	58296	mandarin
H1chr5	1715	40300000-40400000	188398	129072	918	792	45738	mandarin
H1chr5	1716	40400000-40500000	195530	85578	2434	1354	70244	mandarin
H1chr5	1717	40500000-40600000	198652	122846	3140	2352	47800	mandarin
H1chr5	1718	40600000-40700000	196350	110524	914	1838	61090	mandarin
H1chr5	1719	40700000-40800000	189566	89382	1308	1498	77862	mandarin
H1chr5	1720	40800000-40900000	194058	117072	714	1216	56296	mandarin
H1chr5	1721	40900000-41000000	195088	119664	4434	3954	35512	mandarin
H1chr5	1722	41000000-41100000	198480	128018	890	1916	51480	mandarin
H1chr5	1723	41100000-41200000	187030	113166	1672	1392	45786	mandarin
H1chr5	1724	41200000-41300000	194004	99650	1714	1940	65758	mandarin
H1chr5	1725	41300000-41400000	199066	135048	1146	1064	44544	mandarin
H1chr5	1726	41400000-41500000	192684	78520	5506	5256	60320	mandarin
H1chr5	1727	41500000-41600000	199026	113758	2304	3198	50746	mandarin
H1chr5	1728	41600000-41700000	198132	126190	778	536	55548	mandarin
H1chr5	1729	41700000-41800000	199222	123798	910	1998	52218	mandarin
H1chr5	1730	41800000-41900000	199010	119730	1480	1284	55996	mandarin
H1chr5	1731	41900000-42000000	197968	126308	1532	4698	42544	mandarin
H1chr5	1732	42000000-42100000	190718	128872	1626	1856	41240	mandarin
H1chr5	1733	42100000-42200000	196042	124460	2688	3224	41200	mandarin
H1chr5	1734	42200000-42300000	198736	141228	956	566	42646	mandarin
H1chr5	1735	42300000-42400000	198748	131712	986	1360	43810	mandarin
H1chr5	1736	42400000-42500000	195134	128272	1180	1876	46198	mandarin
H1chr5	1737	42500000-42600000	192222	105880	1834	2222	58584	mandarin
H1chr5	1738	42600000-42700000	197176	130920	1106	2158	46226	mandarin
H1chr5	1739	42700000-42800000	197506	104516	2002	2420	52022	mandarin
H1chr5	1740	42800000-42900000	198588	111502	712	836	61708	mandarin
H1chr5	1741	42900000-43000000	196558	130806	1306	2076	42628	mandarin
H1chr5	1742	43000000-43100000	193734	107688	2854	2704	42844	mandarin
H1chr5	1743	43100000-43200000	198784	132736	1950	1932	39042	mandarin
H1chr5	1744	43200000-43300000	198642	119412	1636	746	59748	mandarin
H1chr5	1745	43300000-43400000	197458	111620	2036	2764	44960	mandarin
H1chr5	1746	43400000-43500000	198172	134160	1396	1778	41876	mandarin
H1chr5	1747	43500000-43600000	186540	99790	1374	1564	70270	mandarin
H1chr5	1748	43600000-43700000	196652	128228	1270	1542	51362	mandarin
H1chr5	1749	43700000-43800000	198256	128722	1090	2154	48334	mandarin
H1chr5	1750	43800000-43900000	196018	135462	1398	2606	42238	mandarin
H1chr5	1751	43900000-44000000	196094	127358	884	1838	49376	mandarin
H1chr5	1752	44000000-44100000	199292	129818	902	1284	53356	mandarin
H1chr5	1753	44100000-44200000	199288	119058	994	2774	53034	mandarin
H1chr5	1754	44200000-44300000	198924	129092	1388	2526	53466	mandarin
H1chr5	1755	44300000-44400000	198084	129678	1144	2448	47918	mandarin
H1chr5	1756	44400000-44500000	199584	131670	1074	1440	50492	mandarin
H1chr5	1757	44500000-44600000	198214	118644	864	1476	62070	mandarin
H1chr5	1758	44600000-44700000	199230	126146	1340	2906	47990	mandarin
H1chr5	1759	44700000-44800000	199560	136372	1154	2046	44368	mandarin
H1chr5	1760	44800000-44900000	198822	123724	992	2246	51612	mandarin
H1chr5	1761	44900000-45000000	199236	130578	978	1212	52872	mandarin
H1chr5	1762	45000000-45100000	198632	120436	1610	2590	51812	mandarin
H1chr5	1763	45100000-45200000	183778	108314	2016	2620	42364	mandarin
H1chr5	1764	45200000-45300000	162814	93464	1692	2338	42966	mandarin
H1chr5	1765	45300000-45400000	198664	120540	1654	2506	52410	mandarin
H1chr5	1766	45400000-45500000	182574	121486	548	1170	47104	mandarin
H1chr5	1767	45500000-45600000	196342	115272	3242	3786	42410	mandarin
H1chr5	1768	45600000-45700000	198670	136620	1980	3114	33368	mandarin
H1chr5	1769	45700000-45800000	179284	92286	3732	2934	49444	mandarin
H1chr5	1770	45800000-45900000	194302	106456	2844	1808	50174	mandarin
H1chr5	1771	45900000-46000000	198454	135214	854	1942	45804	mandarin
H1chr5	1772	46000000-46100000	199756	140372	546	1832	41688	mandarin
H1chr5	1773	46100000-46200000	196056	114990	738	1174	60626	mandarin
H1chr5	1774	46200000-46300000	198676	124884	922	1132	56862	mandarin
H1chr5	1775	46300000-46400000	199514	147782	390	872	41216	mandarin
H1chr5	1776	46400000-46500000	195094	120394	892	1348	57598	mandarin
H1chr5	1777	46500000-46600000	198504	127842	2326	3152	40484	mandarin
H1chr5	1778	46600000-46700000	199172	129480	1264	2196	44456	mandarin
H1chr5	1779	46700000-46800000	196226	118774	2314	3398	46044	mandarin
H1chr5	1780	46800000-46900000	198036	122146	714	1324	57576	mandarin
H1chr5	1781	46900000-47000000	199682	135474	556	1618	52412	mandarin
H1chr5	1782	47000000-47100000	197296	127366	2142	1332	50726	mandarin
H1chr5	1783	47100000-47200000	199482	133518	1336	2748	41270	mandarin
H1chr5	1784	47200000-47300000	197916	133806	1186	3698	38310	mandarin
H1chr5	1785	47300000-47400000	199404	127002	754	958	56310	mandarin
H1chr5	1786	47400000-47500000	199450	140046	782	1294	42860	mandarin
H1chr5	1787	47500000-47600000	199314	131898	636	1378	52170	mandarin
H1chr5	1788	47600000-47700000	198968	125110	770	1860	46908	mandarin
H1chr5	1789	47700000-47800000	193542	132254	490	764	51924	mandarin
H1chr5	1790	47800000-47900000	167712	103224	2548	2680	38102	mandarin
H1chr5	1791	47900000-48000000	196536	127822	2376	3300	37254	mandarin
H1chr5	1792	48000000-48100000	198996	129456	898	1656	50802	mandarin
H1chr5	1793	48100000-48200000	191584	130572	984	1358	43890	mandarin
H1chr5	1794	48200000-48300000	199650	133952	542	878	51754	mandarin
H1chr5	1795	48300000-48400000	198338	133040	416	1098	52786	mandarin
H1chr5	1796	48400000-48500000	198934	135022	1388	1712	45586	mandarin
H1chr5	1797	48500000-48600000	199492	129860	1142	2142	46866	mandarin
H1chr5	1798	48600000-48700000	198574	138648	980	1692	42740	mandarin
H1chr5	1799	48700000-48800000	199066	125902	764	1646	53828	mandarin
H1chr5	1800	48800000-48900000	198028	127954	2090	2456	43038	mandarin
H1chr5	1801	48900000-49000000	199022	127828	884	2438	49688	mandarin
H1chr5	1802	49000000-49100000	199682	133054	432	948	53116	mandarin
H1chr5	1803	49100000-49200000	198664	129012	1464	1938	47862	mandarin
H1chr5	1804	49200000-49300000	195346	129348	654	1464	47628	mandarin
H1chr5	1805	49300000-49400000	199556	129584	1090	2016	51360	mandarin
H1chr5	1806	49400000-49500000	193216	123444	1120	1636	49772	mandarin
H1chr5	1807	49500000-49600000	198666	129430	2190	2534	41354	mandarin
H1chr5	1808	49600000-49700000	198670	140176	1376	2704	33176	mandarin
H1chr5	1809	49700000-49800000	199360	131920	782	848	51618	mandarin
H1chr5	1810	49800000-49900000	199234	119684	502	1746	58952	mandarin
H1chr5	1811	49900000-50000000	198766	119736	1076	1768	52264	mandarin
H1chr5	1812	50000000-50100000	197014	135632	942	1470	41564	mandarin
H1chr5	1813	50100000-50200000	198960	125952	836	1856	50954	mandarin
H1chr5	1814	50200000-50300000	197092	128542	710	1494	46160	mandarin
H1chr5	1815	50300000-50348529	73046	21566	1556	1106	14184	mandarin
H1chr6	1816	0-100000	174088	100094	460	694	66960	mandarin
H1chr6	1817	100000-200000	199408	149704	20	24	49434	mandarin
H1chr6	1818	200000-300000	199610	145438	2	30	53992	mandarin
H1chr6	1819	300000-400000	198412	142778	20	10	55228	mandarin
H1chr6	1820	400000-500000	176098	115806	216	362	55838	mandarin
H1chr6	1821	500000-600000	199202	137144	92	232	59958	mandarin
H1chr6	1822	600000-700000	199012	135676	1450	3152	35752	mandarin
H1chr6	1823	700000-800000	170976	98370	1284	1670	37670	mandarin
H1chr6	1824	800000-900000	198472	130334	612	1262	48208	mandarin
H1chr6	1825	900000-1000000	195880	130640	880	2168	43256	mandarin
H1chr6	1826	1000000-1100000	138236	83042	1424	3492	30128	mandarin
H1chr6	1827	1100000-1200000	199454	141950	726	846	42474	mandarin
H1chr6	1828	1200000-1300000	196912	139870	1112	1994	36206	mandarin
H1chr6	1829	1300000-1400000	193992	125482	714	524	40226	mandarin
H1chr6	1830	1400000-1500000	190152	109934	1852	2130	54788	mandarin
H1chr6	1831	1500000-1600000	198788	142900	1114	1812	37798	mandarin
H1chr6	1832	1600000-1700000	198176	141618	1112	2548	36702	mandarin
H1chr6	1833	1700000-1800000	199240	138040	1088	2072	43492	mandarin
H1chr6	1834	1800000-1900000	194382	133404	1342	896	35342	mandarin
H1chr6	1835	1900000-2000000	199128	123884	1530	3834	41294	mandarin
H1chr6	1836	2000000-2100000	199576	140436	1142	1224	37514	mandarin
H1chr6	1837	2100000-2200000	199468	150588	896	1194	35442	mandarin
H1chr6	1838	2200000-2300000	196902	117434	1640	2862	40590	mandarin
H1chr6	1839	2300000-2400000	198026	127504	794	1890	51370	mandarin
H1chr6	1840	2400000-2500000	199210	129962	2092	1606	47024	mandarin
H1chr6	1841	2500000-2600000	199118	132590	1260	1246	45910	mandarin
H1chr6	1842	2600000-2700000	199104	132922	992	1766	46142	mandarin
H1chr6	1843	2700000-2800000	195312	126362	1694	2890	41726	mandarin
H1chr6	1844	2800000-2900000	194088	126742	1026	992	51930	mandarin
H1chr6	1845	2900000-3000000	199584	129278	2082	1652	48380	mandarin
H1chr6	1846	3000000-3100000	196556	108476	1984	3782	51996	mandarin
H1chr6	1847	3100000-3200000	197904	132614	2016	2512	37560	mandarin
H1chr6	1848	3200000-3300000	197502	129570	1636	2518	41396	mandarin
H1chr6	1849	3300000-3400000	194700	110660	1672	2632	43122	mandarin
H1chr6	1850	3400000-3500000	198460	129868	1668	2142	44188	mandarin
H1chr6	1851	3500000-3600000	197602	131142	1632	2816	39356	mandarin
H1chr6	1852	3600000-3700000	186098	125234	1396	1584	40036	mandarin
H1chr6	1853	3700000-3800000	180194	110016	2238	3114	31612	mandarin
H1chr6	1854	3800000-3900000	166862	87750	2970	4042	39914	mandarin
H1chr6	1855	3900000-4000000	195860	121462	2284	2954	42888	mandarin
H1chr6	1856	4000000-4100000	198778	126394	1678	2806	45426	mandarin
H1chr6	1857	4100000-4200000	196910	122862	2186	4100	34830	mandarin
H1chr6	1858	4200000-4300000	197164	117124	1440	2270	48058	mandarin
H1chr6	1859	4300000-4400000	198348	133784	2024	2118	40420	mandarin
H1chr6	1860	4400000-4500000	199570	134348	828	1284	43768	mandarin
H1chr6	1861	4500000-4600000	198408	129944	1364	2040	41552	mandarin
H1chr6	1862	4600000-4700000	196662	129304	1660	3080	36784	mandarin
H1chr6	1863	4700000-4800000	197134	132728	1602	1694	42554	mandarin
H1chr6	1864	4800000-4900000	198370	112698	3060	3618	44160	mandarin
H1chr6	1865	4900000-5000000	195012	102378	3068	24148	33472	Undetermined
H1chr6	1866	5000000-5100000	189006	105554	5772	9096	31842	mandarin
H1chr6	1867	5100000-5200000	198648	116958	1896	2218	45872	mandarin
H1chr6	1868	5200000-5300000	199398	137126	1002	1328	42508	mandarin
H1chr6	1869	5300000-5400000	196180	131168	766	1298	42930	mandarin
H1chr6	1870	5400000-5500000	196172	116786	1988	2436	40112	mandarin
H1chr6	1871	5500000-5600000	197424	112150	2234	2344	38466	mandarin
H1chr6	1872	5600000-5700000	199676	129526	1140	1710	48528	mandarin
H1chr6	1873	5700000-5800000	199540	140638	750	1236	43144	mandarin
H1chr6	1874	5800000-5900000	196926	141124	586	886	41574	mandarin
H1chr6	1875	5900000-6000000	199108	122314	796	1600	56022	mandarin
H1chr6	1876	6000000-6100000	199316	126046	1652	2610	47134	mandarin
H1chr6	1877	6100000-6200000	199040	148348	990	978	35494	mandarin
H1chr6	1878	6200000-6300000	198594	120602	1338	2056	51098	mandarin
H1chr6	1879	6300000-6400000	197530	134092	1304	1388	40270	mandarin
H1chr6	1880	6400000-6500000	198172	120066	1964	2908	46958	mandarin
H1chr6	1881	6500000-6600000	199472	131818	1640	2006	38332	mandarin
H1chr6	1882	6600000-6700000	199072	125706	1414	1744	52366	mandarin
H1chr6	1883	6700000-6800000	197626	139266	454	870	47088	mandarin
H1chr6	1884	6800000-6900000	180704	100286	868	672	65452	mandarin
H1chr6	1885	6900000-7000000	199450	141518	898	1628	41138	mandarin
H1chr6	1886	7000000-7100000	198652	155350	476	516	32346	mandarin
H1chr6	1887	7100000-7200000	192710	111896	2446	3102	48030	mandarin
H1chr6	1888	7200000-7300000	198686	126788	2142	2612	41526	mandarin
H1chr6	1889	7300000-7400000	197724	135102	1558	3012	37368	mandarin
H1chr6	1890	7400000-7500000	197316	125074	1576	3022	46508	mandarin
H1chr6	1891	7500000-7600000	162094	75572	280	17012	46052	mandarin
H1chr6	1892	7600000-7700000	199614	131862	248	2018	45556	mandarin
H1chr6	1893	7700000-7800000	192698	117754	1502	1432	42206	mandarin
H1chr6	1894	7800000-7900000	192418	114592	1290	1718	40612	mandarin
H1chr6	1895	7900000-8000000	198988	130486	1634	1106	46518	mandarin
H1chr6	1896	8000000-8100000	199132	130048	1088	1154	51154	mandarin
H1chr6	1897	8100000-8200000	198202	117286	2240	4460	47820	mandarin
H1chr6	1898	8200000-8300000	199482	128394	1340	1270	53014	mandarin
H1chr6	1899	8300000-8400000	198916	121188	1588	2680	48078	mandarin
H1chr6	1900	8400000-8500000	192622	113984	1082	1762	53090	mandarin
H1chr6	1901	8500000-8600000	198112	133138	1258	1980	42418	mandarin
H1chr6	1902	8600000-8700000	197270	126514	1648	992	48270	mandarin
H1chr6	1903	8700000-8800000	198324	129560	1996	1554	44984	mandarin
H1chr6	1904	8800000-8900000	199482	128912	1984	2052	39154	mandarin
H1chr6	1905	8900000-9000000	191332	92342	1946	1824	57598	mandarin
H1chr6	1906	9000000-9100000	197160	106522	1346	1254	68142	mandarin
H1chr6	1907	9100000-9200000	196010	118742	1364	1192	59202	mandarin
H1chr6	1908	9200000-9300000	195054	111844	1790	1504	55670	mandarin
H1chr6	1909	9300000-9400000	199510	131020	1056	908	49826	mandarin
H1chr6	1910	9400000-9500000	188424	94892	1728	782	72208	mandarin
H1chr6	1911	9500000-9600000	198852	122660	1360	1770	53712	mandarin
H1chr6	1912	9600000-9700000	183202	81934	1536	1290	80396	mandarin
H1chr6	1913	9700000-9800000	191458	82340	2622	5126	60300	mandarin
H1chr6	1914	9800000-9900000	192294	113834	2644	2904	39008	mandarin
H1chr6	1915	9900000-10000000	199130	118376	1984	1760	51388	mandarin
H1chr6	1916	10000000-10100000	196278	121242	1958	2006	52940	mandarin
H1chr6	1917	10100000-10200000	182120	99438	1944	1264	58136	mandarin
H1chr6	1918	10200000-10300000	194218	114278	730	998	52092	mandarin
H1chr6	1919	10300000-10400000	199392	125184	1278	1730	52852	mandarin
H1chr6	1920	10400000-10500000	197024	117288	1600	1576	59704	mandarin
H1chr6	1921	10500000-10600000	198456	115956	926	1764	60226	mandarin
H1chr6	1922	10600000-10700000	199630	120808	1982	3302	46878	mandarin
H1chr6	1923	10700000-10800000	187030	64922	9034	9588	23036	mandarin
H1chr6	1924	10800000-10900000	198660	120250	1834	934	56824	mandarin
H1chr6	1925	10900000-11000000	198410	121096	742	1398	60788	mandarin
H1chr6	1926	11000000-11100000	194834	109376	2750	4910	48730	mandarin
H1chr6	1927	11100000-11200000	191902	108202	1222	2068	55196	mandarin
H1chr6	1928	11200000-11300000	198854	117154	334	688	67630	mandarin
H1chr6	1929	11300000-11400000	182806	91818	1406	2698	55668	mandarin
H1chr6	1930	11400000-11500000	187932	107958	3620	2150	42830	mandarin
H1chr6	1931	11500000-11600000	174648	87658	2652	2890	51466	mandarin
H1chr6	1932	11600000-11700000	186476	86468	1364	884	63352	mandarin
H1chr6	1933	11700000-11800000	186866	56974	2556	2206	88822	mandarin
H1chr6	1934	11800000-11900000	185444	92718	2816	1542	58716	mandarin
H1chr6	1935	11900000-12000000	197082	119806	1272	1486	53190	mandarin
H1chr6	1936	12000000-12100000	192394	99208	1818	2402	59290	mandarin
H1chr6	1937	12100000-12200000	198952	112312	1444	1840	66606	mandarin
H1chr6	1938	12200000-12300000	196678	110972	2196	2112	59370	mandarin
H1chr6	1939	12300000-12400000	196676	122808	2202	1812	44706	mandarin
H1chr6	1940	12400000-12500000	191912	101870	1832	2232	62630	mandarin
H1chr6	1941	12500000-12600000	195532	107920	1896	1896	61952	mandarin
H1chr6	1942	12600000-12700000	196446	104110	1742	2056	67128	mandarin
H1chr6	1943	12700000-12800000	198366	108930	3274	1734	57804	mandarin
H1chr6	1944	12800000-12900000	198702	119658	2504	2180	50482	mandarin
H1chr6	1945	12900000-13000000	198466	126520	1952	1716	44876	mandarin
H1chr6	1946	13000000-13100000	198146	93166	1818	2362	73544	mandarin
H1chr6	1947	13100000-13200000	195072	110862	3440	1874	57204	mandarin
H1chr6	1948	13200000-13300000	196608	97442	2114	1794	70614	mandarin
H1chr6	1949	13300000-13400000	195708	100692	1702	1708	69086	mandarin
H1chr6	1950	13400000-13500000	198408	122842	2170	9540	39000	mandarin
H1chr6	1951	13500000-13600000	198220	106794	2570	1452	58096	mandarin
H1chr6	1952	13600000-13700000	198868	92154	6088	5658	48368	mandarin
H1chr6	1953	13700000-13800000	198686	116904	1048	1350	61766	mandarin
H1chr6	1954	13800000-13900000	196614	106922	2786	2482	52372	mandarin
H1chr6	1955	13900000-14000000	198156	112054	1768	1886	57546	mandarin
H1chr6	1956	14000000-14100000	196770	92632	1670	2178	72262	mandarin
H1chr6	1957	14100000-14200000	197614	99810	3140	4310	54508	mandarin
H1chr6	1958	14200000-14300000	193272	95948	5668	7822	46054	mandarin
H1chr6	1959	14300000-14400000	190610	101476	6094	2158	49920	mandarin
H1chr6	1960	14400000-14500000	172624	79030	13230	9430	18296	Undetermined
H1chr6	1961	14500000-14600000	198194	93034	12250	3942	49994	mandarin
H1chr6	1962	14600000-14700000	192552	103190	1764	2854	58476	mandarin
H1chr6	1963	14700000-14800000	195732	68252	3558	11350	71246	mandarin
H1chr6	1964	14800000-14900000	180702	87818	1614	3058	57928	mandarin
H1chr6	1965	14900000-15000000	190406	76856	4146	5228	51876	mandarin
H1chr6	1966	15000000-15100000	197106	96656	5382	2284	62196	mandarin
H1chr6	1967	15100000-15200000	195854	106278	1990	1054	68124	mandarin
H1chr6	1968	15200000-15300000	192846	96944	2900	4690	51314	mandarin
H1chr6	1969	15300000-15400000	196746	105668	2990	3610	53604	mandarin
H1chr6	1970	15400000-15500000	191032	115908	2814	2062	51864	mandarin
H1chr6	1971	15500000-15600000	198982	118010	2092	2312	52834	mandarin
H1chr6	1972	15600000-15700000	195612	114544	3154	6106	40438	mandarin
H1chr6	1973	15700000-15800000	183484	94020	6318	3182	40090	mandarin
H1chr6	1974	15800000-15900000	194642	119748	2928	3582	43052	mandarin
H1chr6	1975	15900000-16000000	195200	103240	2928	4018	54330	mandarin
H1chr6	1976	16000000-16100000	197924	79580	11402	11782	33454	mandarin
H1chr6	1977	16100000-16200000	198610	114148	5064	6622	43790	mandarin
H1chr6	1978	16200000-16300000	193618	123594	2492	5152	37816	mandarin
H1chr6	1979	16300000-16400000	190482	102816	3592	4188	47326	mandarin
H1chr6	1980	16400000-16500000	190018	111568	4712	4922	42172	mandarin
H1chr6	1981	16500000-16600000	190338	108734	3514	2324	46108	mandarin
H1chr6	1982	16600000-16700000	193658	102160	3824	1444	65932	mandarin
H1chr6	1983	16700000-16800000	195756	103780	1894	2824	66812	mandarin
H1chr6	1984	16800000-16900000	197376	112786	2462	1730	62306	mandarin
H1chr6	1985	16900000-17000000	194530	122274	594	384	60642	mandarin
H1chr6	1986	17000000-17100000	197042	118960	824	662	62132	mandarin
H1chr6	1987	17100000-17200000	196322	100840	2132	3138	60308	mandarin
H1chr6	1988	17200000-17300000	192498	80914	1434	3412	74064	mandarin
H1chr6	1989	17300000-17400000	186076	96704	2094	2942	57364	mandarin
H1chr6	1990	17400000-17500000	193764	80472	1624	3242	79086	mandarin
H1chr6	1991	17500000-17600000	171606	59916	2850	1562	71106	mandarin
H1chr6	1992	17600000-17700000	189530	102480	1826	2536	60924	mandarin
H1chr6	1993	17700000-17800000	169048	81340	3532	4134	46568	mandarin
H1chr6	1994	17800000-17900000	196252	109568	1906	2578	56954	mandarin
H1chr6	1995	17900000-18000000	176424	61288	3542	10566	55166	mandarin
H1chr6	1996	18000000-18100000	193506	87350	2556	2894	74008	mandarin
H1chr6	1997	18100000-18200000	175648	70952	4666	6002	47450	mandarin
H1chr6	1998	18200000-18300000	187942	91582	2938	2612	63404	mandarin
[truncated: 4,056 more rows]

## Sheet: S2
Supplementary file S2. Orthofinder gene matrix for target species in this study. Genomic data was downloaded from Citrus Genome Database at Huazhong Agricultural University. Only the primary protein sequences were used.
Species ID	Name
CMJ	Citrus_grandis_majiayou
GJ	Fortunella_hindsii
HWB	Citrus_grandis_wanbaiyou
HZYT	Citrus_maxima_huazhouyou
SWO	Citrus_sinensis
ZK	Poncirus_trifoliata
GCF	Citrus_clementina
AEG	Aegle_marmelos
MSYG	Citrus_mangshanensis
CGI	Citropsis_gilletiana
ZGYCC	Citrus_ichangensis
HKC	Atalantia_buxfoliata
JLX	Murraya_paniculata
LW	Citrus_linwuensis
AZM	Citrus_australasica
HP	Clausena_lansium
XGF	Citrus_maxima_majia
HH	Citrus_hongheensis
SYT	Luvunga_scandens
JZ	Citrus_reticulata
RL	Citrus_medica
hap1	Citrus changshan-huyou HY1
hap2	Citrus changshan-huyou HY2
Orthofinder outputs:
Single copy Orthogroup		Orthogroup	primary_AEG	primary_AZM	primary_CGI	primary_Creticulata	primary_GCF	primary_GJ	primary_HH	primary_HKC	primary_HP	primary_HWB	primary_HZYT	primary_JLX	primary_LW	primary_MSYG	primary_RL	primary_SWO	primary_SYT	primary_ZGYCC	primary_ZK	primary_hap1	primary_hap2
OG0012599		OG0000000	Aeg249300.1			CP8g000663.t1		Fh1g15230.1, Fh1g16970.1, Fh1g16980.1, Fh1g16990.1, Fh1g17150.1, Fh1g17380.1, Fh1g17980.1, Fh1g19210.1, Fh1g19500.1, Fh1g20010.1, Fh1g20220.1, Fh1g20360.1, Fh1g20460.1, Fh1g20480.1, Fh1g20720.1, Fh1g20960.1, Fh1g21010.1, Fh1g21190.1, Fh1g21200.1, Fh1g21230.1, Fh1g21280.1, Fh1g21340.1, Fh1g21860.1, Fh1g21890.1, Fh1g21970.1, Fh1g22140.1, Fh1g22460.1, Fh1g22480.1, Fh1g22500.1, Fh1g22730.1, Fh1g22810…				Cg1g021220.1
OG0012603		OG0000001	Aeg200360.1	Egl006180.1, Egl018670.1, Egl020020.1, Egl020830.1, Egl034290.1, Egl034300.1, Egl034390.1, Egl035500.1, Egl038520.1, Egl038530.1, Egl045010.1, Egl047200.1, Egl069220.1, Egl071850.1, Egl079030.1, Egl108680.1, Egl116950.1, Egl119930.1, Egl147340.1, Egl160740.1, Egl161440.1, Egl161450.1, Egl183340.1, Egl183550.1, Egl203800.1, Egl204450.1, Egl207600.1, Egl208610.1, Egl208620.1, Egl218900.1, Egl223010…	Citropsis010620.1, Citropsis015990.1, Citropsis080500.1, Citropsis080730.1, Citropsis080890.1, Citropsis089280.1, Citropsis089530.1, Citropsis090220.1, Citropsis095490.1, Citropsis101700.1, Citropsis147300.1, Citropsis165460.1, Citropsis165710.1, Citropsis165720.1, Citropsis168890.1, Citropsis168900.1, Citropsis193670.1, Citropsis211360.1, Citropsis216880.1, Citropsis239280.1, Citropsis239290.1	CP1g000009.t1, CP1g000727.t1, CP1g000795.t1, CP1g000820.t1, CP1g000841.t1, CP1g001041.t1, CP1g001085.t1, CP1g001094.t1, CP1g001300.t1, CP1g001326.t1, CP1g001327.t1, CP1g001369.t1, CP1g001520.t1, CP1g001521.t1, CP1g001639.t1, CP1g002812.t1, CP1g002822.t1, CP1g003370.t1, CP2g001735.t1, CP2g002043.t1, CP2g002079.t1, CP2g002449.t1, CP2g002655.t1, CP2g002972.t1, CP2g003067.t1, CP2g003085.t1, CP2g00315…		Fh1g04190.1, Fh1g04600.1, Fh1g07110.1, Fh1g13170.1, Fh1g17490.1, Fh1g22850.1, Fh1g25000.1, Fh1g25180.1, Fh1g26920.1, Fh1g31020.1, Fh2g01550.1, Fh2g08930.1, Fh2g10040.1, Fh2g16640.1, Fh2g26220.1, Fh3g04950.1, Fh3g05240.1, Fh3g09180.1, Fh3g10770.1, Fh3g11300.1, Fh3g13360.1, Fh3g14940.1, Fh3g15480.1, Fh3g15680.1, Fh3g19210.1, Fh3g22790.1, Fh4g02480.1, Fh4g10930.1, Fh4g10940.1, Fh4g19880.1, Fh4g23990…	Chh000390.1, Chh029550.1, Chh037530.1, Chh040020.1, Chh040690.1, Chh054940.1, Chh071840.1, Chh091830.1, Chh099970.1, Chh104000.1, Chh109630.1, Chh110000.1, Chh128460.1, Chh145250.1, Chh147150.1, Chh147580.1, Chh172730.1, Chh184970.1, Chh208510.1, Chh232680.1, Chh255480.1, Chh262350.1, Chh273750.1, Chh288580.1, Chh305610.1	Abu4g_004570.1, Abu5g_017990.1, Abu6g_018670.1, Abu7g_013690.1, Abu8g_023030.1	HP003130.1, HP007540.1, HP122890.1, HP135200.1, HP153030.1, HP191840.1, HP199460.1, HP267890.1, HP270450.1, HP284710.1, HP290570.1		Cmt144150.1	JLX210360.1	LW220930.1, LW268300.1, LW279240.1, LW311080.1	Cms274660.1	Cm156100.1	Cs_ont_1g005850.1, Cs_ont_3g029090.1, Cs_ont_5g035550.1, Cs_ont_6g016330.1, Cs_ont_7g009130.1, Cs_ont_7g010550.1, Cs_ont_8g011910.1, Cs_ont_8g015640.1, Cs_ont_9g011100.1	SYT000130.1	Cic048640.1, Cic051500.1, Cic170130.1	Pt9g010410.1, Pt9g016750.1	H1Y02114.1, H1Y02356.1, H1Y02793.1, H1Y02861.1, H1Y02968.1, H1Y03004.1, H1Y03255.1, H1Y03809.1, H1Y04037.1, H1Y04312.1, H1Y09286.1, H1Y09621.1, H1Y09635.1, H1Y09967.1, H1Y10021.1, H1Y13465.1, H1Y13939.1, H1Y14158.1, H1Y14753.1, H1Y16154.1, H1Y17058.1, H1Y20957.1, H1Y21588.1, H1Y21888.1, H1Y22753.1, H1Y23240.1, H1Y23243.1, H1Y23743.1, H1Y23760.1, H1Y24216.1, H1Y24645.1, H1Y26444.1, H1Y28339.1, H1Y…	H2Y02367.1, H2Y02617.1, H2Y04939.1, H2Y07658.1, H2Y08054.1, H2Y08448.1, H2Y09172.1, H2Y10030.1, H2Y12173.1, H2Y12611.1, H2Y12624.1, H2Y13106.1, H2Y13435.1, H2Y13545.1, H2Y13721.1, H2Y13730.1, H2Y13739.1, H2Y13789.1, H2Y13930.1, H2Y14050.1, H2Y14098.1, H2Y14388.1, H2Y16472.1, H2Y16737.1, H2Y17073.1, H2Y17524.1, H2Y17738.1, H2Y21223.1, H2Y22598.1, H2Y23016.1, H2Y23019.1, H2Y23910.1, H2Y24196.1, H2Y…
OG0012604		OG0000002	Aeg006280.1, Aeg006290.1, Aeg006310.1, Aeg006400.1, Aeg054410.1, Aeg073040.1, Aeg087060.1, Aeg087070.1, Aeg087080.1, Aeg087090.1, Aeg087100.1, Aeg087120.1, Aeg087130.1, Aeg213240.1, Aeg247320.1, Aeg247330.1, Aeg271800.1, Aeg272960.1, Aeg273000.1	Egl024000.1, Egl024010.1, Egl024040.1, Egl029440.1, Egl029480.1, Egl185210.1, Egl206270.1, Egl206530.1, Egl206730.1, Egl231330.1, Egl231340.1, Egl231350.1, Egl231360.1, Egl231370.1, Egl231390.1, Egl231400.1, Egl231410.1, Egl231440.1, Egl252920.1, Egl263540.1, Egl263550.1, Egl263560.1, Egl263600.1, Egl263610.1, Egl263620.1, Egl263640.1, Egl276200.1, Egl276220.1, Egl276240.1, Egl276270.1, Egl292390…	Citropsis034370.1, Citropsis081230.1, Citropsis084780.1, Citropsis137170.1, Citropsis156560.1, Citropsis156740.1, Citropsis156780.1, Citropsis156800.1, Citropsis156840.1, Citropsis156850.1, Citropsis184580.1, Citropsis184600.1, Citropsis184610.1, Citropsis184620.1, Citropsis184630.1, Citropsis214880.1, Citropsis216140.1	CP1g001176.t1, CP1g001196.t1, CP1g001380.t1, CP2g002809.t1, CP2g002811.t1, CP2g002813.t1, CP2g002815.t1, CP3g003447.t1, CP3g003455.t1, CP3g003471.t1, CP3g003475.t1, CP3g003476.t1, CP3g003482.t1, CP3g003485.t1, CP3g003486.t1, CP4g001037.t1, CP4g003072.t1, CP4g003073.t1, CP4g003075.t1, CP4g003077.t1, CP4g003078.t1, CP7g000214.t1, CP7g000215.t1, CP7g001606.t1, CP7g001607.t1, CP7g001610.t1, CP7g00161…	Ciclev10001398m.1, Ciclev10001839m.1, Ciclev10003300m.1, Ciclev10004028m.1, Ciclev10005871m.1, Ciclev10006111m.1, Ciclev10008336m.1, Ciclev10008483m.1, Ciclev10008503m.1, Ciclev10008872m.1, Ciclev10008933m.1, Ciclev10009274m.1, Ciclev10009321m.1, Ciclev10010224m.1, Ciclev10010546m.1, Ciclev10010789m.1, Ciclev10017775m.1, Ciclev10018121m.1, Ciclev10027291m.1, Ciclev10027365m.1, Ciclev10027371m.1, …	Fh1g18130.1, Fh1g19830.1, Fh2g11310.1, Fh2g11340.1, Fh2g11350.1, Fh2g11370.1, Fh3g08040.1, Fh3g08080.1, Fh3g08100.1, Fh3g08210.1, Fh3g08230.1, Fh3g08370.1, Fh3g08400.1, Fh4g01800.1, Fh4g01810.1, Fh4g01830.1, Fh4g01860.1, Fh4g01870.1, Fh4g01880.1, Fh4g01910.1, Fh7g16840.1, Fh7g16850.1, Fh7g16930.1, Fh7g17040.1, Fh7g17070.1, Fh7g17100.1, Fh7g17250.1, Fh7g17280.1, Fh9g26200.1, FhUn03900.1, FhUn03930…	Chh035480.1, Chh105110.1, Chh105140.1, Chh105150.1, Chh105280.1, Chh105310.1, Chh126790.1, Chh211470.1, Chh212640.1, Chh213020.1, Chh232520.1, Chh232540.1, Chh280030.1	Abu1g_017970.1, Abu3g_004820.1, Abu3g_004880.1, Abu3g_004890.1, Abu3g_005080.1, Abu4g_011700.1, Abu4g_011720.1, Abu7g_013210.1, Abu7g_013220.1, Abu7g_013230.1, Abuscaffold_14_000170.1, Abuscaffold_14_000180.1, Abuscaffold_14_000190.1	HP047670.1, HP047720.1, HP047730.1, HP067410.1, HP067420.1, HP095310.1, HP134400.1, HP149090.1, HP152720.1, HP152740.1, HP152930.1, HP153000.1, HP153010.1, HP166590.1, HP196240.1, HP196250.1, HP196260.1, HP222760.1, HP222770.1, HP263190.1, HP284390.1, HP284840.1	Cg3g002780.1, Cg3g004390.1, Cg5g012760.1		JLX008460.1, JLX023160.1, JLX029790.1, JLX030020.1, JLX043000.1, JLX046370.1, JLX080930.1, JLX142890.1, JLX144940.1, JLX150170.1, JLX150290.1, JLX150340.1, JLX150500.1, JLX190160.1, JLX191650.1, JLX219840.1, JLX219900.1, JLX220640.1, JLX221010.1, JLX221060.1, JLX221220.1	LW074060.1, LW074090.1, LW074130.1, LW074150.1, LW074220.1, LW074260.1, LW074480.1, LW074530.1, LW160110.1, LW189260.1, LW189270.1, LW189280.1, LW189330.1, LW245960.1, LW245990.1, LW246010.1, LW308320.1, LW308440.1	Cms028120.1, Cms028130.1, Cms071880.1, Cms072180.1, Cms072200.1, Cms096070.1, Cms123080.1, Cms123090.1, Cms123110.1, Cms282790.1, Cms282820.1	Cm010010.1, Cm027930.1, Cm043040.1, Cm043070.1, Cm071760.1, Cm082870.1, Cm121030.1, Cm121060.1, Cm121080.1, Cm127620.1, Cm137650.1, Cm137660.1, Cm137680.1, Cm137720.1, Cm137730.1, Cm137740.1, Cm138190.1, Cm172100.1, Cm172110.1, Cm172130.1, Cm172140.1, Cm172160.1, Cm229250.1, Cm272940.1, Cm303020.1, Cm312660.1, Cm317460.1	Cs_ont_1g011790.1, Cs_ont_1g011820.1, Cs_ont_1g011840.1, Cs_ont_2g024900.1, Cs_ont_2g024930.1, Cs_ont_2g024940.1, Cs_ont_4g001800.1, Cs_ont_4g019120.1, Cs_ont_7g015010.1, Cs_ont_7g015020.1	SYT004270.1, SYT007090.1, SYT026860.1, SYT041790.1, SYT041840.1, SYT041850.1, SYT071310.1, SYT071320.1, SYT071330.1, SYT071450.1, SYT071460.1, SYT071470.1, SYT086900.1, SYT125000.1, SYT125010.1, SYT131140.1, SYT131180.1, SYT131190.1, SYT137170.1, SYT141890.1, SYT179910.1, SYT204930.1, SYT216500.1, SYT216510.1, SYT217840.1, SYT217850.1, SYT217860.1, SYT217870.1, SYT217880.1, SYT217890.1, SYT229240…	Cic058940.1, Cic058950.1, Cic059000.1, Cic059020.1, Cic059040.1, Cic067110.1, Cic067180.1, Cic067360.1, Cic067400.1, Cic075690.1, Cic120630.1, Cic120680.1, Cic120690.1, Cic162560.1, Cic175650.1, Cic175670.1, Cic175690.1, Cic175990.1, Cic177480.1, Cic187070.1, Cic187080.1, Cic247620.1, Cic247630.1, Cic247650.1, Cic247660.1, Cic258450.1	Pt1g000470.1, Pt1g000480.1, Pt1g000500.1, Pt1g000520.1, Pt1g000550.1, Pt1g000560.1, Pt1g000570.1, Pt1g009910.1, Pt2g008600.1, Pt2g009480.1, Pt2g009490.1, Pt2g009500.1, Pt2g009520.1, Pt4g000830.1, Pt4g012720.1, Pt4g012730.1, Pt4g012780.1, Pt4g012790.1, Pt4g012800.1, Pt4g012830.1, Pt5g021130.1, Pt5g021150.1, Pt5g021160.1, Pt7g004090.1, Pt7g004120.1, Pt7g004210.1, Pt7g005010.1, Pt7g006230.1, Pt9g019…	H1Y03478.1, H1Y03499.1, H1Y03668.1, H1Y09239.1, H1Y09243.1, H1Y09248.1, H1Y09250.1, H1Y14551.1, H1Y14557.1, H1Y14588.1, H1Y14603.1, H1Y14607.1, H1Y14611.1, H1Y14614.1, H1Y15994.1, H1Y15995.1, H1Y15996.1, H1Y16000.1, H1Y16002.1, H1Y16005.1, H1Y16006.1, H1Y18526.1, H1Y32192.1, H1Y32194.1, H1Y32200.1, H1Y32206.1, H1Y32207.1, H1Y33687.1, H1Y41783.1, H1Y41794.1	H2Y02948.1, H2Y02980.1, H2Y03243.1, H2Y08766.1, H2Y08771.1, H2Y08773.1, H2Y08775.1, H2Y08777.1, H2Y08779.1, H2Y08780.1, H2Y14066.1, H2Y14074.1, H2Y14116.1, H2Y14120.1, H2Y14124.1, H2Y14131.1, H2Y15423.1, H2Y15424.1, H2Y15425.1, H2Y15431.1, H2Y15433.1, H2Y15434.1, H2Y15435.1, H2Y31835.1, H2Y31837.1, H2Y31841.1, H2Y31845.1, H2Y31849.1, H2Y31850.1, H2Y31856.1, H2Y31980.1, H2Y31983.1, H2Y41747.1, H2Y…
OG0012608		OG0000003	Aeg095350.1, Aeg142160.1, Aeg193720.1	Egl013020.1, Egl020370.1, Egl023460.1, Egl024900.1, Egl025600.1, Egl037530.1, Egl061520.1, Egl111250.1, Egl124110.1, Egl147400.1, Egl161500.1, Egl163390.1, Egl163400.1, Egl176650.1, Egl177510.1, Egl195810.1, Egl197790.1, Egl220680.1, Egl223470.1, Egl232770.1, Egl286030.1, Egl289790.1, Egl291610.1, Egl291900.1, Egl302360.1	Citropsis003180.1, Citropsis025460.1, Citropsis066220.1, Citropsis161860.1, Citropsis239890.1, Citropsis264910.1	CP1g000740.t1, CP1g001664.t1, CP2g001429.t1, CP2g001625.t1, CP2g001925.t1, CP2g001952.t1, CP2g002097.t1, CP2g002160.t1, CP2g002180.t1, CP2g002200.t1, CP2g002201.t1, CP2g003139.t1, CP3g001883.t1, CP3g002496.t1, CP3g002815.t1, CP3g003008.t1, CP3g003460.t1, CP3g003785.t1, CP3g003837.t1, CP4g001452.t1, CP5g000112.t1, CP5g001476.t1, CP5g001698.t1, CP5g001699.t1, CP5g002140.t1, CP5g002416.t1, CP5g00259…	Ciclev10013460m.1	Fh1g15480.1, Fh1g17320.1, Fh1g25810.1, Fh1g26010.1, Fh1g30560.1, Fh2g01680.1, Fh2g08270.1, Fh2g09280.1, Fh3g07380.1, Fh3g09920.1, Fh3g15710.1, Fh3g16740.1, Fh3g17360.1, Fh3g24850.1, Fh3g34040.1, Fh4g06160.1, Fh4g08770.1, Fh4g13030.1, Fh4g14580.1, Fh4g17990.1, Fh4g23260.1, Fh4g24430.1, Fh5g21340.1, Fh5g22540.1, Fh5g24070.1, Fh5g43900.1, Fh6g12000.1, Fh6g14240.1, Fh7g05760.1, Fh7g08240.1, Fh7g10640…	Chh040000.1, Chh051390.1, Chh052360.1, Chh083000.1, Chh098290.1, Chh106970.1, Chh125900.1, Chh165810.1, Chh174060.1, Chh186790.1, Chh190450.1, Chh233810.1, Chh235020.1, Chh235050.1, Chh255430.1	Abu1g_017200.1, Abu3g_006880.1	HP009680.1, HP011630.1, HP013690.1, HP016640.1, HP033300.1, HP035500.1, HP040960.1, HP052230.1, HP052400.1, HP052500.1, HP069220.1, HP070970.1, HP073410.1, HP073420.1, HP074220.1, HP092170.1, HP093690.1, HP095260.1, HP111590.1, HP112970.1, HP120270.1, HP120780.1, HP124490.1, HP131100.1, HP131530.1, HP148900.1, HP150510.1, HP150650.1, HP152270.1, HP152970.1, HP158710.1, HP177350.1, HP190290.1, HP1…	Cg2g021630.1	Cmt043180.1, Cmt113320.1, Cmt145090.1, Cmt243960.1	JLX001990.1, JLX020870.1, JLX029520.1, JLX054140.1, JLX066680.1, JLX084010.1, JLX095080.1, JLX147710.1, JLX159760.1, JLX166930.1, JLX176210.1, JLX186890.1, JLX191260.1, JLX205850.1	LW039390.1, LW040940.1, LW075550.1, LW099020.1, LW106670.1, LW112640.1, LW117340.1, LW117350.1, LW120080.1, LW163230.1, LW165060.1, LW309760.1, LW314920.1	Cms013290.1, Cms019750.1, Cms046540.1, Cms047420.1, Cms071960.1, Cms097290.1, Cms097340.1, Cms097520.1, Cms115990.1, Cms128060.1, Cms130050.1, Cms131280.1, Cms133580.1, Cms147150.1, Cms149020.1, Cms149210.1, Cms149320.1, Cms151210.1, Cms157380.1, Cms158240.1, Cms164550.1, Cms183950.1, Cms184360.1, Cms203120.1, Cms216910.1, Cms220220.1, Cms221700.1, Cms223820.1, Cms249020.1, Cms266880.1, Cms268300…	Cm161480.1, Cm237870.1, Cm258290.1, Cm264630.1	Cs_ont_2g019560.1, Cs_ont_3g026920.1, Cs_ont_4g016100.1, Cs_ont_5g023070.1, Cs_ont_6g014710.1, Cs_ont_6g015070.1, Cs_ont_7g010300.1, Cs_ont_8g014250.1, Cs_ont_8g018270.1, Cs_ont_9g019750.1, Cs_ont_9g019840.1	SYT117550.1	Cic016310.1, Cic038640.1, Cic070770.1, Cic114230.1, Cic116280.1, Cic137310.1, Cic181690.1, Cic184570.1, Cic184680.1, Cic271150.1, Cic271190.1, Cic271230.1, Cic286290.1, Cic286350.1, Cic286390.1, Cic286490.1, Cic286550.1, Cic286590.1, Cic286650.1	Pt2g004340.1, Pt3g017180.1, Pt3g018890.1	H1Y02897.1, H1Y03269.1, H1Y04401.1, H1Y07636.1, H1Y08391.1, H1Y09830.1, H1Y12552.1, H1Y12635.1, H1Y14330.1, H1Y14488.1, H1Y15064.1, H1Y15071.1, H1Y15090.1, H1Y16933.1, H1Y17913.1, H1Y18098.1, H1Y20468.1, H1Y21308.1, H1Y21567.1, H1Y22549.1, H1Y23142.1, H1Y23277.1, H1Y23377.1, H1Y24080.1, H1Y24593.1, H1Y25701.1, H1Y28142.1, H1Y28321.1, H1Y28369.1, H1Y28800.1, H1Y28865.1, H1Y29135.1, H1Y29310.1, H1Y…	H2Y02221.1, H2Y03478.1, H2Y07120.1, H2Y07785.1, H2Y10202.1, H2Y12409.1, H2Y13339.1, H2Y13871.1, H2Y13892.1, H2Y13961.1, H2Y14568.1, H2Y14569.1, H2Y15646.1, H2Y16359.1, H2Y16873.1, H2Y17343.1, H2Y17436.1, H2Y17533.1, H2Y18437.1, H2Y19431.1, H2Y20589.1, H2Y22220.1, H2Y22320.1, H2Y22427.1, H2Y22635.1, H2Y22926.1, H2Y23267.1, H2Y23476.1, H2Y23833.1, H2Y23883.1, H2Y24376.1, H2Y27940.1, H2Y27981.1, H2Y…
OG0012609		OG0000004		Egl048860.1, Egl141030.1, Egl158960.1, Egl158980.1, Egl158990.1, Egl159000.1, Egl159040.1, Egl159080.1, Egl307520.1				Fh5g50170.1				Cg1g000040.1, Cg1g000080.1, Cg1g000110.1, Cg1g000140.1, Cg1g000170.1, Cg1g000180.1, Cg1g000220.1, Cg1g000260.1, Cg1g000280.1, Cg1g002460.1, Cg2g043170.1, Cg3g016230.1, Cg3g016250.1, Cg3g019940.1, Cg3g020110.1, Cg3g020160.1, Cg3g020190.1, Cg3g026190.1, Cg3g026290.1, Cg3g026300.1, Cg3g026330.1, Cg3g026350.1, Cg3g026390.1, Cg3g026410.1, Cg3g026450.1, Cg3g026490.1, Cg3g026500.1, Cg3g026510.1, Cg3g026…			LW013590.1, LW034350.1, LW067010.1, LW067050.1, LW067070.1, LW067100.1, LW067110.1, LW067140.1, LW067150.1, LW131410.1, LW131420.1, LW252590.1, LW262950.1, LW262970.1, LW308620.1, LW308660.1, LW308680.1, LW308700.1	Cms112720.1, Cms112760.1, Cms112780.1, Cms112840.1, Cms113520.1, Cms177640.1, Cms177690.1, Cms177750.1, Cms177760.1, Cms208730.1, Cms271990.1, Cms272020.1	Cm033610.1, Cm066080.1, Cm066100.1, Cm174860.1, Cm174880.1, Cm174910.1, Cm227110.1, Cm263560.1, Cm279070.1, Cm279080.1, Cm301730.1, Cm304340.1, Cm314290.1			Cic191760.1, Cic233200.1, Cic233230.1, Cic233240.1, Cic233260.1, Cic270880.1, Cic270900.1, Cic287080.1		H1Y01013.1, H1Y01018.1, H1Y01026.1, H1Y01034.1, H1Y01049.1, H1Y01054.1, H1Y01294.1, H1Y01295.1, H1Y01296.1, H1Y01298.1, H1Y01300.1, H1Y01303.1, H1Y01354.1, H1Y01364.1, H1Y01377.1, H1Y01392.1, H1Y01397.1, H1Y01523.1, H1Y01534.1, H1Y01538.1, H1Y01542.1, H1Y01546.1, H1Y01557.1, H1Y01567.1, H1Y01573.1, H1Y01585.1, H1Y01586.1, H1Y01589.1, H1Y01600.1, H1Y01601.1, H1Y01616.1, H1Y01628.1, H1Y01647.1, H1Y…	H2Y00889.1, H2Y00893.1, H2Y00894.1, H2Y00896.1, H2Y00897.1, H2Y00902.1, H2Y00904.1, H2Y00907.1, H2Y00908.1, H2Y00912.1, H2Y00915.1, H2Y00921.1, H2Y00923.1, H2Y00930.1, H2Y00936.1, H2Y00941.1, H2Y05209.1, H2Y05212.1, H2Y05474.1, H2Y09402.1, H2Y10287.1, H2Y10288.1, H2Y10293.1, H2Y10974.1, H2Y10979.1, H2Y10985.1, H2Y10986.1, H2Y10987.1, H2Y10992.1, H2Y10993.1, H2Y10995.1, H2Y10997.1, H2Y10999.1, H2Y…
OG0012610		OG0000005	Aeg005010.1, Aeg005020.1, Aeg026690.1, Aeg027060.1, Aeg027100.1, Aeg027110.1, Aeg028010.1, Aeg028020.1, Aeg028050.1, Aeg030300.1, Aeg076590.1, Aeg082120.1, Aeg083300.1, Aeg131180.1, Aeg154830.1, Aeg204060.1, Aeg205110.1, Aeg206000.1, Aeg207270.1, Aeg207310.1, Aeg207320.1, Aeg207620.1, Aeg285250.1	Egl012760.1, Egl055120.1, Egl061450.1, Egl066180.1, Egl066210.1, Egl066220.1, Egl068030.1, Egl089980.1, Egl096000.1, Egl103610.1, Egl120010.1, Egl142400.1, Egl160400.1, Egl177110.1, Egl197430.1, Egl200850.1, Egl201300.1, Egl201340.1, Egl201350.1, Egl210750.1, Egl213060.1, Egl213070.1, Egl213100.1, Egl234640.1, Egl235740.1, Egl285390.1, Egl288090.1	Citropsis010500.1, Citropsis033160.1, Citropsis041510.1, Citropsis042660.1, Citropsis043730.1, Citropsis045230.1, Citropsis045280.1, Citropsis045290.1, Citropsis045610.1, Citropsis062950.1, Citropsis064160.1, Citropsis077720.1, Citropsis100400.1, Citropsis100440.1, Citropsis100450.1, Citropsis101410.1, Citropsis101450.1, Citropsis101750.1, Citropsis159050.1, Citropsis163830.1, Citropsis246350.1	CP1g003133.t1, CP3g000672.t1, CP3g003941.t1, CP5g000491.t1, CP6g001636.t1, CP6g001687.t1, CP6g001691.t1, CP6g001692.t1, CP6g001819.t1, CP6g001820.t1, CP6g001823.t1, CP6g002183.t1, CP7g002236.t1, CP7g003165.t1, CP7g003296.t1, CP8g002951.t1, CP8g002979.t1, CP8g002981.t1, CP8g002984.t1, CP8g003131.t1, CP8g003241.t1, CP8g003357.t1	Ciclev10003240m.1, Ciclev10003795m.1, Ciclev10011358m.1, Ciclev10011362m.1, Ciclev10011363m.1, Ciclev10011375m.1, Ciclev10011377m.1, Ciclev10011384m.1, Ciclev10011400m.1, Ciclev10013446m.1, Ciclev10018047m.1, Ciclev10023643m.1, Ciclev10025287m.1, Ciclev10028036m.1, Ciclev10028090m.1, Ciclev10028117m.1, Ciclev10030166m.1, Ciclev10030322m.1, Ciclev10031070m.1, Ciclev10031134m.1	Fh1g02830.1, Fh3g03480.1, Fh3g32760.1, Fh5g45070.1, Fh6g07360.1, Fh6g10920.1, Fh6g10950.1, Fh6g10960.1, Fh6g12180.1, Fh6g12190.1, Fh6g12230.1, Fh6g12740.1, Fh7g00990.1, Fh7g02210.1, Fh7g10020.1, Fh8g26220.1, Fh8g26540.1, Fh8g27910.1, Fh8g28980.1, Fh8g30040.1, FhUn01560.1	Chh004640.1, Chh018290.1, Chh018340.1, Chh018790.1, Chh041430.1, Chh041440.1, Chh078750.1, Chh082540.1, Chh112930.1, Chh122450.1, Chh154690.1, Chh188400.1, Chh188410.1, Chh188450.1, Chh240880.1, Chh242010.1, Chh243050.1, Chh244420.1, Chh244480.1, Chh244490.1, Chh244870.1, Chh300290.1, Chh301580.1	Abu1g_003040.1, Abu3g_002280.1, Abu3g_020860.1, Abu5g_004710.1, Abu6g_014590.1, Abu6g_014960.1, Abu6g_015000.1, Abu6g_015900.1, Abu6g_015910.1, Abu6g_015930.1, Abu6g_018400.1, Abu7g_001260.1, Abu7g_002490.1, Abu8g_009370.1, Abu8g_009690.1, Abu8g_009750.1, Abu8g_011060.1, Abu8g_011930.1, Abu8g_012980.1	HP026060.1, HP115580.1, HP116760.1, HP123470.1, HP146660.1, HP150630.1, HP155830.1, HP158490.1, HP158520.1, HP158530.1, HP159490.1, HP159500.1, HP159510.1, HP159550.1, HP159950.1, HP235910.1, HP251160.1, HP270750.1, HP272080.1, HP273190.1, HP274620.1, HP274670.1, HP275040.1	Cg1g004420.1, Cg2g013970.1, Cg3g019230.1, Cg4g011420.1, Cg4g014750.1, Cg6g001870.1, Cg6g004840.1, Cg6g004870.1, Cg6g004880.1, Cg6g005910.1, Cg6g005920.1, Cg6g005960.1, Cg6g006410.1, Cg7g000950.1, Cg7g002640.1, Cg8g021000.1, Cg8g021320.1, Cg8g021370.1, Cg8g022740.1, Cg8g023740.1, Cg8g024780.1	Cmt001010.1, Cmt002330.1, Cmt009670.1, Cmt050040.1, Cmt050400.1, Cmt050480.1, Cmt052820.1, Cmt053890.1, Cmt055060.1, Cmt097330.1, Cmt103240.1, Cmt103250.1, Cmt104110.1, Cmt127910.1, Cmt237250.1, Cmt237610.1, Cmt237650.1, Cmt237660.1, Cmt238540.1, Cmt238570.1, Cmt241550.1, Cmt249990.1	JLX028020.1, JLX128270.1, JLX173730.1, JLX182020.1	LW014950.1, LW027750.1, LW038410.1, LW038440.1, LW038450.1, LW039680.1, LW039690.1, LW039740.1, LW040200.1, LW079550.1, LW080640.1, LW082090.1, LW082130.1, LW082540.1, LW126740.1, LW164580.1, LW171720.1, LW176100.1, LW177300.1, LW275480.1, LW276570.1	Cms060830.1, Cms069420.1, Cms069470.1, Cms098280.1, Cms098320.1, Cms098710.1, Cms128760.1, Cms136570.1, Cms171170.1, Cms190050.1, Cms191210.1, Cms192510.1, Cms193630.1, Cms194680.1, Cms196090.1, Cms196140.1, Cms196530.1, Cms218940.1, Cms224680.1	Cm016540.1, Cm034660.1, Cm034670.1, Cm034700.1, Cm046510.1, Cm077460.1, Cm082510.1, Cm088180.1, Cm099840.1, Cm117780.1, Cm156660.1, Cm177760.1, Cm182060.1, Cm186190.1, Cm192410.1, Cm192450.1, Cm192460.1, Cm223540.1, Cm223550.1, Cm223610.1, Cm227740.1, Cm278230.1, Cm278880.1, Cm304880.1	Cs_ont_1g026870.1, Cs_ont_3g006580.1, Cs_ont_3g030680.1, Cs_ont_5g004780.1, Cs_ont_6g015400.1, Cs_ont_6g015870.1, Cs_ont_6g015920.1, Cs_ont_6g017100.1, Cs_ont_6g017110.1, Cs_ont_6g017140.1, Cs_ont_6g020500.1, Cs_ont_7g000920.1, Cs_ont_7g002240.1, Cs_ont_7g009730.1, Cs_ont_8g001090.1, Cs_ont_8g002200.1, Cs_ont_8g003710.1, Cs_ont_8g003760.1, Cs_ont_8g004070.1, Cs_ont_Un006090.1	SYT042550.1, SYT067240.1, SYT068890.1, SYT111270.1, SYT142370.1, SYT175530.1, SYT176580.1, SYT182630.1, SYT185180.1, SYT193570.1, SYT194550.1, SYT195430.1, SYT196660.1, SYT196700.1, SYT196930.1, SYT220180.1, SYT220220.1, SYT220230.1, SYT226380.1, SYT226420.1, SYT226430.1, SYT227260.1, SYT227270.1, SYT227300.1, SYT248580.1	Cic231630.1	Pt3g033930.1, Pt4g021050.1, Pt4g022270.1, Pt5g005740.1, Pt5g022220.1, Pt6g013530.1, Pt6g013970.1, Pt6g013980.1, Pt6g014950.1, Pt6g014960.1, Pt6g014990.1, Pt6g018020.1, Pt7g018900.1, Pt8g008950.1, Pt8g009200.1, Pt8g009210.1, Pt8g009230.1, Pt8g009260.1, Pt8g010540.1, Pt8g011530.1, Pt8g012550.1, PtUn005300.1, PtUn034010.1	H1Y05479.1, H1Y11398.1, H1Y15229.1, H1Y20253.1, H1Y28234.1, H1Y28285.1, H1Y28289.1, H1Y28290.1, H1Y28448.1, H1Y28449.1, H1Y28452.1, H1Y28933.1, H1Y30047.1, H1Y30203.1, H1Y31361.1, H1Y33920.1, H1Y34044.1, H1Y34179.1, H1Y34340.1, H1Y34347.1, H1Y34385.1	H2Y05109.1, H2Y11112.1, H2Y14691.1, H2Y17072.1, H2Y19945.1, H2Y28032.1, H2Y28089.1, H2Y28094.1, H2Y28097.1, H2Y28235.1, H2Y28236.1, H2Y28239.1, H2Y28720.1, H2Y29817.1, H2Y29967.1, H2Y31008.1, H2Y33492.1, H2Y33619.1, H2Y33762.1, H2Y33917.1, H2Y33923.1, H2Y33959.1
OG0012611		OG0000006	Aeg172780.1	Egl036830.1, Egl036990.1, Egl072170.1, Egl080420.1, Egl080450.1, Egl194350.1, Egl194380.1, Egl241970.1, Egl241980.1, Egl242010.1, Egl309260.1	Citropsis092640.1, Citropsis092690.1, Citropsis092740.1, Citropsis144820.1, Citropsis191420.1, Citropsis191480.1, Citropsis240770.1, Citropsis240800.1, Citropsis240840.1, Citropsis255690.1, Citropsis255720.1, Citropsis274830.1, Citropsis274850.1, Citropsis274860.1, Citropsis274880.1, Citropsis274900.1	CP3g001789.t1, CP3g001806.t1, CP3g001814.t1, CP3g001820.t1, CP3g001821.t1, CP3g001822.t1, CP3g001827.t1, CP3g001830.t1, CP3g002718.t1, CP3g002720.t1, CP3g002724.t1, CP3g002725.t1, CP3g002729.t1, CP3g002731.t1, CP3g002732.t1, CP3g002737.t1, CP3g002740.t1, CP3g002750.t1, CP3g002763.t1, CP3g002785.t1, CP3g002788.t1, CP3g002790.t1, CP3g002792.t1, CP3g002795.t1, CP3g002797.t1, CP3g002800.t1, CP3g00280…	Ciclev10000055m.1, Ciclev10000123m.1, Ciclev10000136m.1, Ciclev10000151m.1, Ciclev10000198m.1, Ciclev10000221m.1, Ciclev10000228m.1, Ciclev10000946m.1, Ciclev10003128m.1, Ciclev10003164m.1, Ciclev10003188m.1, Ciclev10003283m.1, Ciclev10003505m.1, Ciclev10003533m.1, Ciclev10003569m.1, Ciclev10003644m.1, Ciclev10003865m.1, Ciclev10003894m.1, Ciclev10004003m.1, Ciclev10004038m.1, Ciclev10004049m.1, …	Fh3g13490.1, Fh3g13510.1, Fh3g13520.1, Fh3g13580.1, Fh3g13590.1, Fh3g13640.1, Fh3g13660.1, Fh3g13680.1, Fh3g13720.1, Fh3g13750.1, Fh3g13760.1, Fh3g13770.1, Fh3g13800.1, Fh3g13810.1, Fh3g13870.1, Fh3g13890.1, Fh3g13920.1, Fh3g13950.1, Fh3g13960.1, Fh3g13970.1, Fh3g13980.1, Fh3g13990.1, Fh3g14010.1, Fh3g14040.1, Fh3g22410.1, Fh3g22500.1, Fh3g22510.1, Fh3g22610.1, Fh3g22640.1, Fh3g22670.1, Fh3g22690…	Chh059430.1, Chh059440.1, Chh092940.1, Chh092980.1, Chh096730.1, Chh099330.1, Chh099340.1, Chh099380.1, Chh108270.1, Chh108280.1, Chh148050.1, Chh148070.1, Chh194170.1, Chh196430.1, Chh196440.1, Chh196460.1, Chh196470.1, Chh196490.1, Chh196500.1, Chh196510.1, Chh273510.1	Abu3g_011470.1, Abu7g_005220.1, Abu8g_022010.1	HP006180.1, HP006190.1, HP150680.1, HP154750.1	Cg1g011190.1, Cg1g011200.1, Cg1g011210.1, Cg1g011230.1, Cg1g011270.1, Cg1g011280.1, Cg1g011310.1, Cg1g011340.1, Cg1g011350.1, Cg1g011370.1, Cg1g011380.1, Cg1g011390.1, Cg1g022630.1, Cg1g024640.1, Cg1g024660.1, Cg2g030670.1, Cg2g030680.1, Cg2g030700.1, Cg2g030790.1, Cg3g002920.1, Cg3g002940.1, Cg3g002980.1, Cg3g003020.1, Cg3g004700.1, Cg3g004730.1, Cg3g004750.1, Cg3g004770.1, Cg3g004790.1, Cg3g004…	Cmt083940.1	JLX005100.1, JLX006940.1, JLX042180.1, JLX077450.1, JLX123110.1, JLX123830.1, JLX124780.1, JLX125450.1, JLX127690.1, JLX129200.1, JLX129770.1, JLX133650.1, JLX134790.1, JLX134920.1, JLX164870.1, JLX164950.1, JLX168190.1	LW097040.1, LW100570.1, LW100590.1, LW100700.1, LW100780.1, LW100810.1, LW112400.1, LW140640.1, LW140690.1, LW151340.1, LW151390.1, LW313390.1	Cms049220.1, Cms049230.1, Cms126990.1, Cms280870.1, Cms280900.1, Cms280910.1, Cms280920.1, Cms280940.1, Cms280970.1, Cms280990.1		Cs_ont_3g016770.1, Cs_ont_3g016780.1, Cs_ont_5g019690.1	SYT003170.1, SYT047250.1, SYT047260.1, SYT047270.1, SYT047290.1, SYT218750.1, SYT218760.1, SYT218770.1, SYT218790.1, SYT219840.1, SYT219960.1, SYT224550.1	Cic012860.1, Cic012950.1, Cic012960.1, Cic012980.1, Cic013010.1, Cic013020.1, Cic013040.1, Cic013050.1, Cic013060.1, Cic116170.1, Cic215200.1, Cic215210.1, Cic215230.1, Cic222090.1, Cic262740.1, Cic262770.1, Cic275130.1, Cic275240.1	Pt3g023910.1, Pt3g027640.1, Pt3g027650.1, Pt5g014130.1, Pt5g014170.1, Pt5g014190.1, Pt5g014200.1, Pt6g019420.1, Pt6g019430.1, Pt6g019440.1, PtUn009780.1, PtUn009820.1, PtUn009830.1, PtUn009850.1, PtUn009870.1, PtUn009880.1, PtUn013270.1, PtUn013310.1, PtUn023860.1, PtUn023880.1, PtUn025190.1, PtUn025200.1, PtUn025220.1, PtUn025230.1, PtUn025260.1, PtUn029990.1, PtUn030020.1, PtUn030050.1, PtUn030…	H1Y12596.1, H1Y12614.1, H1Y12617.1, H1Y12625.1, H1Y12627.1, H1Y12629.1, H1Y12630.1, H1Y12631.1, H1Y12634.1, H1Y12638.1, H1Y13723.1, H1Y13727.1, H1Y13731.1, H1Y13732.1, H1Y13738.1, H1Y13742.1, H1Y13744.1, H1Y13745.1, H1Y13746.1, H1Y13748.1, H1Y13752.1, H1Y13754.1, H1Y13755.1, H1Y13757.1, H1Y13760.1, H1Y13768.1, H1Y13771.1, H1Y13773.1, H1Y13775.1, H1Y13777.1, H1Y13781.1, H1Y13785.1, H1Y21399.1, H1Y…	H2Y00025.1, H2Y02407.1, H2Y02417.1, H2Y09795.1, H2Y12248.1, H2Y12250.1, H2Y12252.1, H2Y12253.1, H2Y13295.1, H2Y13300.1, H2Y13301.1, H2Y13303.1, H2Y13305.1, H2Y13307.1, H2Y13312.1, H2Y13314.1, H2Y13317.1, H2Y13327.1, H2Y13329.1, H2Y13330.1, H2Y13331.1, H2Y13333.1, H2Y13341.1, H2Y13350.1, H2Y13354.1, H2Y13356.1, H2Y13358.1, H2Y13359.1, H2Y13361.1, H2Y13363.1, H2Y13366.1, H2Y13370.1, H2Y21097.1, H2Y…
OG0012613		OG0000007	Aeg007390.1	Egl001990.1, Egl003570.1, Egl019110.1, Egl063760.1, Egl063780.1, Egl077930.1, Egl080550.1, Egl110770.1, Egl110780.1, Egl119790.1, Egl120600.1, Egl125200.1, Egl125220.1, Egl126210.1, Egl126220.1, Egl126230.1, Egl152060.1, Egl152070.1, Egl160650.1, Egl160660.1, Egl161060.1, Egl161650.1, Egl161660.1, Egl162540.1, Egl172060.1, Egl172070.1, Egl172080.1, Egl179000.1, Egl206150.1, Egl206160.1, Egl229620…	Citropsis018300.1, Citropsis048050.1, Citropsis049340.1, Citropsis052770.1, Citropsis143940.1, Citropsis174080.1, Citropsis182550.1, Citropsis214680.1, Citropsis226800.1, Citropsis236560.1, Citropsis274820.1, Citropsis280760.1	CP1g000999.t1, CP2g002056.t1, CP2g002082.t1, CP2g002528.t1, CP2g002530.t1, CP2g002626.t1, CP3g003418.t1, CP3g003419.t1, CP4g001157.t1, CP5g003377.t1, CP5g005239.t1, CP6g002441.t1, CP6g002733.t1, CP7g002211.t1, CP7g002978.t1, CP7g002979.t1, CP8g002155.t1, CP8g002156.t1, CP8g002341.t1, CP8g002500.t1	Ciclev10010226m.1, Ciclev10013892m.1, Ciclev10018025m.1, Ciclev10018266m.1, Ciclev10023561m.1, Ciclev10024536m.1, Ciclev10027349m.1	Fh1g15900.1, Fh1g21980.1, Fh2g18870.1, Fh2g21210.1, Fh3g17440.1, Fh3g18370.1, Fh3g19710.1, Fh3g21580.1, Fh4g15960.1, Fh5g35870.1, Fh6g05780.1, Fh6g15450.1, Fh7g10190.1, Fh7g10480.1, Fh7g13110.1, Fh7g17000.1, Fh7g17010.1, Fh7g17230.1, Fh7g23120.1, Fh8g18460.1, Fh8g19470.1, Fh8g20740.1, FhUn02680.1, FhUn04140.1, FhUn09490.1	Chh028510.1, Chh028520.1, Chh031500.1, Chh031510.1, Chh033600.1, Chh033610.1, Chh054040.1, Chh054050.1, Chh068480.1, Chh069660.1, Chh127160.1, Chh150600.1, Chh249890.1, Chh249910.1, Chh249920.1, Chh253500.1, Chh253510.1, Chh254120.1, Chh254130.1, Chh256840.1, Chh281850.1, Chh281860.1, Chh283100.1, Chh283110.1	Abu1g_019660.1, Abu2g_012280.1, Abu2g_012290.1, Abu3g_010850.1, Abu3g_016770.1, Abu4g_006970.1, Abu5g_046430.1, Abu7g_001410.1, Abu7g_001420.1, Abu7g_010170.1, Abu8g_005760.1, Abu8g_005950.1, Abu8g_022080.1	HP093550.1, HP130110.1, HP205150.1, HP282870.1	Cg2g011830.1, Cg2g011840.1, Cg2g011850.1, Cg2g019020.1, Cg2g026510.1, Cg2g029810.1, Cg2g033220.1, Cg5g018000.1, Cg5g018910.1, Cg5g019540.1, Cg5g019550.1, Cg8g009270.1, Cg8g009580.1, Cg8g009590.1, Cg8g010120.1, Cg8g010130.1, Cg8g010820.1, Cg9g020750.1, Cg9g022000.1, CgUng000110.1, CgUng010580.1, CgUng015470.1, CgUng022080.1	Cmt010860.1, Cmt043680.1, Cmt047920.1, Cmt075580.1, Cmt103140.1, Cmt103150.1, Cmt104780.1, Cmt114510.1, Cmt114520.1, Cmt115450.1, Cmt120150.1, Cmt120160.1, Cmt120170.1, Cmt142030.1, Cmt142760.1, Cmt151080.1, Cmt176620.1, Cmt204960.1, Cmt242810.1, Cmt242820.1	JLX007020.1, JLX027450.1, JLX036080.1, JLX052610.1, JLX072800.1, JLX158620.1, JLX172930.1, JLX173060.1, JLX173890.1, JLX198430.1, JLX202790.1	LW027270.1, LW113260.1, LW134270.1, LW148970.1, LW148980.1, LW148990.1, LW150180.1, LW150430.1, LW150440.1, LW161700.1, LW162440.1, LW164790.1, LW180300.1, LW180310.1, LW193150.1, LW203770.1, LW223000.1, LW231520.1, LW249660.1, LW249680.1, LW259500.1, LW259510.1, LW263320.1, LW263330.1, LW270440.1, LW305930.1	Cms022890.1, Cms051320.1, Cms069740.1, Cms118590.1, Cms118600.1, Cms124690.1, Cms128480.1, Cms128490.1, Cms128500.1, Cms131080.1, Cms135830.1, Cms152200.1, Cms154100.1, Cms159290.1, Cms167880.1, Cms167890.1, Cms199550.1, Cms209210.1, Cms214660.1, Cms223640.1, Cms237000.1, Cms237010.1, Cms238210.1, Cms281550.1	Cm024120.1, Cm048300.1, Cm053160.1, Cm078710.1, Cm083340.1, Cm089560.1, Cm089570.1, Cm097320.1, Cm097330.1, Cm116740.1, Cm126960.1, Cm138590.1, Cm145860.1, Cm208300.1, Cm208310.1, Cm222250.1, Cm222320.1, Cm227280.1, Cm227290.1, Cm241110.1, Cm241120.1, Cm241130.1, Cm254050.1, Cm269820.1, Cm301890.1, Cm311390.1, Cm314100.1, Cm324800.1	Cs_ont_1g002320.1, Cs_ont_1g002330.1, Cs_ont_1g002340.1, Cs_ont_1g009690.1, Cs_ont_2g018250.1, Cs_ont_2g018530.1, Cs_ont_2g021620.1, Cs_ont_2g022360.1, Cs_ont_2g023190.1, Cs_ont_2g027490.1, Cs_ont_3g031430.1, Cs_ont_4g018210.1, Cs_ont_5g032010.1, Cs_ont_5g032020.1, Cs_ont_6g022940.1, Cs_ont_7g009020.1, Cs_ont_7g009990.1, Cs_ont_7g011880.1, Cs_ont_7g021450.1, Cs_ont_8g012980.1, Cs_ont_8g012990.1, …	SYT119650.1, SYT122180.1, SYT123010.1, SYT145300.1, SYT145310.1, SYT172430.1	Cic002000.1, Cic004580.1, Cic014430.1, Cic029510.1, Cic048910.1, Cic048920.1, Cic051240.1, Cic051250.1, Cic056350.1, Cic114960.1, Cic114970.1, Cic159640.1, Cic159660.1, Cic167360.1, Cic167370.1, Cic177200.1, Cic185000.1, Cic185720.1, Cic187530.1, Cic188640.1, Cic188650.1, Cic218630.1, Cic218640.1, Cic218650.1, Cic272230.1	Pt2g010740.1, Pt2g011780.1, Pt5g014620.1, Pt5g024620.1, Pt7g013790.1, PtUn006500.1, PtUn006620.1, PtUn016910.1, PtUn035260.1	H1Y02334.1, H1Y02335.1, H1Y02337.1, H1Y03177.1, H1Y03222.1, H1Y03223.1, H1Y04889.1, H1Y07656.1, H1Y08209.1, H1Y08248.1, H1Y08844.1, H1Y08847.1, H1Y08989.1, H1Y09178.1, H1Y09179.1, H1Y09180.1, H1Y11558.1, H1Y12745.1, H1Y14516.1, H1Y15651.1, H1Y18407.1, H1Y22513.1, H1Y22514.1, H1Y23571.1, H1Y29329.1, H1Y30426.1, H1Y30427.1, H1Y31392.1, H1Y31393.1, H1Y31394.1, H1Y39009.1, H1Y40879.1, H1Y40880.1	H2Y02123.1, H2Y02730.1, H2Y02731.1, H2Y03028.1, H2Y07712.1, H2Y07713.1, H2Y08515.1, H2Y09096.1, H2Y09097.1, H2Y11889.1, H2Y13241.1, H2Y14754.1, H2Y17455.1, H2Y17456.1, H2Y23430.1, H2Y23852.1, H2Y29033.1, H2Y29035.1, H2Y31331.1, H2Y31396.1, H2Y34860.1, H2Y34862.1, H2Y41143.1
OG0012616		OG0000008	Aeg118480.1	Egl006310.1, Egl016540.1, Egl020440.1, Egl025050.1, Egl034820.1, Egl039950.1, Egl065230.1, Egl070920.1, Egl073860.1, Egl105140.1, Egl110860.1, Egl111160.1, Egl116710.1, Egl157990.1, Egl164660.1, Egl170730.1, Egl177190.1, Egl177480.1, Egl196440.1, Egl220900.1, Egl273830.1, Egl275020.1, Egl278790.1	Citropsis002600.1, Citropsis021180.1, Citropsis068460.1, Citropsis079590.1, Citropsis080480.1, Citropsis104950.1, Citropsis120040.1, Citropsis138920.1, Citropsis159900.1, Citropsis176740.1, Citropsis177150.1, Citropsis191910.1, Citropsis213830.1, Citropsis218460.1, Citropsis231110.1, Citropsis234690.1, Citropsis260040.1, Citropsis260310.1, Citropsis266260.1, Citropsis274440.1	CP2g001119.t1, CP2g001617.t1, CP2g002567.t1, CP2g002568.t1, CP3g003080.t1, CP5g003672.t1, CP5g003931.t1, CP5g004018.t1, CP6g001451.t1, CP6g002107.t1, CP6g002307.t1, CP8g000353.t1, CP8g001723.t1, CP9g000375.t1, CP9g001074.t1, CP9g001672.t1, CP9g002398.t1		Fh1g10810.1, Fh2g11830.1, Fh3g20670.1, Fh3g33310.1, Fh4g14260.1, Fh8g20370.1	Chh011220.1, Chh046310.1, Chh047510.1, Chh055200.1, Chh076430.1, Chh082510.1, Chh089920.1, Chh100730.1, Chh111910.1, Chh147280.1, Chh151920.1, Chh160960.1, Chh166220.1, Chh176240.1, Chh196830.1, Chh208390.1, Chh210180.1, Chh231450.1, Chh232440.1, Chh232830.1, Chh235100.1, Chh235980.1, Chh236740.1, Chh256450.1, Chh260550.1, Chh284310.1	Abu1g_021580.1, Abu3g_006590.1, Abu5g_040670.1, Abu6g_019390.1, Abu7g_009020.1, Abuscaffold_173_000010.1	HP023270.1, HP037100.1, HP050070.1, HP120710.1, HP128820.1, HP132690.1, HP155980.1, HP156290.1, HP190840.1, HP199730.1	Cg1g012630.1, Cg5g018770.1	Cmt008010.1, Cmt038200.1, Cmt039560.1, Cmt042040.1, Cmt044490.1, Cmt045680.1, Cmt053940.1, Cmt068220.1, Cmt072650.1, Cmt073410.1, Cmt076830.1, Cmt081790.1, Cmt102880.1, Cmt102890.1, Cmt106890.1, Cmt116760.1, Cmt141410.1, Cmt143640.1, Cmt148760.1, Cmt181290.1, Cmt205110.1, Cmt205940.1, Cmt209310.1, Cmt209690.1, Cmt242180.1, Cmt252200.1, Cmt268930.1	JLX227940.1	LW001590.1, LW001600.1, LW015660.1, LW016890.1, LW025800.1, LW038500.1, LW044910.1, LW044920.1, LW086480.1, LW099230.1, LW103290.1, LW110160.1, LW157300.1, LW160370.1, LW164560.1, LW165580.1, LW167600.1, LW169950.1, LW206860.1, LW246230.1, LW246240.1, LW248050.1, LW251470.1, LW254300.1, LW254320.1, LW257960.1, LW263680.1, LW265120.1, LW266090.1, LW277850.1, LW279020.1, LW285790.1, LW308360.1, LW3…	Cms001900.1, Cms010910.1, Cms017940.1, Cms042590.1, Cms048520.1, Cms064410.1, Cms078300.1, Cms095370.1, Cms097280.1, Cms102150.1, Cms118110.1, Cms119320.1, Cms126580.1, Cms128840.1, Cms130980.1, Cms134890.1, Cms148540.1, Cms149660.1, Cms154250.1, Cms159130.1, Cms163230.1, Cms166980.1, Cms185180.1, Cms192320.1, Cms212120.1, Cms218180.1, Cms233700.1, Cms241230.1, Cms249260.1, Cms278310.1, Cms281810…	Cm055560.1, Cm146250.1, Cm147240.1, Cm154070.1, Cm181590.1, Cm185220.1, Cm209810.1, Cm244760.1, Cm271570.1	Cs_ont_2g022680.1, Cs_ont_3g000710.1, Cs_ont_5g000860.1, Cs_ont_5g020550.1, Cs_ont_5g027850.1, Cs_ont_5g030860.1, Cs_ont_5g030890.1, Cs_ont_5g035760.1, Cs_ont_5g037800.1, Cs_ont_5g038370.1, Cs_ont_5g038390.1, Cs_ont_6g013690.1, Cs_ont_6g019750.1, Cs_ont_6g021610.1, Cs_ont_6g023160.1, Cs_ont_7g008510.1, Cs_ont_7g016750.1, Cs_ont_8g009130.1, Cs_ont_8g009680.1, Cs_ont_8g024170.1, Cs_ont_9g003580.1, …		Cic011930.1, Cic011940.1, Cic028560.1, Cic030580.1, Cic030950.1, Cic032620.1, Cic032660.1, Cic051420.1, Cic055960.1, Cic061160.1, Cic068170.1, Cic069880.1, Cic072240.1, Cic074830.1, Cic074840.1, Cic094290.1, Cic119850.1, Cic122450.1, Cic142860.1, Cic145130.1, Cic149500.1, Cic162720.1, Cic166230.1, Cic168960.1, Cic186610.1, Cic187280.1, Cic210730.1, Cic211330.1, Cic215860.1, Cic240470.1, Cic240480…	Pt3g017610.1, Pt4g010700.1, Pt4g014400.1, Pt5g024840.1, Pt9g011220.1, PtUn021070.1	H1Y02013.1, H1Y02423.1, H1Y03003.1, H1Y07628.1, H1Y08904.1, H1Y08905.1, H1Y09165.1, H1Y09415.1, H1Y09507.1, H1Y10983.1, H1Y11902.1, H1Y12820.1, H1Y13958.1, H1Y14134.1, H1Y17319.1, H1Y17636.1, H1Y17906.1, H1Y18751.1, H1Y21366.1, H1Y21545.1, H1Y22389.1, H1Y22390.1, H1Y23395.1, H1Y23596.1, H1Y23597.1, H1Y23857.1, H1Y24404.1, H1Y24509.1, H1Y28021.1, H1Y28831.1, H1Y29102.1, H1Y29307.1, H1Y30820.1, H1Y…	H2Y07593.1, H2Y07954.1, H2Y08698.1, H2Y08750.1, H2Y10151.1, H2Y12417.1, H2Y13084.1, H2Y13093.1, H2Y13695.1, H2Y13696.1, H2Y14421.1, H2Y14813.1, H2Y16066.1, H2Y16306.1, H2Y16384.1, H2Y16787.1, H2Y17239.1, H2Y17428.1, H2Y18183.1, H2Y21062.1, H2Y21839.1, H2Y22265.1, H2Y22340.1, H2Y22608.1, H2Y23135.1, H2Y23136.1, H2Y23311.1, H2Y23655.1, H2Y23656.1, H2Y24446.1, H2Y24447.1, H2Y24758.1, H2Y28864.1, H2Y…
OG0012618		OG0000009	Aeg019810.1, Aeg019820.1, Aeg032770.1, Aeg032790.1, Aeg059610.1, Aeg077230.1, Aeg194730.1, Aeg204810.1, Aeg222650.1, Aeg224220.1, Aeg275100.1, Aeg276850.1	Egl016210.1, Egl061390.1, Egl061570.1, Egl061580.1, Egl071710.1, Egl106700.1, Egl151210.1, Egl151220.1, Egl204890.1, Egl204950.1, Egl234950.1, Egl255260.1, Egl270850.1, Egl280730.1	Citropsis023940.1, Citropsis026720.1, Citropsis042320.1, Citropsis046540.1, Citropsis057560.1, Citropsis108300.1, Citropsis108310.1, Citropsis108320.1, Citropsis152890.1, Citropsis186130.1, Citropsis191240.1, Citropsis191320.1, Citropsis191630.1, Citropsis191660.1, Citropsis217240.1, Citropsis218540.1, Citropsis218550.1, Citropsis218560.1, Citropsis218570.1, Citropsis218580.1, Citropsis220560.1, …	CP1g001920.t1, CP1g001921.t1, CP1g001922.t1, CP1g001923.t1, CP1g001925.t1, CP1g001926.t1, CP1g001927.t1, CP1g001928.t1, CP1g001929.t1, CP1g001930.t1, CP1g002198.t1, CP4g002500.t1, CP4g002894.t1, CP5g003353.t1, CP5g003654.t1, CP5g003971.t1, CP6g000812.t1, CP6g000813.t1, CP6g000814.t1, CP6g002776.t1, CP6g002816.t1, CP6g002824.t1, CP7g002382.t1, CP8g002847.t1, CP8g003273.t1, CP9g000046.t1	Ciclev10004151m.1, Ciclev10007249m.1, Ciclev10007262m.1, Ciclev10007264m.1, Ciclev10007275m.1, Ciclev10007285m.1, Ciclev10007307m.1, Ciclev10007336m.1, Ciclev10010431m.1, Ciclev10010901m.1, Ciclev10010902m.1, Ciclev10010903m.1, Ciclev10010905m.1, Ciclev10010913m.1, Ciclev10010929m.1, Ciclev10013618m.1, Ciclev10018487m.1, Ciclev10024261m.1, Ciclev10024400m.1, Ciclev10024468m.1, Ciclev10024697m.1, …	Fh1g11880.1, Fh1g14120.1, Fh1g14130.1, Fh1g14140.1, Fh1g14150.1, Fh1g14160.1, Fh1g14170.1, Fh1g14180.1, Fh1g14190.1, Fh1g14200.1, Fh1g14210.1, Fh1g16340.1, Fh4g03340.1, Fh4g07130.1, Fh5g15910.1, Fh5g19100.1, Fh5g22470.1, Fh5g22500.1, Fh6g01090.1, Fh6g01140.1, Fh6g01490.1, Fh6g20270.1, Fh6g20280.1, Fh6g20290.1, Fh7g08390.1, Fh8g25360.1, Fh8g29260.1, Fh9g00370.1, FhUn10730.1	Chh046580.1, Chh087010.1, Chh090730.1, Chh095830.1, Chh095870.1, Chh095940.1, Chh095960.1, Chh095970.1, Chh163030.1, Chh181210.1, Chh199560.1, Chh199580.1, Chh199590.1, Chh241700.1, Chh245840.1, Chh245860.1	Abu1g_012260.1, Abu1g_014130.1, Abu4g_007250.1, Abu5g_030600.1, Abu6g_007400.1, Abu6g_021450.1, Abu6g_021500.1, Abu6g_021510.1, Abu7g_008060.1, Abu8g_008530.1, Abu8g_012210.1, Abu8g_012260.1, Abu9g_000940.1	HP000780.1, HP000790.1, HP000800.1, HP000820.1, HP059330.1, HP059340.1, HP059510.1, HP059530.1, HP059550.1, HP110010.1, HP112210.1, HP122520.1, HP122530.1, HP129980.1, HP135720.1, HP135730.1, HP135740.1, HP137960.1, HP167280.1, HP197560.1, HP201090.1, HP234600.1, HP253200.1, HP271690.1, HP271780.1, HP286380.1	Cg5g013710.1, Cg6g016060.1, Cg6g016070.1, Cg9g000380.1	Cmt158500.1, Cmt245070.1	JLX038000.1, JLX054500.1, JLX066170.1, JLX076950.1, JLX082900.1, JLX095980.1, JLX101550.1, JLX102760.1, JLX103860.1, JLX148760.1, JLX166760.1, JLX167850.1, JLX175980.1, JLX178000.1, JLX207980.1, JLX209120.1, JLX209250.1, JLX209290.1, JLX209480.1, JLX209700.1, JLX214720.1, JLX221120.1, JLX232400.1, JLX232830.1, JLX232850.1, JLX232960.1	LW005940.1, LW005950.1, LW023750.1, LW097820.1, LW141470.1, LW154470.1, LW182070.1, LW194380.1, LW218530.1, LW260630.1, LW313050.1, LW313280.1, LW313300.1	Cms023270.1, Cms052540.1, Cms074660.1, Cms105380.1, Cms117880.1, Cms126770.1, Cms168690.1, Cms197580.1	Cm221020.1	Cs_ont_1g015000.1, Cs_ont_1g015010.1, Cs_ont_1g017480.1, Cs_ont_4g003330.1, Cs_ont_4g006950.1, Cs_ont_5g031640.1, Cs_ont_5g034490.1, Cs_ont_6g007610.1, Cs_ont_6g007620.1, Cs_ont_6g007640.1, Cs_ont_6g025660.1, Cs_ont_6g025850.1, Cs_ont_6g025920.1, Cs_ont_8g000760.1, Cs_ont_8g005110.1, Cs_ont_9g000400.1	SYT015260.1, SYT022690.1, SYT062670.1, SYT074010.1, SYT083850.1, SYT100310.1, SYT100330.1, SYT107420.1, SYT157660.1, SYT157670.1, SYT182030.1, SYT194270.1	Cic004190.1, Cic060510.1, Cic064120.1, Cic103520.1, Cic131080.1, Cic131120.1, Cic173120.1, Cic173140.1, Cic173180.1	Pt1g002670.1, Pt1g005830.1, Pt3g014400.1, Pt3g016000.1, Pt3g017780.1, Pt4g015900.1, Pt6g006930.1, Pt6g006940.1, Pt6g019550.1, Pt6g019560.1, Pt6g019670.1, Pt7g007880.1, Pt7g008380.1, Pt7g008390.1, Pt7g008400.1, Pt7g008410.1, Pt7g008420.1, Pt7g008440.1, Pt7g008450.1, Pt7g008460.1, Pt7g008470.1, Pt7g008480.1, Pt7g010960.1, Pt8g008120.1, Pt8g011810.1, Pt9g000390.1	H1Y04092.1, H1Y04093.1, H1Y04095.1, H1Y04096.1, H1Y04098.1, H1Y04100.1, H1Y04101.1, H1Y04102.1, H1Y04103.1, H1Y04104.1, H1Y04420.1, H1Y16201.1, H1Y16642.1, H1Y23545.1, H1Y23547.1, H1Y24026.1, H1Y24465.1, H1Y27317.1, H1Y27318.1, H1Y27322.1, H1Y29728.1, H1Y29796.1, H1Y29799.1, H1Y31141.1, H1Y34009.1, H1Y34498.1	H2Y03687.1, H2Y03688.1, H2Y03690.1, H2Y03692.1, H2Y03693.1, H2Y03694.1, H2Y03695.1, H2Y03696.1, H2Y03697.1, H2Y04044.1, H2Y15611.1, H2Y15627.1, H2Y16072.1, H2Y23276.1, H2Y23804.1, H2Y24258.1, H2Y27143.1, H2Y27144.1, H2Y27147.1, H2Y29593.1, H2Y29597.1, H2Y29611.1, H2Y29614.1, H2Y30814.1, H2Y33583.1, H2Y34058.1
OG0012621		OG0000010	Aeg083340.1, Aeg229700.1, Aeg229720.1, Aeg229730.1, Aeg229750.1, Aeg229770.1, Aeg229780.1	Egl147380.1, Egl228140.1, Egl228250.1, Egl276580.1, Egl276600.1, Egl276610.1, Egl276620.1, Egl276630.1, Egl276640.1, Egl276660.1	Citropsis018810.1, Citropsis018830.1, Citropsis018860.1, Citropsis018870.1, Citropsis018880.1, Citropsis018890.1, Citropsis018910.1	CP2g003107.t1, CP2g003108.t1, CP9g000749.t1, CP9g000750.t1, CP9g000753.t1, CP9g000755.t1, CP9g000756.t1, CP9g000757.t1, CP9g000763.t1, CP9g000764.t1, CP9g000765.t1, CP9g000768.t1, CP9g001188.t1, CP9g001197.t1, CP9g001201.t1, CP9g001204.t1, CP9g001210.t1, CP9g001212.t1, CP9g001215.t1, CP9g001216.t1	Ciclev10004518m.1, Ciclev10004657m.1, Ciclev10004698m.1, Ciclev10004701m.1, Ciclev10004944m.1, Ciclev10005654m.1, Ciclev10005972m.1, Ciclev10006407m.1, Ciclev10006516m.1, Ciclev10006527m.1, Ciclev10006548m.1, Ciclev10006739m.1, Ciclev10006836m.1, Ciclev10006947m.1, Ciclev10006968m.1, Ciclev10007017m.1, Ciclev10007078m.1, Ciclev10007140m.1, Ciclev10015869m.1, Ciclev10016608m.1	Fh2g08470.1, Fh6g06990.1, Fh9g06880.1, Fh9g06890.1, Fh9g06900.1, Fh9g06910.1, Fh9g06920.1, Fh9g06950.1, Fh9g06980.1, Fh9g06990.1, Fh9g07000.1, Fh9g11090.1, Fh9g11130.1, Fh9g11140.1, Fh9g11180.1, Fh9g11190.1, Fh9g11220.1	Chh027590.1, Chh027600.1, Chh027610.1, Chh027630.1, Chh027640.1, Chh027650.1, Chh027660.1, Chh027670.1, Chh027680.1, Chh027690.1, Chh027710.1, Chh042520.1, Chh042540.1, Chh042600.1, Chh084300.1, Chh084350.1, Chh084360.1, Chh084400.1, Chh084410.1, Chh084450.1, Chh084480.1, Chh084490.1, Chh084540.1, Chh084590.1, Chh227070.1, Chh253040.1, Chh253050.1, Chh253060.1, Chh306660.1, Chh306680.1, Chh306690…	Abu9g_006980.1, Abu9g_007000.1, Abu9g_007040.1, Abu9g_007070.1, Abu9g_007100.1, Abu9g_007120.1, Abu9g_007140.1, Abu9g_007160.1, Abu9g_007180.1, Abu9g_007220.1, Abu9g_010340.1, Abu9g_010810.1, Abu9g_010820.1, Abu9g_010830.1	HP228340.1, HP228390.1, HP228410.1, HP258780.1, HP259500.1, HP259550.1, HP259610.1, HP259620.1, HP259640.1, HP259660.1, HP259710.1, HP259730.1, HP259750.1, HP259760.1, HP259790.1, HP262460.1, HP262470.1, HP262480.1, HP262520.1, HP262540.1, HP262600.1, HP289330.1, HP289340.1, HP289350.1	Cg9g006840.1, Cg9g006900.1, Cg9g006950.1, Cg9g007000.1, Cg9g007040.1		JLX010140.1, JLX050240.1, JLX050500.1, JLX050710.1, JLX051060.1, JLX051210.1, JLX051370.1, JLX051490.1, JLX051620.1, JLX051730.1, JLX051930.1, JLX052020.1, JLX052090.1, JLX086600.1, JLX088290.1, JLX165820.1, JLX166090.1, JLX166100.1	LW233870.1, LW233880.1, LW267200.1, LW267270.1, LW267280.1, LW267290.1, LW267330.1, LW267340.1, LW279320.1, LW279330.1, LW279340.1, LW279370.1, LW279390.1, LW279400.1, LW279410.1, LW279420.1, LW279430.1	Cms066570.1, Cms066590.1, Cms066600.1, Cms066610.1, Cms066620.1, Cms066630.1, Cms066650.1, Cms066670.1, Cms066680.1, Cms066700.1, Cms066720.1, Cms066730.1, Cms066760.1, Cms066770.1, Cms066780.1, Cms066790.1, Cms066810.1, Cms066830.1, Cms066860.1, Cms066870.1, Cms066920.1, Cms081150.1, Cms081170.1, Cms081190.1, Cms120820.1, Cms120830.1, Cms153180.1, Cms153190.1, Cms153220.1, Cms153250.1, Cms153270…	Cm005620.1, Cm005650.1, Cm005660.1, Cm005700.1, Cm005710.1, Cm066640.1, Cm066650.1, Cm066660.1, Cm066680.1, Cm066690.1, Cm066700.1, Cm066720.1, Cm066730.1, Cm066740.1, Cm096780.1, Cm097140.1, Cm097160.1, Cm125420.1, Cm125450.1, Cm276800.1, Cm276810.1, Cm276820.1, Cm311710.1		SYT079380.1, SYT079400.1, SYT081300.1, SYT103380.1	Cic152270.1, Cic152290.1, Cic152330.1, Cic152350.1, Cic152360.1, Cic191460.1, Cic191470.1, Cic191480.1, Cic191500.1, Cic191510.1, Cic191520.1, Cic191530.1, Cic191540.1, Cic191550.1, Cic191580.1, Cic191590.1, Cic191600.1, Cic191610.1, Cic242500.1, Cic242510.1, Cic242530.1, Cic242540.1, Cic242590.1	Pt2g006300.1, Pt9g006510.1, Pt9g006540.1, Pt9g006550.1, Pt9g006570.1, Pt9g006970.1, Pt9g007200.1, Pt9g007210.1, Pt9g007230.1, Pt9g007250.1, Pt9g007270.1, Pt9g007290.1, Pt9g007300.1, Pt9g007310.1, Pt9g007320.1, Pt9g007330.1, Pt9g009800.1, Pt9g009860.1, Pt9g009870.1, Pt9g009890.1, Pt9g009900.1, Pt9g011410.1	H1Y09579.1, H1Y38596.1, H1Y38598.1, H1Y38600.1, H1Y38601.1, H1Y38602.1, H1Y38604.1, H1Y38609.1, H1Y38613.1, H1Y38615.1, H1Y38617.1, H1Y38621.1, H1Y38627.1, H1Y38631.1, H1Y38633.1, H1Y38636.1, H1Y38638.1, H1Y38644.1, H1Y38650.1, H1Y38652.1, H1Y38655.1, H1Y39204.1, H1Y39216.1, H1Y39217.1, H1Y39222.1, H1Y39231.1, H1Y39243.1, H1Y39252.1, H1Y39253.1, H1Y39259.1, H1Y39262.1, H1Y39267.1	H2Y09123.1, H2Y38513.1, H2Y38517.1, H2Y38522.1, H2Y38523.1, H2Y38527.1, H2Y38530.1, H2Y38534.1, H2Y38536.1, H2Y38542.1, H2Y38547.1, H2Y38551.1, H2Y38554.1, H2Y39099.1, H2Y39115.1, H2Y39117.1, H2Y39121.1, H2Y39136.1, H2Y39137.1, H2Y39141.1, H2Y39146.1, H2Y39156.1, H2Y39163.1, H2Y39167.1, H2Y39173.1, H2Y39175.1, H2Y39187.1, H2Y39192.1, H2Y39200.1, H2Y39203.1
OG0012623		OG0000011	Aeg000670.1, Aeg006550.1, Aeg012060.1, Aeg014230.1, Aeg029710.1, Aeg029730.1, Aeg029740.1, Aeg077740.1, Aeg161700.1, Aeg170920.1, Aeg241010.1, Aeg241030.1, Aeg241040.1, Aeg242020.1, Aeg242030.1, Aeg242080.1	Egl024240.1, Egl024250.1, Egl024270.1, Egl039770.1, Egl039780.1, Egl039800.1, Egl157430.1, Egl166110.1, Egl166130.1, Egl170250.1, Egl170270.1, Egl170280.1, Egl170290.1, Egl170300.1, Egl170320.1, Egl170330.1, Egl170350.1, Egl170360.1, Egl170370.1, Egl170380.1, Egl179190.1, Egl179240.1, Egl179300.1, Egl179310.1, Egl179320.1, Egl193710.1, Egl266340.1, Egl266360.1, Egl266400.1, Egl292090.1, Egl302350…	Citropsis036920.1, Citropsis038120.1, Citropsis038140.1, Citropsis058260.1, Citropsis058310.1, Citropsis113770.1, Citropsis151890.1, Citropsis163140.1, Citropsis163180.1, Citropsis253250.1	CP2g003504.t1, CP2g003506.t1, CP2g003508.t1, CP2g003509.t1, CP2g003510.t1, CP2g003511.t1, CP2g003656.t1, CP2g003658.t1, CP2g003660.t1, CP2g003662.t1, CP2g003667.t1, CP2g003668.t1, CP2g003669.t1, CP2g003670.t1, CP3g003412.t1, CP5g001262.t1, CP5g001264.t1, CP5g002898.t1, CP6g000157.t1, CP6g002093.t1, CP6g002098.t1, CP6g002102.t1, CP7g002511.t1, CP7g002512.t1, CP7g002515.t1, CP7g002520.t1, CP7g00252…	Ciclev10003874m.1, Ciclev10008474m.1, Ciclev10011171m.1, Ciclev10013308m.1, Ciclev10013515m.1, Ciclev10013898m.1, Ciclev10014082m.1, Ciclev10014216m.1, Ciclev10014228m.1, Ciclev10014368m.1, Ciclev10014458m.1, Ciclev10014554m.1, Ciclev10014659m.1, Ciclev10015295m.1, Ciclev10017805m.1, Ciclev10017807m.1, Ciclev10018110m.1, Ciclev10018319m.1, Ciclev10018554m.1, Ciclev10018560m.1, Ciclev10023739m.1, …	Fh2g03500.1, Fh2g03510.1, Fh2g03540.1, Fh2g03550.1, Fh2g04920.1, Fh2g04930.1, Fh2g04950.1, Fh2g04980.1, Fh3g08570.1, Fh5g25420.1, Fh5g37790.1, Fh6g08260.1, Fh6g08300.1, Fh6g08310.1, Fh6g26440.1, Fh7g07270.1, Fh7g07310.1, Fh7g07340.1, Fh7g07360.1, Fh7g07390.1, Fh8g09640.1	Chh042810.1, Chh053980.1, Chh056800.1, Chh056820.1, Chh083810.1, Chh094990.1, Chh105510.1, Chh108830.1, Chh136560.1, Chh225620.1, Chh230530.1, Chh230550.1, Chh230570.1, Chh230590.1, Chh230600.1, Chh230610.1	Abu2g_026650.1, Abu2g_028520.1, Abu5g_012080.1, Abu5g_012090.1, Abu5g_012160.1, Abu5g_022980.1, Abu5g_023090.1, Abu6g_017700.1, Abu6g_017750.1, Abu6g_017960.1, Abu7g_007140.1, Abu7g_007200.1, Abu7g_007210.1, Abu7g_007250.1, Abu8g_021300.1	HP002950.1, HP013280.1, HP013300.1, HP040710.1, HP040730.1, HP040740.1, HP040760.1, HP042190.1, HP042200.1, HP042210.1, HP042220.1, HP042230.1, HP042240.1, HP042290.1, HP121820.1, HP121890.1, HP153270.1, HP153310.1, HP154550.1, HP154560.1, HP154570.1, HP154580.1, HP156430.1, HP156590.1, HP173250.1, HP177770.1, HP177810.1, HP189270.1, HP193390.1, HP264330.1, HP267340.1	Cg2g003070.1, Cg2g003100.1, Cg2g003110.1, Cg2g004340.1, Cg2g004350.1, Cg2g004360.1, Cg2g034470.1, Cg2g034510.1, Cg2g034560.1, Cg2g034590.1, Cg2g034610.1, Cg2g034620.1, Cg2g034640.1, Cg2g034670.1, Cg3g004160.1, Cg5g020240.1, Cg5g033430.1, Cg5g033450.1, Cg6g002490.1, Cg6g002510.1, Cg6g002540.1, Cg6g002550.1, Cg6g024280.1, Cg9g015140.1, CgUng005270.1	Cmt089140.1	JLX003700.1, JLX140820.1, JLX152700.1, JLX159830.1, JLX162940.1, JLX166040.1, JLX168570.1, JLX203300.1, JLX203900.1, JLX204750.1, JLX206260.1	LW107450.1, LW119390.1, LW119410.1, LW267840.1	Cms015650.1, Cms040640.1, Cms111230.1, Cms133290.1, Cms133310.1, Cms143580.1, Cms143610.1, Cms143630.1, Cms201850.1, Cms203050.1, Cms203060.1, Cms203070.1, Cms203090.1, Cms203110.1, Cms216270.1, Cms216310.1, Cms216350.1, Cms216380.1, Cms216410.1, Cms219780.1, Cms219840.1, Cms219850.1, Cms219920.1, Cms219990.1, Cms282460.1	Cm182670.1	Cs_ont_2g031420.1, Cs_ont_5g012560.1, Cs_ont_5g012580.1	SYT022120.1, SYT022140.1, SYT067570.1, SYT071100.1, SYT130880.1, SYT166540.1, SYT222060.1, SYT222070.1	Cic018830.1, Cic020090.1	Pt2g002250.1, Pt2g003260.1, Pt2g003270.1, Pt2g003280.1, Pt2g003290.1, Pt2g003310.1, Pt2g003330.1, Pt3g019800.1, Pt3g030210.1, Pt3g030230.1, Pt4g013590.1, Pt4g018340.1, Pt5g021390.1, Pt6g002580.1, Pt6g016910.1, PtUn013980.1, PtUn018040.1, PtUn021530.1, PtUn021570.1, PtUn026220.1, PtUn026870.1, PtUn026890.1, PtUn036790.1	H1Y10058.1, H1Y10063.1, H1Y10066.1, H1Y10067.1, H1Y10218.1, H1Y10222.1, H1Y10225.1, H1Y10227.1, H1Y10233.1, H1Y10237.1, H1Y10243.1, H1Y16466.1, H1Y21092.1, H1Y21096.1, H1Y30914.1, H1Y30939.1, H1Y30958.1, H1Y30972.1	H2Y09609.1, H2Y09827.1, H2Y09829.1, H2Y09835.1, H2Y09837.1, H2Y09842.1, H2Y09849.1, H2Y14031.1, H2Y20782.1, H2Y20786.1, H2Y28586.1, H2Y28595.1, H2Y28598.1, H2Y30615.1, H2Y30629.1
OG0012625		OG0000012		Egl023630.1, Egl068010.1, Egl068020.1, Egl114890.1, Egl114910.1, Egl114950.1, Egl114960.1, Egl114970.1, Egl177170.1, Egl252060.1, Egl252120.1, Egl252130.1, Egl252180.1, Egl252200.1, Egl252220.1, Egl252230.1, Egl252250.1, Egl252260.1, Egl252280.1		CP2g000888.t1, CP2g000889.t1, CP2g000894.t1, CP2g000897.t1, CP2g000898.t1, CP2g000899.t1, CP2g000900.t1, CP2g000901.t1, CP2g000902.t1, CP2g000907.t1, CP2g000908.t1, CP2g000916.t1, CP2g000921.t1, CP2g000925.t1, CP2g000926.t1, CP3g003520.t1, CP3g003529.t1, CP3g003718.t1, CP3g003720.t1, CP3g003723.t1, CP3g003935.t1, CP3g003936.t1	Ciclev10000810m.1, Ciclev10000811m.1, Ciclev10000813m.1, Ciclev10000814m.1, Ciclev10000817m.1, Ciclev10003156m.1, Ciclev10003189m.1, Ciclev10003556m.1, Ciclev10014726m.1, Ciclev10014802m.1, Ciclev10014803m.1, Ciclev10014810m.1, Ciclev10014815m.1, Ciclev10014857m.1, Ciclev10017782m.1, Ciclev10017832m.1, Ciclev10017845m.1, Ciclev10017860m.1, Ciclev10018146m.1, Ciclev10018353m.1, Ciclev10018357m.1	Fh2g28740.1, Fh2g28750.1, Fh2g28780.1, Fh2g28810.1, Fh2g28820.1, Fh2g28840.1, Fh2g28850.1, Fh2g28880.1, Fh2g28890.1, Fh2g28940.1, Fh2g28950.1, Fh2g28970.1, Fh2g28980.1, Fh2g28990.1, Fh2g29000.1, Fh2g29030.1, Fh3g03520.1, Fh3g05970.1, Fh3g05980.1, Fh3g05990.1, Fh3g06010.1, Fh3g06030.1, Fh3g06080.1, Fh3g07590.1, Fh7g09980.1, FhUn01600.1			HP082630.1, HP082690.1, HP082700.1, HP082710.1, HP082730.1, HP082740.1, HP082750.1, HP082780.1, HP082790.1, HP082800.1, HP151450.1, HP151490.1	Cg2g014030.1, Cg2g038730.1, Cg2g038740.1, Cg2g038770.1, Cg2g038780.1, Cg2g038810.1, Cg2g038820.1, Cg2g038850.1, Cg2g038860.1, Cg2g038880.1, Cg2g038890.1, Cg2g038900.1, Cg2g038910.1, Cg2g038920.1, Cg2g038930.1, Cg2g038970.1, Cg3g001130.1, Cg3g001150.1, Cg3g001170.1, Cg3g003700.1, Cg4g014720.1, Cg8g009640.1, Cg8g009700.1, CgUng009590.1, CgUng010550.1, CgUng012720.1, CgUng019650.1	Cmt009650.1, Cmt103290.1, Cmt104080.1, Cmt106690.1, Cmt106750.1, Cmt106770.1, Cmt107880.1, Cmt167160.1, Cmt167200.1, Cmt167220.1, Cmt167230.1, Cmt167240.1, Cmt167250.1, Cmt167270.1, Cmt167320.1, Cmt167350.1, Cmt167360.1, Cmt167410.1, Cmt167420.1	JLX010690.1, JLX012180.1, JLX012370.1, JLX013510.1, JLX013750.1, JLX014700.1, JLX015170.1, JLX015240.1, JLX128450.1, JLX231340.1, JLX231700.1, JLX231750.1, JLX231780.1		Cms022500.1, Cms072520.1, Cms128820.1, Cms162750.1, Cms162770.1, Cms204390.1, Cms224650.1, Cms224660.1, Cms249530.1, Cms257720.1, Cms257730.1, Cms257750.1, Cms257770.1, Cms257820.1, Cms257830.1, Cms257840.1, Cms257850.1, Cms257860.1, Cms257870.1	Cm098190.1, Cm098200.1, Cm098220.1, Cm114580.1, Cm193990.1, Cm194000.1, Cm194020.1, Cm194040.1, Cm194050.1, Cm227720.1, Cm227730.1, Cm251820.1, Cm255290.1, Cm255300.1, Cm255330.1, Cm255350.1, Cm255360.1, Cm288970.1, Cm301980.1, Cm313930.1	Cs_ont_2g008310.1, Cs_ont_2g008370.1, Cs_ont_2g008400.1, Cs_ont_2g008410.1, Cs_ont_2g008430.1, Cs_ont_2g008440.1, Cs_ont_2g008450.1, Cs_ont_2g008470.1, Cs_ont_2g008550.1, Cs_ont_2g008560.1, Cs_ont_3g019550.1, Cs_ont_3g027960.1, Cs_ont_3g028000.1, Cs_ont_3g029470.1, Cs_ont_3g029490.1, Cs_ont_3g029510.1, Cs_ont_3g029530.1, Cs_ont_3g029550.1, Cs_ont_3g029560.1, Cs_ont_3g030640.1	SYT016170.1, SYT016180.1, SYT016190.1, SYT016210.1, SYT016220.1, SYT040980.1, SYT045130.1, SYT071700.1, SYT071740.1, SYT141850.1, SYT141900.1, SYT141910.1, SYT141930.1, SYT235370.1, SYT235380.1, SYT235400.1, SYT235420.1, SYT235430.1, SYT235470.1, SYT235480.1, SYT235520.1	Cic006230.1, Cic006300.1, Cic006310.1, Cic006350.1, Cic006380.1, Cic006390.1, Cic065570.1, Cic065590.1, Cic065620.1, Cic066810.1, Cic112960.1, Cic170730.1, Cic232690.1, Cic232740.1, Cic232800.1, Cic232810.1, Cic232860.1, Cic232870.1, Cic232890.1, Cic232930.1, Cic232940.1, Cic246130.1	Pt2g023800.1, Pt2g023840.1, Pt2g023850.1, Pt2g023860.1, Pt2g023870.1, Pt2g023880.1, Pt2g023890.1, Pt2g023900.1, Pt2g023920.1, Pt2g023930.1, Pt5g020840.1, Pt5g020860.1, Pt5g021570.1, Pt5g021580.1, Pt9g016640.1, PtUn008860.1, PtUn015270.1, PtUn018740.1, PtUn031440.1, PtUn031460.1, PtUn031470.1	H1Y01433.1, H1Y01439.1, H1Y06825.1, H1Y06833.1, H1Y06835.1, H1Y06837.1, H1Y06839.1, H1Y06842.1, H1Y06844.1, H1Y06846.1, H1Y06851.1, H1Y06852.1, H1Y06856.1, H1Y06862.1, H1Y06868.1, H1Y06869.1, H1Y14655.1, H1Y14664.1, H1Y14952.1, H1Y14954.1, H1Y14956.1, H1Y14958.1, H1Y14959.1, H1Y15221.1	H2Y06440.1, H2Y06446.1, H2Y06449.1, H2Y06451.1, H2Y06454.1, H2Y06456.1, H2Y06458.1, H2Y06462.1, H2Y06464.1, H2Y06468.1, H2Y06469.1, H2Y06475.1, H2Y06481.1, H2Y06482.1, H2Y14182.1, H2Y14188.1, H2Y14194.1, H2Y14481.1, H2Y14486.1, H2Y14488.1, H2Y14490.1, H2Y14492.1, H2Y14493.1, H2Y14494.1, H2Y14681.1, H2Y31003.1
OG0012627		OG0000013	Aeg274930.1, Aeg274940.1, Aeg275340.1, Aeg275380.1	Egl007310.1	Citropsis218810.1	CP1g001487.t1, CP1g001491.t1, CP1g001493.t1, CP1g001495.t1, CP1g001503.t1, CP1g001506.t1, CP1g001511.t1, CP1g001604.t1, CP1g001605.t1, CP1g001610.t1, CP1g001611.t1, CP1g001621.t1, CP1g001629.t1, CP1g001637.t1, CP1g001645.t1, CP1g001658.t1, CP1g001687.t1, CP1g001688.t1, CP1g001690.t1, CP1g001701.t1, CP1g001703.t1, CP1g001709.t1, CP1g001723.t1, CP1g001727.t1, CP1g001736.t1, CP1g001895.t1, CP1g00189…	Ciclev10013965m.1, Ciclev10013966m.1, Ciclev10023381m.1, Ciclev10024831m.1, Ciclev10024832m.1, Ciclev10024833m.1, Ciclev10024834m.1, Ciclev10024835m.1, Ciclev10024836m.1, Ciclev10024837m.1, Ciclev10024838m.1, Ciclev10024842m.1, Ciclev10024847m.1, Ciclev10024848m.1, Ciclev10024850m.1, Ciclev10024856m.1, Ciclev10024859m.1, Ciclev10024865m.1, Ciclev10024868m.1, Ciclev10024873m.1, Ciclev10024882m.1, …	Fh1g13880.1, Fh1g14290.1, Fh1g14310.1, Fh1g14320.1, Fh1g14330.1, Fh1g14360.1, Fh1g14370.1, Fh1g14380.1, Fh1g14390.1, Fh1g14400.1, Fh1g14410.1, Fh1g14420.1, Fh1g15670.1, Fh1g15680.1, Fh1g15690.1, Fh1g15730.1, Fh1g15860.1, Fh1g15880.1, Fh1g15990.1, Fh1g16020.1, Fh1g16110.1, Fh1g16140.1, Fh1g16170.1, Fh1g16200.1, Fh1g16230.1, Fh1g16260.1, Fh1g16270.1, Fh1g16290.1, Fh1g16310.1, Fh1g16960.1, Fh1g17000…	Chh095490.1, Chh095510.1, Chh095540.1, Chh095560.1, Chh096070.1	Abu1g_013680.1, Abu1g_013710.1, Abu1g_013730.1, Abu1g_013770.1, Abuscaffold_393_000010.1, Abuscaffold_393_000030.1	HP133860.1, HP136030.1, HP136040.1, HP136120.1, HP136140.1, HP136200.1, HP193880.1, HP193890.1, HP203890.1	Cg1g015760.1, Cg1g015800.1, Cg1g015850.1, Cg1g016340.1, Cg1g016350.1, Cg1g016360.1, Cg1g016370.1, Cg1g016380.1, Cg1g016400.1, Cg1g016410.1, Cg1g016430.1, Cg1g016440.1, Cg1g016460.1, Cg1g016470.1, Cg1g016480.1, Cg1g017860.1, Cg1g017880.1, Cg1g018320.1, Cg1g018730.1, Cg1g018880.1, Cg1g018900.1, Cg1g018930.1, Cg1g020420.1, Cg1g020440.1, Cg1g020500.1, Cg4g015720.1, Cg7g012890.1, Cg8g005630.1, CgUng02…		JLX029510.1, JLX029550.1, JLX029570.1, JLX029670.1, JLX029810.1, JLX030000.1, JLX208040.1, JLX208060.1, JLX208190.1, JLX208230.1, JLX208370.1, JLX208470.1, JLX208520.1, JLX208640.1, JLX208830.1, JLX208840.1, JLX208890.1, JLX208970.1, JLX209310.1, JLX209330.1, JLX209540.1, JLX209790.1, JLX209940.1	LW146700.1, LW167870.1, LW182450.1, LW182460.1, LW220290.1	Cms091330.1, Cms091340.1	Cm233940.1	Cs_ont_1g015320.1, Cs_ont_1g015360.1, Cs_ont_1g015380.1, Cs_ont_1g015390.1	SYT013860.1, SYT015460.1, SYT015480.1, SYT015490.1, SYT146140.1, SYT146150.1	Cic005890.1, Cic005910.1, Cic172890.1	Pt3g020310.1, Pt4g010520.1, Pt4g010540.1, Pt4g010560.1, Pt4g011140.1, Pt4g011160.1, Pt4g011180.1, Pt7g006800.1, Pt7g006830.1, Pt7g006840.1, Pt7g006850.1, Pt7g006900.1, Pt7g006910.1, Pt7g006920.1, Pt7g007150.1, Pt7g007170.1, Pt7g007740.1, Pt7g007790.1, Pt7g007810.1, Pt7g007840.1, Pt7g007850.1, Pt7g007860.1, Pt7g008550.1, Pt7g008560.1, Pt7g008570.1, Pt7g008580.1, Pt7g008590.1, Pt7g008610.1, Pt7g008…	H1Y03770.1, H1Y03772.1, H1Y03773.1, H1Y03784.1, H1Y03796.1, H1Y03896.1, H1Y03898.1, H1Y03899.1, H1Y03907.1, H1Y03908.1, H1Y03914.1, H1Y03933.1, H1Y04078.1, H1Y04148.1, H1Y32543.1, H1Y37008.1	H2Y03454.1, H2Y03456.1, H2Y03459.1, H2Y03666.1, H2Y03676.1, H2Y03731.1, H2Y03738.1, H2Y03741.1
OG0012628		OG0000014				CP8g001578.t1		Fh1g23120.1, Fh7g12140.1			HP000110.1, HP000130.1, HP000200.1, HP000230.1, HP000320.1, HP000420.1, HP000650.1, HP001060.1, HP001480.1, HP001520.1, HP005480.1, HP014050.1, HP014060.1, HP014070.1, HP014090.1, HP014120.1, HP014130.1, HP014190.1, HP014290.1, HP014740.1, HP015150.1, HP015240.1, HP016830.1, HP016890.1, HP018900.1, HP018920.1, HP035750.1, HP036020.1, HP036120.1, HP036140.1, HP036170.1, HP036190.1, HP036200.1, HP0…					Cms127930.1					PtUn011240.1, PtUn020730.1
OG0012633		OG0000015	Aeg048960.1, Aeg170390.1, Aeg170560.1, Aeg171060.1, Aeg171280.1	Egl034860.1, Egl034890.1, Egl034900.1, Egl034960.1, Egl035100.1, Egl079380.1, Egl098180.1, Egl100800.1, Egl258760.1, Egl302100.1, Egl302820.1, Egl302940.1, Egl303030.1, Egl303040.1	Citropsis023690.1, Citropsis024710.1, Citropsis141370.1, Citropsis150370.1, Citropsis151230.1, Citropsis152330.1, Citropsis152350.1, Citropsis155170.1, Citropsis155180.1, Citropsis155220.1, Citropsis155230.1, Citropsis165350.1	CP2g003525.t1, CP5g002039.t1, CP5g002526.t1, CP5g002534.t1, CP5g002539.t1, CP5g002541.t1, CP5g002549.t1, CP5g002552.t1, CP5g002553.t1, CP5g002555.t1, CP5g002565.t1, CP5g002568.t1, CP5g002571.t1, CP5g002572.t1, CP5g002575.t1, CP5g002578.t1, CP5g002586.t1, CP5g002597.t1, CP5g002601.t1, CP5g002604.t1, CP5g002609.t1, CP5g002610.t1, CP5g002616.t1, CP5g002621.t1, CP5g002628.t1, CP5g002633.t1, CP5g00264…	Ciclev10004174m.1, Ciclev10004246m.1, Ciclev10014074m.1, Ciclev10018418m.1, Ciclev10018419m.1, Ciclev10018552m.1, Ciclev10018564m.1, Ciclev10018578m.1, Ciclev10018595m.1, Ciclev10018612m.1, Ciclev10018627m.1, Ciclev10018644m.1, Ciclev10018689m.1, Ciclev10018693m.1, Ciclev10018707m.1, Ciclev10018722m.1, Ciclev10018725m.1, Ciclev10018747m.1, Ciclev10018772m.1, Ciclev10018914m.1, Ciclev10019142m.1, …	Fh2g04730.1, Fh2g04740.1, Fh5g13480.1, Fh5g13500.1, Fh5g24780.1, Fh5g25060.1, Fh5g25170.1, Fh5g25200.1, Fh5g25210.1, Fh5g26090.1, Fh5g26120.1, Fh5g26180.1, Fh5g26210.1, Fh5g26300.1, Fh5g26320.1, Fh5g26340.1, Fh5g26890.1, Fh5g27180.1, Fh5g27210.1, Fh5g27230.1, Fh5g27360.1, Fh5g27380.1, Fh5g27410.1, Fh5g27470.1, Fh5g27500.1, Fh5g27570.1, Fh5g27620.1, Fh5g27650.1, Fh5g27680.1, Fh5g27690.1, Fh9g18210…	Chh049790.1, Chh050720.1, Chh051530.1, Chh164370.1, Chh174530.1, Chh195570.1, Chh195810.1, Chh208300.1, Chh230750.1, Chh231600.1, Chh234170.1, Chh234200.1, Chh234270.1, Chh234320.1, Chh257310.1, Chh261700.1, Chh306560.1, Chh306600.1	Abu5g_021120.1, Abu5g_021830.1, Abu5g_022840.1, Abu9g_014270.1, Abu9g_014430.1	HP003290.1, HP003310.1, HP003320.1, HP004160.1, HP164880.1, HP205600.1, HP252270.1, HP252280.1, HP252290.1, HP281870.1	Cg2g004160.1, Cg2g004170.1, Cg5g021150.1, Cg5g021630.1, CgUng020230.1		JLX164790.1, JLX200850.1, JLX202590.1	LW105570.1, LW106890.1, LW107990.1, LW109230.1, LW205110.1, LW220910.1, LW237790.1	Cms090720.1, Cms135580.1, Cms148490.1, Cms156550.1, Cms164530.1, Cms184550.1	Cm282940.1	Cs_ont_2g031560.1, Cs_ont_2g031570.1, Cs_ont_5g020890.1, Cs_ont_5g023560.1, Cs_ont_5g024290.1, Cs_ont_5g024320.1, Cs_ont_9g017810.1, Cs_ont_9g017940.1	SYT000340.1, SYT000420.1, SYT068660.1, SYT068690.1, SYT073100.1, SYT073110.1, SYT082280.1, SYT225570.1, SYT243090.1	Cic046660.1, Cic046680.1, Cic119240.1, Cic120440.1, Cic167180.1, Cic170170.1, Cic180320.1, Cic180490.1, Cic181200.1		H1Y00981.1, H1Y00985.1, H1Y10082.1, H1Y10083.1, H1Y22528.1, H1Y22531.1, H1Y22548.1, H1Y22597.1, H1Y22603.1, H1Y22637.1, H1Y22639.1, H1Y22724.1, H1Y22725.1, H1Y22733.1, H1Y22737.1, H1Y22754.1, H1Y23076.1, H1Y23077.1, H1Y23085.1, H1Y23129.1, H1Y23372.1, H1Y24871.1, H1Y24878.1, H1Y35615.1, H1Y40521.1, H1Y40547.1, H1Y40558.1, H1Y40567.1, H1Y40570.1	H2Y09634.1, H2Y09635.1, H2Y09636.1, H2Y22369.1, H2Y22371.1, H2Y22383.1, H2Y22387.1, H2Y22399.1, H2Y22417.1, H2Y22485.1, H2Y22557.1, H2Y22559.1, H2Y22566.1, H2Y22577.1, H2Y22585.1, H2Y22599.1, H2Y22603.1, H2Y22609.1, H2Y22835.1, H2Y22839.1, H2Y22850.1, H2Y22851.1, H2Y22899.1, H2Y23118.1, H2Y24614.1, H2Y24617.1, H2Y40538.1, H2Y40568.1, H2Y40580.1, H2Y40589.1
OG0012634		OG0000016	Aeg006830.1, Aeg076460.1, Aeg096090.1, Aeg142140.1, Aeg164860.1, Aeg170340.1, Aeg172600.1, Aeg269330.1	Egl019900.1, Egl036640.1, Egl044240.1, Egl044500.1, Egl078060.1, Egl081020.1, Egl081200.1, Egl102160.1, Egl117670.1, Egl127600.1, Egl179230.1, Egl203790.1, Egl252480.1, Egl257520.1, Egl260570.1, Egl266640.1, Egl271610.1, Egl282550.1, Egl283090.1, Egl285690.1, Egl292440.1	Citropsis003100.1, Citropsis056450.1, Citropsis067910.1, Citropsis067920.1, Citropsis068010.1, Citropsis147400.1, Citropsis153180.1, Citropsis174560.1, Citropsis195410.1, Citropsis210980.1	CP1g000332.t1, CP1g000737.t1, CP1g000750.t1, CP1g001455.t1, CP1g002024.t1, CP1g002044.t1, CP1g002157.t1, CP1g002987.t1, CP2g000089.t1, CP2g000459.t1, CP2g001615.t1, CP2g001623.t1, CP2g001696.t1, CP2g001923.t1, CP2g002182.t1, CP2g003347.t1, CP2g004066.t1, CP3g001826.t1, CP3g002747.t1, CP3g002898.t1, CP3g002977.t1, CP3g003151.t1, CP3g003425.t1, CP3g003462.t1, CP3g003841.t1, CP3g003844.t1, CP3g00424…		Fh1g17330.1, Fh1g17450.1, Fh1g23810.1, Fh1g26000.1, Fh1g30550.1, Fh2g01690.1, Fh2g06900.1, Fh2g09300.1, Fh2g29650.1, Fh3g07160.1, Fh3g09520.1, Fh3g18120.1, Fh3g18440.1, Fh3g24840.1, Fh3g27260.1, Fh3g34050.1, Fh4g13020.1, Fh4g15230.1, Fh4g24420.1, Fh4g24980.1, Fh5g24460.1, Fh5g27260.1, Fh6g01230.1, Fh6g01320.1, Fh6g06970.1, Fh6g12010.1, Fh7g12870.1, Fh7g18060.1, Fh7g18220.1, Fh7g19040.1, Fh7g19980…	Chh041070.1, Chh041880.1, Chh049310.1, Chh077040.1, Chh093110.1, Chh122780.1, Chh174070.1, Chh255370.1, Chh282340.1, Chh288830.1	Abu1g_017210.1, Abu1g_023930.1, Abu1g_024450.1, Abu2g_019770.1, Abu3g_002530.1, Abu3g_003980.1, Abu3g_004460.1, Abu3g_008260.1, Abu3g_010790.1, Abu4g_025300.1, Abu5g_018500.1, Abu8g_006930.1, Abu9g_011870.1	HP004320.1, HP016390.1, HP036960.1, HP036970.1, HP074230.1, HP124500.1, HP131190.1, HP145380.1, HP192680.1, HP202230.1, HP276790.1, HP282290.1				LW022690.1, LW039050.1, LW220110.1	Cms001700.1, Cms069650.1, Cms071910.1, Cms088860.1, Cms090900.1, Cms275120.1		Cs_ont_1g002410.1, Cs_ont_1g015840.1, Cs_ont_3g032500.1, Cs_ont_4g012850.1, Cs_ont_5g033350.1, Cs_ont_7g005770.1		Cic000310.1, Cic051520.1, Cic178560.1		H1Y02347.1, H1Y02650.1, H1Y03042.1, H1Y03374.1, H1Y03978.1, H1Y04207.1, H1Y04237.1, H1Y08895.1, H1Y09828.1, H1Y09884.1, H1Y12513.1, H1Y12637.1, H1Y12701.1, H1Y13683.1, H1Y14567.1, H1Y15060.1, H1Y15295.1, H1Y15523.1, H1Y17585.1, H1Y17873.1, H1Y21681.1, H1Y22061.1, H1Y22550.1, H1Y22699.1, H1Y22761.1, H1Y23279.1, H1Y23374.1, H1Y24225.1, H1Y24290.1, H1Y24455.1, H1Y24982.1, H1Y25071.1, H1Y25700.1, H1Y…	H2Y03479.1, H2Y03815.1, H2Y03888.1, H2Y07049.1, H2Y09144.1, H2Y09721.1, H2Y12038.1, H2Y12753.1, H2Y12757.1, H2Y12782.1, H2Y13138.1, H2Y13236.1, H2Y14071.1, H2Y16870.1, H2Y17557.1, H2Y17740.1, H2Y17755.1, H2Y17785.1, H2Y17978.1, H2Y21389.1, H2Y21723.1, H2Y22512.1, H2Y22622.1, H2Y22705.1, H2Y22753.1, H2Y23472.1, H2Y23531.1, H2Y24555.1, H2Y24664.1, H2Y25697.1, H2Y27984.1, H2Y28129.1, H2Y28583.1, H2Y…
OG0012639		OG0000017	Aeg004970.1, Aeg005000.1, Aeg005280.1			CP1g000140.t1, CP1g000141.t1, CP1g000143.t1, CP3g003803.t1, CP3g003804.t1, CP3g003806.t1, CP3g003807.t1, CP3g003808.t1, CP3g003811.t1, CP3g003816.t1, CP3g003818.t1, CP3g003820.t1, CP3g003913.t1, CP3g003919.t1, CP3g003922.t1, CP3g003923.t1, CP3g003927.t1, CP3g003929.t1, CP3g003931.t1, CP3g003932.t1, CP3g003934.t1, CP3g003937.t1, CP3g003939.t1, CP3g003940.t1, CP3g003942.t1, CP3g003943.t1, CP3g00394…		Fh1g30640.1, Fh3g03490.1, Fh3g03530.1, Fh3g03610.1, Fh3g03670.1, Fh3g03690.1, Fh3g03720.1, Fh3g03750.1, Fh3g03770.1, Fh3g03780.1, Fh3g03870.1, Fh3g05040.1, Fh3g05050.1, Fh3g05090.1, Fh3g05140.1, Fh3g05150.1, Fh3g05180.1, Fh3g05190.1, FhUn01430.1, FhUn01440.1, FhUn01490.1, FhUn01500.1, FhUn01510.1, FhUn01530.1, FhUn01550.1, FhUn01570.1, FhUn01580.1, FhUn01610.1, FhUn01620.1, FhUn01630.1, FhUn01640…	Chh041420.1, Chh041460.1	Abu3g_002400.1		Cg1g028890.1, Cg2g013920.1, Cg2g013930.1, Cg2g013950.1, Cg2g013960.1, Cg2g013980.1, Cg2g014000.1, Cg2g014040.1, Cg2g014100.1, Cg2g014110.1, Cg2g014120.1, Cg2g014160.1, Cg2g014180.1, Cg2g014220.1, Cg2g014230.1, Cg3g000010.1, Cg3g000030.1, Cg3g000470.1, Cg3g000480.1, Cg3g000490.1, Cg3g000530.1, Cg3g000550.1, Cg3g000560.1, Cg3g000680.1, Cg3g000690.1, Cg4g006300.1, Cg4g006310.1, Cg6g016900.1, CgUng01…		JLX052810.1, JLX052850.1, JLX052860.1, JLX052880.1, JLX052900.1, JLX052920.1, JLX052950.1, JLX053000.1, JLX053030.1, JLX230840.1, JLX230950.1, JLX231030.1, JLX231480.1	LW269840.1, LW270220.1, LW270230.1, LW276520.1, LW276600.1, LW276610.1, LW276640.1, LW276660.1, LW276670.1	Cms204310.1		Cs_ont_1g000880.1, Cs_ont_3g029960.1, Cs_ont_3g030010.1, Cs_ont_3g030050.1, Cs_ont_3g030540.1, Cs_ont_3g030550.1, Cs_ont_3g030580.1, Cs_ont_3g030590.1, Cs_ont_3g030600.1, Cs_ont_3g030620.1, Cs_ont_3g030630.1, Cs_ont_3g030660.1, Cs_ont_3g030670.1, Cs_ont_3g030690.1, Cs_ont_3g030700.1, Cs_ont_3g030710.1, Cs_ont_3g030730.1, Cs_ont_3g030750.1	SYT046840.1, SYT068800.1, SYT068840.1, SYT068850.1, SYT068870.1, SYT068880.1, SYT068900.1, SYT068920.1, SYT069140.1, SYT070040.1, SYT083440.1, SYT133900.1	Cic055860.1, Cic065120.1, Cic065150.1, Cic170320.1, Cic170340.1, Cic170600.1, Cic170650.1, Cic170660.1, Cic170690.1, Cic170700.1, Cic170720.1, Cic170760.1, Cic170770.1, Cic170780.1, Cic170800.1, Cic170810.1, Cic170830.1, Cic170930.1, Cic170950.1, Cic170960.1, Cic174540.1, Cic245890.1, Cic245930.1, Cic245940.1, Cic245970.1, Cic245980.1, Cic246090.1, Cic246100.1, Cic246110.1, Cic246140.1, Cic246150…	Pt5g021800.1, Pt5g021830.1, Pt5g021860.1, Pt5g021870.1, Pt5g022100.1, Pt5g022120.1, Pt5g022170.1, Pt5g022180.1, Pt5g022190.1, Pt5g022200.1, Pt5g022210.1, Pt5g022240.1, Pt5g022250.1, Pt7g000300.1, PtUn015260.1, PtUn015280.1, PtUn015290.1, PtUn015310.1, PtUn015320.1, PtUn015330.1, PtUn015340.1, PtUn015350.1, PtUn015360.1, PtUn015390.1, PtUn019580.1, PtUn022460.1, PtUn022470.1, PtUn022500.1, PtUn023…	H1Y02109.1, H1Y02113.1, H1Y15031.1, H1Y15034.1, H1Y15038.1, H1Y15040.1, H1Y15046.1, H1Y15047.1, H1Y15052.1, H1Y15053.1, H1Y15188.1, H1Y15193.1, H1Y15199.1, H1Y15201.1, H1Y15204.1, H1Y15205.1, H1Y15209.1, H1Y15212.1, H1Y15213.1, H1Y15216.1, H1Y15218.1, H1Y15220.1, H1Y15225.1, H1Y15227.1, H1Y15228.1, H1Y15230.1, H1Y15231.1, H1Y15236.1, H1Y15240.1, H1Y15243.1, H1Y15247.1, H1Y15249.1, H1Y15251.1, H1Y…	H2Y01658.1, H2Y01661.1, H2Y14557.1, H2Y14559.1, H2Y14561.1, H2Y14562.1, H2Y14564.1, H2Y14576.1, H2Y14584.1, H2Y14587.1, H2Y14588.1, H2Y14594.1, H2Y14595.1, H2Y14647.1, H2Y14652.1, H2Y14657.1, H2Y14658.1, H2Y14663.1, H2Y14664.1, H2Y14668.1, H2Y14671.1, H2Y14674.1, H2Y14676.1, H2Y14677.1, H2Y14678.1, H2Y14679.1, H2Y14680.1, H2Y14685.1, H2Y14687.1, H2Y14688.1, H2Y14692.1, H2Y14693.1, H2Y14694.1, H2Y…
OG0012640		OG0000018	Aeg093270.1, Aeg121090.1, Aeg121100.1, Aeg121110.1, Aeg168480.1, Aeg168560.1, Aeg168830.1, Aeg168880.1, Aeg211580.1, Aeg211600.1	Egl003420.1, Egl025450.1, Egl035680.1, Egl041300.1, Egl041350.1, Egl041360.1, Egl041380.1, Egl130230.1, Egl130300.1, Egl199630.1, Egl199660.1, Egl218800.1, Egl229710.1, Egl236590.1, Egl236610.1, Egl236730.1, Egl236790.1, Egl237250.1, Egl237260.1, Egl237280.1, Egl237310.1, Egl237350.1, Egl265650.1, Egl265680.1	Citropsis038920.1, Citropsis038930.1, Citropsis058900.1, Citropsis146860.1, Citropsis146910.1, Citropsis146940.1, Citropsis146950.1, Citropsis147440.1, Citropsis147490.1, Citropsis147520.1, Citropsis209970.1, Citropsis261550.1, Citropsis261560.1, Citropsis261580.1, Citropsis261590.1, Citropsis263340.1, Citropsis264610.1, Citropsis264620.1, Citropsis264700.1, Citropsis267070.1, Citropsis267140.1, …	CP2g003804.t1, CP3g001104.t1, CP4g002235.t1, CP4g002236.t1, CP4g002242.t1, CP5g001956.t1, CP5g002130.t1, CP5g002259.t1, CP5g002270.t1, CP5g002271.t1, CP5g002272.t1, CP5g002277.t1, CP5g002278.t1, CP5g002281.t1, CP5g002282.t1, CP5g002285.t1, CP5g002286.t1, CP5g002287.t1, CP5g002295.t1, CP5g002382.t1, CP5g002383.t1, CP5g002386.t1, CP5g002408.t1, CP5g003823.t1, CP6g002012.t1, CP8g001759.t1, CP8g00200…	Ciclev10000287m.1, Ciclev10004108m.1, Ciclev10004321m.1, Ciclev10007053m.1, Ciclev10007491m.1, Ciclev10010205m.1, Ciclev10013679m.1, Ciclev10017515m.1, Ciclev10017577m.1, Ciclev10018637m.1, Ciclev10018678m.1, Ciclev10018798m.1, Ciclev10018816m.1, Ciclev10019217m.1, Ciclev10023370m.1, Ciclev10023474m.1, Ciclev10023511m.1, Ciclev10023662m.1, Ciclev10023899m.1, Ciclev10024208m.1, Ciclev10024240m.1, …	Fh2g02460.1, Fh2g02500.1, Fh3g28800.1, Fh4g09500.1, Fh4g09540.1, Fh4g09560.1, Fh4g09570.1, Fh4g17950.1, Fh5g17490.1, Fh5g17500.1, Fh5g28650.1, Fh5g28660.1, Fh5g28700.1, Fh5g28750.1, Fh5g29180.1, Fh5g29250.1, Fh5g29280.1, Fh5g29300.1, Fh5g29310.1, Fh5g29360.1, Fh8g13430.1, Fh8g18530.1, Fh8g20820.1, Fh8g20870.1, Fh8g20900.1, Fh8g20920.1, Fh8g20930.1, Fh8g20950.1, Fh9g12900.1, Fh9g13610.1, Fh9g19020…		Abu5g_012120.1, Abu8g_005400.1	HP005180.1, HP005190.1, HP005210.1, HP114150.1, HP174830.1, HP174860.1, HP202950.1, HP269180.1, HP269190.1, HP288420.1, HP288450.1, HP288470.1, HP291250.1, HP291280.1	Cg1g012200.1, Cg1g012210.1, Cg2g002160.1, Cg2g016150.1, Cg2g016200.1, Cg2g016650.1, Cg2g016670.1, Cg2g016730.1, Cg2g016790.1, Cg2g021590.1, Cg3g015080.1, Cg4g015830.1, Cg4g016010.1, Cg5g003980.1, Cg5g016880.1, Cg5g016920.1, Cg5g016950.1, Cg5g023940.1, Cg8g009880.1, Cg8g012480.1, Cg8g012530.1, Cg8g012550.1, Cg8g012600.1, Cg8g012620.1, Cg8g012630.1, Cg8g012640.1, Cg8g012710.1, Cg8g012790.1, Cg9g011…	Cmt044940.1, Cmt208930.1	JLX037170.1, JLX039300.1, JLX083410.1, JLX083420.1, JLX128000.1, JLX132280.1, JLX149040.1, JLX149060.1, JLX150740.1, JLX151190.1, JLX151410.1, JLX151970.1, JLX152020.1, JLX164620.1, JLX172980.1, JLX175410.1, JLX181670.1, JLX199610.1, JLX201700.1, JLX207820.1, JLX207830.1	LW102250.1, LW102350.1, LW110930.1, LW110950.1, LW110960.1, LW110970.1, LW197080.1, LW304800.1, LW304820.1, LW315040.1	Cms013160.1, Cms049520.1, Cms156090.1		Cs_ont_2g033440.1	SYT013380.1, SYT041600.1, SYT082640.1, SYT172710.1, SYT200650.1, SYT211870.1, SYT216230.1, SYT216270.1	Cic025500.1, Cic033450.1, Cic246550.1	Pt1g008200.1, Pt1g011710.1, Pt2g004110.1, Pt2g004130.1, Pt3g020890.1, Pt3g021220.1, Pt3g022300.1, Pt3g022310.1, Pt3g022340.1, Pt3g022350.1, Pt3g024520.1, Pt5g009570.1, Pt9g010720.1, Pt9g011490.1, PtUn003290.1, PtUn003300.1, PtUn003310.1, PtUn006820.1, PtUn015030.1, PtUn029590.1	H1Y10349.1, H1Y11872.1, H1Y17016.1, H1Y17023.1, H1Y17973.1, H1Y21862.1, H1Y22060.1, H1Y22226.1, H1Y22233.1, H1Y22241.1, H1Y22247.1, H1Y22254.1, H1Y22257.1, H1Y22263.1, H1Y24276.1, H1Y28712.1, H1Y35035.1, H1Y35046.1, H1Y35053.1, H1Y35390.1, H1Y35755.1, H1Y39573.1, H1Y39722.1	H2Y09946.1, H2Y11586.1, H2Y16463.1, H2Y16468.1, H2Y21593.1, H2Y21998.1, H2Y22005.1, H2Y22006.1, H2Y22009.1, H2Y22013.1, H2Y22016.1, H2Y22187.1, H2Y34599.1, H2Y34605.1, H2Y34608.1, H2Y34612.1, H2Y34619.1, H2Y34622.1, H2Y34998.1, H2Y35814.1, H2Y39513.1, H2Y40697.1
OG0012641		OG0000019	Aeg273640.1, Aeg273800.1, Aeg273810.1, Aeg273820.1, Aeg273860.1, Aeg273880.1, Aeg273890.1	Egl168120.1, Egl185490.1, Egl186120.1, Egl186180.1, Egl186270.1, Egl213290.1	Citropsis149900.1, Citropsis194380.1, Citropsis216350.1, Citropsis216360.1, Citropsis216780.1, Citropsis216830.1, Citropsis216890.1, Citropsis216900.1, Citropsis217040.1, Citropsis217050.1, Citropsis217100.1, Citropsis217150.1, Citropsis217180.1, Citropsis217830.1, Citropsis270610.1	CP1g001436.t1, CP1g001437.t1, CP1g001516.t1, CP1g001518.t1, CP1g001523.t1, CP1g001524.t1, CP1g001537.t1, CP1g001540.t1, CP1g001544.t1, CP1g001546.t1, CP1g001548.t1, CP1g001555.t1, CP1g001563.t1, CP1g001568.t1, CP1g001578.t1, CP1g001586.t1, CP1g001587.t1, CP1g001592.t1, CP1g001593.t1, CP1g001597.t1, CP5g004006.t1	Ciclev10023513m.1, Ciclev10024083m.1, Ciclev10024794m.1, Ciclev10025126m.1, Ciclev10025151m.1, Ciclev10025198m.1, Ciclev10026792m.1, Ciclev10026980m.1, Ciclev10027016m.1, Ciclev10027124m.1, Ciclev10027313m.1, Ciclev10027330m.1, Ciclev10027344m.1, Ciclev10027472m.1, Ciclev10027492m.1, Ciclev10027505m.1, Ciclev10027537m.1	Fh1g16410.1, Fh1g16440.1, Fh1g16480.1, Fh1g16500.1, Fh1g16520.1, Fh1g16560.1, Fh1g16620.1, Fh1g16750.1, Fh1g16770.1, Fh1g16780.1, Fh1g16820.1, Fh1g16880.1, Fh1g16890.1, Fh1g17670.1, Fh5g28040.1, Fh5g39450.1, FhUn10810.1, FhUn10840.1, FhUn10860.1, FhUn10870.1, FhUn10880.1, FhUn10990.1, FhUn11020.1, FhUn11040.1, FhUn11060.1, FhUn11110.1, FhUn11130.1, FhUn11160.1, FhUn11170.1, FhUn11180.1, FhUn11310…	Chh041190.1, Chh041200.1, Chh041260.1, Chh094550.1, Chh211150.1, Chh249280.1, Chh249410.1, Chh249420.1, Chh249430.1, Chh249440.1, Chh249450.1, Chh249500.1, Chh249510.1, Chh277450.1	Abu1g_015430.1, Abu1g_015480.1, Abu1g_015490.1, Abu1g_015640.1, Abu1g_015680.1, Abu1g_015850.1, Abu1g_015880.1, Abu1g_015910.1, Abu1g_015930.1, Abu4g_003250.1, Abu6g_016110.1, Abuscaffold_37_000010.1	HP133440.1, HP148370.1	Cg1g019030.1, Cg1g019040.1, Cg1g020100.1, Cg1g020620.1, Cg1g020640.1, Cg1g020750.1, Cg1g020800.1, Cg1g020810.1, Cg1g020830.1, Cg1g020900.1, Cg7g005520.1, Cg9g023770.1		JLX029870.1, JLX029980.1, JLX054120.1, JLX054370.1, JLX208730.1, JLX209610.1	LW017280.1, LW026350.1, LW026360.1, LW026400.1, LW026430.1, LW026450.1, LW026610.1, LW026620.1, LW026670.1, LW026710.1, LW026740.1, LW026780.1, LW121070.1, LW178540.1, LW179190.1, LW179210.1, LW179260.1, LW179280.1, LW179410.1, LW179450.1, LW179500.1, LW179530.1, LW179570.1, LW179640.1, LW179670.1, LW179710.1, LW179730.1, LW179810.1, LW179820.1	Cms041540.1, Cms093090.1, Cms093200.1, Cms093260.1, Cms093270.1, Cms093390.1, Cms093410.1, Cms093450.1, Cms093870.1, Cms093880.1, Cms166330.1, Cms241270.1, Cms241280.1	Cm156250.1, Cm156260.1, Cm156270.1, Cm187060.1, Cm187180.1, Cm187200.1, Cm187220.1, Cm187230.1, Cm187250.1, Cm226990.1, Cm244180.1, Cm244200.1, Cm261060.1, Cm261070.1, Cm261080.1, Cm261120.1, Cm271480.1, Cm271490.1, Cm271550.1, Cm272330.1, Cm272440.1, Cm282340.1, Cm296820.1, Cm302460.1, Cm302550.1, Cm305240.1, Cm316110.1	Cs_ont_1g012260.1, Cs_ont_1g012740.1, Cs_ont_1g012780.1, Cs_ont_1g012800.1, Cs_ont_1g012820.1, Cs_ont_1g012840.1, Cs_ont_1g012870.1, Cs_ont_1g012900.1, Cs_ont_1g012910.1, Cs_ont_1g013040.1, Cs_ont_1g013090.1, Cs_ont_1g013140.1, Cs_ont_1g013190.1, Cs_ont_1g013210.1, Cs_ont_1g013240.1, Cs_ont_1g013270.1, Cs_ont_1g013280.1, Cs_ont_1g013320.1, Cs_ont_1g013330.1, Cs_ont_9g023440.1	SYT052740.1, SYT140510.1	Cic033480.1, Cic174770.1, Cic174830.1, Cic174840.1, Cic174920.1, Cic175030.1, Cic175040.1, Cic175070.1, Cic175080.1, Cic175160.1, Cic175170.1, Cic175770.1	Pt7g006540.1, Pt7g006990.1, Pt7g007000.1, Pt7g007020.1, Pt7g007970.1, Pt7g007990.1, Pt7g008010.1, Pt7g008020.1, Pt7g008040.1, Pt7g008050.1, Pt7g008080.1, Pt7g008100.1, Pt7g008140.1, Pt7g008150.1, Pt7g008160.1, Pt7g008200.1, Pt9g017150.1, PtUn027800.1, PtUn027830.1	H1Y00416.1, H1Y03729.1, H1Y03807.1, H1Y03810.1, H1Y03811.1, H1Y03826.1, H1Y03832.1, H1Y03835.1, H1Y03838.1, H1Y03839.1, H1Y03844.1, H1Y03848.1, H1Y03856.1, H1Y03860.1, H1Y03869.1, H1Y03877.1, H1Y03878.1, H1Y03885.1, H1Y03886.1, H1Y03887.1, H1Y24493.1, H1Y24498.1, H1Y30534.1	H2Y03304.1, H2Y03381.1, H2Y03383.1, H2Y03387.1, H2Y03389.1, H2Y03390.1, H2Y03404.1, H2Y03406.1, H2Y03412.1, H2Y03416.1, H2Y03418.1, H2Y03422.1, H2Y03429.1, H2Y03430.1, H2Y03431.1, H2Y03435.1, H2Y03438.1, H2Y03441.1, H2Y03443.1, H2Y03445.1, H2Y03446.1, H2Y30293.1
OG0012642		OG0000020	Aeg052290.1, Aeg052310.1, Aeg052320.1, Aeg059700.1, Aeg059710.1, Aeg120820.1, Aeg272900.1, Aeg275240.1, Aeg275250.1	Egl168450.1, Egl168460.1, Egl168480.1, Egl270530.1, Egl270550.1, Egl270570.1, Egl270580.1, Egl270600.1, Egl270620.1, Egl270630.1, Egl272090.1, Egl272100.1, Egl272150.1, Egl272160.1, Egl272200.1, Egl274210.1, Egl274300.1, Egl274310.1, Egl274330.1, Egl274340.1	Citropsis023840.1, Citropsis087160.1, Citropsis087180.1, Citropsis087190.1, Citropsis087210.1, Citropsis122050.1, Citropsis157820.1, Citropsis163420.1, Citropsis218710.1, Citropsis262240.1	CP1g001943.t1, CP1g001948.t1, CP1g001950.t1, CP1g001952.t1, CP1g001953.t1, CP5g003622.t1, CP5g003623.t1, CP5g003628.t1, CP5g003629.t1, CP5g003633.t1, CP5g003634.t1, CP5g003636.t1, CP5g003637.t1, CP5g003641.t1, CP9g002573.t1, CP9g002578.t1, CP9g002586.t1	Ciclev10003989m.1, Ciclev10004431m.1, Ciclev10004476m.1, Ciclev10006431m.1, Ciclev10006761m.1, Ciclev10007060m.1, Ciclev10007075m.1, Ciclev10019288m.1, Ciclev10019295m.1, Ciclev10019768m.1, Ciclev10020606m.1, Ciclev10023277m.1, Ciclev10023424m.1, Ciclev10023494m.1, Ciclev10023909m.1, Ciclev10024076m.1, Ciclev10024305m.1, Ciclev10024995m.1, Ciclev10025012m.1, Ciclev10025014m.1, Ciclev10025047m.1, …	Fh1g13980.1, Fh1g13990.1, Fh1g14000.1, Fh1g14010.1, Fh5g19230.1, Fh5g19250.1, Fh9g23750.1, Fh9g23760.1, Fh9g23770.1, Fh9g23810.1, Fh9g23850.1, FhUn06710.1, FhUn06720.1, FhUn06730.1	Chh095660.1, Chh095670.1, Chh104130.1, Chh149960.1, Chh149970.1, Chh149980.1, Chh149990.1, Chh150020.1, Chh150030.1, Chh187720.1, Chh187750.1, Chh232040.1, Chh232050.1, Chh232070.1, Chh232110.1, Chh232120.1, Chh232130.1, Chh232140.1, Chh236190.1, Chh236310.1, Chh277750.1, Chh277760.1, Chh277780.1, Chh283160.1	Abu1g_013850.1, Abu1g_013860.1, Abu1g_013870.1, Abu1g_013880.1, Abu5g_027760.1, Abu5g_027780.1, Abu5g_027900.1, Abu5g_027930.1, Abu8g_004640.1, Abu9g_018590.1, Abu9g_018600.1, Abu9g_018630.1, Abu9g_018650.1, Abu9g_018660.1, Abu9g_018680.1, Abu9g_018700.1, Abu9g_018710.1, Abu9g_018730.1	HP064670.1, HP064680.1, HP112340.1, HP112350.1, HP135900.1, HP135930.1, HP153250.1, HP268470.1, HP268530.1, HP268570.1	Cg1g001770.1, Cg1g015960.1, Cg1g015970.1, Cg1g021470.1, Cg1g021480.1, Cg2g024270.1, Cg2g024280.1, Cg2g024310.1, Cg3g001440.2.1, Cg4g022800.1, Cg4g022810.1, Cg4g022830.1, Cg4g022860.1, Cg4g022870.1, Cg5g018420.1, Cg5g018430.1, Cg5g018780.1, Cg5g018790.1, Cg8g011610.1, Cg8g011660.1, Cg8g011720.1, Cg8g011870.1, Cg9g024970.1, Cg9g025010.1, Cg9g025020.1, Cg9g025030.1, Cg9g025050.1, CgUng021290.1	Cmt075080.1, Cmt075130.1, Cmt075200.1, Cmt075210.1, Cmt140340.1, Cmt140360.1, Cmt140370.1, Cmt261390.1, Cmt261400.1	JLX053980.1, JLX082840.1, JLX083200.1, JLX208720.1, JLX209670.1	LW182310.1, LW182330.1, LW182340.1, LW182350.1, LW243690.1, LW243700.1, LW243720.1, LW248500.1, LW248510.1, LW248580.1, LW248610.1, LW248630.1, LW248640.1	Cms037650.1, Cms041850.1, Cms041870.1, Cms041880.1, Cms041890.1, Cms041910.1, Cms091460.1, Cms184640.1, Cms184680.1, Cms184690.1, Cms184740.1	Cm061970.1, Cm061980.1, Cm062000.1, Cm186750.1, Cm186760.1, Cm193580.1		SYT009080.1, SYT015380.1, SYT083950.1, SYT083960.1	Cic006140.1, Cic006150.1, Cic033780.1, Cic094680.1, Cic094700.1, Cic094900.1, Cic172990.1	Pt3g015890.1, Pt3g015900.1, Pt3g016230.1, Pt3g016240.1, Pt3g016280.1, Pt3g016300.1, Pt3g016310.1, Pt3g016320.1, Pt9g017380.1, Pt9g017390.1, Pt9g017400.1, Pt9g017450.1, PtUn026010.1, PtUn026020.1, PtUn026030.1, PtUn026040.1, PtUn027920.1, PtUn027950.1, PtUn027960.1, PtUn027970.1, PtUn027980.1, PtUn030400.1	H1Y04117.1, H1Y04123.1, H1Y04126.1, H1Y04129.1, H1Y04134.1, H1Y23927.1, H1Y23934.1, H1Y23935.1, H1Y23942.1, H1Y23943.1, H1Y23949.1, H1Y23956.1, H1Y23958.1, H1Y23959.1, H1Y23969.1, H1Y23970.1, H1Y23976.1, H1Y23983.1, H1Y23991.1, H1Y23992.1, H1Y24000.1, H1Y24001.1, H1Y24005.1, H1Y24006.1, H1Y41476.1, H1Y41481.1, H1Y41482.1, H1Y41484.1, H1Y41493.1	H2Y03717.1, H2Y03718.1, H2Y03720.1, H2Y23709.1, H2Y23711.1, H2Y23716.1, H2Y23723.1, H2Y23724.1, H2Y23731.1, H2Y23740.1, H2Y23741.1, H2Y23748.1, H2Y23749.1, H2Y23756.1, H2Y23757.1, H2Y23763.1, H2Y23764.1, H2Y23768.1, H2Y23775.1, H2Y23776.1, H2Y23780.1, H2Y41469.1, H2Y41472.1, H2Y41473.1
OG0012643		OG0000021	Aeg077140.1, Aeg077150.1, Aeg179620.1	Egl020800.1, Egl020810.1, Egl036850.1, Egl178190.1, Egl178200.1, Egl240750.1, Egl240760.1, Egl240790.1, Egl240870.1, Egl240920.1, Egl306290.1, Egl306560.1	Citropsis116700.1, Citropsis140250.1, Citropsis163410.1, Citropsis165610.1, Citropsis167510.1, Citropsis167520.1, Citropsis168000.1, Citropsis168050.1, Citropsis168080.1, Citropsis168160.1, Citropsis168180.1, Citropsis169110.1, Citropsis169140.1, Citropsis170550.1	CP1g000517.t1, CP1g000523.t1, CP1g000634.t1, CP1g000637.t1, CP1g000642.t1, CP1g000645.t1, CP1g000646.t1, CP1g000731.t1, CP2g003167.t1, CP2g003764.t1, CP3g002751.t1, CP3g002805.t1, CP6g001613.t1, CP7g002351.t1, CP7g002352.t1, CP7g002353.t1, CP7g002356.t1, CP7g002361.t1, CP8g000528.t1, CP8g001127.t1	Ciclev10000036m.1, Ciclev10000345m.1, Ciclev10003289m.1, Ciclev10003396m.1, Ciclev10003538m.1, Ciclev10003965m.1, Ciclev10004039m.1, Ciclev10013652m.1, Ciclev10017693m.1, Ciclev10018315m.1, Ciclev10026982m.1, Ciclev10026983m.1, Ciclev10027166m.1, Ciclev10027381m.1, Ciclev10027846m.1, Ciclev10029995m.1, Ciclev10030614m.1, Ciclev10030615m.1, Ciclev10030668m.1, Ciclev10033749m.1	Fh1g24950.1, Fh1g25830.1, Fh1g25880.1, Fh1g25900.1, Fh1g25960.1, Fh1g25980.1, Fh1g26030.1, Fh1g26080.1, Fh1g26140.1, Fh1g26190.1, Fh1g26230.1, Fh1g27280.1, Fh1g27290.1, Fh1g27330.1, Fh2g02730.1, Fh2g02750.1, Fh2g08090.1, Fh3g13620.1, Fh6g12950.1, Fh7g08700.1, Fh7g08720.1, Fh8g04100.1, Fh8g09150.1, Fh8g19820.1, FhUn07780.1, FhUn07800.1, FhUn07810.1, FhUn08950.1, FhUn08970.1, FhUn09020.1, FhUn09040…	Chh044210.1, Chh044230.1, Chh071810.1, Chh108390.1, Chh146800.1, Chh146870.1, Chh153870.1, Chh153900.1, Chh207280.1, Chh207330.1, Chh207370.1, Chh262780.1, Chh262790.1, Chh262800.1, Chh262860.1, Chh262900.1	Abu1g_021530.1, Abu1g_021540.1, Abu1g_021590.1, Abu1g_021600.1, Abu1g_022110.1, Abu1g_022600.1, Abu7g_008220.1, Abu7g_008240.1, Abu9g_011080.1	HP149970.1, HP160140.1, HP177920.1	Cg1g022640.1, Cg1g022950.1, Cg1g024680.1, Cg1g024710.1, Cg1g024740.1, Cg1g024780.1, Cg1g024840.1, Cg1g024870.1, Cg1g025690.1, Cg1g025700.1, Cg1g025940.1, Cg1g025950.1, Cg1g025960.1, Cg1g025970.1, Cg2g002340.1, Cg2g002360.1, Cg2g007510.1, Cg5g013750.1, Cg6g006640.1, Cg7g009650.1, Cg7g009670.1, Cg7g009720.1, Cg7g009750.1, Cg8g003690.1, Cg8g008900.1, Cg8g008910.1, CgUng022000.1	Cmt188180.1	JLX026300.1, JLX034800.1, JLX040260.1, JLX041220.1, JLX041260.1, JLX046450.1, JLX053760.1, JLX066610.1, JLX068140.1, JLX068220.1, JLX068430.1, JLX068440.1, JLX090650.1, JLX090660.1, JLX139040.1, JLX199750.1, JLX216440.1, JLX216670.1, JLX216720.1, JLX217220.1, JLX228500.1, JLX231980.1, JLX232160.1	LW238640.1, LW265460.1	Cms034210.1, Cms129760.1, Cms129790.1, Cms129830.1, Cms241010.1, Cms241770.1, Cms241820.1, Cms242610.1, Cms242770.1	Cm002020.1, Cm052510.1, Cm082010.1, Cm082050.1, Cm082100.1, Cm082160.1, Cm082220.1, Cm120790.1, Cm120810.1, Cm120850.1, Cm156050.1, Cm174590.1, Cm174600.1, Cm174660.1, Cm174680.1, Cm178430.1, Cm178460.1, Cm185690.1, Cm185740.1, Cm204810.1, Cm204820.1, Cm204830.1, Cm233250.1, Cm233280.1, Cm239270.1, Cm254100.1, Cm254110.1, Cm264660.1	Cs_ont_1g005210.1, Cs_ont_7g008680.1, Cs_ont_7g008730.1, Cs_ont_7g008770.1	SYT218810.1	Cic026820.1, Cic026880.1, Cic026920.1, Cic051460.1, Cic051890.1, Cic052720.1	Pt2g003900.1, Pt2g006670.1, Pt4g015690.1, Pt4g015700.1, Pt4g015710.1, Pt4g015730.1, Pt5g023540.1, Pt5g023550.1, Pt5g024600.1, Pt5g024870.1, Pt5g024900.1, Pt5g024950.1, Pt5g025600.1, Pt5g025610.1, Pt5g026130.1, Pt5g026140.1, Pt5g026170.1, Pt5g026180.1, Pt5g026200.1, Pt5g026230.1, Pt6g013350.1, Pt7g003680.1, Pt7g003790.1, Pt7g003830.1, Pt7g003840.1, Pt8g003540.1, PtUn000230.1, PtUn005580.1, PtUn016…	H1Y02617.1, H1Y02657.1, H1Y02758.1, H1Y02761.1, H1Y02763.1, H1Y02766.1, H1Y02771.1, H1Y02774.1, H1Y02867.1, H1Y09648.1, H1Y10323.1, H1Y31170.1, H1Y31183.1, H1Y31193.1, H1Y36591.1, H1Y37294.1	H2Y02096.1, H2Y02097.1, H2Y02103.1, H2Y02142.1, H2Y02251.1, H2Y02257.1, H2Y02259.1, H2Y02265.1, H2Y02270.1, H2Y02275.1, H2Y02279.1, H2Y09185.1, H2Y09928.1, H2Y30842.1, H2Y30844.1, H2Y30857.1, H2Y30865.1, H2Y36536.1, H2Y37224.1
OG0012644		OG0000022	Aeg170730.1	Egl037390.1, Egl082580.1, Egl195630.1, Egl200020.1, Egl201780.1, Egl241960.1, Egl258370.1, Egl260170.1, Egl268480.1, Egl279210.1, Egl286950.1, Egl290350.1, Egl300070.1, Egl301110.1	Citropsis005500.1, Citropsis019850.1, Citropsis037310.1, Citropsis046490.1, Citropsis093460.1, Citropsis123770.1, Citropsis124740.1, Citropsis124980.1, Citropsis148960.1, Citropsis149190.1, Citropsis150220.1, Citropsis152150.1, Citropsis158070.1, Citropsis159600.1, Citropsis165620.1, Citropsis168030.1, Citropsis168040.1, Citropsis171390.1, Citropsis182560.1, Citropsis187830.1, Citropsis189200.1, …	CP3g001272.t1, CP3g001807.t1, CP3g003901.t1, CP4g000934.t1, CP4g000935.t1, CP5g003605.t1, CP7g001489.t1, CP9g002441.t1		Fh2g04910.1, Fh3g00880.1	Chh128520.1, Chh188170.1, Chh188180.1					JLX167360.1	LW016070.1, LW047640.1, LW056580.1, LW073070.1, LW075710.1, LW098950.1, LW104030.1, LW105200.1, LW111720.1, LW140650.1, LW155590.1, LW170670.1, LW176660.1, LW221550.1, LW234120.1, LW239600.1, LW244670.1, LW252840.1, LW252850.1, LW258530.1, LW270120.1, LW277940.1, LW288790.1, LW314610.1	Cms166070.1, Cms266050.1	Cm140530.1, Cm166270.1, Cm215290.1, Cm280380.1, Cm301560.1, Cm307740.1, Cm309180.1, Cm324430.1	Cs_ont_2g022280.1, Cs_ont_5g026500.1, Cs_ont_5g026510.1, Cs_ont_5g033340.1, Cs_ont_6g017860.1, Cs_ont_6g022110.1, Cs_ont_7g008640.1, Cs_ont_8g022200.1, Cs_ont_9g017840.1	SYT012150.1, SYT080900.1, SYT082630.1, SYT146730.1, SYT147790.1, SYT201090.1, SYT203240.1, SYT220000.1	Cic002440.1, Cic006100.1, Cic026020.1, Cic029600.1, Cic032570.1, Cic055560.1, Cic064540.1, Cic067210.1, Cic071890.1, Cic073180.1, Cic074650.1, Cic076260.1, Cic077320.1, Cic078170.1, Cic110040.1, Cic111080.1, Cic113600.1, Cic117580.1, Cic119170.1, Cic119180.1, Cic119280.1, Cic119290.1, Cic122770.1, Cic162620.1, Cic170530.1, Cic170540.1, Cic175240.1, Cic184530.1, Cic184820.1, Cic201760.1, Cic217590…		H1Y00808.1, H1Y02003.1, H1Y02204.1, H1Y03792.1, H1Y03864.1, H1Y04292.1, H1Y06167.1, H1Y06462.1, H1Y06602.1, H1Y06603.1, H1Y07014.1, H1Y07358.1, H1Y07513.1, H1Y07665.1, H1Y08169.1, H1Y10273.1, H1Y12041.1, H1Y12619.1, H1Y12628.1, H1Y12633.1, H1Y12658.1, H1Y12806.1, H1Y13142.1, H1Y13143.1, H1Y13951.1, H1Y14219.1, H1Y14759.1, H1Y14761.1, H1Y14762.1, H1Y14896.1, H1Y15180.1, H1Y15181.1, H1Y15196.1, H1Y…	H2Y01079.1, H2Y01558.1, H2Y01673.1, H2Y01715.1, H2Y01909.1, H2Y02282.1, H2Y02338.1, H2Y02744.1, H2Y02749.1, H2Y03368.1, H2Y03569.1, H2Y03803.1, H2Y03804.1, H2Y04042.1, H2Y04043.1, H2Y04099.1, H2Y04100.1, H2Y07115.1, H2Y08626.1, H2Y10009.1, H2Y10024.1, H2Y12709.1, H2Y12781.1, H2Y12837.1, H2Y13283.1, H2Y14266.1, H2Y14267.1, H2Y14638.1, H2Y14660.1, H2Y14661.1, H2Y14790.1, H2Y15145.1, H2Y16725.1, H2Y…
OG0012645		OG0000023	Aeg223510.1, Aeg233640.1, Aeg269320.1	Egl019890.1, Egl036650.1, Egl040720.1, Egl105450.1, Egl109850.1, Egl228630.1, Egl232790.1, Egl292450.1, Egl302740.1	Citropsis022510.1, Citropsis082120.1, Citropsis089180.1, Citropsis158270.1, Citropsis168920.1, Citropsis214140.1	CP1g000749.t1, CP1g000970.t1, CP1g001098.t1, CP1g001454.t1, CP1g002045.t1, CP1g003200.t1, CP2g000090.t1, CP2g002100.t1, CP2g002139.t1, CP2g003136.t1, CP3g002035.t1, CP3g002692.t1, CP3g003740.t1, CP4g001120.t1, CP4g001485.t1, CP5g002133.t1, CP5g002932.t1, CP5g003081.t1, CP5g003691.t1, CP5g003832.t1, CP5g003939.t1, CP5g004977.t1, CP6g000777.t1, CP6g001657.t1, CP6g001753.t1, CP6g002131.t1, CP7g00036…		Fh2g18120.1, Fh3g03350.1, Fh3g20310.1, Fh5g16420.1, Fh5g18640.1, Fh5g24060.1, Fh6g07610.1, Fh7g16180.1, Fh7g19030.1, Fh8g03500.1, Fh8g11680.1, Fh8g16190.1, Fh8g16260.1, Fh8g17520.1, Fh9g16940.1, Fh9g17480.1, FhUn00980.1	Chh000560.1, Chh037460.1, Chh039950.1, Chh044270.1, Chh142300.1, Chh187150.1, Chh282350.1	Abu1g_021290.1, Abu2g_006290.1, Abu2g_016990.1, Abu3g_001960.1, Abu3g_005960.1, Abu3g_010830.1, Abu5g_018670.1, Abu5g_022400.1, Abu8g_023080.1, Abu9g_010350.1	HP000630.1, HP001490.1, HP001560.1, HP016620.1, HP020070.1, HP033290.1, HP052430.1, HP059070.1, HP069190.1, HP070110.1, HP115670.1, HP128970.1, HP130820.1, HP131520.1, HP133910.1, HP148880.1, HP150530.1, HP152480.1, HP192310.1, HP214970.1, HP227810.1, HP259240.1, HP279760.1, HP280420.1, HP280470.1, HP280490.1, HP280520.1, HP281330.1	Cg5g030630.1			LW039060.1, LW100900.1, LW249370.1, LW268200.1, LW270320.1	Cms001730.1, Cms030900.1, Cms068710.1, Cms071620.1, Cms071900.1, Cms073160.1, Cms078810.1, Cms093650.1, Cms096300.1, Cms115980.1, Cms126820.1, Cms132630.1, Cms133560.1, Cms158250.1, Cms164580.1, Cms167230.1, Cms167550.1, Cms186610.1, Cms215970.1, Cms216950.1, Cms220200.1, Cms223430.1, Cms241440.1, Cms249000.1, Cms272950.1, Cms278120.1, Cms282810.1		Cs_ont_3g021120.1, Cs_ont_5g033360.1, Cs_ont_9g012090.1		Cic000320.1, Cic013280.1, Cic018590.1, Cic040300.1, Cic076930.1, Cic112140.1, Cic121820.1, Cic138690.1, Cic177580.1, Cic242020.1, Cic273250.1, Cic277340.1, Cic282820.1, Cic287490.1		H1Y01731.1, H1Y01733.1, H1Y02154.1, H1Y02895.1, H1Y03446.1, H1Y03746.1, H1Y04209.1, H1Y04404.1, H1Y05974.1, H1Y07609.1, H1Y07730.1, H1Y07878.1, H1Y08319.1, H1Y08394.1, H1Y09615.1, H1Y11785.1, H1Y12911.1, H1Y13219.1, H1Y13684.1, H1Y14568.1, H1Y15061.1, H1Y17911.1, H1Y18055.1, H1Y18954.1, H1Y21565.1, H1Y22441.1, H1Y22916.1, H1Y24292.1, H1Y24414.1, H1Y26764.1, H1Y27275.1, H1Y28545.1, H1Y29741.1, H1Y…	H2Y02218.1, H2Y02823.1, H2Y03143.1, H2Y03150.1, H2Y03155.1, H2Y03542.1, H2Y04152.1, H2Y07298.1, H2Y07414.1, H2Y07787.1, H2Y08910.1, H2Y09513.1, H2Y12905.1, H2Y12977.1, H2Y13013.1, H2Y13038.1, H2Y13060.1, H2Y13203.1, H2Y13237.1, H2Y13795.1, H2Y13833.1, H2Y14072.1, H2Y14339.1, H2Y14405.1, H2Y15066.1, H2Y15068.1, H2Y16174.1, H2Y16720.1, H2Y16869.1, H2Y17434.1, H2Y17636.1, H2Y17756.1, H2Y20283.1, H2Y…
OG0012647		OG0000024		Egl048870.1, Egl048880.1, Egl088190.1, Egl139400.1, Egl159010.1, Egl159030.1				Fh5g50150.1, Fh5g50160.1, Fh6g27870.1, Fh6g27880.1, Fh6g27900.1, Fh9g16360.1, Fh9g16370.1, FhUn14410.1, FhUn14440.1, FhUn14460.1, FhUn14490.1		Abuscaffold_6_000010.1		Cg1g000010.1, Cg1g000020.1, Cg1g000070.1, Cg1g000090.1, Cg1g000100.1, Cg1g000120.1, Cg1g000130.1, Cg1g000200.1, Cg1g000210.1, Cg1g002350.1, Cg2g005850.1, Cg2g043160.1, Cg3g019560.1, Cg3g019620.1, Cg3g019900.1, Cg3g019930.1, Cg3g019980.1, Cg3g026310.1, Cg3g026580.1, Cg3g026590.1, Cg3g026630.1, Cg3g026680.1, Cg3g026690.1, Cg3g026750.1, Cg3g026880.1, Cg3g026900.1, Cg3g026950.1, Cg3g027140.1, Cg3g027…			LW067060.1, LW067090.1, LW067130.1, LW067180.1, LW252560.1, LW262980.1, LW299330.1, LW306380.1	Cms042880.1, Cms112730.1, Cms112740.1, Cms112750.1, Cms112960.1, Cms113290.1, Cms177620.1, Cms208590.1, Cms272010.1	Cm050260.1, Cm174870.1, Cm263570.1, Cm301700.1, Cm319840.1			Cic015690.1, Cic191800.1, Cic200220.1, Cic200270.1, Cic200310.1, Cic200320.1, Cic200350.1, Cic233220.1, Cic233250.1, Cic237730.1, Cic287090.1, Cic287120.1, Cic293850.1		H1Y00163.1, H1Y01043.1, H1Y01047.1, H1Y01052.1, H1Y01058.1, H1Y01293.1, H1Y01305.1, H1Y01306.1, H1Y01351.1, H1Y01357.1, H1Y01389.1, H1Y01395.1, H1Y01399.1, H1Y01508.1, H1Y01521.1, H1Y01533.1, H1Y01555.1, H1Y01561.1, H1Y01565.1, H1Y01574.1, H1Y01580.1, H1Y01582.1, H1Y01598.1, H1Y01614.1, H1Y01625.1, H1Y01638.1, H1Y01645.1, H1Y01666.1, H1Y01668.1, H1Y01679.1, H1Y01682.1, H1Y01695.1, H1Y01696.1, H1Y…	H2Y00891.1, H2Y00900.1, H2Y00922.1, H2Y00933.1, H2Y00937.1, H2Y00938.1, H2Y00939.1, H2Y05219.1, H2Y09404.1, H2Y10284.1, H2Y10291.1, H2Y10973.1, H2Y10980.1, H2Y11006.1, H2Y11026.1, H2Y11052.1, H2Y11057.1, H2Y19367.1, H2Y19373.1, H2Y19378.1, H2Y19402.1, H2Y19404.1, H2Y20593.1, H2Y26251.1, H2Y26254.1, H2Y26542.1, H2Y26544.1, H2Y26548.1, H2Y26557.1, H2Y26559.1, H2Y33461.1, H2Y33462.1
OG0012649		OG0000025	Aeg000570.1, Aeg116180.1, Aeg116210.1	Egl110580.1, Egl193370.1, Egl193430.1, Egl193880.1, Egl193890.1, Egl193920.1, Egl193930.1, Egl193940.1, Egl194060.1, Egl194110.1, Egl194120.1, Egl194140.1	Citropsis065610.1, Citropsis123120.1, Citropsis123130.1, Citropsis123160.1, Citropsis123200.1, Citropsis123760.1, Citropsis123780.1, Citropsis123790.1, Citropsis123830.1, Citropsis123840.1, Citropsis123920.1, Citropsis150170.1, Citropsis258230.1	CP8g001133.t1, CP8g001134.t1, CP8g001137.t1, CP8g001142.t1, CP8g001143.t1, CP8g001144.t1, CP8g001146.t1, CP8g001149.t1, CP8g001150.t1, CP8g001209.t1, CP8g001212.t1, CP8g001214.t1, CP8g001216.t1, CP8g001217.t1, CP8g001218.t1, CP8g001221.t1	Ciclev10029998m.1, Ciclev10030075m.1, Ciclev10030216m.1	Fh8g09210.1, Fh8g09220.1, Fh8g09240.1, Fh8g09860.1, Fh8g09880.1, Fh8g09900.1, Fh8g09920.1, Fh8g09960.1, Fh8g09990.1, Fh8g10000.1	Chh076580.1, Chh091630.1, Chh091640.1, Chh091650.1, Chh091660.1, Chh091710.1, Chh091730.1, Chh091770.1, Chh091810.1, Chh091820.1, Chh091860.1, Chh091880.1, Chh091920.1, Chh091930.1, Chh092520.1, Chh092530.1, Chh092560.1, Chh092570.1, Chh092580.1, Chh092590.1, Chh092610.1, Chh092620.1, Chh092660.1, Chh284620.1, Chh284630.1, Chh284650.1, Chh284660.1, Chh284710.1	Abu8g_020870.1, Abu8g_020910.1, Abu8g_020940.1, Abu8g_020970.1, Abu8g_021500.1, Abu8g_021510.1, Abu8g_021520.1, Abu8g_021530.1, Abu8g_021560.1, Abu8g_021570.1, Abu8g_021590.1	HP053780.1, HP053810.1, HP175040.1, HP175050.1, HP175080.1, HP189000.1, HP189030.1, HP189050.1, HP189070.1, HP189430.1, HP189440.1, HP189540.1, HP287630.1, HP287660.1	Cg1g011160.1, Cg4g009510.1, Cg8g008960.1, Cg8g009010.1, Cg8g009020.1, Cg8g009030.1, Cg8g009040.1, Cg8g009070.1, Cg8g009150.1, Cg8g009180.1, Cg8g009230.1, Cg8g009240.1, Cg8g009370.1, Cg8g009400.1, Cg8g009410.1, Cg8g009460.1, Cg8g009490.1, Cg8g009500.1, Cg8g009520.1, Cg8g009610.1, CgUng006490.1, CgUng006510.1, CgUng006530.1, CgUng006550.1, CgUng006580.1, CgUng006590.1, CgUng010600.1, CgUng015360.1,…	Cmt037290.1	JLX053300.1, JLX053510.1, JLX168150.1	LW149970.1, LW149980.1, LW150040.1, LW150070.1, LW150110.1, LW150250.1, LW150260.1, LW150300.1, LW150310.1, LW150350.1, LW150490.1, LW150500.1, LW150520.1, LW150550.1, LW150600.1, LW150610.1, LW151050.1, LW151060.1, LW157200.1	Cms015390.1, Cms015430.1, Cms015440.1, Cms015890.1, Cms015910.1, Cms015930.1, Cms130620.1, Cms130650.1, Cms130670.1, Cms130710.1, Cms239150.1, Cms239210.1, Cms239230.1, Cms239280.1, Cms239330.1, Cms239360.1, Cms239370.1, Cms239380.1, Cms239390.1	Cm001330.1, Cm001350.1, Cm001420.1, Cm001430.1, Cm001440.1, Cm001470.1, Cm001480.1, Cm001490.1, Cm001500.1, Cm001900.1, Cm001930.1, Cm001950.1, Cm103390.1, Cm272840.1, Cm272870.1, Cm273430.1, Cm305640.1, Cm320410.1	Cs_ont_8g019160.1, Cs_ont_8g019180.1, Cs_ont_8g019210.1, Cs_ont_8g019690.1, Cs_ont_8g019700.1, Cs_ont_8g019720.1, Cs_ont_8g019780.1, Cs_ont_8g019890.1, Cs_ont_8g019940.1, Cs_ont_8g019960.1, Cs_ont_8g019970.1	SYT166400.1, SYT166710.1, SYT166720.1, SYT166730.1, SYT166750.1, SYT242990.1	Cic275480.1, Cic276110.1, Cic276120.1, Cic276140.1, Cic276180.1	PtUn000160.1, PtUn000170.1, PtUn000180.1, PtUn017220.1, PtUn017240.1, PtUn017260.1, PtUn018190.1, PtUn018200.1, PtUn018220.1	H1Y36465.1, H1Y36472.1, H1Y36476.1, H1Y36483.1, H1Y36484.1, H1Y36490.1, H1Y36492.1, H1Y36559.1, H1Y36560.1, H1Y36565.1, H1Y36568.1, H1Y36571.1, H1Y36572.1, H1Y36578.1, H1Y36579.1, H1Y36580.1, H1Y36583.1, H1Y36584.1	H2Y36377.1, H2Y36380.1, H2Y36384.1, H2Y36386.1, H2Y36388.1, H2Y36393.1, H2Y36470.1, H2Y36471.1, H2Y36476.1, H2Y36481.1, H2Y36496.1, H2Y36504.1, H2Y36506.1, H2Y36507.1, H2Y36509.1, H2Y36513.1, H2Y36515.1, H2Y36520.1, H2Y36528.1, H2Y36530.1
OG0012650		OG0000026	Aeg001170.1, Aeg005540.1, Aeg029370.1, Aeg142620.1, Aeg142630.1, Aeg142660.1, Aeg142670.1, Aeg142680.1, Aeg142700.1, Aeg142720.1, Aeg142740.1, Aeg142750.1, Aeg142760.1, Aeg233460.1	Egl037320.1, Egl037330.1, Egl037440.1, Egl037460.1, Egl067870.1, Egl067880.1, Egl114850.1, Egl114860.1, Egl114870.1, Egl195460.1, Egl304340.1, Egl304360.1, Egl304370.1, Egl304450.1, Egl304470.1, Egl304510.1, Egl304550.1, Egl304560.1, Egl304610.1, Egl304620.1, Egl315490.1, Egl315500.1	Citropsis157980.1, Citropsis212200.1, Citropsis212210.1, Citropsis212410.1, Citropsis212450.1, Citropsis212470.1, Citropsis212480.1, Citropsis236830.1, Citropsis236860.1, Citropsis236890.1, Citropsis236940.1, Citropsis236950.1, Citropsis236970.1	CP1g000799.t1, CP1g000800.t1, CP3g001474.t1, CP3g002586.t1, CP3g002591.t1, CP3g002592.t1, CP3g002593.t1, CP3g002596.t1, CP3g002600.t1, CP3g002609.t1, CP3g002618.t1, CP3g002621.t1, CP3g002627.t1, CP3g002628.t1, CP3g002633.t1, CP3g002636.t1, CP3g002637.t1, CP3g002640.t1, CP3g002647.t1, CP3g002648.t1, CP3g003706.t1, CP3g003708.t1, CP3g003710.t1, CP6g002023.t1, CP9g001826.t1, CP9g001827.t1, CP9g00182…	Ciclev10000066m.1, Ciclev10000091m.1, Ciclev10000111m.1, Ciclev10000112m.1, Ciclev10000113m.1, Ciclev10000114m.1, Ciclev10000223m.1, Ciclev10000338m.1, Ciclev10003121m.1, Ciclev10003135m.1, Ciclev10003155m.1, Ciclev10003416m.1, Ciclev10003759m.1, Ciclev10003762m.1, Ciclev10003899m.1, Ciclev10004022m.1, Ciclev10004054m.1, Ciclev10011043m.1	Fh1g24480.1, Fh1g24490.1, Fh3g06100.1, Fh3g06150.1, Fh3g14860.1, Fh3g14890.1, Fh3g25460.1, Fh6g08930.1, Fh9g17360.1	Chh065520.1, Chh071450.1, Chh071460.1, Chh071480.1, Chh103840.1, Chh103860.1, Chh103870.1, Chh174860.1, Chh174870.1, Chh174880.1, Chh174970.1, Chh190180.1, Chh259690.1, Chh286180.1	Abu3g_003290.1, Abu3g_007810.1, Abu3g_007840.1, Abu3g_007850.1, Abu3g_007910.1, Abu6g_017350.1	HP032770.1, HP151510.1, HP172340.1	Cg1g024450.1, Cg2g032530.1, Cg3g001210.1, Cg3g002890.1, Cg3g007430.1, Cg3g007450.1, Cg3g007500.1, Cg3g009090.1, Cg3g009140.1, Cg3g009170.1, Cg3g009190.1, Cg6g003070.1, Cg9g016830.1	Cmt106780.1, Cmt112770.1	JLX010270.1, JLX083550.1, JLX103890.1, JLX119280.1, JLX183250.1, JLX231680.1	LW036360.1, LW051720.1, LW072510.1, LW138370.1, LW270630.1, LW270640.1, LW283930.1, LW283940.1, LW283980.1, LW283990.1, LW284010.1, LW284030.1, LW284070.1, LW284120.1, LW284160.1, LW284180.1, LW284190.1, LW284220.1, LW284230.1	Cms031720.1, Cms031750.1, Cms162800.1, Cms162820.1, Cms267400.1, Cms267410.1	Cm007260.1, Cm113950.1, Cm172590.1, Cm207090.1, Cm207100.1, Cm228510.1, Cm231400.1, Cm231410.1, Cm231450.1, Cm253130.1, Cm276610.1, Cm276620.1, Cm284130.1, Cm296980.1	Cs_ont_1g006420.1, Cs_ont_3g014180.1, Cs_ont_3g021990.1, Cs_ont_3g022030.1, Cs_ont_3g022040.1, Cs_ont_3g022080.1, Cs_ont_3g022100.1, Cs_ont_3g022120.1, Cs_ont_3g022140.1, Cs_ont_3g022190.1, Cs_ont_3g022200.1, Cs_ont_3g022240.1, Cs_ont_3g029430.1, Cs_ont_3g029450.1, Cs_ont_3g030500.1, Cs_ont_6g019000.1	SYT001090.1, SYT025890.1, SYT061000.1, SYT061010.1, SYT069480.1, SYT087150.1, SYT109940.1, SYT123820.1, SYT141970.1, SYT150090.1, SYT150110.1, SYT174850.1, SYT209520.1, SYT210610.1, SYT211360.1, SYT216400.1, SYT220060.1, SYT225960.1, SYT225990.1	Cic269610.1, Cic269650.1	Pt5g012620.1, Pt5g019020.1, Pt5g019120.1, Pt5g019140.1, Pt5g021520.1, Pt5g024480.1, Pt6g016680.1, Pt6g016690.1, PtUn015550.1, PtUn015570.1, PtUn015580.1, PtUn015610.1, PtUn015620.1, PtUn015630.1, PtUn028360.1, PtUn028370.1, PtUn031670.1	H1Y02942.1, H1Y12240.1, H1Y13535.1, H1Y13539.1, H1Y13542.1, H1Y13544.1, H1Y13557.1, H1Y13565.1, H1Y13567.1, H1Y13570.1, H1Y13572.1, H1Y13576.1, H1Y13582.1, H1Y13589.1, H1Y13591.1, H1Y14943.1, H1Y14945.1, H1Y14946.1, H1Y28724.1	H2Y02448.1, H2Y11965.1, H2Y13124.1, H2Y13126.1, H2Y13128.1, H2Y13132.1, H2Y13135.1, H2Y13144.1, H2Y13149.1, H2Y13153.1, H2Y14478.1, H2Y14480.1, H2Y28515.1, H2Y40342.1
OG0012653		OG0000027	Aeg020320.1, Aeg169050.1, Aeg169060.1, Aeg169170.1, Aeg169190.1, Aeg169200.1, Aeg169480.1, Aeg232080.1, Aeg232100.1	Egl016640.1, Egl216790.1, Egl236040.1, Egl236080.1, Egl236140.1, Egl236160.1, Egl236350.1, Egl290840.1, Egl290860.1, Egl290900.1, Egl290920.1, Egl290930.1	Citropsis067820.1, Citropsis072410.1, Citropsis091900.1, Citropsis091910.1, Citropsis147070.1, Citropsis147140.1, Citropsis147190.1, Citropsis147690.1, Citropsis147750.1, Citropsis147900.1, Citropsis147920.1, Citropsis147930.1, Citropsis147950.1, Citropsis148060.1, Citropsis148070.1, Citropsis148090.1, Citropsis212800.1, Citropsis238690.1, Citropsis238720.1, Citropsis238780.1, Citropsis238790.1	CP4g000759.t1, CP4g001432.t1, CP4g001433.t1, CP4g001436.t1, CP5g002307.t1, CP5g002309.t1, CP5g002314.t1, CP5g002315.t1, CP5g002316.t1, CP5g002328.t1, CP5g002330.t1, CP5g002337.t1, CP5g002345.t1, CP5g002350.t1, CP5g002354.t1, CP5g002355.t1, CP5g002436.t1, CP5g002437.t1, CP5g002439.t1, CP5g002450.t1, CP5g002454.t1, CP5g002456.t1, CP5g002457.t1, CP5g002459.t1, CP5g002463.t1, CP5g002465.t1, CP5g00246…	Ciclev10004188m.1, Ciclev10006796m.1, Ciclev10007315m.1, Ciclev10010250m.1, Ciclev10013431m.1, Ciclev10018491m.1, Ciclev10018492m.1, Ciclev10018499m.1, Ciclev10018504m.1, Ciclev10018507m.1, Ciclev10018509m.1, Ciclev10018510m.1, Ciclev10018531m.1, Ciclev10018540m.1, Ciclev10018594m.1, Ciclev10018688m.1, Ciclev10023260m.1, Ciclev10023481m.1, Ciclev10023525m.1, Ciclev10023613m.1, Ciclev10023669m.1, …	Fh4g19120.1, Fh4g19130.1, Fh4g19140.1, Fh4g25280.1, Fh5g27790.1, Fh5g28000.1, Fh5g28020.1, Fh5g28050.1, Fh5g28130.1, Fh5g28160.1, Fh5g28180.1, Fh5g28220.1, Fh5g28270.1, Fh5g28410.1, Fh5g28430.1, Fh5g28460.1, Fh5g28920.1, Fh5g28930.1, Fh5g28940.1, Fh5g28970.1, Fh5g28990.1, Fh5g29030.1, Fh5g29040.1, Fh5g29050.1, Fh5g29090.1, Fh6g19750.1, Fh9g10380.1, Fh9g10410.1, Fh9g10480.1		Abu5g_018620.1, Abu5g_018630.1, Abu5g_018640.1, Abu5g_018650.1, Abu5g_021410.1, Abu5g_021470.1, Abu5g_021490.1	HP004350.1, HP004610.1, HP004750.1, HP203180.1, HP246890.1, HP247510.1, HP262190.1, HP262210.1, HP262240.1	Cg2g015730.1, Cg2g016310.1, Cg2g016410.1, Cg2g016460.1, Cg2g016500.1, Cg2g016520.1, Cg2g016560.1, Cg2g022530.1, Cg5g023080.1, Cg9g010160.1, Cg9g010200.1, Cg9g010240.1	Cmt080970.1, Cmt199720.1	JLX164560.1	LW109360.1, LW109660.1, LW109710.1, LW110050.1, LW110080.1, LW110100.1, LW110700.1, LW110760.1, LW266520.1, LW266530.1, LW266560.1, LW266590.1	Cms030970.1, Cms065100.1, Cms116220.1, Cms153770.1, Cms153780.1, Cms153790.1, Cms153800.1, Cms153810.1, Cms153830.1, Cms153840.1, Cms155880.1, Cms156280.1, Cms156300.1, Cms156390.1, Cms156480.1, Cms178720.1	Cm005220.1, Cm005250.1, Cm022390.1, Cm118580.1, Cm139920.1, Cm277240.1	Cs_ont_4g016230.1, Cs_ont_5g021920.1, Cs_ont_5g022760.1, Cs_ont_5g022910.1, Cs_ont_6g008290.1, Cs_ont_9g010450.1, Cs_ont_9g010490.1, Cs_ont_9g010520.1	SYT081630.1, SYT103510.1, SYT103800.1, SYT103890.1, SYT103920.1, SYT103990.1	Cic242950.1	Pt3g021040.1, Pt3g021050.1, Pt3g021420.1	H1Y01007.1, H1Y01067.1, H1Y18119.1, H1Y18120.1, H1Y18860.1, H1Y18861.1, H1Y22275.1, H1Y22278.1, H1Y22286.1, H1Y22289.1, H1Y22294.1, H1Y22301.1, H1Y22304.1, H1Y22403.1, H1Y22425.1, H1Y22431.1, H1Y22434.1, H1Y22449.1, H1Y22452.1, H1Y22492.1, H1Y27394.1, H1Y39116.1, H1Y39118.1, H1Y39121.1, H1Y39124.1, H1Y39131.1	H2Y17721.1, H2Y17725.1, H2Y17728.1, H2Y17730.1, H2Y18546.1, H2Y18547.1, H2Y22044.1, H2Y22056.1, H2Y22069.1, H2Y22083.1, H2Y22093.1, H2Y22099.1, H2Y22107.1, H2Y22224.1, H2Y22225.1, H2Y22243.1, H2Y22251.1, H2Y22261.1, H2Y22283.1, H2Y22289.1, H2Y22294.1, H2Y22306.1, H2Y27215.1, H2Y39003.1, H2Y39006.1, H2Y39008.1, H2Y39012.1, H2Y39019.1
OG0012654		OG0000028	Aeg165940.1, Aeg168460.1, Aeg168470.1	Egl237900.1, Egl300620.1	Citropsis023790.1, Citropsis146000.1, Citropsis146030.1, Citropsis146130.1, Citropsis146310.1, Citropsis146360.1, Citropsis146400.1, Citropsis146520.1, Citropsis146790.1, Citropsis146800.1, Citropsis150760.1	CP5g001790.t1, CP5g001791.t1, CP5g001793.t1, CP5g001897.t1, CP5g002147.t1, CP5g002152.t1, CP5g002154.t1, CP5g002158.t1, CP5g002159.t1, CP5g002160.t1, CP5g002163.t1, CP5g002166.t1, CP5g002185.t1, CP5g002193.t1, CP5g002196.t1, CP5g002200.t1, CP5g002203.t1, CP5g002204.t1, CP5g002209.t1, CP5g002213.t1, CP5g002233.t1, CP5g002246.t1, CP5g002251.t1, CP5g002252.t1, CP5g002683.t1, CP5g003095.t1, CP5g00333…	Ciclev10013959m.1, Ciclev10013960m.1, Ciclev10013961m.1, Ciclev10018520m.1, Ciclev10018524m.1, Ciclev10018526m.1, Ciclev10018528m.1, Ciclev10018529m.1, Ciclev10018537m.1, Ciclev10018544m.1, Ciclev10018553m.1, Ciclev10018571m.1, Ciclev10018573m.1, Ciclev10018586m.1, Ciclev10018611m.1, Ciclev10018624m.1, Ciclev10018835m.1, Ciclev10019599m.1, Ciclev10023418m.1, Ciclev10023454m.1, Ciclev10023529m.1, …	Fh5g11510.1, Fh5g22510.1, Fh5g22560.1, Fh5g22630.1, Fh5g24150.1, Fh5g24170.1, Fh5g29430.1, Fh5g29440.1, Fh5g29500.1, Fh5g29640.1, Fh5g29680.1, Fh5g29710.1, Fh5g29750.1, Fh5g29760.1, Fh5g29800.1, Fh5g29810.1, Fh5g29870.1, Fh5g29960.1, Fh5g29970.1, Fh5g29990.1, Fh5g30010.1, Fh5g30040.1, Fh5g30050.1, Fh5g30060.1, Fh5g30090.1, Fh5g30130.1, Fh5g31950.1, Fh5g33000.1, Fh5g33030.1, Fh5g33040.1	Chh061170.1, Chh062990.1, Chh144510.1, Chh144520.1, Chh144690.1, Chh144840.1, Chh237860.1, Chh274100.1, Chh274110.1, Chh274130.1, Chh274490.1, Chh274520.1	Abu3g_008280.1, Abu5g_016380.1, Abu5g_020080.1, Abu5g_020200.1, Abu5g_020320.1, Abu5g_020330.1, Abu5g_020440.1, Abu5g_020680.1, Abu5g_020690.1, Abu5g_023730.1, Abu5g_024060.1, Abu5g_025740.1, Abu5g_025830.1	HP005310.1, HP005360.1, HP005770.1, HP005790.1, HP008750.1, HP008760.1	Cg2g016860.1, Cg2g016870.1, Cg5g025100.1	Cmt081860.1	JLX151380.1, JLX188360.1	LW106210.1, LW111130.1, LW111140.1, LW111330.1, LW111350.1, LW111380.1, LW111420.1, LW111630.1, LW111710.1, LW111800.1, LW111820.1, LW111830.1, LW113670.1, LW114720.1	Cms116490.1	Cm144000.1	Cs_ont_5g018340.1, Cs_ont_5g020200.1, Cs_ont_5g020210.1, Cs_ont_5g020330.1, Cs_ont_5g020430.1, Cs_ont_5g020660.1, Cs_ont_5g020930.1, Cs_ont_5g021250.1, Cs_ont_5g027010.1, Cs_ont_5g028720.1	SYT002700.1, SYT003590.1, SYT003630.1, SYT043320.1, SYT043580.1, SYT052980.1, SYT072480.1, SYT141520.1, SYT211450.1, SYT211470.1, SYT211740.1, SYT252810.1	Cic117080.1, Cic168260.1, Cic168420.1, Cic181980.1, Cic184100.1	PtUn028100.1	H1Y21670.1, H1Y21805.1, H1Y22074.1, H1Y22078.1, H1Y22088.1, H1Y22092.1, H1Y22096.1, H1Y22102.1, H1Y22107.1, H1Y22108.1, H1Y22121.1, H1Y22133.1, H1Y22140.1, H1Y22144.1, H1Y22150.1, H1Y22155.1, H1Y22163.1, H1Y22167.1, H1Y22181.1, H1Y22205.1, H1Y22212.1, H1Y22216.1, H1Y22217.1, H1Y22644.1, H1Y23249.1, H1Y23536.1, H1Y23543.1, H1Y25152.1	H2Y01070.1, H2Y01084.1, H2Y21372.1, H2Y21534.1, H2Y21796.1, H2Y21799.1, H2Y21802.1, H2Y21807.1, H2Y21812.1, H2Y21824.1, H2Y21837.1, H2Y21851.1, H2Y21852.1, H2Y21862.1, H2Y21863.1, H2Y21869.1, H2Y21874.1, H2Y21877.1, H2Y21882.1, H2Y21901.1, H2Y21909.1, H2Y21913.1, H2Y21917.1, H2Y21922.1, H2Y21927.1, H2Y21932.1, H2Y21939.1, H2Y21945.1, H2Y21949.1, H2Y21969.1, H2Y21977.1, H2Y21985.1, H2Y21986.1, H2Y…
OG0012655		OG0000029		Egl089680.1				Fh5g50120.1, FhUn14470.1				Cg3g016240.1, Cg3g016270.1, Cg3g019520.1, Cg3g019570.1, Cg3g019710.1, Cg3g019970.1, Cg3g020090.1, Cg3g020140.1, Cg3g026220.1, Cg3g026360.1, Cg3g026480.1, Cg3g026910.1, Cg3g026970.1, Cg3g027210.1, Cg5g035030.1, Cg5g045160.1, Cg5g045300.1, Cg5g045660.1, Cg5g045770.1, Cg6g021110.1, Cg6g021200.1, Cg6g021970.1, Cg6g021990.1, Cg6g022040.1, Cg6g022320.1, Cg6g022550.1, Cg6g022790.1, Cg6g022980.1, Cg8g014…			LW028040.1, LW028050.1, LW262990.1	Cms112670.1, Cms112690.1, Cms112810.1, Cms113180.1, Cms113210.1, Cms113480.1, Cms113600.1, Cms178090.1, Cms208640.1	Cm032550.1, Cm033590.1, Cm033600.1, Cm066120.1, Cm174820.1, Cm174840.1, Cm174890.1, Cm174920.1, Cm174930.1, Cm205070.1, Cm279260.1, Cm301710.1, Cm301720.1, Cm307290.1, Cm307310.1, Cm314310.1, Cm316960.1			Cic015010.1, Cic015630.1, Cic015670.1, Cic191780.1, Cic191830.1, Cic231920.1, Cic231930.1, Cic231940.1, Cic231970.1, Cic237740.1, Cic237750.1, Cic237760.1, Cic237790.1, Cic270850.1, Cic270910.1, Cic270920.1, Cic287020.1, Cic287070.1, Cic287100.1		H1Y00161.1, H1Y00164.1, H1Y01012.1, H1Y01019.1, H1Y01027.1, H1Y01030.1, H1Y01032.1, H1Y01033.1, H1Y01035.1, H1Y01037.1, H1Y01039.1, H1Y01045.1, H1Y01046.1, H1Y01051.1, H1Y01053.1, H1Y01055.1, H1Y01059.1, H1Y01287.1, H1Y01289.1, H1Y01301.1, H1Y01361.1, H1Y01363.1, H1Y01366.1, H1Y01383.1, H1Y01385.1, H1Y01391.1, H1Y01393.1, H1Y01509.1, H1Y01511.1, H1Y01513.1, H1Y01518.1, H1Y01527.1, H1Y01536.1, H1Y…	H2Y00901.1, H2Y00909.1, H2Y00911.1, H2Y00913.1, H2Y00916.1, H2Y00919.1, H2Y00927.1, H2Y00931.1, H2Y00943.1, H2Y00946.1, H2Y05205.1, H2Y05217.1, H2Y10292.1, H2Y10301.1, H2Y10981.1, H2Y10988.1, H2Y10991.1, H2Y10994.1, H2Y10998.1, H2Y11002.1, H2Y11005.1, H2Y11009.1, H2Y11013.1, H2Y11018.1, H2Y11021.1, H2Y11025.1, H2Y11029.1, H2Y11030.1, H2Y11033.1, H2Y11036.1, H2Y11039.1, H2Y11040.1, H2Y11041.1, H2Y…
OG0012656		OG0000030	Aeg028640.1, Aeg045740.1, Aeg080650.1, Aeg080720.1, Aeg107190.1, Aeg118310.1, Aeg138210.1, Aeg138480.1, Aeg182470.1, Aeg206600.1, Aeg217050.1, Aeg270700.1, Aeg272350.1	Egl115070.1, Egl115150.1, Egl126990.1, Egl127060.1, Egl188750.1, Egl194450.1, Egl196620.1, Egl196640.1, Egl205360.1, Egl205430.1, Egl212710.1, Egl212970.1, Egl306900.1, Egl306960.1	Citropsis044340.1, Citropsis044380.1, Citropsis061410.1, Citropsis061480.1, Citropsis099780.1, Citropsis121130.1, Citropsis180900.1, Citropsis215430.1, Citropsis215480.1, Citropsis276000.1	CP1g001275.t1, CP1g001282.t1, CP3g001584.t1, CP3g001611.t1, CP5g005719.t1, CP6g001906.t1, CP7g002989.t1, CP7g002997.t1, CP8g000809.t1, CP8g000812.t1, CP8g000815.t1, CP8g000817.t1, CP8g000823.t1, CP8g003062.t1, CP8g003064.t1	Ciclev10000531m.1, Ciclev10003341m.1, Ciclev10003511m.1, Ciclev10011260m.1, Ciclev10019184m.1, Ciclev10025102m.1, Ciclev10025114m.1, Ciclev10027975m.1, Ciclev10027981m.1, Ciclev10028007m.1, Ciclev10029824m.1, Ciclev10030032m.1, Ciclev10030400m.1, Ciclev10030928m.1, Ciclev10033622m.1	Fh1g18990.1, Fh1g19020.1, Fh1g19050.1, Fh3g24020.1, Fh3g24280.1, Fh3g24380.1, Fh5g00900.1, Fh6g10080.1, Fh7g03700.1, Fh7g03770.1, Fh8g06480.1, Fh8g06530.1, Fh8g27280.1, Fh8g27300.1	Chh100140.1, Chh100400.1, Chh100430.1, Chh139650.1, Chh144920.1, Chh212050.1, Chh212160.1, Chh290820.1, Chh290880.1, Chh290900.1, Chh303070.1, Chh303140.1	Abu1g_017300.1, Abu1g_017320.1, Abu3g_012250.1, Abu3g_012490.1, Abu3g_012500.1, Abu5g_045010.1, Abu6g_016590.1, Abu7g_003890.1, Abu7g_003960.1, Abu8g_010460.1, Abu8g_010480.1, Abu8g_018690.1, Abu8g_018760.1, Abu8g_018880.1, Abu8g_018930.1	HP014800.1, HP033530.1, HP033880.1, HP096310.1, HP118330.1, HP118390.1, HP157900.1, HP186780.1, HP241380.1, HP273840.1, HP285430.1, HP285490.1		Cmt003890.1, Cmt003960.1, Cmt034520.1, Cmt034540.1, Cmt034590.1, Cmt052000.1, Cmt056240.1, Cmt118420.1, Cmt118650.1, Cmt118710.1, Cmt239130.1, Cmt239300.1, Cmt264870.1, Cmt264950.1	JLX056670.1, JLX099420.1, JLX117280.1, JLX119640.1, JLX129080.1, JLX131260.1, JLX161800.1, JLX162330.1, JLX182710.1, JLX190270.1, JLX191380.1	LW021270.1, LW037410.1, LW081290.1, LW081310.1, LW139410.1, LW139670.1, LW147090.1, LW147160.1, LW174410.1, LW174480.1, LW307540.1, LW307590.1	Cms012460.1, Cms029860.1, Cms030140.1, Cms036520.1, Cms036550.1, Cms036610.1, Cms068570.1, Cms089170.1, Cms089260.1, Cms094890.1, Cms094920.1, Cms188360.1, Cms188430.1, Cms195320.1, Cms195340.1	Cm057630.1, Cm057820.1, Cm091070.1, Cm091320.1, Cm124670.1, Cm166370.1, Cm195500.1, Cm209410.1, Cm209480.1, Cm244910.1, Cm244930.1, Cm276660.1, Cm302020.1, Cm307860.1	Cs_ont_1g010380.1, Cs_ont_1g010810.1, Cs_ont_3g015170.1, Cs_ont_3g015240.1, Cs_ont_3g015510.1, Cs_ont_5g049900.1, Cs_ont_6g017960.1, Cs_ont_7g003890.1, Cs_ont_7g003960.1, Cs_ont_8g002910.1, Cs_ont_8g002920.1, Cs_ont_8g022710.1, Cs_ont_8g022770.1, Cs_ont_8g022800.1, Cs_ont_8g022810.1, Cs_ont_8g022830.1, Cs_ont_8g022860.1	SYT013160.1, SYT013190.1, SYT019460.1, SYT019530.1, SYT024850.1, SYT050200.1, SYT082310.1, SYT099350.1, SYT168390.1, SYT168430.1, SYT168440.1, SYT168450.1, SYT192650.1, SYT195980.1, SYT227860.1	Cic057870.1	Pt3g003460.1, Pt4g019290.1, Pt4g019360.1, Pt6g015860.1, Pt7g005520.1, Pt7g005660.1, Pt8g009960.1, Pt8g009970.1, PtUn002280.1, PtUn002330.1, PtUn011980.1	H1Y03569.1, H1Y03576.1, H1Y12360.1, H1Y12389.1, H1Y26385.1, H1Y28572.1, H1Y30407.1, H1Y30414.1, H1Y34256.1, H1Y34258.1, H1Y36939.1, H1Y36945.1	H2Y03106.1, H2Y03109.1, H2Y03114.1, H2Y03119.1, H2Y12078.1, H2Y12110.1, H2Y26135.1, H2Y28352.1, H2Y30178.1, H2Y30185.1, H2Y33831.1, H2Y33832.1, H2Y36904.1, H2Y36911.1, H2Y36917.1, H2Y36924.1
OG0012658		OG0000031	Aeg098300.1, Aeg098330.1, Aeg098340.1, Aeg099040.1, Aeg178500.1, Aeg178510.1, Aeg178520.1	Egl034120.1, Egl034130.1, Egl034140.1, Egl034230.1, Egl041900.1, Egl041910.1, Egl041940.1, Egl041950.1, Egl041990.1, Egl042050.1, Egl074070.1, Egl074150.1, Egl074160.1, Egl074170.1, Egl113690.1, Egl124590.1, Egl133500.1, Egl133510.1, Egl133520.1, Egl133530.1, Egl133540.1, Egl133940.1, Egl133950.1, Egl133970.1, Egl134000.1, Egl134010.1, Egl134020.1, Egl134030.1, Egl217960.1, Egl286040.1	Citropsis075310.1, Citropsis075330.1, Citropsis075360.1, Citropsis076230.1, Citropsis076240.1, Citropsis076250.1, Citropsis076260.1, Citropsis170480.1, Citropsis239260.1, Citropsis239270.1	CP4g001091.t1, CP4g001092.t1, CP4g001095.t1, CP4g001096.t1, CP4g001098.t1, CP4g001102.t1, CP4g001103.t1, CP4g001104.t1, CP4g001154.t1, CP4g001168.t1, CP4g001169.t1, CP4g001178.t1, CP4g001193.t1, CP4g001242.t1, CP4g001245.t1, CP4g001246.t1, CP4g001258.t1, CP4g001259.t1, CP4g001260.t1, CP4g001261.t1, CP4g001262.t1, CP4g001263.t1, CP4g001264.t1, CP4g001265.t1, CP4g001266.t1, CP8g002232.t1, CP8g00236…	Ciclev10007334m.1, Ciclev10007341m.1, Ciclev10007373m.1, Ciclev10007379m.1, Ciclev10007386m.1, Ciclev10010225m.1, Ciclev10010312m.1, Ciclev10010405m.1, Ciclev10010467m.1, Ciclev10010469m.1, Ciclev10010471m.1, Ciclev10010475m.1, Ciclev10010520m.1, Ciclev10010699m.1, Ciclev10010752m.1, Ciclev10010776m.1, Ciclev10010803m.1, Ciclev10010811m.1, Ciclev10027376m.1, Ciclev10027808m.1, Ciclev10027879m.1, …	Fh1g28690.1, Fh4g20810.1, Fh4g20850.1, Fh4g20890.1, Fh4g20950.1, Fh4g20960.1, Fh4g20990.1, Fh4g21050.1, Fh4g21540.1, Fh4g21550.1, Fh4g21950.1, Fh4g21960.1, Fh4g21970.1, Fh4g22010.1, Fh4g22060.1, Fh4g22090.1, Fh4g22120.1, Fh8g21520.1, Fh8g21560.1, Fh8g21590.1, Fh8g21610.1				Cg1g001720.1, Cg1g001730.1, Cg1g001750.1, Cg1g027200.1, Cg2g023790.1, Cg2g023800.1, Cg2g023810.1, Cg2g023820.1, Cg2g023840.1, Cg2g023850.1, Cg2g023860.1, Cg2g023890.1, Cg2g024330.1, Cg2g024400.1, Cg2g024410.1, Cg2g024510.1, Cg2g024530.1, Cg2g024540.1, Cg2g024930.1, Cg2g024940.1, Cg2g024950.1, Cg2g024980.1, Cg2g025000.1, Cg2g025060.1, Cg4g012030.1, Cg4g012070.1, Cg4g012080.1, Cg7g001320.1, Cg7g001…		JLX107780.1, JLX108010.1, JLX109000.1, JLX109440.1, JLX109450.1, JLX109780.1, JLX112320.1, JLX112890.1, JLX115200.1, JLX115220.1, JLX115510.1, JLX175960.1, JLX180280.1		Cms235540.1, Cms235560.1, Cms235570.1, Cms235580.1, Cms243990.1, Cms269400.1, Cms269470.1, Cms269570.1, Cms269960.1	Cm116320.1, Cm116330.1, Cm192570.1, Cm192620.1, Cm192630.1, Cm218560.1, Cm237030.1	Cs_ont_4g017490.1, Cs_ont_4g017980.1, Cs_ont_4g018240.1, Cs_ont_8g010100.1			Pt1g013500.1, Pt1g013580.1, Pt1g014010.1, Pt1g014020.1, Pt1g014370.1, Pt1g014400.1	H1Y18304.1, H1Y18306.1, H1Y18307.1, H1Y18313.1, H1Y18318.1, H1Y18319.1, H1Y18320.1, H1Y18375.1, H1Y18376.1, H1Y18394.1, H1Y18395.1, H1Y18411.1, H1Y18412.1, H1Y18452.1, H1Y34944.1, H1Y34958.1, H1Y34964.1, H1Y34967.1, H1Y34973.1, H1Y35129.1	H2Y01915.1, H2Y17964.1, H2Y17967.1, H2Y17976.1, H2Y17979.1, H2Y17980.1, H2Y18102.1, H2Y18103.1, H2Y18144.1, H2Y34499.1, H2Y34504.1, H2Y34510.1, H2Y34514.1, H2Y34520.1, H2Y34526.1, H2Y34743.1
OG0012659		OG0000032	Aeg099140.1, Aeg099150.1, Aeg099160.1, Aeg099170.1, Aeg099180.1, Aeg099200.1, Aeg099230.1, Aeg183420.1, Aeg242660.1, Aeg264930.1	Egl073790.1, Egl073810.1, Egl073840.1, Egl073930.1, Egl073950.1, Egl073980.1, Egl073990.1, Egl074020.1, Egl074030.1, Egl074040.1, Egl085170.1, Egl143420.1, Egl174790.1, Egl239470.1	Citropsis036150.1, Citropsis075130.1, Citropsis075150.1, Citropsis075180.1, Citropsis075190.1, Citropsis075200.1, Citropsis075210.1, Citropsis075220.1, Citropsis075230.1, Citropsis075260.1, Citropsis075270.1, Citropsis094660.1, Citropsis179800.1, Citropsis211770.1	CP2g000228.t1, CP2g003426.t1, CP3g000166.t1, CP4g001056.t1, CP4g001060.t1, CP4g001064.t1, CP4g001065.t1, CP4g001070.t1, CP4g001075.t1, CP4g001079.t1, CP4g001080.t1, CP4g001084.t1, CP4g001085.t1, CP4g001086.t1, CP5g005609.t1	Ciclev10000897m.1, Ciclev10007873m.1, Ciclev10007950m.1, Ciclev10007978m.1, Ciclev10007980m.1, Ciclev10007983m.1, Ciclev10008020m.1, Ciclev10008179m.1, Ciclev10008325m.1, Ciclev10008338m.1, Ciclev10010314m.1, Ciclev10010376m.1, Ciclev10010409m.1, Ciclev10010522m.1, Ciclev10010555m.1, Ciclev10010666m.1, Ciclev10010718m.1, Ciclev10014823m.1, Ciclev10014854m.1, Ciclev10019724m.1, Ciclev10020316m.1, …	Fh2g05620.1, Fh2g35590.1, Fh3g37540.1, Fh4g22160.1, Fh4g22180.1, Fh4g22190.1, Fh4g22230.1, Fh4g22240.1, Fh4g22280.1, Fh4g22320.1, Fh4g22330.1, Fh4g22400.1, Fh4g22420.1, Fh4g22430.1, Fh5g01980.1	Chh009420.1, Chh134300.1, Chh134310.1, Chh134330.1, Chh134390.1, Chh134400.1, Chh134450.1, Chh134460.1, Chh134470.1, Chh134480.1, Chh134490.1, Chh138580.1, Chh217280.1, Chh229830.1, Chh235760.1, Chh235770.1, Chh235780.1	Abu2g_001730.1, Abu2g_026030.1, Abu4g_023010.1, Abu4g_023020.1, Abu4g_023070.1, Abu4g_023090.1, Abu4g_023160.1, Abu4g_023180.1, Abu4g_023190.1, Abu4g_023200.1, Abu4g_023210.1, Abu5g_043940.1	HP042920.1, HP076500.1, HP249550.1, HP249580.1, HP249610.1, HP249620.1, HP249630.1, HP249650.1, HP249660.1, HP249670.1	Cg2g005140.1, Cg2g045080.1, Cg4g012140.1, Cg4g012160.1, Cg4g012170.1, Cg5g001970.1	Cmt057190.1, Cmt160680.1, Cmt185620.1, Cmt185830.1, Cmt201750.1, Cmt201800.1, Cmt201870.1, Cmt201880.1, Cmt201910.1, Cmt201920.1	JLX055020.1, JLX060880.1, JLX108140.1, JLX109740.1, JLX112480.1, JLX113040.1, JLX184980.1, JLX202390.1	LW020230.1, LW032600.1, LW236820.1, LW286820.1, LW286850.1, LW286870.1, LW286890.1, LW286900.1, LW286950.1, LW286960.1, LW287010.1, LW287030.1, LW287050.1, LW297310.1	Cms011450.1, Cms039890.1, Cms175940.1, Cms263860.1, Cms270020.1, Cms270030.1, Cms270040.1, Cms270050.1, Cms270070.1, Cms270100.1, Cms270110.1	Cm051560.1, Cm201230.1, Cm220410.1	Cs_ont_2g001900.1, Cs_ont_2g030560.1, Cs_ont_3g001740.1, Cs_ont_4g018680.1, Cs_ont_4g018690.1, Cs_ont_4g018700.1, Cs_ont_4g018740.1, Cs_ont_4g018750.1, Cs_ont_4g018780.1, Cs_ont_4g018800.1, Cs_ont_4g018840.1, Cs_ont_4g018850.1, Cs_ont_4g018860.1, Cs_ont_4g018870.1, Cs_ont_4g018910.1, Cs_ont_4g018930.1, Cs_ont_4g018940.1, Cs_ont_5g048780.1	SYT054220.1, SYT054230.1, SYT054240.1, SYT054250.1, SYT054260.1, SYT054280.1, SYT054300.1, SYT054320.1, SYT098480.1, SYT129270.1, SYT142090.1, SYT164730.1, SYT206750.1, SYT241140.1		Pt1g014510.1, Pt1g014520.1, Pt1g014530.1, Pt1g014540.1, Pt1g014570.1, Pt1g014580.1, Pt1g014600.1, Pt1g014620.1, Pt1g014640.1, Pt2g004690.1, Pt2g028900.1, Pt3g002500.1, Pt5g001420.1	H1Y06113.1, H1Y09969.1, H1Y10866.1, H1Y18467.1, H1Y18468.1, H1Y18469.1, H1Y18471.1, H1Y18477.1, H1Y18482.1, H1Y18491.1, H1Y18492.1, H1Y18494.1, H1Y18502.1, H1Y18505.1, H1Y18506.1, H1Y26262.1	H2Y05685.1, H2Y09487.1, H2Y10469.1, H2Y18159.1, H2Y18161.1, H2Y18162.1, H2Y18174.1, H2Y18175.1, H2Y18195.1, H2Y18196.1, H2Y26006.1
OG0012660		OG0000033	Aeg008130.1, Aeg196330.1	Egl098910.1, Egl098940.1, Egl098970.1, Egl130200.1, Egl200440.1, Egl203630.1	Citropsis127460.1, Citropsis160170.1	CP1g001015.t1, CP1g001019.t1, CP1g001101.t1, CP1g001105.t1, CP1g001119.t1, CP1g001121.t1, CP1g001980.t1, CP1g001982.t1, CP1g001985.t1, CP1g001991.t1, CP1g001993.t1, CP1g001997.t1, CP1g002000.t1, CP1g002002.t1, CP1g002005.t1, CP1g002007.t1, CP1g002008.t1, CP2g000381.t1, CP2g000846.t1, CP2g001000.t1, CP3g002667.t1, CP3g003626.t1, CP4g001093.t1, CP5g003973.t1, CP5g003974.t1, CP5g004199.t1, CP5g00420…	Ciclev10002956m.1, Ciclev10003269m.1, Ciclev10003361m.1, Ciclev10006797m.1, Ciclev10007058m.1, Ciclev10009201m.1, Ciclev10017696m.1, Ciclev10024001m.1, Ciclev10024078m.1, Ciclev10024214m.1, Ciclev10024481m.1, Ciclev10024586m.1, Ciclev10027094m.1, Ciclev10027187m.1, Ciclev10027424m.1, Ciclev10031805m.1, Ciclev10032473m.1, Ciclev10033336m.1, Ciclev10033735m.1	Fh1g13650.1, Fh1g13740.1, Fh1g13780.1, Fh1g17500.1, Fh1g20530.1, Fh1g20560.1, Fh1g20740.1, Fh2g34030.1, Fh3g16970.1, Fh4g22050.1, Fh4g22110.1, Fh5g14200.1, Fh9g15850.1, Fh9g20840.1, Fh9g20860.1, FhUn07350.1, FhUn08570.1, FhUn08580.1	Chh198840.1, Chh213450.1, Chh282480.1	Abu1g_018770.1, Abu2g_007460.1	HP050440.1, HP061320.1, HP082210.1, HP083580.1, HP108890.1, HP109030.1, HP113130.1, HP227170.1	Cg1g015500.1, Cg1g015530.1, Cg1g021540.1, Cg1g022070.1, Cg3g001850.1, Cg5g012260.1, Cg6g014070.1, Cg7g009130.1, Cg9g020860.1, Cg9g021320.1, CgUng003130.1	Cmt072410.1	JLX037150.1, JLX048810.1, JLX048850.1, JLX048930.1, JLX079630.1, JLX089410.1, JLX089500.1, JLX096860.1, JLX179750.1, JLX187380.1, JLX187420.1	LW025830.1, LW046580.1, LW046680.1, LW054720.1, LW054730.1, LW054770.1, LW054790.1, LW076980.1, LW141480.1, LW222240.1, LW309540.1, LW309560.1	Cms096460.1, Cms165200.1, Cms165240.1, Cms258320.1	Cm004040.1, Cm004680.1, Cm061880.1, Cm121370.1, Cm136370.1, Cm136380.1, Cm138410.1, Cm143910.1, Cm147140.1, Cm154160.1, Cm155020.1, Cm155040.1, Cm155060.1, Cm171370.1, Cm193120.1, Cm200920.1, Cm214610.1, Cm233370.1, Cm233950.1, Cm252460.1, Cm252480.1, Cm289220.1, Cm301810.1, Cm302600.1, Cm310340.1		SYT141480.1	Cic000190.1, Cic036570.1, Cic036590.1, Cic039310.1, Cic039340.1, Cic039370.1, Cic039410.1, Cic039440.1, Cic039460.1, Cic039470.1, Cic039480.1, Cic039490.1, Cic101650.1, Cic165300.1, Cic283340.1	Pt1g014460.1	H1Y03396.1, H1Y03413.1, H1Y06307.1, H1Y06959.1, H1Y14815.1, H1Y14818.1, H1Y14821.1, H1Y15521.1, H1Y15528.1, H1Y15530.1, H1Y18459.1, H1Y24468.1, H1Y24469.1, H1Y24714.1, H1Y24717.1, H1Y24722.1, H1Y24725.1, H1Y24734.1, H1Y24737.1, H1Y24740.1, H1Y24743.1, H1Y24746.1, H1Y24751.1, H1Y24753.1, H1Y24757.1, H1Y24770.1, H1Y31758.1, H1Y35532.1, H1Y40985.1, H1Y40995.1, H1Y41000.1, H1Y41002.1, H1Y41003.1, H1Y…	H2Y02863.1, H2Y02870.1, H2Y02877.1, H2Y02900.1, H2Y06571.1, H2Y12901.1, H2Y14318.1, H2Y14988.1, H2Y14989.1, H2Y24261.1, H2Y24476.1, H2Y24479.1, H2Y24482.1, H2Y24486.1, H2Y24490.1, H2Y24497.1, H2Y24503.1, H2Y24506.1, H2Y24510.1, H2Y24512.1, H2Y24516.1, H2Y24520.1, H2Y24537.1, H2Y31420.1, H2Y35149.1, H2Y36224.1, H2Y39908.1, H2Y41002.1
OG0012661		OG0000034	Aeg170620.1, Aeg170640.1, Aeg170650.1, Aeg170660.1, Aeg170750.1, Aeg170760.1	Egl023440.1, Egl289020.1, Egl302620.1, Egl302630.1, Egl302640.1, Egl302720.1	Citropsis152170.1, Citropsis152230.1, Citropsis157280.1, Citropsis165180.1, Citropsis165300.1	CP3g003579.t1, CP3g003580.t1, CP5g002623.t1, CP5g002625.t1, CP5g002752.t1, CP5g002820.t1, CP5g002825.t1, CP5g002826.t1, CP5g002832.t1, CP5g002839.t1, CP5g002841.t1, CP5g002845.t1, CP5g002846.t1, CP5g002852.t1, CP5g002855.t1, CP5g002860.t1, CP5g002863.t1, CP5g002865.t1, CP5g002873.t1, CP5g002878.t1, CP5g002880.t1, CP5g002881.t1, CP5g002927.t1, CP5g002940.t1, CP5g002941.t1, CP5g003021.t1	Ciclev10000401m.1, Ciclev10003293m.1, Ciclev10003578m.1, Ciclev10003731m.1, Ciclev10007011m.1, Ciclev10018550m.1, Ciclev10018572m.1, Ciclev10019116m.1, Ciclev10019117m.1, Ciclev10023421m.1, Ciclev10023438m.1, Ciclev10023455m.1, Ciclev10023505m.1, Ciclev10023653m.1, Ciclev10023686m.1, Ciclev10023891m.1, Ciclev10023905m.1, Ciclev10023938m.1, Ciclev10024129m.1, Ciclev10024297m.1, Ciclev10024379m.1, …	Fh1g12890.1, Fh1g12940.1, Fh1g13090.1, Fh3g07220.1, Fh3g07340.1, Fh3g07360.1, Fh3g07400.1, Fh5g24640.1, Fh5g25230.1, Fh5g25550.1, Fh5g25560.1, Fh5g25600.1, Fh5g25610.1, Fh5g25630.1, Fh5g25650.1, Fh5g25670.1, Fh5g25690.1, Fh5g25720.1, Fh5g25750.1, Fh5g25770.1, Fh5g25780.1, Fh5g25830.1, Fh5g25870.1, Fh5g25880.1, Fh5g25890.1, Fh5g25900.1, Fh5g25920.1, Fh5g25940.1, Fh5g25950.1, Fh5g25960.1, Fh5g25980…	Chh050780.1, Chh051000.1, Chh051060.1, Chh051080.1, Chh104350.1	Abu3g_004240.1, Abu3g_004530.1, Abu3g_004550.1, Abuscaffold_74_000010.1	HP002410.1, HP003070.1, HP003080.1, HP003100.1, HP003120.1, HP003140.1, HP003150.1, HP003180.1, HP003190.1, HP003220.1, HP003230.1, HP003250.1, HP003260.1, HP152250.1, HP152280.1, HP153740.1	Cg4g016470.1, Cg4g016600.1	Cmt107700.1		LW073520.1, LW076360.1, LW107620.1, LW141570.1, LW219520.1, LW267600.1	Cms118510.1, Cms118520.1, Cms118540.1, Cms118550.1, Cms118690.1, Cms118700.1, Cms135590.1, Cms220980.1		Cs_ont_3g028150.1, Cs_ont_3g028170.1, Cs_ont_5g023790.1, Cs_ont_5g025320.1, Cs_ont_5g025430.1, Cs_ont_5g025460.1	SYT072940.1, SYT072970.1, SYT072980.1, SYT072990.1, SYT073000.1, SYT073030.1, SYT073050.1, SYT131810.1, SYT172650.1, SYT172660.1, SYT173680.1	Cic029380.1, Cic120460.1, Cic261560.1	Pt3g019910.1	H1Y04287.1, H1Y14733.1, H1Y22722.1, H1Y22763.1, H1Y22769.1, H1Y22777.1, H1Y22779.1, H1Y22782.1, H1Y22791.1, H1Y22800.1, H1Y22812.1, H1Y22823.1, H1Y22832.1, H1Y22840.1, H1Y22846.1, H1Y22856.1, H1Y22866.1, H1Y22882.1, H1Y22911.1, H1Y22917.1, H1Y22922.1, H1Y22925.1, H1Y22933.1, H1Y22939.1, H1Y22952.1, H1Y22958.1, H1Y22965.1, H1Y22966.1, H1Y22967.1, H1Y22975.1, H1Y22978.1, H1Y22985.1, H1Y22989.1, H1Y…	H2Y03887.1, H2Y03899.1, H2Y03900.1, H2Y03910.1, H2Y03919.1, H2Y14232.1, H2Y14235.1, H2Y22563.1, H2Y22612.1, H2Y22614.1, H2Y22621.1, H2Y22625.1, H2Y22636.1, H2Y22638.1, H2Y22644.1, H2Y22655.1, H2Y22662.1, H2Y22663.1, H2Y22679.1, H2Y22683.1, H2Y22684.1, H2Y22687.1, H2Y22690.1, H2Y22702.1, H2Y22706.1, H2Y22716.1, H2Y22725.1, H2Y22729.1, H2Y22743.1, H2Y22832.1, H2Y22920.1, H2Y39230.1
OG0012662		OG0000035	Aeg076990.1, Aeg102100.1, Aeg102110.1, Aeg177250.1, Aeg271730.1, Aeg271790.1, Aeg271850.1, Aeg271860.1, Aeg272430.1, Aeg272440.1, Aeg272970.1, Aeg278260.1	Egl018790.1, Egl099610.1, Egl099620.1, Egl100510.1, Egl100520.1, Egl181720.1, Egl206080.1, Egl206240.1, Egl206290.1, Egl206680.1, Egl206710.1, Egl293540.1	Citropsis056340.1, Citropsis072070.1, Citropsis174820.1, Citropsis214660.1, Citropsis214830.1, Citropsis214960.1, Citropsis215010.1, Citropsis215580.1, Citropsis215590.1, Citropsis221930.1, Citropsis221970.1	CP1g001049.t1, CP1g001194.t1, CP1g001205.t1, CP1g001292.t1, CP1g001293.t1, CP1g001294.t1, CP1g001296.t1, CP1g001297.t1, CP1g002361.t1, CP1g002364.t1, CP1g002366.t1, CP4g000720.t1	Ciclev10008392m.1, Ciclev10025335m.1, Ciclev10025377m.1, Ciclev10025378m.1, Ciclev10025388m.1, Ciclev10025391m.1, Ciclev10025392m.1, Ciclev10025396m.1, Ciclev10025408m.1, Ciclev10025417m.1, Ciclev10031266m.1	Fh1g10290.1, Fh1g10300.1, Fh1g10330.1, Fh1g18810.1, Fh1g18860.1, Fh1g18890.1, Fh1g19690.1, Fh1g19870.1, Fh1g21470.1, Fh4g25630.1, FhUn07910.1	Chh131220.1, Chh161650.1, Chh180430.1, Chh211910.1, Chh211930.1, Chh211950.1, Chh211970.1, Chh212600.1, Chh212990.1, Chh213900.1		HP015820.1, HP015910.1, HP015950.1, HP015970.1, HP057930.1, HP057960.1, HP139640.1, HP246540.1, HP262350.1, HP284550.1, HP284830.1, HP284890.1, HP285580.1, HP285590.1, HP285980.1, HP289680.1, HP289690.1, HP289760.1	Cg1g010610.1, Cg1g010620.1, Cg1g010650.1, Cg1g021450.1, Cg1g022000.1, Cg1g024360.1, Cg2g025550.1, Cg2g025580.1, Cg2g026450.1, Cg2g026560.1, Cg4g017530.1, Cg5g007630.1, Cg5g012640.1	Cmt063720.1, Cmt198730.1, Cmt258280.1, Cmt258290.1, Cmt258310.1, Cmt263400.1, Cmt263410.1, Cmt263440.1, Cmt264710.1, Cmt264720.1, Cmt264760.1, Cmt264780.1, Cmt264790.1, Cmt264800.1, Cmt265420.1, Cmt265490.1, Cmt265500.1, Cmt265520.1, Cmt265690.1, Cmt266510.1, Cmt267840.1		LW053260.1, LW160140.1, LW160360.1, LW256890.1, LW256910.1, LW256920.1, LW256960.1, LW290040.1, LW307350.1, LW307370.1, LW307400.1, LW307440.1, LW308210.1, LW308270.1, LW308330.1, LW308370.1, LW308420.1	Cms053850.1, Cms053860.1, Cms094790.1, Cms094800.1, Cms095510.1, Cms095560.1, Cms095920.1, Cms096930.1, Cms179110.1	Cm009850.1, Cm009910.1, Cm009970.1, Cm057930.1, Cm057940.1, Cm057970.1, Cm121290.1, Cm157430.1, Cm157440.1, Cm157450.1, Cm267190.1, Cm267520.1, Cm298830.1	Cs_ont_1g008320.1, Cs_ont_1g009250.1, Cs_ont_1g009580.1, Cs_ont_1g009640.1, Cs_ont_1g009730.1, Cs_ont_1g010900.1, Cs_ont_1g010930.1, Cs_ont_1g010960.1, Cs_ont_1g010980.1, Cs_ont_1g019190.1, Cs_ont_1g019220.1, Cs_ont_4g022010.1, Cs_ont_5g042870.1	SYT013280.1, SYT013290.1, SYT041860.1, SYT041870.1, SYT104250.1, SYT106230.1, SYT116520.1, SYT220560.1	Cic072610.1, Cic121510.1, Cic176370.1, Cic176380.1, Cic176420.1, Cic176470.1, Cic177140.1, Cic177250.1, Cic177270.1, Cic199010.1, Cic199020.1	Pt1g016210.1, Pt5g025320.1, Pt7g004990.1, Pt7g005020.1, Pt7g005100.1, Pt7g005750.1, Pt7g005760.1, Pt7g005770.1, Pt7g005780.1, Pt7g012650.1, Pt7g012660.1, Pt7g012680.1	H1Y03257.1, H1Y03498.1, H1Y03502.1, H1Y03509.1, H1Y03586.1, H1Y03594.1, H1Y03602.1, H1Y04612.1, H1Y04614.1, H1Y04615.1, H1Y18900.1	H2Y02457.1, H2Y02772.1, H2Y02950.1, H2Y02954.1, H2Y03006.1, H2Y03015.1, H2Y03020.1, H2Y03033.1, H2Y03129.1, H2Y03135.1, H2Y03142.1, H2Y03149.1, H2Y03158.1, H2Y03160.1, H2Y04240.1, H2Y04244.1, H2Y04245.1, H2Y18586.1, H2Y25355.1
OG0012664		OG0000036		Egl004340.1, Egl160480.1, Egl183420.1, Egl200260.1	Citropsis214530.1, Citropsis277760.1	CP1g001416.t1, CP1g001417.t1, CP2g002434.t1, CP2g002600.t1, CP4g002489.t1, CP4g002490.t1, CP7g001611.t1, CP7g002064.t1, CP8g001630.t1, CP8g001763.t1, CP9g001647.t1		Fh1g24280.1, Fh2g03650.1, Fh2g12930.1, Fh2g12940.1, Fh2g18130.1, Fh2g23500.1, Fh3g07750.1, Fh3g08890.1, Fh3g26810.1, Fh4g09260.1, Fh5g17980.1, Fh5g24820.1, Fh5g49080.1, Fh6g06440.1, Fh6g09100.1, Fh7g03190.1, Fh7g16960.1, Fh7g17180.1, Fh7g18150.1, Fh8g19890.1, Fh8g20700.1, Fh8g24280.1, Fh8g24290.1, Fh9g13690.1, Fh9g18060.1, Fh9g22360.1, FhUn02540.1	Chh167660.1	Abu3g_004960.1	HP188510.1	Cg1g011810.1, Cg1g019960.1, Cg1g027060.1, Cg1g027800.1, Cg2g008890.1, Cg2g017870.1, Cg2g018400.1, Cg2g027530.1, Cg4g008620.1, Cg4g009120.1, Cg4g010620.1, Cg5g002400.1, Cg5g010190.1, Cg5g013160.1, Cg5g013970.1, Cg5g016020.1, Cg5g017250.1, Cg5g044240.1, Cg6g001490.1, Cg6g001760.1, Cg6g004070.1, Cg6g007530.1, Cg6g011320.1, Cg6g015600.1, Cg7g002900.1, Cg8g013050.1, Cg8g019290.1, Cg9g007770.1, Cg9g020…			LW133010.1	Cms014230.1, Cms026810.1, Cms032300.1, Cms046890.1, Cms046900.1, Cms073850.1, Cms094140.1, Cms096320.1, Cms100400.1, Cms125040.1, Cms127020.1, Cms130290.1, Cms168160.1, Cms169540.1, Cms169550.1, Cms195040.1, Cms217070.1, Cms221830.1, Cms235470.1, Cms237890.1	Cm064400.1, Cm220190.1	Cs_ont_1g008430.1, Cs_ont_1g028930.1, Cs_ont_2g009210.1, Cs_ont_2g021500.1, Cs_ont_2g026310.1, Cs_ont_2g035230.1, Cs_ont_3g021570.1, Cs_ont_3g023510.1, Cs_ont_3g026700.1, Cs_ont_3g026710.1, Cs_ont_3g028790.1, Cs_ont_4g006980.1, Cs_ont_4g007060.1, Cs_ont_4g007070.1, Cs_ont_4g010250.1, Cs_ont_4g010260.1, Cs_ont_4g011120.1, Cs_ont_4g016260.1, Cs_ont_4g017050.1, Cs_ont_4g017370.1, Cs_ont_5g016640.1, …	SYT145270.1	Cic114320.1	PtUn000600.1	H1Y00827.1, H1Y02343.1, H1Y02373.1, H1Y02673.1, H1Y03665.1, H1Y06171.1, H1Y06713.1, H1Y08807.1, H1Y08956.1, H1Y09327.1, H1Y09328.1, H1Y10611.1, H1Y11273.1, H1Y14978.1, H1Y15176.1, H1Y16646.1, H1Y16655.1, H1Y16967.1, H1Y17136.1, H1Y17290.1, H1Y17291.1, H1Y17520.1, H1Y18126.1, H1Y18254.1, H1Y18293.1, H1Y21058.1, H1Y22453.1, H1Y22519.1, H1Y23074.1, H1Y23384.1, H1Y25449.1, H1Y26369.1, H1Y27468.1, H1Y…	H2Y02510.1, H2Y02785.1, H2Y03578.1, H2Y03671.1, H2Y04303.1, H2Y05916.1, H2Y07807.1, H2Y07928.1, H2Y08743.1, H2Y08862.1, H2Y13046.1, H2Y13047.1, H2Y16521.1, H2Y16649.1, H2Y16755.1, H2Y17252.1, H2Y17303.1, H2Y17644.1, H2Y19504.1, H2Y19505.1, H2Y21583.1, H2Y23295.1, H2Y23648.1, H2Y25175.1, H2Y27666.1, H2Y28357.1, H2Y28733.1, H2Y28828.1, H2Y29070.1, H2Y29549.1, H2Y30110.1, H2Y30508.1, H2Y30996.1, H2Y…
OG0012666		OG0000037	Aeg212430.1, Aeg212440.1	Egl001980.1, Egl003560.1, Egl045240.1, Egl063790.1, Egl077920.1, Egl079440.1, Egl079450.1, Egl080560.1, Egl080570.1, Egl125230.1, Egl126240.1, Egl161640.1, Egl171770.1, Egl172090.1, Egl179010.1, Egl206170.1, Egl231590.1, Egl256850.1, Egl257670.1, Egl258270.1, Egl260320.1, Egl260330.1, Egl275360.1, Egl281460.1, Egl286850.1, Egl299430.1	Citropsis002720.1, Citropsis053900.1, Citropsis056690.1	CP1g000325.t1, CP1g000326.t1, CP1g000998.t1, CP5g002532.t1, CP5g003743.t1, CP5g005238.t1, CP6g000810.t1, CP6g002732.t1, CP8g002154.t1, CP9g001546.t1	Ciclev10029867m.1	Fh1g14790.1, Fh1g15890.1, Fh3g03560.1, Fh3g17450.1, Fh3g18380.1, Fh3g19720.1, Fh3g19730.1, Fh3g37210.1, Fh4g15980.1, Fh5g17870.1, Fh5g35880.1, Fh6g05800.1, Fh6g15460.1, Fh7g08580.1, Fh7g10490.1, Fh7g13100.1, Fh7g23130.1, Fh7g23140.1, Fh8g18510.1, Fh8g20730.1	Chh031490.1, Chh033590.1, Chh045780.1, Chh060590.1, Chh060600.1, Chh068490.1, Chh068500.1, Chh069680.1, Chh069960.1, Chh096210.1, Chh150580.1, Chh209870.1, Chh249930.1, Chh253530.1, Chh254110.1, Chh283120.1	Abu2g_024860.1, Abu3g_010840.1, Abu3g_016780.1, Abu7g_001400.1, Abu8g_009440.1	HP037200.1, HP072940.1, HP120440.1, HP120450.1, HP122720.1, HP190930.1, HP203520.1	Cg2g011820.1, Cg2g026520.1, Cg5g017990.1, Cg5g018900.1, Cg5g019560.1, Cg5g029200.1, Cg6g016090.1, Cg8g010140.1, Cg9g020760.1, CgUng018910.1, CgUng020200.1	Cmt011080.1, Cmt038110.1, Cmt047910.1, Cmt075590.1, Cmt085500.1, Cmt103160.1, Cmt104770.1, Cmt108550.1, Cmt115460.1, Cmt120140.1, Cmt142750.1, Cmt151090.1, Cmt185650.1, Cmt242830.1	JLX087990.1, JLX093820.1, JLX095520.1, JLX172880.1, JLX177600.1	LW113270.1, LW148960.1, LW150160.1, LW170230.1, LW184280.1, LW203760.1, LW222980.1, LW249690.1, LW259520.1, LW263340.1, LW305940.1, LW305960.1	Cms002760.1, Cms069730.1, Cms131060.1, Cms135840.1, Cms167900.1, Cms199540.1, Cms214650.1, Cms223650.1, Cms236980.1, Cms236990.1, Cms238220.1, Cms266440.1	Cm018050.1, Cm078720.1, Cm078730.1, Cm083330.1, Cm097310.1, Cm116750.1, Cm116760.1, Cm126940.1, Cm126950.1, Cm138210.1, Cm145850.1, Cm161340.1, Cm175300.1, Cm222310.1, Cm227300.1, Cm237820.1, Cm254040.1, Cm312480.1	Cs_ont_1g002350.1, Cs_ont_1g009680.1, Cs_ont_2g021610.1, Cs_ont_2g022350.1, Cs_ont_2g027500.1, Cs_ont_3g013370.1, Cs_ont_3g027140.1, Cs_ont_3g031420.1, Cs_ont_4g018220.1, Cs_ont_5g016670.1, Cs_ont_5g029670.1, Cs_ont_5g032030.1, Cs_ont_8g012970.1, Cs_ont_8g025480.1, Cs_ont_9g009670.1, Cs_ont_9g019910.1		Cic004570.1, Cic014450.1, Cic029490.1, Cic047250.1, Cic048900.1, Cic051260.1, Cic056360.1, Cic114950.1, Cic150470.1, Cic159620.1, Cic159630.1, Cic160140.1, Cic175340.1, Cic177210.1, Cic179830.1, Cic183120.1, Cic185710.1, Cic187540.1, Cic188660.1, Cic263450.1	Pt1g010770.1, Pt2g011770.1, Pt2g012430.1, Pt4g014430.1, Pt5g014810.1, Pt5g019040.1, Pt7g013780.1, PtUn006490.1, PtUn006610.1, PtUn011420.1, PtUn016920.1, PtUn035660.1, PtUn035860.1, PtUn036290.1	H1Y02338.1, H1Y03221.1, H1Y07657.1, H1Y08806.1, H1Y08843.1, H1Y15653.1, H1Y18408.1, H1Y22515.1, H1Y23573.1, H1Y24155.1, H1Y35326.1, H1Y37283.1, H1Y39010.1, H1Y40881.1	H2Y02122.1, H2Y02729.1, H2Y03026.1, H2Y03027.1, H2Y09098.1, H2Y11890.1, H2Y13240.1, H2Y14753.1, H2Y20710.1, H2Y21299.1, H2Y23432.1, H2Y23853.1, H2Y26174.1, H2Y27140.1, H2Y29036.1, H2Y31332.1, H2Y34864.1
OG0012667		OG0000038	Aeg005390.1, Aeg180490.1	Egl000480.1, Egl067070.1, Egl251250.1	Citropsis076120.1, Citropsis082170.1, Citropsis082200.1, Citropsis082240.1, Citropsis154540.1, Citropsis154560.1, Citropsis154810.1, Citropsis156060.1, Citropsis158330.1, Citropsis158430.1, Citropsis158480.1, Citropsis214110.1	CP1g000124.t1, CP1g000126.t1, CP1g000157.t1, CP1g000160.t1, CP1g000660.t1, CP1g000664.t1, CP1g000676.t1, CP1g000690.t1, CP1g002319.t1, CP1g002473.t1, CP3g001685.t1, CP3g001690.t1, CP3g001696.t1, CP3g001699.t1, CP3g001730.t1, CP3g001747.t1, CP3g001758.t1, CP3g003305.t1, CP3g003320.t1, CP3g003332.t1, CP3g003757.t1, CP3g003776.t1, CP3g003777.t1, CP3g003836.t1, CP3g003843.t1, CP3g003847.t1, CP4g00122…	Ciclev10004042m.1, Ciclev10027179m.1	Fh1g08920.1, Fh1g08940.1, Fh1g09220.1, Fh1g10620.1, Fh1g12120.1, Fh1g20570.1, Fh1g25360.1, Fh1g25400.1, Fh1g25430.1, Fh1g25440.1, Fh1g25490.1, Fh1g25520.1, Fh1g25590.1, Fh1g25640.1, Fh1g30490.1, Fh1g30760.1, Fh1g30780.1, Fh3g04170.1, Fh3g04180.1, Fh3g04210.1, Fh3g04250.1, Fh3g04280.1, Fh3g04300.1, Fh3g04320.1, Fh3g04340.1, Fh3g04360.1, Fh3g04420.1, Fh3g04460.1, Fh3g04470.1, Fh3g04490.1, Fh3g04520…	Chh039020.1, Chh065790.1, Chh066150.1, Chh123300.1, Chh123310.1, Chh123340.1, Chh123350.1, Chh165020.1	Abu1g_009400.1, Abu1g_009570.1, Abu1g_009580.1, Abu1g_011130.1, Abu1g_021260.1, Abu1g_021310.1, Abu1g_025560.1, Abu1g_025800.1, Abu3g_002650.1, Abu3g_002660.1, Abu3g_002670.1, Abu3g_002830.1	HP009130.1, HP140400.1	Cg1g010920.1		JLX021830.1, JLX034500.1, JLX040240.1, JLX040280.1, JLX041690.1, JLX065570.1, JLX150710.1, JLX163960.1, JLX191760.1, JLX191780.1, JLX211030.1, JLX216360.1, JLX230780.1, JLX231080.1, JLX231130.1, JLX231720.1, JLX231810.1	LW050740.1, LW071750.1, LW071760.1, LW071780.1, LW071810.1, LW075360.1, LW075460.1, LW104590.1, LW104600.1, LW104630.1, LW104640.1, LW226190.1, LW255830.1, LW257250.1		Cm219470.1	Cs_ont_1g018870.1, Cs_ont_1g020300.1	SYT068460.1, SYT070810.1, SYT070830.1, SYT070840.1, SYT070860.1, SYT070910.1, SYT070940.1, SYT071000.1, SYT193150.1, SYT252860.1			H1Y04571.1, H1Y04727.1, H1Y04728.1, H1Y04731.1	H2Y04188.1, H2Y04208.1, H2Y04360.1, H2Y04361.1
OG0012668		OG0000039	Aeg014470.1, Aeg032250.1, Aeg032260.1, Aeg032270.1, Aeg085950.1, Aeg105570.1, Aeg107790.1, Aeg151090.1, Aeg184980.1, Aeg188740.1, Aeg273040.1, Aeg277290.1, Aeg277300.1	Egl037950.1, Egl038430.1, Egl038450.1, Egl038460.1, Egl044920.1, Egl063630.1, Egl106230.1, Egl106240.1, Egl145040.1, Egl157070.1, Egl185310.1, Egl262360.1, Egl294770.1	Citropsis032570.1, Citropsis113490.1, Citropsis117410.1, Citropsis119900.1, Citropsis178190.1, Citropsis183400.1, Citropsis190360.1, Citropsis190370.1, Citropsis216210.1, Citropsis220970.1	CP1g001411.t1, CP1g002249.t1, CP1g002252.t1, CP4g000039.t1, CP4g000331.t1, CP4g003202.t1, CP5g004938.t1, CP5g005435.t1, CP6g000196.t1, CP6g002618.t1, CP6g002619.t1, CP6g002625.t1, CP6g002626.t1, CP6g002628.t1	Ciclev10007367m.1, Ciclev10007368m.1, Ciclev10007374m.1, Ciclev10007411m.1, Ciclev10011000m.1, Ciclev10011010m.1, Ciclev10011040m.1, Ciclev10013498m.1, Ciclev10018727m.1, Ciclev10018737m.1, Ciclev10024807m.1, Ciclev10024879m.1, Ciclev10027127m.1	Fh1g11370.1, Fh1g11380.1, Fh1g18010.1, Fh4g00590.1, Fh4g29670.1, Fh4g32300.1, Fh5g03600.1, Fh5g07740.1, Fh6g02620.1, Fh6g02630.1, Fh6g02640.1, Fh6g02670.1, Fh6g02710.1, Fh6g02730.1, Fh6g02740.1, Fh6g26100.1	Chh073390.1	Abu1g_011750.1, Abu1g_016460.1, Abu4g_012940.1, Abu4g_014000.1, Abu4g_016260.1, Abu5g_038360.1, Abu5g_042410.1, Abu6g_001760.1, Abu6g_020840.1, Abu6g_020860.1, Abu6g_020870.1, Abu6g_020970.1, Abu6g_020980.1	HP098770.1, HP102930.1, HP130690.1, HP134260.1, HP138550.1, HP138560.1, HP172920.1, HP180260.1, HP195170.1, HP239520.1, HP239530.1, HP240720.1, HP243000.1	Cg1g013420.1, Cg1g013430.1, Cg1g019930.1, Cg4g000530.1, Cg4g021540.1, Cg4g024660.1, Cg5g003610.1, Cg5g007770.1, Cg6g000310.1, Cg6g023820.1	Cmt058890.1, Cmt063940.1, Cmt191390.1, Cmt194050.1, Cmt217830.1, Cmt224220.1, Cmt243950.1, Cmt244000.1, Cmt244010.1, Cmt259470.1, Cmt264090.1	JLX017750.1, JLX029590.1, JLX040810.1, JLX052660.1, JLX057330.1, JLX103210.1, JLX112660.1, JLX212480.1, JLX212760.1, JLX229600.1, JLX232030.1	LW011790.1, LW018170.1, LW018200.1, LW018210.1, LW018220.1, LW061190.1, LW065200.1, LW178310.1, LW188130.1, LW218060.1, LW218070.1, LW293770.1, LW296250.1	Cms005770.1, Cms009840.1, Cms014290.1, Cms022130.1, Cms029220.1, Cms052930.1, Cms070190.1, Cms070200.1, Cms070210.1, Cms070220.1, Cms070230.1, Cms070250.1, Cms094070.1, Cms110810.1, Cms182790.1	Cm007700.1, Cm026870.1	Cs_ont_1g012060.1, Cs_ont_1g017980.1, Cs_ont_1g017990.1, Cs_ont_4g000650.1, Cs_ont_4g025810.1, Cs_ont_4g028350.1, Cs_ont_5g042730.1, Cs_ont_5g047110.1, Cs_ont_6g001870.1, Cs_ont_6g024530.1, Cs_ont_6g024550.1, Cs_ont_6g024600.1, Cs_ont_6g024620.1, Cs_ont_6g024630.1	SYT002440.1, SYT013440.1, SYT049610.1, SYT051730.1, SYT093470.1, SYT097010.1, SYT100900.1, SYT107000.1, SYT107020.1, SYT162830.1, SYT217010.1	Cic003880.1, Cic046450.1, Cic046460.1, Cic082510.1, Cic098260.1, Cic141930.1, Cic144890.1, Cic171670.1	Pt1g001700.1, Pt1g019400.1, Pt1g021640.1, Pt3g000990.1, Pt3g008760.1, Pt6g002290.1, Pt7g006330.1, Pt7g011370.1, Pt7g011380.1, PtUn013090.1, PtUn031030.1	H1Y03701.1, H1Y04488.1, H1Y04489.1, H1Y15860.1, H1Y19343.1, H1Y19637.1, H1Y25590.1, H1Y26083.1, H1Y26702.1, H1Y29557.1, H1Y29560.1, H1Y29570.1, H1Y29571.1, H1Y29574.1	H2Y03270.1, H2Y04109.1, H2Y04112.1, H2Y15278.1, H2Y19033.1, H2Y19322.1, H2Y25325.1, H2Y25831.1, H2Y26449.1, H2Y29281.1, H2Y29282.1, H2Y29295.1, H2Y29296.1, H2Y29299.1
OG0012669		OG0000040		Egl162250.1, Egl176510.1				Fh6g00490.1	Chh095320.1		HP000070.1, HP000140.1, HP000160.1, HP000190.1, HP000210.1, HP014140.1, HP014490.1, HP014670.1, HP014680.1, HP014690.1, HP014700.1, HP014720.1, HP014770.1, HP014880.1, HP015220.1, HP015250.1, HP015280.1, HP015290.1, HP015330.1, HP016000.1, HP016820.1, HP017060.1, HP035740.1, HP035940.1, HP036090.1, HP036100.1, HP036130.1, HP036230.1, HP036280.1, HP036340.1, HP036480.1, HP036750.1, HP037420.1, HP0…	CgUng000960.1				Cms127920.1, Cms240280.1	Cm109500.1	Cs_ont_7g010360.1, Cs_ont_7g010410.1		Cic001610.1, Cic001650.1, Cic050350.1	Pt5g024640.1, Pt5g024800.1	H1Y03065.1, H1Y29868.1, H1Y31456.1, H1Y31463.1	H2Y16947.1, H2Y28912.1, H2Y29694.1, H2Y31111.1, H2Y31147.1
OG0012670		OG0000041	Aeg020680.1, Aeg020720.1, Aeg029970.1, Aeg030270.1, Aeg030400.1, Aeg054500.1, Aeg065440.1, Aeg156220.1	Egl032610.1, Egl056690.1, Egl075440.1, Egl112170.1, Egl133370.1, Egl159660.1, Egl160870.1, Egl165690.1, Egl180120.1, Egl266590.1, Egl266630.1, Egl268040.1, Egl272900.1, Egl277010.1, Egl285340.1	Citropsis012780.1, Citropsis084640.1, Citropsis107550.1, Citropsis142170.1, Citropsis163400.1, Citropsis163430.1, Citropsis163750.1, Citropsis163950.1, Citropsis247830.1	CP5g000649.t1, CP5g003551.t1, CP6g002013.t1, CP6g002124.t1, CP6g002125.t1, CP6g002130.t1, CP6g002174.t1, CP6g002200.t1, CP7g000565.t1, CP8g002775.t1, CP9g002872.t1	Ciclev10006130m.1, Ciclev10006134m.1, Ciclev10012290m.1, Ciclev10012291m.1, Ciclev10012292m.1, Ciclev10012652m.1, Ciclev10012654m.1, Ciclev10013001m.1, Ciclev10013083m.1, Ciclev10013105m.1, Ciclev10013111m.1, Ciclev10022855m.1, Ciclev10023128m.1, Ciclev10023132m.1, Ciclev10024476m.1, Ciclev10029476m.1, Ciclev10032969m.1	Fh3g01740.1, Fh3g02170.1, Fh5g19950.1, Fh5g43460.1, Fh6g07230.1, Fh6g07500.1, Fh6g07960.1, Fh6g08020.1, Fh6g08030.1, Fh7g27860.1, Fh8g24690.1, Fh9g26340.1	Chh031560.1, Chh043100.1, Chh114370.1, Chh122340.1, Chh122520.1, Chh122880.1, Chh122930.1, Chh122940.1, Chh129840.1, Chh190150.1, Chh257140.1, Chh267980.1, Chh280140.1	Abu4g_018330.1, Abu5g_006260.1, Abu5g_026870.1, Abu6g_008220.1, Abu6g_017940.1, Abu6g_017990.1, Abu6g_018020.1, Abu6g_018370.1, Abu6g_018510.1, Abu7g_021740.1, Abu9g_021090.1	HP067560.1, HP112840.1, HP147350.1, HP155690.1, HP155870.1, HP156370.1, HP156410.1, HP157020.1, HP166370.1, HP214130.1, HP234520.1	Cg1g005550.1, Cg3g020690.1, Cg4g005360.1, Cg5g018530.1, Cg5g039020.1, Cg6g001920.1, Cg6g002270.1, Cg6g002300.1, Cg6g002310.1, Cg7g019060.1, Cg8g019530.1, CgUng003050.1		JLX003680.1	LW014450.1, LW014460.1, LW014490.1, LW014860.1, LW015060.1, LW024450.1, LW088480.1, LW125280.1, LW246210.1, LW247840.1, LW258360.1	Cms044380.1, Cms138020.1, Cms163110.1, Cms175540.1, Cms180650.1, Cms185410.1, Cms198330.1, Cms216600.1, Cms216630.1, Cms218830.1, Cms218990.1, Cms229970.1	Cm006300.1, Cm006340.1, Cm011330.1, Cm011350.1, Cm033170.1, Cm033810.1, Cm048960.1, Cm062690.1, Cm075520.1, Cm082400.1, Cm082570.1, Cm086860.1, Cm117150.1, Cm141140.1	Cs_ont_1g008940.1, Cs_ont_1g024760.1, Cs_ont_3g005790.1, Cs_ont_3g032040.1, Cs_ont_4g023550.1, Cs_ont_5g006360.1, Cs_ont_5g030620.1, Cs_ont_6g018960.1, Cs_ont_6g019950.1, Cs_ont_6g019960.1, Cs_ont_6g020010.1, Cs_ont_6g020380.1, Cs_ont_6g020650.1, Cs_ont_7g024280.1, Cs_ont_8g005810.1, Cs_ont_9g026330.1	SYT034020.1, SYT058350.1, SYT067120.1, SYT067280.1, SYT067550.1, SYT067580.1, SYT146330.1, SYT247140.1	Cic094050.1, Cic101860.1, Cic141920.1, Cic162700.1	Pt3g016740.1, Pt3g035300.1, Pt4g006840.1, Pt5g022730.1, Pt6g007690.1, Pt6g017060.1, Pt6g017070.1, Pt6g017910.1, Pt6g018060.1, Pt6g019020.1, Pt9g019400.1, PtUn031300.1	H1Y03012.1, H1Y14401.1, H1Y18287.1, H1Y18288.1, H1Y19090.1, H1Y20426.1, H1Y23822.1, H1Y27437.1, H1Y28714.1, H1Y28854.1, H1Y28856.1, H1Y28861.1, H1Y28867.1, H1Y28868.1, H1Y28914.1, H1Y28953.1, H1Y33333.1, H1Y34575.1, H1Y41807.1	H2Y04865.1, H2Y05586.1, H2Y08395.1, H2Y10918.1, H2Y14948.1, H2Y18763.1, H2Y20124.1, H2Y23615.1, H2Y27261.1, H2Y28504.1, H2Y28505.1, H2Y28636.1, H2Y28637.1, H2Y28648.1, H2Y28653.1, H2Y28654.1, H2Y28704.1, H2Y28742.1, H2Y32925.1, H2Y34133.1, H2Y41766.1
OG0012672		OG0000042			Citropsis084040.1, Citropsis084050.1, Citropsis084070.1, Citropsis084080.1, Citropsis084090.1, Citropsis090600.1, Citropsis090770.1, Citropsis090780.1, Citropsis090790.1, Citropsis090810.1, Citropsis090830.1, Citropsis090860.1, Citropsis090870.1, Citropsis090880.1, Citropsis090890.1, Citropsis090900.1, Citropsis090920.1, Citropsis090940.1, Citropsis090960.1, Citropsis091000.1, Citropsis091020.1, …	CP9g001559.t1, CP9g001981.t1, CP9g001982.t1, CP9g001992.t1, CP9g001999.t1, CP9g002000.t1, CP9g002004.t1	Ciclev10004251m.1, Ciclev10004252m.1, Ciclev10004253m.1, Ciclev10004374m.1, Ciclev10005980m.1, Ciclev10006412m.1, Ciclev10006453m.1, Ciclev10006496m.1, Ciclev10006573m.1, Ciclev10006774m.1, Ciclev10006793m.1, Ciclev10006889m.1, Ciclev10006997m.1, Ciclev10007014m.1, Ciclev10007021m.1, Ciclev10007027m.1, Ciclev10007102m.1, Ciclev10007116m.1, Ciclev10027645m.1	Fh2g08500.1, Fh9g14040.1, Fh9g14090.1, Fh9g15500.1, Fh9g15520.1, Fh9g19110.1, Fh9g19120.1, Fh9g19140.1, Fh9g19180.1, Fh9g19220.1, Fh9g19240.1, Fh9g19250.1, Fh9g19270.1, Fh9g19300.1, Fh9g19320.1, Fh9g19330.1, Fh9g19370.1, Fh9g19520.1, Fh9g19530.1, Fh9g19550.1, Fh9g19560.1, Fh9g26760.1, Fh9g26770.1, Fh9g26940.1, Fh9g27010.1, Fh9g27020.1, Fh9g27030.1, Fh9g27040.1, Fh9g27070.1		Abu4g_004930.1, Abu4g_004940.1, Abu9g_012440.1, Abu9g_012480.1, Abu9g_014930.1, Abu9g_014950.1, Abu9g_014990.1, Abu9g_015020.1, Abu9g_015030.1, Abu9g_015690.1, Abu9g_021730.1, Abu9g_021740.1, Abu9g_021760.1	HP045610.1, HP064230.1, HP068140.1, HP068160.1, HP250750.1, HP250770.1, HP280970.1, HP280980.1, HP280990.1, HP281000.1	Cg2g008010.1, Cg6g014330.1, Cg6g014370.1, Cg6g014380.1, Cg6g014390.1, Cg6g014400.1, Cg9g012950.1, Cg9g012970.1, Cg9g012990.1, Cg9g015660.1, Cg9g015690.1, Cg9g018670.1, Cg9g018690.1, Cg9g018720.1, Cg9g018730.1, Cg9g018760.1, Cg9g018790.1, Cg9g019740.1, Cg9g019840.1, Cg9g019880.1, Cg9g019900.1, Cg9g019910.1, Cg9g019920.1, Cg9g019930.1, Cg9g019960.1, Cg9g019990.1, Cg9g020000.1, Cg9g027760.1, Cg9g027…		JLX019640.1, JLX021140.1, JLX021310.1, JLX023760.1, JLX024370.1, JLX024590.1, JLX081920.1, JLX094380.1, JLX094810.1	LW047890.1, LW047920.1, LW047930.1, LW048080.1, LW048100.1, LW048270.1, LW048280.1, LW048340.1, LW048400.1, LW048410.1, LW048430.1, LW204580.1, LW233810.1				SYT006460.1, SYT069820.1, SYT132690.1, SYT132700.1, SYT132710.1, SYT132790.1, SYT201880.1	Cic068460.1, Cic118120.1, Cic118130.1, Cic118140.1, Cic118150.1, Cic118320.1, Cic118330.1, Cic118410.1, Cic118420.1, Cic118430.1, Cic118440.1, Cic118450.1, Cic118460.1, Cic118500.1, Cic118510.1, Cic118530.1, Cic163120.1, Cic163270.1, Cic163280.1, Cic163300.1, Cic189650.1		H1Y01477.1, H1Y39809.1, H1Y39830.1, H1Y40689.1, H1Y40692.1, H1Y40696.1, H1Y40697.1, H1Y40705.1, H1Y40711.1, H1Y40712.1, H1Y40714.1, H1Y40718.1, H1Y40723.1, H1Y40727.1, H1Y40735.1, H1Y40754.1, H1Y40758.1, H1Y40759.1, H1Y40763.1, H1Y40764.1, H1Y41850.1, H1Y41872.1, H1Y41874.1, H1Y41878.1, H1Y41881.1, H1Y41884.1	H2Y39728.1, H2Y39735.1, H2Y40712.1, H2Y40715.1, H2Y40719.1, H2Y40720.1, H2Y40731.1, H2Y40732.1, H2Y40734.1, H2Y40738.1, H2Y40739.1, H2Y40741.1, H2Y40745.1, H2Y40752.1, H2Y40755.1, H2Y40764.1, H2Y40767.1, H2Y40768.1, H2Y40772.1, H2Y40804.1, H2Y40805.1, H2Y41814.1, H2Y41834.1, H2Y41839.1, H2Y41841.1
OG0012673		OG0000043	Aeg143200.1	Egl036790.1, Egl036810.1, Egl036970.1, Egl036980.1, Egl096750.1, Egl096760.1, Egl229670.1, Egl242980.1, Egl243050.1	Citropsis016300.1, Citropsis048810.1, Citropsis048870.1, Citropsis092430.1, Citropsis092440.1, Citropsis092460.1, Citropsis092470.1, Citropsis092520.1, Citropsis092530.1, Citropsis092630.1, Citropsis092720.1, Citropsis092730.1, Citropsis161920.1, Citropsis162000.1, Citropsis203890.1, Citropsis240590.1, Citropsis240600.1, Citropsis240610.1, Citropsis240630.1, Citropsis240690.1, Citropsis240820.1, …	CP3g001396.t1, CP3g001397.t1, CP3g001981.t1, CP3g001987.t1, CP3g002004.t1, CP3g002708.t1, CP3g002709.t1, CP3g002710.t1, CP3g002711.t1, CP3g002723.t1, CP3g002778.t1, CP9g001382.t1	Ciclev10001370m.1, Ciclev10001374m.1, Ciclev10001388m.1, Ciclev10001393m.1, Ciclev10001412m.1, Ciclev10001414m.1, Ciclev10001420m.1, Ciclev10001422m.1, Ciclev10001425m.1, Ciclev10001430m.1, Ciclev10001445m.1, Ciclev10001629m.1, Ciclev10003867m.1, Ciclev10003925m.1, Ciclev10006945m.1, Ciclev10013989m.1	Fh3g14090.1, Fh3g14100.1, Fh3g14140.1, Fh3g14150.1, Fh3g20630.1, Fh3g20700.1, Fh3g20710.1, Fh3g26060.1, Fh9g12840.1	Chh056170.1, Chh056260.1, Chh056300.1, Chh056330.1, Chh080770.1, Chh080780.1, Chh123640.1, Chh123650.1, Chh123730.1, Chh123780.1, Chh136070.1, Chh196310.1, Chh196320.1, Chh196330.1, Chh196360.1, Chh196380.1	Abu3g_007150.1, Abu3g_007190.1, Abu3g_007200.1, Abu3g_007210.1, Abu3g_007250.1, Abu3g_007260.1, Abu3g_010500.1, Abu3g_010510.1, Abu3g_010520.1, Abu3g_010550.1, Abu3g_010580.1, Abu3g_013930.1, Abu3g_013940.1, Abu9g_011470.1	HP019720.1, HP019740.1, HP019750.1, HP019760.1, HP019770.1, HP019780.1, HP032200.1, HP032210.1, HP070500.1, HP149570.1, HP263420.1	Cg2g033130.1, Cg2g033140.1, Cg3g003000.1, Cg3g004890.1, Cg3g004900.1, Cg3g004910.1, Cg3g004920.1, Cg3g012080.1, Cg3g012140.1, Cg9g011710.1		JLX041460.1, JLX041630.1, JLX041730.1, JLX042220.1, JLX042230.1, JLX042280.1, JLX083650.1, JLX083850.1, JLX084100.1, JLX084120.1, JLX084570.1, JLX084770.1, JLX084850.1, JLX085020.1, JLX093420.1, JLX125970.1, JLX132740.1, JLX133020.1, JLX133260.1, JLX164960.1, JLX165280.1, JLX183210.1, JLX183220.1, JLX183240.1	LW070260.1, LW100860.1, LW100870.1, LW100880.1, LW100890.1, LW100920.1, LW100950.1, LW137740.1, LW137750.1, LW315070.1			Cs_ont_3g013600.1, Cs_ont_3g013610.1, Cs_ont_3g017940.1, Cs_ont_3g018010.1, Cs_ont_3g018080.1, Cs_ont_3g022900.1, Cs_ont_3g022910.1, Cs_ont_3g022920.1, Cs_ont_3g022930.1, Cs_ont_3g022950.1, Cs_ont_3g022970.1, Cs_ont_3g023080.1, Cs_ont_3g023130.1, Cs_ont_3g033490.1, Cs_ont_9g012750.1	SYT001910.1, SYT004450.1, SYT048060.1, SYT145560.1, SYT191170.1, SYT191180.1, SYT211250.1, SYT211260.1, SYT211270.1, SYT211280.1, SYT211660.1, SYT211670.1, SYT225730.1	Cic012920.1, Cic013100.1, Cic013110.1, Cic013130.1, Cic212750.1, Cic212760.1, Cic216040.1, Cic216050.1, Cic216130.1, Cic216180.1, Cic241090.1	Pt5g012050.1, Pt5g012060.1, Pt5g015810.1, Pt5g015950.1, Pt5g015990.1, Pt9g010690.1, PtUn009800.1, PtUn012210.1, PtUn012220.1, PtUn012250.1, PtUn012260.1, PtUn012270.1, PtUn023900.1, PtUn025240.1, PtUn029980.1, PtUn030040.1, PtUn030660.1, PtUn035010.1	H1Y12173.1, H1Y12175.1, H1Y12842.1, H1Y12852.1, H1Y12873.1, H1Y13707.1, H1Y13711.1, H1Y13715.1, H1Y13717.1, H1Y39568.1	H2Y11900.1, H2Y11902.1, H2Y12447.1, H2Y12450.1, H2Y12468.1, H2Y13276.1, H2Y13278.1, H2Y13279.1, H2Y13285.1, H2Y13286.1, H2Y39507.1
OG0012674		OG0000044	Aeg031110.1, Aeg031120.1, Aeg214550.1, Aeg214560.1, Aeg214570.1, Aeg214580.1, Aeg214590.1, Aeg274680.1	Egl003700.1, Egl003750.1, Egl003770.1, Egl003800.1, Egl003830.1, Egl003840.1, Egl256650.1, Egl257970.1, Egl257980.1, Egl277110.1	Citropsis125680.1, Citropsis125720.1, Citropsis125730.1, Citropsis125750.1, Citropsis125760.1, Citropsis125770.1, Citropsis125780.1, Citropsis188690.1, Citropsis188710.1, Citropsis218070.1	CP1g001815.t1, CP3g002850.t1, CP6g002376.t1, CP6g002378.t1, CP6g002379.t1, CP6g002381.t1, CP8g001635.t1, CP8g001636.t1, CP8g001637.t1, CP8g001638.t1, CP8g001639.t1, CP8g001641.t1, CP8g001644.t1	Ciclev10003977m.1, Ciclev10010868m.1, Ciclev10010870m.1, Ciclev10011555m.1, Ciclev10011889m.1, Ciclev10012368m.1, Ciclev10013516m.1, Ciclev10013869m.1, Ciclev10027181m.1, Ciclev10027236m.1, Ciclev10027579m.1, Ciclev10028248m.1, Ciclev10028274m.1, Ciclev10028297m.1, Ciclev10028312m.1, Ciclev10028315m.1, Ciclev10028465m.1, Ciclev10030204m.1	Fh1g15000.1, Fh6g01180.1, Fh6g04620.1, Fh6g04630.1, Fh6g04670.1, Fh8g13740.1, Fh8g13760.1, Fh8g13780.1, Fh8g13810.1, Fh8g13850.1, Fh8g13860.1, Fh8g13870.1, FhUn09390.1, FhUn09400.1	Chh096480.1, Chh096490.1, Chh102150.1, Chh102170.1, Chh102180.1, Chh102220.1, Chh108120.1, Chh252860.1, Chh259160.1, Chh259170.1, Chh259180.1, Chh259190.1, Chh259210.1, Chh259220.1, Chh259240.1		HP018550.1, HP132620.1, HP132630.1, HP135130.1, HP188430.1, HP191430.1, HP191460.1, HP191490.1, HP191530.1, HP191560.1, HP191580.1	Cg1g017210.1, Cg1g017230.1, Cg1g019750.1, Cg1g019770.1, Cg1g019780.1, Cg1g019810.1, Cg2g012100.1, Cg2g012120.1, Cg2g012130.1, Cg2g012140.1, Cg3g003190.1, CgUng004770.1, CgUng004780.1, CgUng004790.1	Cmt040250.1, Cmt040270.1, Cmt040280.1, Cmt040290.1, Cmt040300.1, Cmt040320.1, Cmt111870.1, Cmt111890.1, Cmt242600.1, Cmt242610.1, Cmt242620.1, Cmt261940.1, Cmt262200.1, Cmt262220.1	JLX067380.1, JLX067390.1, JLX119730.1, JLX119760.1, JLX120240.1, JLX120910.1, JLX121600.1, JLX121610.1, JLX208080.1, JLX209020.1	LW016290.1, LW016310.1, LW016320.1, LW100330.1, LW181270.1, LW278250.1, LW278270.1, LW278320.1, LW278350.1, LW278370.1, LW278380.1, LW278390.1, LW278400.1	Cms281160.1	Cm118150.1	Cs_ont_3g023610.1, Cs_ont_3g023640.1, Cs_ont_3g023660.1, Cs_ont_6g022460.1, Cs_ont_8g015970.1, Cs_ont_8g015990.1, Cs_ont_8g016030.1	SYT004730.1, SYT004740.1, SYT004750.1, SYT004760.1, SYT004770.1, SYT014860.1, SYT049150.1, SYT102060.1, SYT102070.1, SYT146170.1, SYT146180.1, SYT149290.1, SYT200810.1	Cic012620.1, Cic113990.1, Cic114020.1, Cic114050.1, Cic114070.1, Cic114080.1, Cic114090.1, Cic114100.1, Cic143230.1, Cic143250.1, Cic143260.1, Cic143280.1, Cic173610.1, Cic173620.1	Pt6g018900.1, Pt6g018910.1, Pt6g018920.1, PtUn010060.1, PtUn010790.1, PtUn010800.1, PtUn010810.1, PtUn010820.1, PtUn010830.1, PtUn010840.1, PtUn018770.1, PtUn018800.1, PtUn030780.1, PtUn030790.1, PtUn033420.1, PtUn033430.1, PtUn033440.1	H1Y04005.1, H1Y04006.1, H1Y29246.1, H1Y29252.1, H1Y29253.1, H1Y29255.1, H1Y35952.1, H1Y35957.1, H1Y35960.1, H1Y35965.1, H1Y35967.1, H1Y35969.1, H1Y35971.1	H2Y03595.1, H2Y03596.1, H2Y03599.1, H2Y13395.1, H2Y13400.1, H2Y28980.1, H2Y28985.1, H2Y28987.1, H2Y28989.1, H2Y35749.1, H2Y35752.1, H2Y35755.1, H2Y35763.1, H2Y35768.1, H2Y35772.1, H2Y35778.1, H2Y37165.1
OG0012675		OG0000045	Aeg232310.1, Aeg232320.1, Aeg232330.1, Aeg232340.1, Aeg232350.1, Aeg232380.1	Egl228120.1	Citropsis066690.1, Citropsis236300.1	CP9g001153.t1, CP9g001155.t1, CP9g001156.t1, CP9g001159.t1, CP9g001163.t1, CP9g001164.t1, CP9g001166.t1, CP9g001171.t1, CP9g001173.t1, CP9g001174.t1, CP9g001180.t1, CP9g001182.t1	Ciclev10005829m.1, Ciclev10005833m.1, Ciclev10005835m.1, Ciclev10005837m.1, Ciclev10005840m.1, Ciclev10005841m.1, Ciclev10005843m.1, Ciclev10005850m.1, Ciclev10005851m.1, Ciclev10006404m.1, Ciclev10006426m.1, Ciclev10006495m.1, Ciclev10006532m.1, Ciclev10006556m.1, Ciclev10006765m.1, Ciclev10006776m.1, Ciclev10006839m.1, Ciclev10006863m.1, Ciclev10006901m.1, Ciclev10006915m.1, Ciclev10006959m.1, …	Fh6g04420.1, Fh6g07020.1, Fh9g10750.1, Fh9g10840.1, Fh9g10850.1, Fh9g10860.1, Fh9g10870.1, Fh9g10890.1, Fh9g10930.1, Fh9g10940.1, Fh9g10950.1, Fh9g10960.1, Fh9g10980.1, Fh9g11060.1	Chh057230.1, Chh084620.1, Chh084640.1, Chh084670.1, Chh084690.1, Chh084730.1, Chh084750.1, Chh084760.1, Chh084770.1, Chh084780.1, Chh084800.1, Chh084810.1, Chh084820.1, Chh084830.1, Chh084840.1, Chh084900.1, Chh253010.1, Chh284950.1, Chh284960.1, Chh284980.1	Abu9g_010870.1	HP012850.1, HP262390.1, HP262400.1, HP262410.1		Cmt148130.1, Cmt148140.1, Cmt148160.1, Cmt148170.1, Cmt148210.1, Cmt148230.1, Cmt148270.1, Cmt148280.1, Cmt148290.1, Cmt148300.1	JLX165320.1, JLX165380.1, JLX165550.1, JLX165780.1, JLX165790.1, JLX166000.1, JLX182910.1	LW266870.1, LW266890.1, LW266900.1, LW266910.1, LW266920.1, LW266950.1, LW266960.1, LW266980.1, LW266990.1, LW267000.1, LW267020.1, LW267040.1, LW267050.1, LW267120.1, LW267140.1, LW267240.1	Cms153290.1, Cms153350.1, Cms153380.1, Cms153390.1, Cms153430.1, Cms153450.1, Cms153460.1, Cms153480.1, Cms153490.1, Cms153520.1, Cms153530.1	Cm005440.1, Cm005470.1, Cm005480.1, Cm005490.1, Cm005520.1, Cm005530.1, Cm005560.1, Cm005570.1, Cm005590.1, Cm005640.1, Cm125350.1, Cm125360.1, Cm125380.1, Cm125440.1, Cm171440.1, Cm174780.1	Cs_ont_9g010720.1, Cs_ont_9g010760.1, Cs_ont_9g010770.1, Cs_ont_9g010790.1, Cs_ont_9g010800.1, Cs_ont_9g010810.1, Cs_ont_9g010830.1, Cs_ont_9g010840.1, Cs_ont_9g010850.1, Cs_ont_9g010860.1, Cs_ont_9g010880.1, Cs_ont_9g010910.1, Cs_ont_9g010930.1, Cs_ont_9g010970.1, Cs_ont_9g010990.1, Cs_ont_9g011050.1, Cs_ont_9g011140.1	SYT081810.1, SYT081820.1, SYT081880.1, SYT081890.1, SYT081910.1, SYT204620.1, SYT204640.1, SYT204650.1, SYT220120.1, SYT220130.1	Cic224230.1, Cic242620.1, Cic242640.1, Cic242650.1, Cic242660.1, Cic242700.1, Cic242710.1, Cic242730.1, Cic242740.1, Cic242750.1	Pt7g005300.1, Pt9g009550.1, Pt9g009570.1, Pt9g009580.1, Pt9g009620.1, Pt9g009630.1, Pt9g009650.1, Pt9g009690.1, Pt9g009750.1, Pt9g009770.1, Pt9g009840.1	H1Y39156.1, H1Y39164.1, H1Y39165.1, H1Y39168.1, H1Y39169.1, H1Y39170.1, H1Y39172.1, H1Y39173.1, H1Y39174.1, H1Y39175.1, H1Y39177.1, H1Y39180.1, H1Y39182.1, H1Y39186.1, H1Y39187.1, H1Y39191.1, H1Y39201.1, H1Y39215.1	H2Y39048.1, H2Y39056.1, H2Y39057.1, H2Y39061.1, H2Y39062.1, H2Y39063.1, H2Y39065.1, H2Y39066.1, H2Y39067.1, H2Y39068.1, H2Y39070.1, H2Y39073.1, H2Y39075.1, H2Y39076.1, H2Y39077.1, H2Y39079.1, H2Y39082.1, H2Y39088.1, H2Y39092.1, H2Y39093.1, H2Y39096.1, H2Y39110.1
OG0012676		OG0000046	Aeg097440.1	Egl001010.1, Egl001040.1, Egl001120.1, Egl001160.1, Egl001180.1, Egl001200.1, Egl133430.1, Egl172680.1	Citropsis212900.1, Citropsis212910.1, Citropsis212920.1, Citropsis212940.1, Citropsis212950.1, Citropsis212970.1, Citropsis212980.1, Citropsis212990.1, Citropsis213010.1, Citropsis213020.1, Citropsis213050.1, Citropsis238760.1, Citropsis239320.1	CP4g001274.t1, CP4g001444.t1, CP4g001446.t1, CP4g001449.t1, CP4g001451.t1, CP4g001457.t1, CP4g001459.t1, CP4g001461.t1, CP4g001462.t1, CP4g001465.t1, CP4g001468.t1, CP4g001471.t1, CP4g001474.t1, CP4g001475.t1, CP4g001477.t1, CP4g001483.t1, CP4g001486.t1, CP4g001876.t1, CP4g001877.t1, CP6g002455.t1	Ciclev10007426m.1, Ciclev10007443m.1, Ciclev10007452m.1, Ciclev10007453m.1, Ciclev10007454m.1, Ciclev10007463m.1, Ciclev10007468m.1, Ciclev10007471m.1, Ciclev10007475m.1, Ciclev10007476m.1, Ciclev10007509m.1, Ciclev10007525m.1, Ciclev10007649m.1, Ciclev10007661m.1, Ciclev10007667m.1, Ciclev10007681m.1, Ciclev10007685m.1, Ciclev10007766m.1, Ciclev10007779m.1, Ciclev10007780m.1, Ciclev10008016m.1, …	Fh4g14490.1, Fh4g18580.1, Fh4g18600.1, Fh4g18680.1, Fh4g18690.1, Fh4g18720.1, Fh4g18730.1, Fh4g18750.1, Fh4g18780.1, Fh4g18800.1, Fh4g18830.1, Fh4g18840.1, Fh4g18870.1, Fh4g18880.1, Fh4g18890.1, Fh4g18910.1, Fh4g18920.1, Fh4g18950.1, Fh4g18980.1, Fh4g19000.1, Fh4g19010.1, Fh4g19020.1, Fh4g20750.1, Fh6g04130.1	Chh043050.1, Chh185240.1	Abu4g_000240.1, Abu4g_000260.1, Abu4g_000780.1, Abu4g_000810.1	HP051860.1, HP055250.1, HP055260.1, HP055270.1, HP055290.1, HP109920.1	Cg2g022160.1, Cg2g022180.1, Cg2g022210.1, Cg2g022230.1, Cg2g022240.1, Cg2g022270.1, Cg2g022280.1, Cg2g022290.1, Cg2g022330.1, Cg2g022340.1, Cg2g022360.1, Cg2g022370.1, Cg2g022380.1, Cg2g022400.1, Cg2g022430.1, Cg2g023720.1, Cg4g011160.1	Cmt203880.1, Cmt203930.1, Cmt206540.1	JLX108040.1, JLX108610.1, JLX109120.1, JLX112210.1, JLX113970.1, JLX115250.1, JLX115680.1, JLX118360.1, JLX118640.1	LW269090.1, LW269120.1	Cms185570.1, Cms185580.1	Cm022450.1, Cm022460.1, Cm022490.1, Cm022500.1, Cm022510.1, Cm022540.1, Cm022550.1, Cm022560.1, Cm022620.1, Cm022640.1, Cm022700.1, Cm022720.1, Cm022750.1, Cm113160.1, Cm305010.1	Cs_ont_4g016140.1, Cs_ont_4g016150.1	SYT102870.1, SYT120080.1, SYT120120.1, SYT142250.1, SYT172800.1, SYT172810.1, SYT172830.1, SYT172930.1, SYT172940.1, SYT215710.1, SYT215730.1, SYT215740.1, SYT215750.1, SYT215760.1, SYT215770.1, SYT215780.1, SYT215790.1, SYT215800.1, SYT215810.1, SYT215820.1, SYT215840.1, SYT215850.1, SYT215860.1, SYT227620.1	Cic076920.1, Cic078030.1, Cic078050.1, Cic078070.1, Cic078090.1, Cic273340.1, Cic273450.1	Pt1g013450.1, PtUn025710.1, PtUn025730.1	H1Y17586.1, H1Y18054.1, H1Y18060.1, H1Y18063.1, H1Y18072.1, H1Y18073.1, H1Y18075.1, H1Y18078.1, H1Y18081.1, H1Y18083.1, H1Y18086.1, H1Y18090.1, H1Y18099.1, H1Y18102.1, H1Y18107.1, H1Y18108.1, H1Y18297.1, H1Y29349.1	H2Y00505.1, H2Y00506.1, H2Y17112.1, H2Y17651.1, H2Y17665.1, H2Y17666.1, H2Y17670.1, H2Y17673.1, H2Y17675.1, H2Y17678.1, H2Y17682.1, H2Y17685.1, H2Y17688.1, H2Y17690.1, H2Y17694.1, H2Y17699.1, H2Y17702.1, H2Y17703.1, H2Y17708.1, H2Y17958.1
OG0012677		OG0000047	Aeg137310.1, Aeg137810.1, Aeg140480.1, Aeg140490.1, Aeg140500.1, Aeg140510.1, Aeg157170.1, Aeg224700.1, Aeg225540.1	Egl057800.1, Egl183040.1, Egl183050.1, Egl183060.1, Egl183070.1, Egl183110.1, Egl192470.1, Egl200670.1, Egl211580.1, Egl212160.1, Egl217920.1, Egl254690.1	Citropsis065320.1, Citropsis149150.1, Citropsis149180.1, Citropsis149200.1, Citropsis149210.1, Citropsis149230.1, Citropsis149300.1, Citropsis149310.1, Citropsis149330.1, Citropsis161190.1, Citropsis161240.1, Citropsis161270.1, Citropsis161280.1, Citropsis161290.1, Citropsis161300.1, Citropsis161330.1, Citropsis161350.1, Citropsis161390.1, Citropsis163110.1, Citropsis232270.1, Citropsis233240.1, …	CP3g001449.t1, CP3g001521.t1, CP3g002090.t1, CP3g002096.t1, CP5g000763.t1, CP9g000103.t1, CP9g000201.t1	Ciclev10004067m.1, Ciclev10024656m.1	Fh3g19780.1, Fh3g19860.1, Fh3g25050.1, Fh3g25660.1, Fh5g42440.1, Fh9g00950.1, Fh9g01790.1, FhUn01760.1, FhUn01780.1	Chh029720.1, Chh029740.1, Chh029760.1, Chh030070.1, Chh055610.1, Chh081150.1, Chh100960.1, Chh115430.1, Chh146300.1, Chh146350.1, Chh146380.1, Chh146420.1, Chh153420.1, Chh153460.1, Chh153540.1, Chh181760.1, Chh182610.1	Abu3g_010030.1, Abu3g_010040.1, Abu3g_010050.1, Abu3g_010060.1, Abu3g_010070.1, Abu3g_012960.1, Abu3g_013540.1, Abu5g_007290.1, Abu9g_001420.1, Abu9g_002260.1	HP032610.1, HP033080.1, HP036900.1, HP071140.1, HP071160.1, HP071180.1, HP071190.1, HP071200.1, HP071210.1, HP071270.1, HP071280.1, HP071320.1, HP233460.1, HP253800.1, HP254650.1	Cg2g032160.1, Cg2g032730.1, Cg3g011320.1, Cg3g011430.1, Cg3g011490.1, Cg3g011530.1, Cg3g011560.1, Cg3g011570.1, Cg5g037980.1, Cg9g000910.1, Cg9g001690.1	Cmt119140.1, Cmt157070.1	JLX073500.1, JLX125100.1, JLX125770.1, JLX126480.1, JLX127540.1, JLX128930.1, JLX130050.1, JLX134730.1, JLX205210.1, JLX214670.1, JLX215860.1	LW124220.1, LW138170.1, LW153920.1	Cms075160.1	Cm047570.1, Cm113620.1, Cm114120.1, Cm194780.1, Cm197140.1, Cm228360.1, Cm228390.1, Cm228400.1, Cm242210.1, Cm242210.2.1, Cm251090.1, Cm251120.1, Cm255750.1, Cm255770.1, Cm255790.1, Cm255800.1, Cm313740.1, Cm318590.1, Cm323940.1	Cs_ont_3g014000.1, Cs_ont_5g007550.1, Cs_ont_9g001030.1, Cs_ont_9g001900.1	SYT012690.1, SYT025020.1, SYT074450.1, SYT181740.1, SYT191930.1, SYT205250.1, SYT246240.1	Cic146440.1, Cic147270.1, Cic213130.1, Cic213660.1, Cic216650.1, Cic216660.1, Cic216670.1, Cic216710.1, Cic216720.1, Cic229220.1	Pt3g036290.1, Pt5g012420.1, Pt5g012960.1, Pt5g015260.1, Pt5g015270.1, Pt5g015280.1, Pt5g015290.1, Pt5g015310.1, Pt9g000890.1, Pt9g001670.1, PtUn023600.1, PtUn029210.1, PtUn029220.1, PtUn029230.1, PtUn029240.1, PtUn035720.1	H1Y12222.1, H1Y12280.1, H1Y12948.1, H1Y12952.1, H1Y12959.1, H1Y12960.1, H1Y12964.1, H1Y12970.1, H1Y12973.1, H1Y12977.1, H1Y12980.1, H1Y12983.1, H1Y12987.1, H1Y13004.1, H1Y13009.1, H1Y13015.1, H1Y13024.1, H1Y20550.1, H1Y28441.1, H1Y37882.1, H1Y37977.1	H2Y11944.1, H2Y12008.1, H2Y12544.1, H2Y12550.1, H2Y12560.1, H2Y12566.1, H2Y12569.1, H2Y12570.1, H2Y12578.1, H2Y12581.1, H2Y12582.1, H2Y12588.1, H2Y12594.1, H2Y12603.1, H2Y12605.1, H2Y12618.1, H2Y12633.1, H2Y20242.1, H2Y37800.1, H2Y37895.1
OG0012678		OG0000048	Aeg005100.1, Aeg171680.1, Aeg258040.1	Egl067630.1, Egl067640.1, Egl067650.1, Egl067660.1, Egl067670.1, Egl067680.1, Egl067720.1, Egl067750.1, Egl067770.1, Egl067790.1	Citropsis018460.1, Citropsis158760.1, Citropsis158820.1, Citropsis158830.1, Citropsis158840.1, Citropsis158850.1, Citropsis158860.1, Citropsis158910.1, Citropsis158920.1, Citropsis158930.1, Citropsis158940.1, Citropsis158950.1	CP1g001252.t1, CP3g003863.t1, CP3g003871.t1, CP3g003872.t1, CP3g003875.t1, CP3g003877.t1, CP3g003878.t1, CP3g003883.t1, CP3g003891.t1, CP3g003892.t1, CP3g003893.t1, CP3g003894.t1, CP3g003896.t1, CP3g003898.t1, CP3g003902.t1, CP3g003903.t1	Ciclev10003198m.1, Ciclev10003229m.1, Ciclev10003264m.1, Ciclev10003295m.1, Ciclev10003296m.1, Ciclev10003303m.1, Ciclev10003345m.1, Ciclev10003521m.1, Ciclev10003659m.1, Ciclev10003820m.1, Ciclev10003875m.1, Ciclev10003926m.1, Ciclev10003952m.1, Ciclev10003972m.1	Fh3g03880.1, Fh3g03900.1, Fh3g03910.1, Fh3g03920.1, Fh3g03950.1, Fh3g03970.1, Fh3g03980.1, Fh3g03990.1, Fh3g04060.1, FhUn03690.1, FhUn03720.1, FhUn03730.1, FhUn03770.1, FhUn03800.1, FhUn03810.1, FhUn03870.1, FhUn03880.1	Chh043150.1, Chh043190.1, Chh043200.1, Chh043210.1, Chh043220.1, Chh043240.1, Chh066250.1, Chh066260.1, Chh066270.1, Chh097980.1, Chh098000.1, Chh098010.1, Chh098040.1, Chh145080.1, Chh145100.1, Chh145110.1, Chh145120.1, Chh145150.1, Chh145160.1, Chh145170.1, Chh145180.1, Chh145200.1, Chh145210.1	Abu3g_002500.1, Abu3g_002510.1, Abu3g_002540.1, Abu3g_002560.1, Abu3g_002570.1, Abu3g_002580.1, Abu3g_003020.1	HP150720.1, HP150730.1, HP150740.1, HP150760.1, HP150770.1, HP150780.1	Cg3g000100.1, Cg3g000110.1, Cg3g000180.1, Cg3g000240.1, Cg3g000260.1		JLX230710.1, JLX230850.1, JLX230900.1, JLX230990.1, JLX231500.1, JLX231630.1, JLX231670.1	LW071620.1, LW071630.1, LW071640.1, LW071650.1, LW071680.1, LW071700.1, LW269960.1, LW269970.1, LW269980.1, LW270060.1, LW270080.1, LW270090.1, LW270100.1, LW270130.1, LW270170.1	Cms131370.1, Cms131380.1, Cms131450.1, Cms131510.1, Cms131520.1, Cms131600.1, Cms131620.1, Cms131630.1, Cms204110.1, Cms204120.1, Cms204190.1, Cms204200.1, Cms204210.1, Cms204220.1, Cms204230.1, Cms204240.1, Cms204250.1, Cms204270.1, Cms224460.1, Cms224470.1	Cm105800.1, Cm105820.1, Cm105850.1, Cm105860.1, Cm105880.1, Cm105900.1, Cm207060.1, Cm207070.1	Cs_ont_3g030330.1, Cs_ont_3g030380.1, Cs_ont_3g030390.1, Cs_ont_3g030410.1, Cs_ont_3g030430.1, Cs_ont_3g030440.1, Cs_ont_3g030450.1	SYT010690.1, SYT045420.1, SYT069000.1, SYT069010.1, SYT243190.1, SYT243200.1	Cic170520.1, Cic170550.1, Cic170570.1, Cic170580.1, Cic246260.1, Cic246290.1, Cic246300.1, Cic246310.1, Cic246320.1, Cic246330.1, Cic246350.1, Cic246400.1, Cic246410.1, Cic246430.1, Cic246440.1	PtUn015130.1, PtUn015140.1, PtUn015170.1, PtUn015190.1, PtUn015200.1, PtUn015210.1, PtUn021820.1, PtUn021840.1, PtUn021860.1, PtUn028220.1	H1Y15126.1, H1Y15139.1, H1Y15148.1, H1Y15150.1, H1Y15159.1, H1Y15163.1, H1Y15167.1, H1Y15172.1, H1Y15173.1, H1Y15175.1, H1Y15183.1	H2Y14619.1, H2Y14620.1, H2Y14626.1, H2Y14627.1, H2Y14629.1, H2Y14632.1, H2Y14634.1, H2Y14635.1, H2Y14636.1, H2Y14640.1, H2Y14645.1
OG0012679		OG0000049	Aeg096780.1, Aeg272680.1, Aeg272700.1, Aeg272720.1	Egl185370.1, Egl281470.1, Egl305710.1, Egl305720.1, Egl305750.1, Egl305780.1, Egl305790.1, Egl305800.1, Egl305810.1, Egl305840.1, Egl305850.1, Egl305860.1, Egl305900.1, Egl305910.1, Egl305920.1, Egl305930.1, Egl305950.1, Egl305980.1, Egl306000.1, Egl306020.1, Egl306050.1, Egl306060.1	Citropsis215820.1, Citropsis215830.1, Citropsis215840.1, Citropsis215860.1	CP1g001319.t1, CP1g001320.t1, CP1g001321.t1, CP1g001325.t1, CP1g001334.t1, CP1g001341.t1, CP1g001342.t1, CP1g001343.t1, CP1g001347.t1, CP1g001348.t1, CP1g001349.t1, CP1g001350.t1, CP1g001351.t1, CP1g001353.t1, CP1g001421.t1, CP4g001576.t1, CP4g001578.t1, CP4g001580.t1	Ciclev10007349m.1, Ciclev10010335m.1, Ciclev10024814m.1, Ciclev10024817m.1, Ciclev10024820m.1, Ciclev10024821m.1, Ciclev10027029m.1, Ciclev10027440m.1, Ciclev10027601m.1	Fh1g17840.1, Fh1g18350.1, Fh1g18370.1, Fh1g18380.1, Fh1g18390.1, Fh1g18440.1, Fh1g18530.1, Fh1g18550.1, Fh1g18590.1, Fh4g17720.1, Fh4g17740.1, Fh4g17750.1, Fh4g17780.1	Chh094650.1, Chh187610.1, Chh187630.1, Chh211270.1, Chh211630.1, Chh211650.1, Chh211660.1, Chh211670.1, Chh211690.1, Chh211710.1, Chh260910.1, Chh260930.1, Chh260940.1, Chh260960.1, Chh260980.1, Chh306370.1, Chh306400.1, Chh306420.1, Chh306430.1	Abu1g_016390.1, Abu1g_016880.1, Abu1g_016890.1, Abu1g_016900.1, Abu1g_016910.1, Abu1g_016920.1, Abu1g_016930.1, Abu1g_016940.1, Abu1g_016950.1, Abu1g_016960.1, Abu4g_001140.1	HP054390.1, HP054400.1, HP095070.1, HP095080.1, HP095090.1, HP095110.1, HP095140.1, HP095190.1, HP133820.1, HP134620.1, HP143260.1, HP285660.1, HP285690.1, HP285700.1, HP285710.1, HP285720.1, HP285740.1, HP285750.1, HP285760.1, HP285770.1	Cg1g019990.1, Cg1g021130.1, Cg1g021150.1, Cg1g021170.1, Cg1g021230.1, Cg1g021240.1, Cg1g021270.1, Cg1g021280.1, Cg2g021410.1, Cg2g021420.1, Cg2g021440.1	Cmt204640.1, Cmt264520.1	JLX029950.1, JLX030080.1, JLX110860.1, JLX113230.1, JLX116940.1, JLX190290.1, JLX190510.1, JLX190810.1, JLX191350.1	LW157710.1	Cms013020.1, Cms013030.1, Cms094010.1, Cms094410.1, Cms094420.1, Cms094430.1, Cms094440.1, Cms094450.1, Cms094470.1, Cms094480.1, Cms094500.1, Cms094520.1, Cms094550.1, Cms094570.1	Cm058220.1, Cm058230.1, Cm137930.1, Cm137940.1, Cm137950.1, Cm137960.1, Cm137970.1, Cm137990.1, Cm269790.1, Cm309400.1	Cs_ont_1g011210.1, Cs_ont_1g011220.1, Cs_ont_1g011230.1, Cs_ont_1g011240.1, Cs_ont_1g011260.1, Cs_ont_1g011290.1, Cs_ont_1g011300.1, Cs_ont_1g011320.1, Cs_ont_1g011340.1, Cs_ont_1g011350.1, Cs_ont_1g011360.1, Cs_ont_1g011380.1, Cs_ont_1g011420.1, Cs_ont_1g011430.1, Cs_ont_1g011470.1, Cs_ont_1g011500.1, Cs_ont_1g011520.1, Cs_ont_1g011530.1, Cs_ont_1g011540.1, Cs_ont_1g012140.1, Cs_ont_4g015140.1	SYT083590.1, SYT204730.1, SYT204770.1, SYT204790.1, SYT204800.1, SYT215080.1		Pt1g008080.1, Pt1g011840.1, Pt7g005970.1, Pt7g005980.1, Pt7g006380.1	H1Y03629.1, H1Y03630.1, H1Y03631.1, H1Y03633.1, H1Y03634.1, H1Y03636.1, H1Y03638.1, H1Y03710.1, H1Y17950.1	H2Y03197.1, H2Y03199.1, H2Y03201.1, H2Y03207.1, H2Y03208.1, H2Y03211.1, H2Y03214.1, H2Y03286.1, H2Y17504.1, H2Y17506.1
OG0012680		OG0000050	Aeg107720.1, Aeg107740.1, Aeg209760.1, Aeg209770.1, Aeg209780.1, Aeg209800.1, Aeg209810.1	Egl216110.1, Egl216120.1, Egl216140.1, Egl216150.1, Egl216160.1, Egl216180.1, Egl216190.1, Egl294720.1, Egl294730.1	Citropsis048000.1, Citropsis048010.1, Citropsis119830.1, Citropsis119860.1	CP4g000043.t1, CP4g000044.t1, CP8g002637.t1, CP8g002638.t1, CP8g002639.t1, CP8g002642.t1, CP8g002644.t1, CP8g002646.t1, CP8g002648.t1, CP8g002652.t1, CP8g002653.t1, CP8g002655.t1, CP8g002656.t1, CP8g002660.t1, CP8g002661.t1	Ciclev10007520m.1, Ciclev10010726m.1, Ciclev10010769m.1, Ciclev10027866m.1, Ciclev10027910m.1, Ciclev10028151m.1, Ciclev10028370m.1, Ciclev10030037m.1, Ciclev10030156m.1, Ciclev10030182m.1, Ciclev10030238m.1	Fh4g32230.1, Fh4g32250.1, Fh8g23400.1, Fh8g23420.1, Fh8g23440.1, Fh8g23450.1, Fh8g23460.1, Fh8g23470.1, Fh8g23480.1, Fh8g23510.1, Fh8g23520.1, Fh8g23620.1, Fh8g23630.1, Fh8g23640.1, Fh8g23650.1, Fh8g23660.1, Fh8g23680.1, Fh8g23700.1, Fh8g23720.1, Fh8g23730.1, Fh8g23770.1, Fh8g23780.1	Chh075640.1, Chh075660.1, Chh247200.1, Chh247210.1, Chh247220.1, Chh247230.1, Chh247240.1, Chh247250.1, Chh247260.1, Chh247270.1, Chh247280.1, Chh247290.1, Chh247300.1, Chh247310.1, Chh259540.1	Abu4g_014050.1, Abu4g_014060.1, Abu8g_007290.1, Abu8g_007310.1, Abu8g_007320.1	HP240780.1, HP240800.1, HP277840.1, HP277850.1, HP277870.1, HP277890.1, HP277920.1	Cg4g024590.1, Cg4g024600.1, Cg4g024610.1, Cg8g018400.1, Cg8g018410.1, Cg8g018420.1, Cg8g018430.1, Cg8g018440.1, Cg8g018460.1, Cg8g018470.1	Cmt047040.1, Cmt047050.1, Cmt047070.1, Cmt047080.1, Cmt047090.1, Cmt047110.1, Cmt047130.1, Cmt047140.1, Cmt047150.1, Cmt191430.1, Cmt191450.1	JLX174160.1, JLX181880.1, JLX229250.1, JLX229770.1	LW025380.1, LW025390.1, LW025400.1, LW025420.1, LW025430.1, LW025450.1, LW025460.1, LW296190.1, LW296200.1	Cms022070.1, Cms199300.1, Cms199310.1, Cms199330.1, Cms199340.1, Cms199360.1	Cm007760.1, Cm007780.1, Cm102610.1, Cm231020.1, Cm231030.1, Cm231050.1, Cm231060.1, Cm246850.1, Cm246870.1, Cm246880.1, Cm246900.1, Cm271990.1, Cm272000.1, Cm300960.1, Cm304810.1, Cm306830.1	Cs_ont_4g028290.1, Cs_ont_4g028310.1	SYT049660.1, SYT049670.1, SYT182950.1, SYT182960.1, SYT198930.1, SYT198940.1, SYT198950.1	Cic095920.1, Cic095930.1, Cic095950.1, Cic108960.1, Cic108970.1, Cic108980.1, Cic108990.1, Cic109000.1, Cic109010.1, Cic109020.1, Cic109030.1, Cic109040.1, Cic109050.1, Cic109060.1, Cic109070.1, Cic109080.1, Cic286760.1	Pt1g019450.1, Pt8g006840.1, Pt8g006850.1, Pt8g006860.1, Pt8g006870.1	H1Y19628.1, H1Y19630.1, H1Y34689.1, H1Y34690.1, H1Y34692.1, H1Y34693.1, H1Y34698.1, H1Y34699.1, H1Y34703.1, H1Y34704.1, H1Y34705.1, H1Y34707.1, H1Y34708.1, H1Y34713.1, H1Y34714.1	H2Y19313.1, H2Y19314.1, H2Y19315.1, H2Y34272.1, H2Y34273.1, H2Y34274.1, H2Y34275.1, H2Y34276.1, H2Y34277.1, H2Y34278.1, H2Y34279.1, H2Y34280.1, H2Y34284.1, H2Y34285.1, H2Y34286.1, H2Y34288.1, H2Y34290.1, H2Y34292.1, H2Y34293.1, H2Y34295.1, H2Y34296.1
OG0012681		OG0000051	Aeg232760.1, Aeg232790.1, Aeg232800.1, Aeg232810.1, Aeg232840.1, Aeg232860.1	Egl128230.1, Egl229010.1, Egl229030.1, Egl229100.1	Citropsis016690.1, Citropsis016740.1, Citropsis016770.1, Citropsis016780.1, Citropsis016790.1, Citropsis018420.1, Citropsis018440.1, Citropsis203050.1, Citropsis203060.1, Citropsis203070.1, Citropsis203090.1, Citropsis203300.1, Citropsis206570.1	CP9g000827.t1, CP9g000830.t1, CP9g000831.t1, CP9g000832.t1, CP9g001327.t1, CP9g001328.t1, CP9g001329.t1, CP9g001330.t1, CP9g001331.t1, CP9g001332.t1, CP9g001334.t1, CP9g001341.t1, CP9g001345.t1, CP9g001358.t1, CP9g001460.t1	Ciclev10004874m.1, Ciclev10004982m.1, Ciclev10005001m.1, Ciclev10005049m.1, Ciclev10005050m.1, Ciclev10005120m.1, Ciclev10005168m.1, Ciclev10006493m.1, Ciclev10006643m.1, Ciclev10006659m.1, Ciclev10007039m.1	Fh9g07620.1, Fh9g07630.1, Fh9g12210.1, Fh9g12220.1, Fh9g12240.1, Fh9g12250.1, Fh9g12290.1, Fh9g12300.1, Fh9g12330.1, Fh9g12340.1, Fh9g12450.1, Fh9g12460.1		Abu1g_020250.1, Abu1g_020350.1, Abu9g_007680.1, Abu9g_007710.1, Abu9g_007720.1, Abu9g_011060.1, Abu9g_011120.1, Abu9g_011140.1	HP108270.1, HP175780.1, HP175840.1, HP262990.1, HP263000.1, HP263050.1, HP263090.1, HP263270.1, HP282350.1, HP291050.1	Cg9g007530.1, Cg9g011010.1, Cg9g011020.1, Cg9g011040.1, Cg9g011040.3.1, Cg9g011070.1, Cg9g011080.1, Cg9g011090.1, Cg9g011100.1, Cg9g011110.1, Cg9g011160.1, Cg9g011200.1, Cg9g011270.1, CgUng022100.1	Cmt147610.1	JLX093480.1, JLX093830.1, JLX093970.1, JLX094040.1, JLX094270.1, JLX094340.1, JLX094400.1, JLX095140.1, JLX206180.1	LW268320.1	Cms066220.1, Cms066250.1, Cms066270.1, Cms066280.1, Cms152380.1, Cms152410.1, Cms152510.1, Cms152530.1, Cms152550.1, Cms152560.1	Cm054480.1, Cm054490.1, Cm054530.1, Cm054540.1, Cm054570.1, Cm054590.1, Cm054630.1, Cm054640.1, Cm054650.1, Cm058260.1, Cm058300.1, Cm312460.1	Cs_ont_9g007490.1, Cs_ont_9g007510.1, Cs_ont_9g011960.1, Cs_ont_9g011970.1, Cs_ont_9g012020.1, Cs_ont_9g012060.1, Cs_ont_9g012070.1, Cs_ont_9g012080.1, Cs_ont_9g012100.1, Cs_ont_9g012110.1, Cs_ont_9g012120.1, Cs_ont_9g012150.1, Cs_ont_9g012180.1	SYT000660.1, SYT000670.1, SYT010730.1, SYT038510.1, SYT069360.1, SYT070330.1, SYT109920.1, SYT109930.1, SYT179530.1, SYT179550.1, SYT179560.1, SYT179570.1, SYT179580.1, SYT179590.1	Cic152680.1, Cic152690.1, Cic152700.1, Cic152730.1, Cic152740.1, Cic152750.1, Cic152770.1, Cic152790.1, Cic241360.1, Cic241370.1, Cic241380.1, Cic241440.1, Cic241450.1, Cic241520.1, Cic241540.1	Pt9g006760.1, Pt9g006780.1, Pt9g010280.1, Pt9g010290.1, Pt9g010300.1, Pt9g010340.1, Pt9g010420.1, PtUn013520.1, PtUn013540.1, PtUn013550.1, PtUn013570.1, PtUn013580.1	H1Y38701.1, H1Y38702.1, H1Y38704.1, H1Y39411.1, H1Y39413.1, H1Y39415.1, H1Y39419.1, H1Y39420.1, H1Y39427.1, H1Y39428.1, H1Y39435.1, H1Y39436.1, H1Y39438.1, H1Y39439.1, H1Y39441.1, H1Y39449.1, H1Y39458.1	H2Y38618.1, H2Y38619.1, H2Y39341.1, H2Y39343.1, H2Y39345.1, H2Y39349.1, H2Y39352.1, H2Y39353.1, H2Y39362.1, H2Y39369.1, H2Y39370.1, H2Y39379.1, H2Y39380.1, H2Y39388.1, H2Y39389.1, H2Y39391.1, H2Y39392.1, H2Y39394.1, H2Y39404.1, H2Y39414.1, H2Y39427.1
OG0012683		OG0000052		Egl046090.1, Egl080810.1, Egl100600.1, Egl126900.1, Egl173030.1, Egl182730.1, Egl182740.1, Egl182840.1, Egl182860.1, Egl185420.1, Egl205320.1, Egl240430.1, Egl293660.1, Egl293670.1, Egl294120.1, Egl303400.1	Citropsis027060.1, Citropsis033550.1, Citropsis052890.1, Citropsis061560.1, Citropsis118780.1, Citropsis118830.1, Citropsis119230.1, Citropsis119260.1, Citropsis148900.1, Citropsis148910.1, Citropsis161000.1, Citropsis161010.1, Citropsis168440.1, Citropsis215520.1, Citropsis216290.1, Citropsis237870.1	CP1g000599.t1, CP1g001285.t1, CP1g001426.t1, CP1g002061.t1, CP3g002172.t1, CP3g002177.t1, CP3g002178.t1, CP4g000103.t1, CP4g000104.t1, CP4g000105.t1, CP4g000161.t1, CP4g000163.t1, CP4g000164.t1, CP4g000447.t1, CP5g002702.t1, CP7g003012.t1, CP8g000207.t1	Ciclev10010833m.1, Ciclev10026558m.1	Fh1g13260.1, Fh1g17790.1, Fh1g18960.1, Fh1g26610.1, Fh3g19460.1, Fh3g19470.1, Fh3g19490.1, Fh4g28430.1, Fh4g31160.1, Fh4g31180.1, Fh4g31700.1, Fh5g26700.1, Fh7g03600.1		Abu1g_013350.1, Abu1g_016350.1, Abu1g_017270.1, Abu1g_021780.1, Abu3g_009910.1, Abu4g_014530.1, Abu4g_014980.1, Abu4g_017380.1, Abu5g_022240.1, Abu7g_003790.1, Abuscaffold_367_000010.1	HP003670.1, HP071510.1, HP071520.1, HP071530.1, HP117930.1, HP118220.1, HP128730.1, HP134150.1, HP134170.1, HP136740.1, HP241330.1, HP241760.1, HP244170.1, HP285520.1	Cg1g015080.1, Cg1g020030.1, Cg1g025190.1, Cg2g025640.1, Cg3g010730.1, Cg3g010740.1, Cg4g015450.1, Cg4g020220.1, Cg4g023550.1, Cg4g023560.1, Cg4g024050.1, Cg4g024060.1, Cg7g004370.1, Cg8g001100.1, CgUng018140.1, CgUng018150.1		JLX029700.1, JLX038390.1, JLX043490.1, JLX090360.1, JLX108890.1, JLX112290.1, JLX122520.1, JLX130920.1, JLX162880.1, JLX190970.1, JLX217250.1	LW050100.1, LW069410.1, LW069420.1, LW108580.1, LW142230.1, LW174600.1, LW178440.1, LW219780.1, LW292660.1, LW295240.1, LW295690.1, LW307500.1	Cms001040.1, Cms001070.1, Cms001080.1, Cms020990.1, Cms021000.1, Cms021480.1, Cms093960.1, Cms094860.1, Cms156780.1, Cms160360.1, Cms160370.1, Cms168940.1, Cms181650.1, Cms188540.1, Cms242150.1, Cms279550.1	Cm008310.1, Cm008320.1, Cm008760.1, Cm008780.1, Cm008790.1, Cm054030.1, Cm057850.1, Cm076980.1, Cm140770.1, Cm192990.1, Cm197290.1, Cm197300.1, Cm197310.1, Cm209300.1, Cm214160.1, Cm217130.1, Cm310760.1	Cs_ont_5g024640.1	SYT012390.1, SYT013220.1, SYT013550.1, SYT019390.1, SYT050170.1, SYT050580.1, SYT058200.1, SYT060470.1, SYT108510.1, SYT108520.1, SYT140420.1	Cic176540.1	Pt1g019960.1, Pt1g020350.1, Pt1g022660.1, Pt3g019970.1, Pt3g020640.1, Pt4g019160.1, Pt5g015050.1, Pt5g015090.1, Pt5g017020.1, Pt5g025870.1, Pt7g005690.1, Pt7g006440.1, Pt7g009430.1, Pt7g009470.1, Pt8g001060.1, PtUn022700.1, PtUn030320.1	H1Y02722.1, H1Y03579.1, H1Y03717.1, H1Y04257.1, H1Y13066.1, H1Y13071.1, H1Y19217.1, H1Y19512.1, H1Y19514.1, H1Y19565.1, H1Y19568.1, H1Y19570.1, H1Y22668.1, H1Y30390.1	H2Y02205.1, H2Y03122.1, H2Y03293.1, H2Y03859.1, H2Y12662.1, H2Y12663.1, H2Y18909.1, H2Y19202.1, H2Y19253.1, H2Y19255.1, H2Y22510.1, H2Y30160.1
OG0012684		OG0000053	Aeg006320.1, Aeg006900.1, Aeg241640.1	Egl023180.1, Egl024020.1, Egl159230.1, Egl159240.1, Egl159260.1, Egl165880.1, Egl268610.1, Egl291380.1, Egl292640.1, Egl292670.1		CP2g001511.t1, CP2g003584.t1, CP3g003176.t1, CP3g003187.t1, CP3g003195.t1, CP3g003199.t1, CP3g003200.t1, CP3g003469.t1, CP3g003478.t1, CP9g002430.t1, CP9g002909.t1, CP9g002911.t1, CP9g002912.t1	Ciclev10001089m.1, Ciclev10001101m.1, Ciclev10001158m.1, Ciclev10001160m.1, Ciclev10003749m.1, Ciclev10003910m.1, Ciclev10004997m.1, Ciclev10006464m.1, Ciclev10006482m.1, Ciclev10006823m.1, Ciclev10015146m.1, Ciclev10015171m.1	Fh2g04180.1, Fh2g04250.1, Fh2g04260.1, Fh2g23650.1, Fh3g08070.1, Fh3g08130.1, Fh3g08220.1, Fh3g08240.1, Fh3g10140.1, Fh3g10580.1, Fh9g22600.1, Fh9g26720.1, Fh9g26740.1, Fh9g26750.1	Chh012780.1, Chh105170.1, Chh105970.1, Chh106060.1, Chh226250.1, Chh276790.1	Abu2g_012890.1, Abu2g_027130.1, Abu2g_027250.1, Abu2g_027260.1, Abu2g_027420.1, Abu2g_027460.1, Abu2g_027560.1, Abu3g_004850.1, Abu3g_004860.1, Abu3g_004900.1, Abu3g_004920.1, Abu3g_005590.1, Abu9g_017590.1, Abu9g_021510.1, Abu9g_021520.1, Abu9g_021530.1	HP041380.1, HP041440.1, HP041520.1, HP063410.1, HP067980.1, HP067990.1, HP152750.1, HP152760.1, HP152780.1, HP152790.1, HP152810.1, HP152830.1, HP226850.1, HP226990.1, HP227790.1, HP229270.1, HP280320.1, HP280340.1	Cg2g029370.1, Cg3g002770.1, Cg3g002790.1, Cg3g004610.1, Cg3g004640.1, Cg3g005670.1, Cg3g005700.1, Cg3g005800.1, Cg9g023150.1, Cg9g027720.1, Cg9g027740.1, Cg9g027750.1, CgUng013160.1	Cmt108200.1, Cmt137070.1	JLX021510.1, JLX022550.1, JLX023580.1, JLX150370.1, JLX150650.1, JLX154640.1, JLX200700.1, JLX201890.1	LW044690.1, LW074190.1, LW074290.1, LW075730.1, LW075800.1, LW075860.1, LW075940.1, LW076070.1, LW200860.1, LW238100.1, LW238110.1, LW246610.1, LW246620.1, LW246630.1, LW246640.1	Cms044780.1, Cms044800.1, Cms044810.1, Cms072150.1, Cms072170.1, Cms097230.1, Cms097260.1, Cms097460.1, Cms132910.1, Cms161550.1, Cms161560.1, Cms161580.1, Cms202380.1, Cms221380.1, Cms221510.1, Cms253200.1, Cms281790.1		Cs_ont_2g031910.1, Cs_ont_3g025980.1, Cs_ont_3g026050.1, Cs_ont_3g026080.1, Cs_ont_3g027600.1, Cs_ont_3g027630.1, Cs_ont_9g022590.1, Cs_ont_9g026690.1, Cs_ont_9g026710.1, Cs_ont_9g026720.1	SYT009870.1, SYT011640.1, SYT071430.1, SYT071440.1, SYT130230.1, SYT130250.1, SYT130310.1, SYT231170.1	Cic067190.1, Cic163100.1, Cic184880.1	Pt2g002620.1, Pt2g002630.1, Pt2g002720.1, Pt2g018220.1, Pt5g020070.1, Pt5g020120.1, Pt5g020160.1, Pt5g022960.1, Pt5g022970.1, Pt5g022980.1, Pt5g022990.1, Pt9g016520.1, Pt9g019020.1, Pt9g019030.1, Pt9g019050.1, PtUn009110.1, PtUn009160.1, PtUn015750.1, PtUn015760.1, PtUn020460.1, PtUn020500.1, PtUn029840.1, PtUn036370.1	H1Y07498.1, H1Y10137.1, H1Y14242.1, H1Y14262.1, H1Y14271.1, H1Y14277.1, H1Y14280.1, H1Y14584.1, H1Y14601.1, H1Y41312.1, H1Y41846.1, H1Y41848.1, H1Y41849.1	H2Y07075.1, H2Y09742.1, H2Y13822.1, H2Y13849.1, H2Y14102.1, H2Y14114.1, H2Y14121.1, H2Y14136.1, H2Y41317.1, H2Y41810.1, H2Y41812.1, H2Y41813.1
OG0012685		OG0000054	Aeg094360.1	Egl002060.1, Egl003490.1, Egl004380.1, Egl063720.1, Egl074540.1, Egl077980.1, Egl079430.1, Egl080520.1, Egl125130.1, Egl126190.1, Egl161710.1, Egl162470.1, Egl162690.1, Egl171780.1, Egl178970.1, Egl206110.1, Egl206120.1, Egl230460.1, Egl231660.1, Egl256940.1, Egl257720.1, Egl257730.1, Egl258180.1, Egl258190.1, Egl260300.1, Egl266170.1, Egl275410.1, Egl281370.1, Egl286840.1, Egl299460.1	Citropsis002730.1, Citropsis002740.1, Citropsis002750.1, Citropsis002760.1, Citropsis018340.1, Citropsis049320.1, Citropsis053870.1, Citropsis141200.1, Citropsis162070.1, Citropsis182490.1, Citropsis182500.1, Citropsis199290.1, Citropsis236530.1, Citropsis274780.1	CP1g001004.t1, CP1g001005.t1, CP5g005244.t1, CP6g002734.t1, CP6g002735.t1, CP8g002057.t1	Ciclev10003921m.1, Ciclev10013949m.1, Ciclev10015640m.1, Ciclev10026422m.1	Fh1g15940.1, Fh3g03600.1, Fh3g17400.1, Fh3g18330.1, Fh4g15930.1, Fh5g17850.1, Fh5g35830.1, Fh6g05760.1, Fh6g15410.1, Fh7g10450.1, Fh7g13140.1, Fh7g23100.1, Fh8g20770.1		Abu3g_016740.1, Abu4g_006950.1, Abu5g_031330.1, Abu5g_031340.1, Abu7g_001440.1, Abu7g_001450.1, Abu7g_001460.1	HP037220.1, HP149680.1, HP190880.1, HP282850.1, HP282860.1, HP289850.1	Cg2g011900.1, Cg2g026500.1, Cg2g033250.1, Cg3g012610.1, Cg5g018040.1, Cg5g019500.1, Cg8g010080.1, Cg8g010090.1, Cg9g020720.1, CgUng000170.1, CgUng000180.1	Cmt010820.1, Cmt010830.1, Cmt047940.1, Cmt075560.1, Cmt103110.1, Cmt104810.1, Cmt113670.1, Cmt113680.1, Cmt114560.1, Cmt120200.1, Cmt142800.1, Cmt151000.1, Cmt242770.1, Cmt265450.1	JLX027560.1, JLX083330.1, JLX172950.1	LW113230.1, LW149020.1, LW184130.1, LW184140.1, LW203800.1, LW203810.1, LW249590.1, LW249600.1, LW249610.1, LW259470.1, LW263270.1, LW263280.1, LW305900.1	Cms002710.1, Cms002720.1, Cms131120.1, Cms131130.1, Cms152220.1, Cms167860.1, Cms199570.1, Cms204760.1, Cms214700.1, Cms223590.1, Cms223600.1, Cms237050.1, Cms237060.1	Cm078680.1, Cm083370.1, Cm097360.1, Cm108660.1, Cm116710.1, Cm126970.1, Cm138580.1, Cm145870.1, Cm145880.1, Cm145890.1, Cm147750.1, Cm147760.1, Cm149590.1, Cm163570.1, Cm173370.1, Cm173380.1, Cm211100.1, Cm211110.1, Cm216930.1, Cm294920.1, Cm305070.1, Cm318220.1, Cm318230.1	Cs_ont_2g027440.1, Cs_ont_3g013390.1, Cs_ont_3g031470.1, Cs_ont_4g018170.1, Cs_ont_5g031970.1, Cs_ont_9g009620.1		Cic029550.1, Cic029560.1, Cic048950.1, Cic048960.1, Cic051190.1, Cic056310.1, Cic056320.1, Cic093250.1, Cic115020.1, Cic115030.1, Cic159700.1, Cic159710.1, Cic169090.1, Cic177180.1, Cic177190.1, Cic179860.1, Cic183080.1, Cic185760.1, Cic187470.1, Cic187480.1, Cic188600.1, Cic218410.1, Cic263480.1	Pt2g011810.1, Pt6g017730.1, Pt7g013810.1, PtUn006520.1, PtUn006650.1, PtUn016880.1	H1Y02329.1, H1Y03228.1, H1Y07651.1, H1Y08849.1, H1Y15648.1, H1Y18402.1, H1Y22508.1, H1Y29394.1, H1Y35329.1, H1Y39004.1, H1Y40876.1	H2Y02128.1, H2Y02735.1, H2Y03029.1, H2Y09091.1, H2Y11885.1, H2Y13245.1, H2Y14759.1, H2Y23847.1, H2Y29028.1, H2Y29029.1, H2Y31325.1, H2Y34953.1
OG0012687		OG0000055	Aeg050850.1, Aeg084040.1, Aeg168420.1, Aeg244600.1, Aeg284350.1	Egl082950.1, Egl118920.1, Egl133010.1, Egl163060.1, Egl182810.1, Egl265270.1, Egl267320.1, Egl275730.1	Citropsis115480.1, Citropsis123190.1, Citropsis158960.1, Citropsis164360.1	CP1g000012.t1, CP1g001413.t1, CP1g001868.t1, CP2g002332.t1, CP2g003420.t1, CP2g004007.t1, CP4g002092.t1, CP4g002208.t1, CP5g001127.t1, CP5g004805.t1, CP5g004858.t1, CP6g001924.t1, CP7g001714.t1, CP7g001915.t1, CP7g002796.t1, CP8g001667.t1, CP8g001848.t1, CP8g001883.t1, CP9g000089.t1, CP9g001308.t1, CP9g001339.t1, CP9g001946.t1, CP9g002374.t1, CP9g002382.t1, CP9g002701.t1		Fh1g17550.1, Fh1g19230.1, Fh2g09700.1, Fh2g26230.1, Fh3g00490.1, Fh3g02070.1, Fh3g05220.1, Fh3g06090.1, Fh3g15490.1, Fh4g04460.1, Fh4g11300.1, Fh4g24000.1, Fh5g21620.1, Fh5g27820.1, Fh5g34900.1, Fh5g35000.1, Fh5g35950.1, Fh6g15040.1, Fh6g17470.1, Fh8g16470.1, Fh8g17010.1, Fh8g21110.1, Fh9g08070.1, Fh9g09060.1, Fh9g17730.1, Fh9g19380.1, FhUn05130.1, FhUn05460.1, FhUn05580.1	Chh000150.1, Chh039650.1, Chh110410.1, Chh128640.1, Chh145940.1, Chh149730.1, Chh177190.1, Chh188160.1, Chh223830.1, Chh223880.1, Chh231110.1, Chh231670.1, Chh232690.1, Chh244450.1, Chh257500.1, Chh283570.1, Chh299630.1	Abu1g_020680.1, Abu6g_018660.1	HP063470.1				LW022900.1, LW052130.1, LW136100.1, LW141120.1, LW184390.1, LW260550.1, LW307800.1, LW313160.1	Cms047810.1, Cms150340.1, Cms189870.1, Cms224100.1	Cm088820.1, Cm291580.1	Cs_ont_6g025590.1, Cs_ont_6g025800.1, Cs_ont_8g015680.1	SYT072450.1, SYT113930.1	Cic101920.1, Cic140530.1		H1Y02665.1, H1Y02791.1, H1Y03277.1, H1Y04038.1, H1Y05383.1, H1Y09290.1, H1Y12685.1, H1Y13351.1, H1Y13357.1, H1Y14444.1, H1Y15652.1, H1Y16331.1, H1Y16501.1, H1Y17210.1, H1Y17453.1, H1Y17510.1, H1Y17647.1, H1Y18372.1, H1Y19304.1, H1Y21388.1, H1Y21643.1, H1Y22070.1, H1Y22370.1, H1Y25303.1, H1Y25388.1, H1Y25439.1, H1Y28181.1, H1Y28659.1, H1Y29714.1, H1Y29719.1, H1Y29724.1, H1Y29743.1, H1Y29771.1, H1Y…	H2Y03318.1, H2Y05535.1, H2Y06651.1, H2Y08450.1, H2Y09834.1, H2Y10131.1, H2Y11609.1, H2Y12170.1, H2Y12317.1, H2Y12659.1, H2Y13172.1, H2Y14425.1, H2Y14931.1, H2Y17745.1, H2Y18399.1, H2Y18950.1, H2Y20947.1, H2Y21523.1, H2Y21858.1, H2Y22194.1, H2Y22562.1, H2Y22870.1, H2Y24799.1, H2Y25044.1, H2Y28116.1, H2Y29242.1, H2Y29554.1, H2Y29558.1, H2Y29585.1, H2Y29612.1, H2Y29646.1, H2Y29988.1, H2Y31576.1, H2Y…
OG0012688		OG0000056	Aeg002630.1, Aeg002660.1, Aeg275680.1			CP1g002010.t1	Ciclev10000360m.1, Ciclev10003787m.1, Ciclev10004229m.1, Ciclev10004247m.1, Ciclev10004266m.1, Ciclev10004293m.1, Ciclev10004386m.1, Ciclev10004392m.1, Ciclev10006830m.1, Ciclev10007091m.1, Ciclev10013594m.1, Ciclev10013944m.1, Ciclev10013948m.1, Ciclev10024863m.1, Ciclev10024901m.1, Ciclev10025171m.1, Ciclev10025175m.1, Ciclev10025188m.1, Ciclev10027419m.1, Ciclev10030526m.1, Ciclev10030536m.1, …	Fh1g13640.1, Fh1g13680.1, Fh1g13710.1, Fh1g13730.1, Fh1g13810.1, Fh1g17540.1, Fh1g20520.1, Fh1g20620.1, Fh1g20730.1, Fh1g20770.1, Fh1g20780.1, Fh1g20800.1, Fh1g20820.1, Fh3g14740.1, Fh3g16990.1, Fh6g00670.1, Fh9g15810.1, Fh9g15820.1, Fh9g20790.1, Fh9g20820.1, Fh9g20870.1, Fh9g20880.1, Fh9g20890.1, Fh9g20930.1, FhUn02670.1, FhUn07280.1, FhUn07310.1, FhUn07320.1, FhUn07370.1, FhUn07380.1, FhUn07470…	Chh259840.1	Abu1g_013630.1, Abu3g_007700.1	HP050390.1, HP061330.1, HP289890.1	Cg1g015830.1, Cg1g021530.1, Cg6g014050.1, Cg6g014060.1, Cg6g014090.1, Cg9g020900.1, Cg9g021300.1, Cg9g021310.1, Cg9g021330.1, Cg9g021360.1, Cg9g021370.1, Cg9g021390.1		JLX019410.1, JLX019860.1, JLX019940.1, JLX020800.1, JLX021380.1, JLX021540.1, JLX038310.1, JLX048790.1, JLX048800.1, JLX048820.1, JLX048860.1, JLX048880.1, JLX048890.1, JLX048940.1, JLX048960.1, JLX061250.1, JLX065390.1, JLX089400.1, JLX089430.1, JLX089450.1, JLX090530.1, JLX135410.1, JLX135500.1, JLX158310.1, JLX158320.1, JLX191020.1, JLX207750.1, JLX207770.1, JLX208920.1, JLX209720.1, JLX209730…	LW046640.1, LW053790.1	Cms096650.1		Cs_ont_6g026230.1, Cs_ont_7g015250.1	SYT014890.1, SYT141500.1, SYT145500.1	Cic245420.1	Pt2g012120.1, Pt5g025250.1, Pt6g019200.1, Pt7g004570.1, Pt7g004590.1, Pt7g004720.1, Pt7g009860.1, Pt7g009880.1, Pt7g009910.1, Pt7g009930.1, Pt7g009950.1, Pt7g010040.1, Pt9g013130.1, PtUn021480.1, PtUn024820.1, PtUn033350.1	H1Y03237.1, H1Y03325.1, H1Y03386.1, H1Y03391.1, H1Y03397.1, H1Y03414.1, H1Y04151.1, H1Y04159.1, H1Y04163.1, H1Y04166.1, H1Y04171.1, H1Y04173.1, H1Y04175.1, H1Y04191.1, H1Y04196.1, H1Y13623.1, H1Y14816.1, H1Y14819.1, H1Y14822.1, H1Y29841.1, H1Y32231.1, H1Y40898.1, H1Y40907.1, H1Y40970.1, H1Y40973.1, H1Y40976.1, H1Y40986.1, H1Y40999.1, H1Y41014.1, H1Y41026.1, H1Y41035.1	H2Y02755.1, H2Y02858.1, H2Y02862.1, H2Y02869.1, H2Y02899.1, H2Y03735.1, H2Y03751.1, H2Y03760.1, H2Y03772.1, H2Y03776.1, H2Y03779.1, H2Y03790.1, H2Y03791.1, H2Y03796.1, H2Y03800.1, H2Y12859.1, H2Y14319.1, H2Y29665.1, H2Y36225.1, H2Y38243.1, H2Y40956.1, H2Y40966.1, H2Y40971.1, H2Y41000.1, H2Y41003.1, H2Y41007.1, H2Y41014.1, H2Y41016.1, H2Y41023.1, H2Y41028.1
OG0012689		OG0000057	Aeg006840.1, Aeg006850.1, Aeg008140.1, Aeg031940.1, Aeg078010.1, Aeg078020.1, Aeg097760.1, Aeg131720.1, Aeg179100.1, Aeg186900.1, Aeg186910.1, Aeg201780.1	Egl066090.1, Egl072690.1, Egl090570.1, Egl234020.1, Egl234040.1, Egl234050.1, Egl234060.1, Egl244410.1	Citropsis002950.1, Citropsis016110.1, Citropsis074820.1, Citropsis077060.1, Citropsis144550.1, Citropsis176100.1, Citropsis194730.1, Citropsis283410.1, Citropsis283420.1	CP2g002535.t1, CP2g002598.t1, CP2g002609.t1, CP3g000738.t1, CP3g000740.t1, CP4g001351.t1, CP4g001352.t1, CP4g001357.t1, CP5g002002.t1, CP5g005195.t1	Ciclev10024674m.1	Fh2g13290.1, Fh2g13890.1, Fh3g14490.1, Fh3g32170.1, Fh4g19770.1, Fh4g19790.1, Fh4g19860.1, Fh4g19920.1, Fh4g20080.1, Fh4g20090.1, Fh4g20100.1, Fh4g20120.1, Fh5g05690.1, Fh5g14040.1	Chh004020.1, Chh004040.1, Chh038650.1, Chh039190.1, Chh064830.1, Chh185620.1, Chh185650.1, Chh185810.1, Chh187380.1, Chh190840.1, Chh198650.1, Chh238610.1	Abu5g_018450.1	HP026600.1, HP037990.1, HP038020.1, HP054450.1, HP055640.1, HP055660.1, HP055680.1, HP059250.1, HP092280.1, HP092300.1, HP176030.1, HP176040.1	Cg2g012900.1, Cg2g022870.1, Cg2g022880.1, Cg2g022910.1, Cg2g022930.1, Cg2g022940.1, Cg2g023030.1, Cg3g005180.1, Cg3g018570.1, Cg3g018590.1, Cg5g005840.1, Cg5g022150.1, Cg5g026880.1		JLX002320.1, JLX018300.1, JLX115990.1, JLX118040.1, JLX133740.1, JLX153820.1, JLX153960.1	LW013710.1, LW301280.1	Cms007780.1, Cms081560.1, Cms081570.1, Cms115070.1, Cms124820.1, Cms125240.1, Cms130300.1, Cms130450.1, Cms165060.1, Cms170560.1, Cms170570.1, Cms170590.1, Cms185900.1	Cm055040.1, Cm055510.1, Cm205460.1, Cm206940.1, Cm206950.1, Cm206970.1, Cm252580.1, Cm252610.1, Cm279170.1, Cm295240.1, Cm310520.1, Cm315180.1, Cm321780.1	Cs_ont_2g022380.1, Cs_ont_2g023020.1, Cs_ont_3g007150.1, Cs_ont_3g007160.1, Cs_ont_3g007170.1, Cs_ont_3g013110.1, Cs_ont_4g016600.1, Cs_ont_4g016620.1, Cs_ont_4g016630.1, Cs_ont_5g019260.1, Cs_ont_5g036260.1, Cs_ont_5g044930.1	SYT004930.1, SYT045010.1, SYT045020.1, SYT045040.1, SYT045050.1, SYT045300.1, SYT082020.1, SYT095120.1, SYT103060.1, SYT185710.1, SYT185740.1, SYT200930.1, SYT201910.1, SYT201920.1, SYT201930.1, SYT201940.1, SYT201960.1, SYT219440.1, SYT225890.1, SYT253450.1, SYT253460.1	Cic077500.1, Cic077530.1, Cic077700.1, Cic080370.1, Cic206890.1, Cic206900.1	Pt1g013120.1, Pt1g013140.1, Pt2g010750.1, Pt2g010940.1, Pt3g004700.1, Pt3g013570.1, Pt3g023470.1, Pt5g006310.1, Pt5g006330.1	H1Y08852.1, H1Y08853.1, H1Y08953.1, H1Y08966.1, H1Y11469.1, H1Y11470.1, H1Y11473.1, H1Y11474.1, H1Y18186.1, H1Y18194.1, H1Y18197.1, H1Y21920.1, H1Y21921.1, H1Y24775.1, H1Y25845.1	H2Y00541.1, H2Y00542.1, H2Y08383.1, H2Y08384.1, H2Y08481.1, H2Y11174.1, H2Y11175.1, H2Y11178.1, H2Y11179.1, H2Y17808.1, H2Y17814.1, H2Y17819.1, H2Y17831.1, H2Y17833.1, H2Y17844.1, H2Y17848.1, H2Y17867.1, H2Y17868.1, H2Y25583.1, H2Y25584.1
OG0012690		OG0000058	Aeg059740.1, Aeg083650.1, Aeg161960.1, Aeg233160.1	Egl007340.1, Egl038620.1, Egl039040.1, Egl047820.1, Egl113940.1, Egl114710.1, Egl125630.1, Egl130460.1, Egl187250.1, Egl207570.1, Egl208670.1, Egl230090.1, Egl298440.1, Egl298450.1, Egl300460.1, Egl300500.1	Citropsis002540.1, Citropsis015520.1, Citropsis018140.1, Citropsis026220.1, Citropsis067640.1, Citropsis097430.1, Citropsis169980.1, Citropsis172770.1, Citropsis198830.1, Citropsis202920.1, Citropsis211460.1, Citropsis271690.1	CP1g000294.t1, CP2g003834.t1, CP3g000834.t1, CP3g002155.t1, CP3g002156.t1, CP3g004028.t1, CP3g004029.t1, CP4g000207.t1, CP4g002014.t1, CP5g001914.t1, CP5g003925.t1, CP5g004540.t1, CP5g005754.t1, CP6g002058.t1, CP6g002448.t1, CP6g002596.t1, CP7g001228.t1, CP8g000551.t1, CP9g001321.t1, CP9g002386.t1		Fh1g06620.1, Fh1g15710.1, Fh1g17640.1, Fh1g27510.1, Fh1g28050.1, Fh1g31110.1, Fh2g02180.1, Fh2g06340.1, Fh2g07510.1, Fh2g12340.1, Fh2g12840.1, Fh2g14850.1, Fh2g16060.1, Fh2g26020.1, Fh2g29280.1, Fh3g00930.1, Fh3g02850.1, Fh3g03810.1, Fh3g18030.1, Fh3g28640.1, Fh4g06260.1, Fh4g12070.1, Fh4g13790.1, Fh4g22170.1, Fh4g22830.1, Fh5g07550.1, Fh5g20200.1, Fh5g30420.1, Fh5g33370.1, Fh6g00210.1, Fh6g02930…	Chh030110.1, Chh108130.1, Chh195800.1	Abu3g_004680.1, Abu4g_010560.1, Abu4g_013590.1	HP006950.1, HP007240.1, HP008400.1, HP024770.1, HP045120.1, HP070310.1, HP105420.1, HP125400.1, HP132600.1, HP158380.1, HP160430.1, HP212710.1, HP239690.1, HP276420.1	Cg2g027430.1, Cg3g010010.1		JLX024460.1, JLX095560.1, JLX174310.1	LW017990.1, LW018250.1, LW097300.1, LW105940.1, LW131970.1, LW133210.1, LW151580.1, LW154410.1, LW166190.1, LW222420.1, LW229020.1, LW229030.1, LW240250.1, LW268000.1, LW269600.1	Cms073760.1		Cs_ont_5g027270.1, Cs_ont_6g024370.1		Cic182160.1, Cic274480.1, Cic294950.1		H1Y01088.1, H1Y02538.1, H1Y02907.1, H1Y03976.1, H1Y08581.1, H1Y08776.1, H1Y10385.1, H1Y13046.1, H1Y15663.1, H1Y17430.1, H1Y17845.1, H1Y18310.1, H1Y19428.1, H1Y20780.1, H1Y23301.1, H1Y23926.1, H1Y25075.1, H1Y25342.1, H1Y25611.1, H1Y25620.1, H1Y28117.1, H1Y29337.1, H1Y31217.1, H1Y31700.1, H1Y34641.1, H1Y36595.1, H1Y37530.1, H1Y40887.1	H2Y02473.1, H2Y02648.1, H2Y02773.1, H2Y03209.1, H2Y03558.1, H2Y04700.1, H2Y08254.1, H2Y09778.1, H2Y10939.1, H2Y14179.1, H2Y16817.1, H2Y21384.1, H2Y23060.1, H2Y24534.1, H2Y25349.1, H2Y28549.1, H2Y29247.1, H2Y31372.1, H2Y31437.1, H2Y31769.1, H2Y31774.1, H2Y32334.1, H2Y33694.1, H2Y35888.1, H2Y35957.1, H2Y36188.1, H2Y36303.1, H2Y37752.1, H2Y38242.1, H2Y38311.1, H2Y38459.1, H2Y40203.1, H2Y41679.1, H2Y…
OG0012691		OG0000059			Citropsis038210.1, Citropsis038250.1, Citropsis038270.1, Citropsis038290.1, Citropsis038300.1, Citropsis038320.1, Citropsis039870.1, Citropsis039880.1, Citropsis039890.1, Citropsis039930.1, Citropsis039980.1, Citropsis039990.1, Citropsis066590.1, Citropsis145090.1, Citropsis272080.1	CP2g003673.t1, CP2g003681.t1, CP2g003685.t1, CP2g003687.t1, CP2g003688.t1, CP2g003689.t1, CP2g003694.t1, CP2g003698.t1, CP2g003699.t1, CP2g003702.t1, CP2g003705.t1, CP2g003706.t1, CP2g003956.t1, CP2g003957.t1, CP2g003959.t1, CP2g003960.t1, CP2g003965.t1, CP2g003966.t1, CP2g003967.t1, CP2g003971.t1, CP2g003972.t1, CP5g003978.t1, CP5g003984.t1	Ciclev10015107m.1, Ciclev10015137m.1, Ciclev10015308m.1, Ciclev10015310m.1, Ciclev10015337m.1, Ciclev10015339m.1, Ciclev10015342m.1, Ciclev10015351m.1, Ciclev10015352m.1, Ciclev10015398m.1, Ciclev10015439m.1, Ciclev10015442m.1, Ciclev10015467m.1, Ciclev10015684m.1, Ciclev10017497m.1, Ciclev10017530m.1, Ciclev10017651m.1, Ciclev10017663m.1, Ciclev10017681m.1, Ciclev10017796m.1, Ciclev10017831m.1, …	Fh2g01260.1, Fh2g01270.1, Fh2g01280.1, Fh2g01290.1, Fh2g03210.1, Fh2g03220.1, Fh2g03230.1, Fh2g03270.1, Fh2g03310.1, Fh2g03320.1, Fh2g03340.1, Fh2g03360.1, Fh2g03390.1, Fh2g03420.1, Fh5g15820.1			HP040640.1, HP064500.1, HP092700.1	Cg2g001140.1, Cg2g001180.1, Cg2g001210.1, Cg2g001220.1, Cg2g001230.1, Cg2g002840.1, Cg2g002850.1, Cg2g002860.1, Cg2g002900.1, Cg2g002910.1, Cg2g002930.1, Cg2g002950.1, Cg2g002970.1, Cg2g002990.1, Cg2g003000.1, Cg2g003020.1, Cg7g007760.1		JLX199920.1, JLX200290.1, JLX200550.1, JLX200740.1, JLX201270.1, JLX201900.1, JLX202030.1, JLX202330.1, JLX202840.1, JLX204100.1	LW097870.1, LW239070.1, LW239130.1, LW239150.1, LW239170.1, LW239200.1, LW239210.1, LW239220.1, LW239280.1, LW239300.1, LW239310.1, LW240800.1, LW240820.1, LW240830.1, LW240860.1, LW240870.1, LW240880.1, LW240890.1	Cms115670.1, Cms166440.1, Cms169360.1, Cms169400.1, Cms169420.1, Cms169430.1, Cms169450.1, Cms169470.1, Cms203150.1, Cms203210.1, Cms203220.1, Cms203240.1, Cms203260.1, Cms203280.1, Cms203290.1, Cms203300.1, Cms203320.1, Cms203330.1, Cms203340.1	Cm029780.1, Cm030260.1, Cm030280.1, Cm030300.1, Cm030310.1, Cm030340.1, Cm030360.1, Cm030370.1, Cm223120.1, Cm223130.1, Cm223150.1, Cm223160.1, Cm223180.1, Cm223200.1, Cm223210.1, Cm223230.1, Cm223240.1, Cm235040.1, Cm235060.1, Cm235080.1, Cm235100.1, Cm235120.1, Cm235200.1, Cm256760.1, Cm256790.1, Cm256800.1, Cm256810.1, Cm256840.1, Cm256910.1, Cm256920.1, Cm256930.1, Cm296840.1, Cm296860.1, Cm2…		SYT000860.1, SYT000870.1, SYT018650.1, SYT018690.1, SYT025780.1		Pt2g001150.1, Pt2g001160.1, Pt2g001180.1, Pt2g001190.1, Pt2g001200.1, Pt2g001210.1, Pt2g003420.1, Pt2g003430.1, Pt2g003440.1, Pt2g003460.1, Pt2g003470.1, Pt2g003500.1, Pt2g003510.1, Pt2g003520.1, Pt3g014360.1	H1Y10472.1, H1Y10508.1	H2Y09869.1, H2Y10109.1
OG0012692		OG0000060	Aeg178980.1	Egl013320.1, Egl035460.1, Egl035470.1	Citropsis010110.1, Citropsis081160.1, Citropsis169990.1, Citropsis261940.1, Citropsis272690.1	CP1g000427.t1, CP1g000434.t1, CP1g000436.t1, CP1g000594.t1, CP1g001896.t1, CP2g001491.t1, CP2g002929.t1, CP3g003164.t1, CP4g001722.t1, CP4g001723.t1, CP4g002026.t1, CP4g002246.t1, CP6g002617.t1, CP6g002812.t1, CP7g000225.t1, CP7g000496.t1, CP7g001157.t1, CP7g001861.t1, CP7g002017.t1, CP8g001417.t1, CP8g001712.t1, CP8g002265.t1, CP9g001617.t1		Fh1g14470.1, Fh1g28200.1, Fh1g28210.1, Fh2g07820.1, Fh2g18010.1, Fh3g10720.1, Fh4g11970.1, Fh5g12730.1, Fh5g40310.1, Fh6g02750.1, Fh7g12920.1, Fh7g14420.1, Fh7g21790.1, Fh8g03030.1, Fh8g12120.1, Fh9g10090.1, Fh9g16060.1	Chh108070.1	Abu6g_022200.1, Abu7g_008210.1	HP127330.1, HP136250.1, HP241050.1, HP261730.1	Cg1g016690.1, Cg1g025240.1, Cg1g026680.1, Cg2g006550.1, Cg2g007240.1, Cg2g026580.1, Cg2g029560.1, Cg3g003230.1, Cg3g007100.1, Cg5g014850.1, Cg5g016840.1, Cg5g018110.1, Cg5g027470.1, Cg6g000640.1, Cg7g004830.1, Cg7g010800.1, Cg7g024010.1, Cg8g011770.1, Cg9g014530.1, Cg9g015080.1, Cg9g015280.1, Cg9g016280.1, Cg9g019730.1, CgUng001460.1	Cmt111860.1	JLX034200.1	LW100280.1	Cms281200.1	Cm028660.1, Cm044880.1, Cm055600.1, Cm057580.1, Cm071430.1, Cm076180.1, Cm081150.1, Cm108960.1, Cm114070.1, Cm140280.1, Cm140700.1, Cm141560.1, Cm156240.1, Cm158260.1, Cm159780.1, Cm175470.1, Cm184680.1, Cm215650.1, Cm215660.1, Cm220140.1, Cm258650.1, Cm258660.1, Cm258930.1, Cm263130.1, Cm271160.1, Cm274650.1, Cm298440.1		SYT139340.1	Cic000390.1, Cic002810.1, Cic027170.1, Cic044950.1, Cic053610.1, Cic053630.1, Cic053700.1, Cic068860.1, Cic070160.1, Cic089100.1, Cic090640.1, Cic166140.1, Cic173300.1, Cic178710.1, Cic185100.1, Cic190410.1, Cic190880.1, Cic226280.1, Cic227020.1, Cic268170.1, Cic274120.1, Cic281240.1, Cic287410.1, Cic295390.1	Pt1g008160.1, Pt1g009630.1, Pt2g006940.1, Pt2g007550.1, Pt3g007730.1, Pt4g004110.1, Pt4g009920.1, Pt4g017140.1, Pt4g019540.1, Pt5g020240.1, Pt7g008750.1, Pt8g002640.1, PtUn003650.1, PtUn025070.1, PtUn025080.1, PtUn025100.1, PtUn032220.1	H1Y02479.1, H1Y02490.1, H1Y02501.1, H1Y02503.1, H1Y04067.1, H1Y07475.1, H1Y09389.1, H1Y09694.1, H1Y09698.1, H1Y13541.1, H1Y13821.1, H1Y14224.1, H1Y17330.1, H1Y17824.1, H1Y20900.1, H1Y26690.1, H1Y29502.1, H1Y29792.1, H1Y30445.1, H1Y31921.1, H1Y32666.1, H1Y33410.1, H1Y33676.1, H1Y35092.1, H1Y35850.1, H1Y36243.1, H1Y39354.1, H1Y40084.1	H2Y01985.1, H2Y01987.1, H2Y02199.1, H2Y02914.1, H2Y03019.1, H2Y03667.1, H2Y06433.1, H2Y09220.1, H2Y09314.1, H2Y13807.1, H2Y16799.1, H2Y20499.1, H2Y28883.1, H2Y29211.1, H2Y30213.1, H2Y31382.1, H2Y31567.1, H2Y32283.1, H2Y32998.1, H2Y34728.1, H2Y34997.1, H2Y35576.1, H2Y36014.1, H2Y39289.1, H2Y40225.1
OG0012694		OG0000061	Aeg028690.1, Aeg051940.1, Aeg206750.1, Aeg206860.1	Egl011830.1, Egl054710.1, Egl057090.1, Egl105550.1, Egl108730.1, Egl108760.1, Egl129570.1, Egl194400.1, Egl194510.1, Egl196840.1, Egl196960.1, Egl227970.1, Egl241320.1, Egl256640.1, Egl256710.1, Egl256780.1, Egl258020.1, Egl298870.1, Egl307790.1	Citropsis044590.1, Citropsis044690.1, Citropsis055210.1, Citropsis078220.1, Citropsis081010.1, Citropsis099690.1, Citropsis101970.1, Citropsis135610.1, Citropsis158890.1, Citropsis173450.1, Citropsis188680.1, Citropsis274100.1	CP2g002615.t1, CP5g003322.t1, CP6g001914.t1, CP6g002375.t1, CP7g000996.t1, CP8g002589.t1, CP8g003028.t1, CP8g003039.t1	Ciclev10013076m.1, Ciclev10013317m.1, Ciclev10013909m.1, Ciclev10017697m.1, Ciclev10023876m.1, Ciclev10029263m.1, Ciclev10029539m.1, Ciclev10033445m.1, Ciclev10033670m.1	Fh2g10400.1, Fh6g04730.1, Fh6g09950.1, Fh7g27070.1, Fh8g10350.1, Fh8g26980.1, Fh8g27090.1	Chh038570.1, Chh045460.1, Chh046740.1, Chh083570.1, Chh102230.1, Chh189210.1, Chh232630.1, Chh243820.1, Chh243960.1, Chh250540.1, Chh250650.1, Chh268820.1, Chh269890.1	Abu2g_013260.1, Abu3g_001120.1, Abu4g_004400.1, Abu4g_023530.1, Abu5g_012520.1, Abu6g_016640.1, Abu6g_019600.1, Abu7g_010000.1, Abu8g_010170.1, Abu8g_010310.1	HP014040.1, HP132610.1, HP157850.1, HP273990.1, HP274140.1	Cg1g011590.1, Cg2g012150.1, Cg2g012830.1, Cg2g021490.1, Cg5g019920.1, Cg5g020280.1, Cg6g004010.1, Cg7g017200.1, Cg7g018260.1, Cg8g021820.1, Cg8g021930.1, Cg9g002920.1, Cg9g004860.1	Cmt051050.1, Cmt156120.1	JLX067020.1, JLX120420.1, JLX123890.1, JLX173490.1, JLX175530.1	LW037360.1, LW047570.1, LW081500.1, LW081620.1, LW089330.1, LW090510.1, LW118500.1, LW163930.1, LW250220.1	Cms068520.1, Cms073460.1, Cms117750.1, Cms195510.1, Cms195640.1, Cms216690.1, Cms217500.1, Cms230860.1	Cm052710.1, Cm059550.1, Cm068580.1, Cm072850.1, Cm098360.1, Cm134710.1, Cm157880.1, Cm166410.1, Cm175600.1, Cm179010.1, Cm179110.1, Cm193370.1, Cm266760.1	Cs_ont_5g028610.1, Cs_ont_5g029970.1, Cs_ont_5g041090.1, Cs_ont_6g018020.1, Cs_ont_6g022410.1, Cs_ont_7g009160.1, Cs_ont_7g019920.1, Cs_ont_7g023470.1, Cs_ont_8g003130.1, Cs_ont_8g003270.1, Cs_ont_8g007050.1, Cs_ont_8g012590.1, Cs_ont_8g024240.1	SYT077780.1, SYT102090.1, SYT141200.1, SYT159230.1, SYT196150.1, SYT196250.1, SYT227910.1	Cic062800.1, Cic105650.1, Cic105770.1, Cic117830.1, Cic140030.1, Cic143220.1, Cic167540.1, Cic183390.1, Cic183460.1, Cic253610.1, Cic254640.1	Pt4g006110.1, Pt5g018920.1, Pt6g015910.1, Pt6g018510.1, Pt6g018890.1, Pt8g009650.1, Pt8g009770.1, Pt9g016360.1, PtUn030450.1	H1Y23519.1, H1Y28582.1, H1Y29243.1, H1Y31250.1, H1Y32835.1, H1Y33242.1, H1Y34280.1, H1Y34293.1, H1Y37107.1, H1Y37131.1	H2Y08327.1, H2Y08495.1, H2Y17512.1, H2Y23249.1, H2Y23488.1, H2Y28366.1, H2Y28979.1, H2Y30910.1, H2Y32718.1, H2Y32840.1, H2Y33854.1, H2Y33867.1, H2Y35130.1, H2Y37068.1, H2Y38015.1, H2Y38263.1
OG0012696		OG0000062	Aeg033910.1, Aeg147250.1, Aeg147280.1, Aeg223070.1	Egl013810.1, Egl055790.1, Egl225850.1, Egl246200.1, Egl299780.1, Egl301380.1	Citropsis150830.1, Citropsis150860.1, Citropsis150880.1, Citropsis150890.1, Citropsis160520.1	CP3g003583.t1, CP5g000555.t1, CP5g000556.t1, CP5g001800.t1, CP5g003036.t1, CP5g003037.t1, CP5g003043.t1, CP5g003051.t1, CP5g003054.t1, CP5g003056.t1, CP5g003059.t1, CP5g003060.t1, CP5g003063.t1, CP5g003070.t1, CP5g003077.t1, CP5g003240.t1, CP7g002689.t1, CP7g002704.t1, CP7g002708.t1, CP7g002716.t1	Ciclev10001661m.1, Ciclev10010860m.1, Ciclev10020782m.1, Ciclev10020818m.1, Ciclev10020870m.1, Ciclev10020873m.1, Ciclev10020874m.1, Ciclev10020875m.1, Ciclev10020880m.1, Ciclev10023568m.1, Ciclev10023965m.1, Ciclev10023994m.1, Ciclev10024372m.1, Ciclev10024389m.1, Ciclev10031949m.1, Ciclev10031951m.1, Ciclev10031952m.1, Ciclev10031953m.1, Ciclev10032027m.1, Ciclev10032452m.1, Ciclev10032453m.1, …	Fh3g07320.1, Fh5g23220.1, Fh5g23240.1, Fh5g24260.1, Fh5g24310.1, Fh5g24340.1, Fh5g24380.1, Fh5g24440.1, Fh5g26620.1, Fh5g32920.1, Fh5g44410.1, Fh5g44420.1, Fh7g05700.1, Fh7g05800.1, Fh7g05890.1, Fh7g05920.1	Chh029430.1, Chh104240.1	Abu2g_027440.1	HP002280.1, HP235310.1			JLX004370.1, JLX070120.1, JLX161900.1, JLX162520.1, JLX162700.1, JLX188380.1, JLX188510.1, JLX199800.1	LW036790.1, LW073490.1, LW074710.1, LW105250.1, LW106280.1, LW106300.1, LW106320.1, LW106340.1, LW106380.1, LW106400.1, LW106460.1, LW106490.1, LW106520.1, LW114480.1, LW114490.1, LW114500.1, LW126130.1, LW126140.1, LW160530.1, LW160600.1, LW160640.1, LW160720.1, LW160740.1, LW160900.1, LW160920.1, LW161030.1, LW242330.1, LW242420.1, LW242490.1	Cms082410.1, Cms114490.1, Cms184170.1		Cs_ont_5g017430.1, Cs_ont_5g026850.1	SYT143920.1, SYT173790.1, SYT173810.1, SYT174420.1, SYT186530.1, SYT248000.1, SYT248010.1	Cic066520.1, Cic090730.1, Cic090770.1, Cic091050.1, Cic181850.1, Cic181860.1, Cic181900.1, Cic182880.1	Pt3g000060.1, Pt3g000080.1, Pt3g018450.1, Pt3g019020.1, Pt3g019040.1, Pt3g019060.1, Pt3g025560.1, Pt3g034460.1, Pt3g034470.1, Pt4g017220.1, PtUn026750.1, PtUn026770.1, PtUn029250.1, PtUn034040.1, PtUn034890.1	H1Y14738.1, H1Y20324.1, H1Y20325.1, H1Y21678.1, H1Y21682.1, H1Y23179.1, H1Y23183.1, H1Y23203.1, H1Y23205.1, H1Y23208.1, H1Y23212.1, H1Y23218.1, H1Y23223.1, H1Y23229.1, H1Y23233.1, H1Y23421.1, H1Y30702.1, H1Y30716.1, H1Y30718.1, H1Y30730.1	H2Y20019.1, H2Y20020.1, H2Y21382.1, H2Y21386.1, H2Y21390.1, H2Y22527.1, H2Y22528.1, H2Y22954.1, H2Y22960.1, H2Y22964.1, H2Y22968.1, H2Y22970.1, H2Y22973.1, H2Y22976.1, H2Y22977.1, H2Y22982.1, H2Y22989.1, H2Y22993.1, H2Y23000.1, H2Y23007.1, H2Y23010.1, H2Y23184.1, H2Y30423.1, H2Y30432.1, H2Y30438.1
OG0012698		OG0000063		Egl018970.1	Citropsis065120.1, Citropsis065220.1, Citropsis065710.1, Citropsis065720.1, Citropsis065730.1, Citropsis081490.1, Citropsis090690.1, Citropsis231050.1, Citropsis260990.1	CP1g000981.t1, CP1g000982.t1, CP1g000983.t1, CP1g000988.t1, CP1g000989.t1, CP3g002284.t1, CP3g002326.t1, CP3g002330.t1, CP3g002331.t1, CP3g002336.t1, CP3g002338.t1, CP3g002339.t1, CP3g002347.t1, CP3g002349.t1, CP3g002350.t1, CP3g002353.t1, CP3g002355.t1, CP3g002357.t1, CP3g002364.t1, CP3g002367.t1, CP3g003133.t1, CP5g003966.t1, CP6g002594.t1, CP6g002600.t1, CP8g002405.t1, CP8g002419.t1, CP8g00242…	Ciclev10000397m.1, Ciclev10002613m.1, Ciclev10002829m.1, Ciclev10002872m.1, Ciclev10003271m.1, Ciclev10003464m.1, Ciclev10003682m.1, Ciclev10004045m.1, Ciclev10004069m.1, Ciclev10004096m.1, Ciclev10006923m.1, Ciclev10013923m.1, Ciclev10030320m.1	Fh3g16960.1, Fh3g16980.1, Fh3g17170.1, Fh3g17210.1, Fh3g17240.1, Fh3g17270.1, Fh3g17310.1, Fh3g17340.1, Fh3g17380.1, Fh3g17480.1, Fh3g17520.1, Fh3g17590.1, Fh3g17620.1, Fh3g17730.1, Fh3g17770.1, Fh3g17780.1, Fh3g17820.1, Fh3g18230.1, Fh5g15960.1, Fh5g26480.1, Fh6g02920.1, Fh8g21680.1, Fh8g21700.1, Fh8g21740.1, Fh9g09420.1, FhUn04830.1, FhUn04920.1, FhUn04950.1		Abu3g_009140.1, Abu6g_020710.1, Abu8g_006020.1, Abu8g_006030.1, Abu9g_009430.1, Abu9g_015660.1	HP048440.1, HP148710.1, HP148720.1, HP227290.1, HP251100.1, HP267100.1				LW108300.1, LW265560.1		Cm057410.1, Cm106050.1, Cm106240.1, Cm106270.1, Cm106290.1, Cm112980.1, Cm127540.1, Cm127550.1, Cm169350.1, Cm179520.1, Cm179550.1, Cm238220.1, Cm240860.1, Cm240890.1, Cm240900.1, Cm248120.1, Cm248140.1, Cm289650.1, Cm290630.1, Cm297400.1, Cm313600.1		SYT000570.1, SYT004350.1, SYT017700.1, SYT041090.1, SYT043030.1, SYT046880.1, SYT053090.1, SYT053120.1, SYT053150.1, SYT069430.1, SYT181880.1, SYT210710.1, SYT213340.1, SYT220870.1	Cic035220.1, Cic035900.1, Cic110570.1, Cic110590.1, Cic118370.1	Pt5g016300.1, Pt5g016310.1, Pt5g017170.1, Pt5g017260.1, Pt5g017300.1, Pt5g017330.1, Pt5g017360.1, Pt5g017450.1, Pt5g020480.1, Pt6g018780.1, Pt8g005430.1, Pt8g005460.1, Pt8g005480.1, Pt8g005490.1, Pt8g005510.1, PtUn002730.1, PtUn012720.1, PtUn012750.1, PtUn012800.1, PtUn012830.1, PtUn012850.1, PtUn012890.1, PtUn012930.1	H1Y13244.1, H1Y13246.1, H1Y13252.1, H1Y13253.1, H1Y13263.1, H1Y13264.1, H1Y13265.1, H1Y13269.1, H1Y13275.1, H1Y13278.1, H1Y34898.1, H1Y34903.1, H1Y34910.1, H1Y34914.1, H1Y34918.1, H1Y34922.1, H1Y34925.1, H1Y34932.1, H1Y34934.1, H1Y34938.1, H1Y38969.1, H1Y40719.1	H2Y00621.1, H2Y02722.1, H2Y12770.1, H2Y12811.1, H2Y12818.1, H2Y12824.1, H2Y12833.1, H2Y12839.1, H2Y12860.1, H2Y24250.1, H2Y34484.1, H2Y34489.1, H2Y34492.1, H2Y34494.1, H2Y40746.1, H2Y40756.1
OG0012699		OG0000064									HP000080.1, HP000090.1, HP000170.1, HP000220.1, HP000310.1, HP000640.1, HP014110.1, HP014180.1, HP014470.1, HP014650.1, HP014710.1, HP014750.1, HP014760.1, HP015190.1, HP015200.1, HP015230.1, HP015260.1, HP015270.1, HP015310.1, HP015320.1, HP016430.1, HP016730.1, HP036210.1, HP036250.1, HP036260.1, HP036290.1, HP036320.1, HP047020.1, HP049800.1, HP050030.1, HP050040.1, HP050130.1, HP050260.1, HP0…												H2Y40180.1
OG0012700		OG0000065	Aeg258090.1	Egl098430.1, Egl127460.1, Egl127620.1, Egl127880.1, Egl132300.1, Egl166730.1, Egl203850.1, Egl222810.1, Egl224120.1, Egl238580.1, Egl274070.1, Egl292430.1, Egl298460.1, Egl303240.1	Citropsis025610.1, Citropsis054780.1, Citropsis113040.1, Citropsis138790.1, Citropsis173770.1, Citropsis174570.1, Citropsis243630.1, Citropsis266660.1, Citropsis275590.1	CP1g000547.t1, CP1g000739.t1, CP1g001969.t1, CP1g002042.t1, CP1g002984.t1, CP2g000458.t1, CP2g001624.t1, CP2g003559.t1, CP3g003452.t1, CP5g001575.t1, CP5g002415.t1, CP5g004844.t1, CP5g004845.t1, CP6g002150.t1, CP6g002405.t1, CP8g002650.t1, CP8g002916.t1, CP9g002064.t1		Fh2g22550.1, Fh3g04440.1, Fh3g08380.1, Fh6g14850.1, Fh7g17340.1, Fh7g22380.1, Fh9g20090.1, FhUn03490.1, FhUn03910.1	Chh035020.1, Chh035030.1, Chh041660.1, Chh062410.1, Chh092650.1, Chh105290.1, Chh226480.1, Chh235320.1, Chh280990.1, Chh281180.1, Chh284780.1	Abu1g_020650.1, Abu1g_020660.1, Abu2g_007990.1, Abu7g_011390.1, Abu7g_014570.1, Abu8g_012370.1	HP131130.1, HP286960.1	Cg2g000640.1, Cg3g004430.1, Cg5g014810.1, Cg7g001620.1, Cg7g007670.1, Cg7g015240.1, Cg9g020210.1, Cg9g020220.1, Cg9g020510.1	Cmt018570.1, Cmt037440.1, Cmt047120.1, Cmt071460.1, Cmt108360.1, Cmt109540.1, Cmt134710.1, Cmt134720.1, Cmt142840.1, Cmt144610.1, Cmt261270.1, Cmt261290.1		LW025440.1, LW047470.1, LW074500.1, LW074510.1, LW082870.1, LW140300.1, LW169860.1, LW182580.1, LW201770.1, LW220260.1, LW221230.1, LW221240.1, LW258790.1, LW258800.1, LW273330.1, LW286120.1, LW309020.1	Cms045120.1, Cms069630.1, Cms071930.1, Cms071940.1, Cms071950.1, Cms089850.1, Cms097650.1, Cms179880.1, Cms216920.1, Cms238370.1, Cms258830.1, Cms282800.1	Cm091140.1, Cm096900.1, Cm108060.1, Cm108070.1, Cm126880.1, Cm136720.1, Cm199600.1, Cm217330.1, Cm222580.1, Cm240030.1, Cm252100.1, Cm299760.1	Cs_ont_1g004470.1, Cs_ont_1g005900.1, Cs_ont_1g016390.1, Cs_ont_1g024400.1, Cs_ont_2g031740.1, Cs_ont_3g025250.1, Cs_ont_4g028660.1, Cs_ont_5g022380.1, Cs_ont_5g031880.1, Cs_ont_5g034390.1, Cs_ont_6g016470.1, Cs_ont_6g020120.1, Cs_ont_6g022650.1, Cs_ont_7g006790.1, Cs_ont_7g008750.1, Cs_ont_8g004400.1, Cs_ont_8g006750.1, Cs_ont_8g010230.1, Cs_ont_8g018660.1		Cic026120.1, Cic035310.1, Cic067380.1, Cic117760.1	Pt2g009880.1, Pt5g014820.1, Pt5g021140.1, Pt6g019930.1, Pt7g009990.1, PtUn012820.1	H1Y02651.1, H1Y02878.1, H1Y04236.1, H1Y06385.1, H1Y10118.1, H1Y14555.1, H1Y22368.1, H1Y24981.1, H1Y28886.1, H1Y29283.1, H1Y30832.1, H1Y31191.1, H1Y31720.1, H1Y34419.1, H1Y34710.1, H1Y34711.1, H1Y36613.1, H1Y40835.1	H2Y03739.1, H2Y03889.1, H2Y09712.1, H2Y10203.1, H2Y14069.1, H2Y14070.1, H2Y21734.1, H2Y22191.1, H2Y22514.1, H2Y23530.1, H2Y24242.1, H2Y31387.1, H2Y31894.1, H2Y32482.1, H2Y40890.1, H2Y41838.1, H2Y42035.1
OG0012701		OG0000066	Aeg005430.1, Aeg053340.1, Aeg053350.1, Aeg053360.1, Aeg083960.1, Aeg083970.1, Aeg140580.1, Aeg165620.1, Aeg206550.1, Aeg206560.1	Egl012140.1, Egl012150.1, Egl067120.1, Egl182930.1, Egl196570.1, Egl196580.1, Egl245680.1, Egl254010.1, Egl254020.1, Egl315720.1	Citropsis044290.1, Citropsis044300.1, Citropsis064750.1, Citropsis064760.1, Citropsis085870.1, Citropsis085880.1, Citropsis149050.1, Citropsis158200.1, Citropsis161100.1, Citropsis194080.1, Citropsis256840.1	CP3g002163.t1, CP3g003743.t1, CP5g001756.t1, CP7g003363.t1, CP7g003364.t1, CP8g003068.t1, CP8g003069.t1, CP9g002719.t1, CP9g002721.t1	Ciclev10001065m.1, Ciclev10003724m.1, Ciclev10004935m.1, Ciclev10020064m.1, Ciclev10028392m.1, Ciclev10030245m.1, Ciclev10030803m.1, Ciclev10030812m.1	Fh3g05800.1, Fh3g19560.1, Fh5g33420.1, Fh7g00370.1, Fh7g00380.1, Fh8g27350.1, Fh8g27360.1, Fh9g25060.1, Fh9g25070.1	Chh060800.1, Chh103680.1, Chh153350.1, Chh235200.1, Chh243560.1, Chh243570.1, Chh278880.1, Chh278890.1, Chh298530.1, Chh299700.1, Chh299710.1	Abu3g_003000.1, Abu3g_003010.1, Abu3g_009960.1, Abu5g_016040.1, Abu7g_000510.1, Abu7g_000520.1, Abu8g_010520.1, Abu8g_010530.1, Abu9g_019880.1, Abu9g_019890.1	HP009220.1, HP053830.1, HP066250.1, HP071430.1, HP114790.1, HP114800.1, HP151290.1, HP151300.1, HP273770.1	Cg3g000970.1, Cg3g000980.1, Cg3g011250.1, Cg5g028990.1, Cg7g000350.1, Cg7g000360.1, Cg8g022200.1, Cg8g022210.1, Cg9g016740.1, Cg9g016910.1, Cg9g026130.1, Cg9g026140.1, CgUng021440.1	Cmt000370.1, Cmt000380.1, Cmt051320.1, Cmt051330.1, Cmt052070.1, Cmt052090.1, Cmt085320.1, Cmt115980.1, Cmt139170.1, Cmt139180.1, Cmt144450.1, Cmt144570.1	JLX005700.1, JLX128140.1, JLX177010.1, JLX179110.1, JLX213340.1, JLX214020.1	LW069530.1, LW072350.1, LW081230.1, LW081240.1, LW115040.1, LW224840.1, LW224850.1, LW244880.1, LW244890.1, LW269520.1	Cms043050.1, Cms043060.1, Cms160260.1, Cms162600.1, Cms162630.1, Cms185990.1, Cms186020.1, Cms191820.1, Cms191830.1, Cms195260.1, Cms195270.1, Cms215160.1	Cm098050.1, Cm168270.1, Cm168280.1, Cm181800.1, Cm192050.1, Cm197230.1, Cm244870.1, Cm292250.1	Cs_ont_3g018970.1, Cs_ont_5g016880.1, Cs_ont_9g024960.1		Cic065450.1, Cic070600.1, Cic085410.1, Cic105430.1, Cic105440.1, Cic161470.1, Cic161480.1, Cic216800.1, Cic220900.1	Pt3g026520.1, Pt4g022850.1, Pt5g015140.1, Pt5g020960.1, Pt5g020970.1, Pt8g010010.1, Pt8g010020.1, Pt9g020660.1, Pt9g020670.1	H1Y13054.1, H1Y13055.1, H1Y14974.1, H1Y21626.1, H1Y29976.1, H1Y29977.1, H1Y34250.1, H1Y34252.1, H1Y40375.1, H1Y41637.1, H1Y41639.1	H2Y01439.1, H2Y01440.1, H2Y12645.1, H2Y14511.1, H2Y14512.1, H2Y21319.1, H2Y33824.1, H2Y33826.1, H2Y40327.1, H2Y40368.1, H2Y41605.1, H2Y41607.1
OG0012702		OG0000067		Egl067300.1	Citropsis082180.1, Citropsis082230.1, Citropsis082250.1, Citropsis154570.1, Citropsis156100.1, Citropsis156180.1, Citropsis156200.1, Citropsis167830.1	CP1g000661.t1, CP1g000665.t1, CP1g000677.t1, CP1g000678.t1, CP1g002178.t1, CP3g001693.t1, CP3g001700.t1, CP3g001703.t1, CP3g001706.t1, CP3g001709.t1, CP3g001710.t1, CP3g001716.t1, CP3g001720.t1, CP3g001722.t1, CP3g001725.t1, CP3g001732.t1, CP3g001748.t1, CP3g001761.t1, CP3g003244.t1, CP3g003246.t1, CP3g003247.t1, CP3g003252.t1, CP3g003254.t1, CP3g003255.t1, CP3g003259.t1, CP3g003262.t1, CP3g00326…	Ciclev10002941m.1	Fh1g25380.1, Fh1g30570.1, Fh3g04900.1, Fh3g05870.1, Fh3g09090.1, Fh3g09220.1, Fh3g09280.1, Fh3g09830.1, Fh4g21160.1, FhUn05910.1, FhUn06400.1	Chh105500.1, Chh123320.1			Cg1g023190.1, Cg1g023220.1, Cg1g023290.1, Cg1g023320.1, Cg1g028760.1, Cg1g028820.1, Cg2g024000.1, Cg3g000350.1, Cg3g001060.1, Cg3g003760.1, Cg3g003780.1, Cg3g003790.1, Cg3g003850.1, Cg3g003900.1, Cg3g004180.1, Cg3g005290.1, Cg3g005360.1, Cg9g011890.1, Cg9g011920.1, Cg9g011960.1, Cg9g012020.1		JLX130540.1, JLX149720.1, JLX149730.1, JLX149760.1, JLX149840.1, JLX149870.1, JLX150830.1, JLX216400.1, JLX231560.1	LW050750.1, LW072250.1, LW074850.1, LW224160.1		Cm097920.1, Cm160090.1, Cm175170.1, Cm206540.1, Cm206750.1, Cm233160.1, Cm249220.1, Cm281120.1	Cs_ont_1g005330.1, Cs_ont_1g008840.1, Cs_ont_3g030110.1, Cs_ont_3g030120.1, Cs_ont_3g030180.1, Cs_ont_3g030190.1	SYT055970.1, SYT070960.1, SYT083530.1	Cic065060.1		H1Y02096.1, H1Y02125.1, H1Y02131.1, H1Y02787.1, H1Y02798.1, H1Y02802.1, H1Y04397.1, H1Y12497.1, H1Y12523.1, H1Y12528.1, H1Y12531.1, H1Y12543.1, H1Y12546.1, H1Y12565.1, H1Y12600.1, H1Y14986.1, H1Y15006.1, H1Y15068.1, H1Y15076.1, H1Y15079.1, H1Y15082.1, H1Y15086.1, H1Y15095.1, H1Y15098.1, H1Y15100.1, H1Y15103.1, H1Y15104.1, H1Y15105.1, H1Y15106.1, H1Y15112.1	H2Y01643.1, H2Y01647.1, H2Y01678.1, H2Y02299.1, H2Y02308.1, H2Y02312.1, H2Y02316.1, H2Y04020.1, H2Y12179.1, H2Y12183.1, H2Y12185.1, H2Y12232.1, H2Y13944.1, H2Y14533.1, H2Y14598.1, H2Y14602.1, H2Y14604.1, H2Y14606.1, H2Y14610.1, H2Y40963.1
OG0012703		OG0000068	Aeg119380.1		Citropsis024670.1, Citropsis157990.1	CP2g000715.t1, CP2g001309.t1, CP2g002288.t1, CP2g003544.t1, CP3g001891.t1, CP4g000274.t1, CP5g002224.t1, CP5g005421.t1, CP5g005422.t1, CP7g001419.t1, CP7g001760.t1, CP7g002535.t1		Fh1g09520.1, Fh1g11480.1, Fh1g13050.1, Fh1g16300.1, Fh1g17880.1, Fh1g17890.1, Fh1g17940.1, Fh1g17950.1, Fh1g26160.1, Fh2g02110.1, Fh2g02390.1, Fh2g03100.1, Fh2g14350.1, Fh2g20030.1, Fh2g25410.1, Fh2g30730.1, Fh2g35630.1, Fh2g36790.1, Fh3g00560.1, Fh3g00730.1, Fh3g05280.1, Fh3g07310.1, Fh3g08120.1, Fh3g14350.1, Fh3g15380.1, Fh3g15450.1, Fh3g17710.1, Fh3g19010.1, Fh3g19910.1, Fh3g19990.1, Fh3g21280…	Chh029110.1, Chh043020.1, Chh049300.1, Chh092220.1, Chh123210.1, Chh185080.1, Chh232080.1, Chh254780.1, Chh298450.1	Abu8g_021220.1	HP052620.1				LW249750.1, LW309710.1	Cms163080.1	Cm313060.1	Cs_ont_4g015950.1	SYT000710.1, SYT041640.1, SYT042100.1, SYT042110.1, SYT042120.1, SYT046260.1, SYT082160.1, SYT102390.1, SYT120620.1, SYT154210.1	Cic047920.1, Cic165110.1, Cic262410.1, Cic262460.1, Cic273280.1		H1Y00298.1, H1Y03153.1, H1Y03377.1, H1Y03852.1, H1Y03897.1, H1Y04486.1, H1Y06646.1, H1Y10555.1, H1Y13736.1, H1Y14763.1, H1Y15133.1, H1Y17786.1, H1Y17789.1, H1Y18057.1, H1Y22322.1, H1Y22408.1, H1Y22847.1, H1Y23520.1, H1Y24373.1, H1Y24755.1, H1Y31168.1, H1Y31741.1, H1Y32033.1, H1Y35455.1, H1Y36301.1, H1Y36516.1, H1Y38648.1, H1Y39810.1, H1Y39812.1, H1Y39986.1, H1Y40969.1, H1Y41058.1	H2Y00712.1, H2Y00714.1, H2Y02017.1, H2Y03366.1, H2Y03455.1, H2Y03532.1, H2Y03707.1, H2Y08322.1, H2Y08585.1, H2Y08803.1, H2Y12196.1, H2Y12236.1, H2Y12274.1, H2Y12545.1, H2Y12874.1, H2Y17065.1, H2Y17474.1, H2Y17706.1, H2Y17749.1, H2Y20435.1, H2Y22126.1, H2Y22536.1, H2Y23021.1, H2Y26965.1, H2Y27885.1, H2Y30465.1, H2Y30832.1, H2Y35366.1, H2Y36428.1, H2Y40815.1, H2Y40999.1, H2Y41052.1
OG0012704		OG0000069	Aeg185160.1, Aeg185170.1, Aeg185180.1, Aeg185190.1, Aeg185260.1, Aeg185270.1	Egl145240.1, Egl145250.1, Egl145260.1, Egl145270.1, Egl145280.1, Egl145310.1, Egl145320.1, Egl145330.1, Egl145390.1, Egl145400.1	Citropsis177870.1, Citropsis177880.1, Citropsis177890.1, Citropsis177910.1, Citropsis177970.1, Citropsis177990.1, Citropsis178000.1, Citropsis178010.1, Citropsis178020.1, Citropsis178030.1, Citropsis178040.1	CP5g005378.t1, CP5g005379.t1, CP5g005385.t1, CP5g005389.t1, CP5g005390.t1, CP5g005397.t1, CP5g005398.t1, CP5g005399.t1, CP5g005403.t1, CP5g005404.t1	Ciclev10021951m.1, Ciclev10022110m.1, Ciclev10022128m.1, Ciclev10022136m.1, Ciclev10022138m.1, Ciclev10023877m.1, Ciclev10023942m.1, Ciclev10024460m.1	Fh3g08180.1, Fh5g03800.1, Fh5g03810.1, Fh5g03820.1, Fh5g03840.1, Fh5g03850.1, Fh5g03860.1, Fh5g03870.1, Fh5g03880.1, Fh5g03940.1, Fh5g03950.1	Chh086150.1, Chh086160.1, Chh086240.1, Chh086250.1, Chh086260.1, Chh086280.1, Chh086290.1, Chh086300.1, Chh136840.1, Chh136850.1	Abu5g_042170.1, Abu5g_042240.1, Abu5g_042250.1	HP098930.1, HP098940.1, HP098950.1, HP098960.1, HP098970.1, HP099030.1, HP099060.1	Cg3g004620.1, Cg3g004630.1, Cg5g003770.1, Cg5g003780.1, Cg5g003790.1, Cg5g003810.1, Cg5g003820.1, Cg5g003830.1, Cg5g003850.1, Cg5g003860.1, Cg5g003880.1, Cg5g004160.1, Cg5g004170.1	Cmt059030.1, Cmt059040.1, Cmt059060.1, Cmt059070.1, Cmt059080.1, Cmt059100.1, Cmt059110.1, Cmt059120.1, Cmt059140.1, Cmt059150.1, Cmt059160.1, Cmt059220.1, Cmt059230.1, Cmt108210.1, Cmt108220.1	JLX049020.1, JLX049030.1, JLX049070.1, JLX049100.1, JLX049180.1, JLX049360.1, JLX049950.1, JLX049970.1	LW064920.1, LW064930.1, LW064990.1, LW065000.1, LW065010.1, LW065020.1, LW074210.1	Cms009450.1, Cms009530.1, Cms009550.1, Cms009560.1, Cms009580.1, Cms009590.1, Cms009600.1, Cms009620.1, Cms009630.1, Cms009650.1, Cms009660.1, Cms009670.1		Cs_ont_3g027610.1, Cs_ont_3g027620.1, Cs_ont_5g046720.1, Cs_ont_5g046740.1, Cs_ont_5g046810.1, Cs_ont_5g046830.1, Cs_ont_5g046840.1, Cs_ont_5g046860.1, Cs_ont_5g046870.1, Cs_ont_5g046880.1, Cs_ont_5g046900.1, Cs_ont_5g046910.1, Cs_ont_5g046920.1	SYT001400.1, SYT096720.1, SYT096780.1, SYT096790.1, SYT096800.1, SYT096810.1	Cic067130.1, Cic067140.1, Cic082160.1, Cic082170.1, Cic082230.1, Cic082240.1, Cic082260.1, Cic082270.1, Cic082280.1, Cic082310.1, Cic082320.1	Pt3g000650.1, Pt3g000660.1, Pt3g000730.1, Pt3g000740.1, Pt3g000810.1, Pt3g000820.1, Pt3g000830.1, Pt5g020340.1	H1Y14596.1, H1Y26042.1, H1Y26045.1, H1Y26052.1, H1Y26053.1, H1Y26054.1, H1Y26056.1, H1Y26057.1, H1Y26058.1, H1Y26059.1	H2Y14104.1, H2Y14108.1, H2Y25789.1, H2Y25792.1, H2Y25799.1, H2Y25801.1, H2Y25802.1, H2Y25805.1, H2Y25806.1, H2Y25808.1
OG0012705		OG0000070	Aeg225910.1	Egl269190.1, Egl269200.1, Egl269220.1, Egl269230.1	Citropsis233830.1, Citropsis233840.1, Citropsis233850.1, Citropsis233860.1, Citropsis233870.1, Citropsis233880.1, Citropsis233890.1, Citropsis233900.1, Citropsis233920.1, Citropsis233940.1, Citropsis233950.1, Citropsis233970.1	CP9g000245.t1, CP9g000246.t1, CP9g000248.t1, CP9g000251.t1, CP9g000252.t1, CP9g000253.t1, CP9g000254.t1, CP9g000255.t1, CP9g000256.t1	Ciclev10006295m.1, Ciclev10006300m.1, Ciclev10007206m.1	Fh9g02240.1, Fh9g02250.1, Fh9g02270.1, Fh9g02290.1, Fh9g02300.1, Fh9g02310.1, Fh9g02320.1, Fh9g02330.1, Fh9g02340.1, Fh9g02350.1, Fh9g02370.1, Fh9g02380.1, Fh9g02390.1	Chh183040.1, Chh183060.1, Chh183100.1, Chh183110.1, Chh183120.1, Chh183130.1, Chh183140.1, Chh183150.1, Chh183170.1, Chh183190.1, Chh183200.1	Abu9g_002730.1	HP255140.1, HP255150.1, HP255160.1, HP255170.1, HP255180.1, HP255190.1, HP255200.1, HP255220.1, HP255240.1, HP255250.1, HP255260.1, HP255280.1	Cg9g002190.1, Cg9g002210.1, Cg9g002250.1, Cg9g002270.1, Cg9g002280.1, Cg9g002290.1, Cg9g002300.1, Cg9g002310.1, Cg9g002330.1, Cg9g002350.1, Cg9g002450.1	Cmt156500.1, Cmt156510.1, Cmt156530.1, Cmt156550.1, Cmt156560.1, Cmt156570.1, Cmt156590.1, Cmt156610.1, Cmt156630.1, Cmt156640.1	JLX085340.1, JLX086010.1, JLX086720.1, JLX087080.1, JLX087900.1, JLX088320.1, JLX088400.1, JLX088700.1	LW152440.1, LW152450.1, LW152470.1, LW152480.1, LW152490.1, LW152500.1, LW152510.1, LW152550.1, LW152560.1, LW152580.1	Cms076390.1, Cms076410.1, Cms076450.1, Cms076460.1, Cms076470.1, Cms076480.1, Cms076490.1, Cms076500.1, Cms076520.1, Cms076550.1	Cm229610.1, Cm229630.1, Cm229680.1, Cm229710.1, Cm253580.1, Cm253590.1, Cm253610.1, Cm285010.1, Cm285020.1, Cm311690.1	Cs_ont_9g002370.1, Cs_ont_9g002380.1, Cs_ont_9g002390.1, Cs_ont_9g002410.1, Cs_ont_9g002450.1, Cs_ont_9g002460.1, Cs_ont_9g002470.1, Cs_ont_9g002480.1, Cs_ont_9g002490.1, Cs_ont_9g002510.1	SYT075640.1, SYT075650.1, SYT075660.1, SYT075670.1, SYT075680.1, SYT075690.1	Cic147650.1, Cic147670.1, Cic147710.1, Cic147720.1, Cic147730.1, Cic147740.1, Cic147780.1	Pt9g002070.1, Pt9g002090.1, Pt9g002100.1, Pt9g002120.1, Pt9g002130.1, Pt9g002140.1, Pt9g002150.1, Pt9g002160.1, Pt9g002170.1, Pt9g002180.1, Pt9g002190.1, Pt9g002200.1, Pt9g002220.1	H1Y38030.1, H1Y38031.1, H1Y38032.1, H1Y38034.1, H1Y38035.1, H1Y38039.1, H1Y38041.1, H1Y38042.1, H1Y38043.1, H1Y38044.1, H1Y38046.1, H1Y38048.1, H1Y38051.1, H1Y38052.1	H2Y37944.1, H2Y37945.1, H2Y37946.1, H2Y37948.1, H2Y37949.1, H2Y37953.1, H2Y37956.1, H2Y37957.1, H2Y37958.1, H2Y37959.1, H2Y37960.1, H2Y37962.1, H2Y37964.1, H2Y37966.1
OG0012710		OG0000071	Aeg170290.1, Aeg172150.1		Citropsis120350.1			Fh1g24200.1, Fh2g17920.1, Fh3g05360.1, Fh3g05530.1, Fh3g07780.1, Fh3g17050.1, Fh3g24430.1, Fh3g24640.1, Fh4g11800.1, Fh4g13590.1, Fh6g02160.1, Fh6g03110.1, Fh6g04760.1, Fh6g06890.1, Fh6g12860.1, Fh7g16810.1, Fh8g16100.1, Fh8g17300.1, Fh8g26600.1, Fh9g08940.1, Fh9g08960.1, Fh9g17310.1, FhUn05770.1	Chh034150.1, Chh045710.1, Chh105810.1, Chh109920.1, Chh173950.1, Chh189740.1, Chh234970.1, Chh235130.1, Chh255340.1	Abu1g_024600.1, Abu8g_022860.1	HP070280.1	Cg2g013030.1, Cg2g031750.1, Cg2g035450.1, Cg3g002590.1, Cg5g012680.1, Cg6g002390.1, Cg6g003430.1, Cg6g003920.1, Cg6g006540.1, Cg7g003350.1, Cg7g011550.1		JLX001980.1, JLX035040.1, JLX041680.1, JLX067590.1, JLX067640.1, JLX077820.1, JLX084630.1, JLX091860.1, JLX136910.1, JLX136920.1, JLX144200.1, JLX160890.1, JLX166200.1, JLX205990.1, JLX206030.1, JLX217410.1	LW014660.1, LW017910.1, LW022510.1, LW040360.1, LW072720.1, LW076450.1, LW135420.1, LW167290.1, LW205690.1, LW205730.1, LW205750.1, LW205780.1, LW205820.1, LW205960.1, LW229870.1, LW248960.1, LW308940.1, LW314580.1, LW314590.1, LW314600.1, LW314850.1	Cms022580.1, Cms029810.1, Cms072970.1, Cms074050.1, Cms089190.1, Cms098860.1, Cms129150.1, Cms133620.1, Cms135100.1, Cms149440.1, Cms149480.1, Cms151800.1, Cms154720.1, Cms168510.1, Cms186510.1, Cms236360.1, Cms241410.1, Cms269000.1	Cm037070.1, Cm081100.1, Cm121890.1, Cm130650.1, Cm131490.1, Cm139300.1, Cm180790.1, Cm209850.1, Cm234610.1, Cm239170.1, Cm247080.1, Cm297150.1			Cic023270.1, Cic026300.1, Cic120010.1, Cic143210.1, Cic158780.1, Cic169880.1, Cic264880.1, Cic271160.1, Cic271200.1, Cic271250.1, Cic286250.1, Cic286360.1, Cic286410.1, Cic286510.1, Cic286560.1, Cic286610.1, Cic286670.1, Cic295490.1	Pt5g009950.1, Pt8g010840.1, Pt9g019480.1, PtUn000700.1, PtUn012030.1, PtUn034270.1	H1Y02969.1, H1Y06980.1, H1Y07033.1, H1Y07454.1, H1Y08343.1, H1Y09037.1, H1Y14919.1, H1Y17643.1, H1Y18950.1, H1Y22927.1, H1Y26769.1, H1Y28213.1, H1Y28604.1, H1Y28840.1, H1Y29238.1, H1Y36805.1, H1Y38917.1, H1Y39196.1, H1Y39644.1, H1Y40289.1, H1Y40290.1, H1Y40384.1, H1Y40413.1	H2Y03200.1, H2Y08468.1, H2Y12850.1, H2Y13453.1, H2Y13458.1, H2Y13464.1, H2Y14161.1, H2Y16777.1, H2Y17974.1, H2Y24068.1, H2Y28017.1, H2Y28380.1, H2Y28454.1, H2Y28622.1, H2Y28974.1, H2Y29110.1, H2Y30016.1, H2Y31678.1, H2Y34908.1, H2Y36763.1, H2Y36764.1, H2Y39588.1, H2Y40018.1, H2Y40380.1
OG0012711		OG0000072	Aeg032720.1, Aeg116140.1, Aeg271490.1	Egl079090.1, Egl229290.1, Egl236060.1, Egl236620.1	Citropsis039290.1, Citropsis166210.1, Citropsis168910.1, Citropsis189630.1, Citropsis194140.1	CP2g003786.t1, CP3g003427.t1, CP5g002562.t1, CP6g001894.t1, CP8g001339.t1, CP8g001340.t1, CP9g000475.t1, CP9g001575.t1, CP9g001576.t1	Ciclev10006756m.1, Ciclev10010337m.1, Ciclev10013758m.1	Fh1g19800.1, Fh1g24680.1, Fh1g30210.1, Fh3g02130.1, Fh3g02410.1, Fh3g05170.1, Fh3g08510.1, Fh3g16700.1, Fh3g22070.1, Fh4g12600.1, Fh4g13530.1, Fh5g12490.1, Fh5g13760.1, Fh5g16100.1, Fh5g20570.1, Fh5g39270.1, Fh6g01530.1, Fh6g03830.1, Fh7g07870.1, Fh7g07940.1, Fh8g11360.1, Fh8g21830.1, Fh9g15330.1, FhUn00740.1, FhUn06270.1	Chh048830.1, Chh054270.1, Chh128630.1, Chh167700.1	Abu1g_018180.1	HP051850.1, HP191140.1	Cg1g016070.1, Cg1g021560.1, Cg1g021570.1, Cg1g022670.1, Cg1g024410.1, Cg2g007700.1, Cg2g010820.1, Cg2g014140.1, Cg2g018650.1, Cg2g023390.1, Cg2g025680.1, Cg2g029640.1, Cg2g040630.1, Cg3g004870.1, Cg3g009250.1, Cg4g005340.1, Cg4g005370.1, Cg5g013290.1, Cg5g013940.1, Cg5g017480.1, Cg5g028580.1, Cg7g010040.1, Cg7g014930.1, Cg7g014940.1, Cg8g006520.1, Cg8g018910.1, Cg9g003350.1, Cg9g008820.1, Cg9g012…		JLX058050.1, JLX065420.1, JLX119060.1, JLX150910.1, JLX172850.1, JLX173110.1, JLX187210.1, JLX210100.1, JLX217580.1, JLX230460.1, JLX231120.1	LW002830.1, LW108040.1, LW260560.1, LW260580.1, LW268540.1, LW312980.1, LW313000.1	Cms126730.1, Cms157800.1, Cms157810.1, Cms157820.1, Cms157830.1	Cm040170.1, Cm054620.1, Cm057380.1, Cm069650.1, Cm070060.1, Cm074640.1, Cm083180.1, Cm128580.1, Cm136200.1, Cm136470.1, Cm136480.1, Cm142210.1, Cm142790.1, Cm169670.1, Cm171580.1, Cm178440.1, Cm183810.1, Cm191830.1, Cm214620.1, Cm215460.1, Cm216860.1, Cm220530.1, Cm224150.1, Cm225410.1, Cm231460.1, Cm233450.1, Cm245660.1, Cm257200.1, Cm272960.1, Cm274180.1, Cm274190.1, Cm321090.1	Cs_ont_6g025630.1	SYT013490.1	Cic069540.1, Cic179520.1, Cic263010.1	Pt5g022560.1, Pt5g022740.1, Pt5g022920.1, Pt9g014930.1, PtUn014880.1	H1Y02638.1, H1Y05549.1, H1Y05620.1, H1Y13349.1, H1Y13355.1, H1Y13719.1, H1Y15238.1, H1Y15491.1, H1Y21267.1, H1Y21824.1, H1Y24497.1, H1Y29720.1, H1Y31006.1, H1Y31797.1, H1Y35311.1, H1Y38162.1, H1Y38309.1, H1Y39760.1, H1Y41341.1	H2Y02405.1, H2Y08584.1, H2Y09160.1, H2Y13289.1, H2Y17913.1, H2Y24411.1, H2Y29555.1, H2Y29559.1, H2Y31457.1, H2Y36160.1, H2Y38066.1, H2Y39655.1, H2Y39770.1, H2Y39983.1
OG0012713		OG0000073	Aeg085390.1, Aeg145820.1, Aeg168640.1, Aeg168650.1, Aeg168680.1, Aeg168690.1, Aeg168710.1	Egl237010.1, Egl237070.1, Egl237090.1, Egl237100.1, Egl237110.1	Citropsis147150.1, Citropsis147200.1, Citropsis147210.1, Citropsis147220.1, Citropsis147230.1, Citropsis147250.1, Citropsis147330.1, Citropsis147340.1	CP5g002324.t1, CP5g002325.t1, CP5g002331.t1, CP5g002332.t1, CP5g002335.t1, CP5g002346.t1, CP5g002347.t1, CP5g002356.t1, CP5g002357.t1, CP5g002359.t1, CP5g002363.t1, CP5g002365.t1, CP5g002371.t1	Ciclev10023361m.1, Ciclev10023412m.1, Ciclev10024617m.1, Ciclev10024663m.1	Fh5g28840.1, Fh5g28860.1, Fh5g28880.1, Fh5g28890.1, Fh5g28900.1, Fh5g28910.1, Fh5g28960.1, Fh5g29060.1, Fh5g29080.1	Chh103130.1, Chh103140.1, Chh254790.1, Chh254840.1, Chh254880.1, Chh254890.1, Chh276080.1	Abu5g_021090.1, Abu5g_021110.1	HP004990.1, HP005070.1, HP005090.1, HP005100.1, HP209030.1, HP209040.1, HP209090.1	Cg2g016290.1, Cg2g016300.1, Cg2g016350.1, Cg2g016360.1, Cg2g016370.1, Cg2g016380.1, Cg2g016480.1, Cg2g016550.1	Cmt080700.1, Cmt080720.1, Cmt080750.1, Cmt080780.1, Cmt080810.1, Cmt080820.1, Cmt080870.1, Cmt080880.1, Cmt080890.1, Cmt080920.1, Cmt080930.1, Cmt080980.1	JLX148930.1, JLX149180.1, JLX149280.1, JLX149330.1, JLX149580.1	LW110510.1, LW110550.1, LW110570.1, LW110580.1, LW110610.1, LW110620.1, LW110650.1, LW110660.1, LW110670.1, LW277500.1, LW277540.1, LW277560.1, LW277570.1, LW277590.1, LW277600.1	Cms116190.1, Cms116200.1, Cms116210.1, Cms155930.1, Cms155940.1, Cms155980.1, Cms155990.1, Cms156000.1, Cms156010.1, Cms156030.1, Cms156070.1	Cm215400.1, Cm215410.1, Cm215420.1, Cm215430.1, Cm215450.1, Cm265250.1, Cm265290.1, Cm294630.1, Cm294640.1, Cm294650.1	Cs_ont_5g021840.1, Cs_ont_5g021900.1, Cs_ont_5g021970.1, Cs_ont_5g021980.1, Cs_ont_5g021990.1, Cs_ont_5g022050.1, Cs_ont_5g022060.1, Cs_ont_5g022090.1, Cs_ont_5g022110.1, Cs_ont_5g022140.1, Cs_ont_5g022190.1	SYT103520.1, SYT103530.1, SYT103540.1, SYT103560.1, SYT103580.1	Cic047930.1, Cic047980.1, Cic048010.1, Cic048020.1, Cic048030.1, Cic048040.1, Cic048100.1, Cic048180.1, Cic048190.1, Cic120160.1, Cic120230.1, Cic120280.1, Cic120290.1, Cic120370.1, Cic120380.1, Cic120390.1, Cic184350.1, Cic184380.1, Cic245640.1	Pt3g022610.1, Pt3g022620.1, Pt3g022630.1, Pt3g022650.1, Pt3g022680.1	H1Y22280.1, H1Y22281.1, H1Y22284.1, H1Y22308.1, H1Y22309.1, H1Y22311.1, H1Y22313.1, H1Y22315.1, H1Y22321.1	H2Y22047.1, H2Y22049.1, H2Y22076.1, H2Y22077.1, H2Y22078.1, H2Y22088.1, H2Y22089.1, H2Y22110.1, H2Y22111.1, H2Y22115.1, H2Y22117.1, H2Y22120.1, H2Y22125.1
OG0012714		OG0000074		Egl037150.1, Egl037170.1, Egl037180.1, Egl118290.1, Egl118350.1		CP3g002836.t1, CP3g002849.t1, CP3g002851.t1, CP3g002852.t1, CP3g002854.t1, CP3g002855.t1, CP3g002864.t1, CP3g002865.t1, CP3g002874.t1, CP3g004120.t1, CP3g004127.t1, CP3g004128.t1, CP3g004130.t1, CP3g004131.t1, CP3g004132.t1, CP3g004135.t1, CP8g001002.t1, CP8g001003.t1, CP8g001005.t1, CP8g001014.t1, CP8g001020.t1	Ciclev10000141m.1, Ciclev10000162m.1, Ciclev10000193m.1, Ciclev10003200m.1, Ciclev10003290m.1, Ciclev10003330m.1, Ciclev10003386m.1, Ciclev10003483m.1, Ciclev10003539m.1, Ciclev10003540m.1, Ciclev10003877m.1, Ciclev10010867m.1, Ciclev10010869m.1, Ciclev10010871m.1, Ciclev10029798m.1, Ciclev10029818m.1, Ciclev10029830m.1, Ciclev10029889m.1, Ciclev10030139m.1, Ciclev10030334m.1	Fh2g20010.1, Fh3g01810.1, Fh3g01850.1, Fh3g01860.1, Fh3g01900.1, Fh3g01910.1, Fh3g02530.1, Fh3g13160.1, Fh3g13190.1, Fh3g13200.1, Fh3g13270.1	Chh000300.1, Chh000310.1, Chh000320.1, Chh000340.1, Chh072050.1, Chh072060.1, Chh107950.1, Chh107960.1, Chh107970.1, Chh108010.1, Chh108020.1, Chh108060.1, Chh108080.1, Chh108100.1, Chh108140.1, Chh144140.1	Abu3g_001410.1, Abu3g_001440.1, Abu3g_001500.1, Abu3g_001510.1, Abu3g_006920.1	HP090300.1, HP150030.1, HP280230.1				LW100060.1, LW100070.1, LW100080.1, LW100130.1, LW100140.1, LW100200.1, LW100240.1, LW100270.1, LW100340.1, LW100350.1, LW309880.1, LW309890.1, LW309950.1		Cm087500.1, Cm095240.1, Cm118130.1, Cm118140.1, Cm136030.1, Cm142280.1, Cm228130.1, Cm228150.1, Cm228160.1, Cm228190.1, Cm228240.1, Cm255140.1, Cm255150.1, Cm306190.1	Cs_ont_2g017260.1, Cs_ont_3g023580.1, Cs_ont_3g023600.1, Cs_ont_3g023620.1, Cs_ont_3g023630.1, Cs_ont_3g023680.1, Cs_ont_3g023690.1, Cs_ont_3g023730.1, Cs_ont_3g023760.1, Cs_ont_3g023780.1, Cs_ont_3g023800.1, Cs_ont_3g031670.1, Cs_ont_3g031750.1, Cs_ont_3g031780.1, Cs_ont_3g033510.1, Cs_ont_Un005840.1	SYT018550.1	Cic012580.1, Cic012590.1, Cic012640.1, Cic012670.1, Cic055140.1, Cic102100.1, Cic102110.1, Cic102130.1, Cic102160.1, Cic102260.1, Cic102270.1, Cic102290.1, Cic102350.1, Cic102370.1	Pt5g022790.1, PtUn000740.1, PtUn010050.1, PtUn010090.1, PtUn010100.1, PtUn014930.1, PtUn019690.1, PtUn023770.1, PtUn023780.1, PtUn023790.1	H1Y13811.1, H1Y13815.1, H1Y13819.1, H1Y13824.1, H1Y13832.1, H1Y13834.1, H1Y13840.1, H1Y13842.1, H1Y15424.1, H1Y15427.1, H1Y15435.1, H1Y15439.1, H1Y15441.1, H1Y15447.1, H1Y15449.1, H1Y36725.1, H1Y36730.1, H1Y36731.1, H1Y36733.1, H1Y36736.1, H1Y36739.1	H2Y13388.1, H2Y13392.1, H2Y13397.1, H2Y13404.1, H2Y13412.1, H2Y13415.1, H2Y13422.1, H2Y13427.1, H2Y14870.1, H2Y14880.1, H2Y14883.1, H2Y14890.1, H2Y14896.1, H2Y14898.1, H2Y14900.1
OG0012715		OG0000075		Egl081450.1, Egl116090.1	Citropsis191290.1, Citropsis191650.1	CP1g000181.t1, CP1g000187.t1, CP2g004098.t1, CP6g001607.t1, CP6g001612.t1, CP6g002779.t1, CP6g002783.t1, CP6g002786.t1, CP6g002789.t1, CP6g002791.t1, CP6g002809.t1, CP6g002811.t1, CP6g002815.t1, CP7g002274.t1, CP7g002629.t1, CP7g002632.t1, CP7g002634.t1, CP7g003255.t1, CP7g003281.t1	Ciclev10010968m.1, Ciclev10010969m.1, Ciclev10011288m.1, Ciclev10011359m.1, Ciclev10011498m.1, Ciclev10013307m.1, Ciclev10013349m.1, Ciclev10013426m.1, Ciclev10013449m.1, Ciclev10013524m.1, Ciclev10013537m.1, Ciclev10013557m.1, Ciclev10013713m.1, Ciclev10013815m.1, Ciclev10013847m.1, Ciclev10013853m.1, Ciclev10014161m.1, Ciclev10018087m.1, Ciclev10027283m.1, Ciclev10027441m.1, Ciclev10030587m.1, …	Fh1g30090.1, Fh1g30140.1, Fh1g30230.1, Fh1g30350.1, Fh2g00210.1, Fh6g01170.1, Fh6g01240.1, Fh6g01300.1, Fh6g01330.1, Fh6g01340.1, Fh6g01430.1, Fh6g01440.1, Fh6g01460.1, Fh6g10130.1, Fh6g12970.1, Fh7g01330.1, Fh7g06540.1, Fh7g06560.1, Fh7g06580.1, Fh7g06590.1, Fh7g06610.1, Fh7g09610.1, Fh7g09630.1, Fh7g09640.1	Chh128530.1, Chh128550.1, Chh167790.1	Abu6g_021490.1	HP017600.1, HP017610.1, HP160150.1	Cg1g028610.1, Cg2g000220.1, Cg4g014360.1, Cg4g014380.1, Cg5g013730.1, Cg5g013740.1, Cg5g013790.1, Cg6g006680.1, Cg7g001090.1, Cg7g001300.1, Cg7g001800.1, Cg7g007110.1, Cg7g007120.1, Cg7g007130.1, Cg7g007150.1		JLX033410.1, JLX052590.1, JLX089540.1, JLX138770.1, JLX139340.1, JLX139930.1, JLX159120.1, JLX160030.1, JLX160570.1, JLX160720.1, JLX162130.1, JLX162240.1, JLX163050.1, JLX166150.1, JLX166230.1, JLX166280.1, JLX189380.1, JLX207920.1, JLX232220.1, JLX232310.1, JLX232340.1, JLX232480.1, JLX232530.1		Cms098960.1	Cm087880.1, Cm145920.1, Cm233610.1, Cm235350.1, Cm239300.1, Cm263160.1, Cm283750.1, Cm283770.1		SYT021570.1	Cic091620.1, Cic262800.1	Pt2g000170.1, Pt4g017790.1, Pt4g017810.1, Pt4g017820.1, Pt4g021970.1, Pt6g013310.1, Pt6g013330.1, Pt6g015180.1, Pt6g019570.1, Pt6g019600.1, Pt6g019640.1, Pt7g000070.1, PtUn005090.1, PtUn021090.1, PtUn021110.1, PtUn022370.1, PtUn022400.1, PtUn022410.1, PtUn026700.1	H1Y02158.1, H1Y28195.1, H1Y29733.1, H1Y29737.1, H1Y29744.1, H1Y29750.1, H1Y29756.1, H1Y29773.1, H1Y29783.1, H1Y29791.1, H1Y29795.1, H1Y30102.1, H1Y30824.1, H1Y30827.1, H1Y30833.1, H1Y31308.1	H2Y01697.1, H2Y10256.1, H2Y28000.1, H2Y29565.1, H2Y29570.1, H2Y29571.1, H2Y29598.1, H2Y29599.1, H2Y29602.1, H2Y29606.1, H2Y29609.1, H2Y29863.1, H2Y29864.1, H2Y30528.1, H2Y30529.1, H2Y30531.1, H2Y30959.1, H2Y30962.1
OG0012716		OG0000076	Aeg048750.1, Aeg048770.1, Aeg168720.1, Aeg168750.1, Aeg168780.1, Aeg168790.1, Aeg168800.1, Aeg168810.1, Aeg168840.1, Aeg168860.1, Aeg170520.1, Aeg170530.1	Egl236680.1, Egl236690.1, Egl236710.1, Egl236770.1, Egl236860.1, Egl236870.1	Citropsis147390.1, Citropsis147420.1, Citropsis147450.1, Citropsis147500.1	CP5g002373.t1, CP5g002374.t1, CP5g002375.t1, CP5g002378.t1, CP5g002379.t1, CP5g002380.t1, CP5g002381.t1, CP5g002384.t1, CP5g002385.t1, CP5g002387.t1, CP5g002389.t1, CP5g002391.t1, CP5g002393.t1, CP5g002394.t1		Fh5g28680.1, Fh5g28720.1, Fh5g28730.1, Fh5g28760.1, Fh5g28770.1, Fh5g28810.1, Fh5g28820.1, Fh5g28830.1	Chh252830.1		HP004900.1, HP004920.1, HP004940.1, HP004970.1, HP005000.1, HP005010.1, HP005020.1, HP005030.1	Cg2g016260.1, Cg2g016270.1, Cg2g016280.1		JLX149250.1, JLX149320.1, JLX149430.1, JLX149490.1, JLX149550.1, JLX149690.1	LW110340.1, LW110360.1, LW110370.1, LW110400.1, LW110410.1, LW110430.1, LW110440.1, LW110450.1, LW110460.1, LW110470.1, LW110480.1, LW110490.1, LW277460.1, LW277470.1		Cm069990.1, Cm070020.1, Cm070030.1, Cm070040.1, Cm070050.1, Cm226360.1, Cm226370.1, Cm226390.1, Cm226400.1, Cm264610.1, Cm264620.1, Cm269570.1, Cm269580.1, Cm292920.1, Cm294970.1		SYT103590.1, SYT103600.1, SYT103610.1, SYT103620.1, SYT103630.1, SYT103640.1	Cic047790.1, Cic047800.1, Cic047820.1, Cic047830.1, Cic047840.1, Cic047850.1, Cic047860.1, Cic047880.1, Cic047890.1, Cic047900.1, Cic120050.1, Cic120060.1, Cic120070.1, Cic120080.1, Cic120090.1, Cic120110.1, Cic120120.1, Cic120130.1	Pt3g021240.1, Pt3g021260.1, Pt3g021270.1, Pt3g021280.1, Pt3g021290.1, Pt3g021300.1, Pt3g021310.1, Pt3g021320.1, Pt3g021330.1, Pt3g021340.1, Pt3g021350.1, Pt3g021360.1, Pt3g021370.1, Pt3g021380.1, Pt3g021390.1, Pt3g021400.1, Pt3g022690.1, Pt3g022700.1, Pt3g022710.1, Pt3g022720.1, Pt3g022730.1, Pt3g022740.1, Pt3g022750.1, Pt3g022760.1, Pt3g022770.1, Pt3g022790.1, Pt3g022800.1, PtUn032020.1, PtUn035…	H1Y22326.1, H1Y22327.1, H1Y22328.1, H1Y22331.1, H1Y22332.1, H1Y22333.1, H1Y22334.1, H1Y22338.1, H1Y22339.1, H1Y22340.1, H1Y22342.1, H1Y22344.1, H1Y22347.1, H1Y22359.1	H2Y22130.1, H2Y22131.1, H2Y22132.1, H2Y22136.1, H2Y22137.1, H2Y22138.1, H2Y22141.1, H2Y22142.1, H2Y22143.1, H2Y22146.1, H2Y22147.1, H2Y22148.1, H2Y22151.1, H2Y22152.1, H2Y22153.1, H2Y22154.1, H2Y22158.1, H2Y22160.1, H2Y22161.1, H2Y22163.1, H2Y22164.1, H2Y22171.1
OG0012717		OG0000077		Egl019120.1, Egl107870.1, Egl119830.1, Egl120530.1, Egl152020.1, Egl160710.1, Egl161020.1, Egl278000.1	Citropsis024190.1, Citropsis035730.1, Citropsis035740.1, Citropsis052740.1, Citropsis052760.1, Citropsis063570.1, Citropsis063580.1, Citropsis079010.1, Citropsis098850.1, Citropsis103500.1, Citropsis143790.1, Citropsis169550.1, Citropsis171040.1, Citropsis174290.1, Citropsis174300.1, Citropsis203380.1, Citropsis217530.1, Citropsis226820.1, Citropsis226830.1, Citropsis266550.1, Citropsis280780.1	CP2g002627.t1, CP2g002628.t1, CP5g002788.t1, CP5g002961.t1, CP5g003371.t1, CP7g002215.t1, CP8g002348.t1	Ciclev10003583m.1, Ciclev10010764m.1, Ciclev10023299m.1, Ciclev10023635m.1, Ciclev10024411m.1, Ciclev10027388m.1, Ciclev10029964m.1, Ciclev10030348m.1, Ciclev10033378m.1	Fh2g13100.1, Fh2g21240.1, Fh3g21550.1, Fh3g37220.1, Fh7g16980.1, Fh7g32840.1, Fh8g05310.1, Fh8g18490.1, FhUn04100.1, FhUn09460.1	Chh069580.1, Chh082700.1, Chh082710.1, Chh253430.1, Chh253440.1, Chh256890.1, Chh256900.1, Chh281890.1, Chh281900.1	Abu1g_019700.1, Abu2g_011950.1, Abu2g_011960.1, Abu2g_011970.1, Abu2g_024800.1, Abu3g_010890.1, Abu5g_046470.1, Abu8g_005740.1, Abu8g_005960.1, Abu8g_005970.1, Abu8g_005980.1, Abu8g_009390.1	HP123810.1, HP123830.1, HP132800.1	Cg2g012740.1, Cg2g021100.1, Cg2g021110.1, Cg2g021120.1, Cg5g014340.1, Cg5g014350.1, Cg8g010850.1	Cmt005180.1, Cmt009820.1, Cmt085510.1, Cmt151010.1, Cmt151020.1, Cmt180070.1, Cmt204920.1, Cmt204930.1	JLX038960.1, JLX095060.1, JLX150010.1, JLX158970.1	LW027350.1, LW027360.1, LW052660.1, LW134320.1, LW162480.1, LW162490.1, LW164770.1, LW170200.1, LW180390.1, LW180400.1, LW180410.1, LW193200.1, LW193210.1, LW223060.1, LW231480.1, LW231490.1	Cms022830.1, Cms069780.1, Cms069790.1, Cms091660.1, Cms118650.1, Cms118660.1, Cms128550.1, Cms128560.1, Cms128570.1, Cms128580.1, Cms154150.1, Cms154160.1, Cms159330.1, Cms183170.1, Cms183180.1	Cm018110.1, Cm089520.1, Cm222210.1, Cm222220.1, Cm239570.1, Cm241060.1, Cm258790.1, Cm258800.1, Cm258810.1, Cm258820.1, Cm267430.1, Cm299420.1, Cm311030.1, Cm316070.1	Cs_ont_2g023210.1, Cs_ont_3g017950.1, Cs_ont_3g027150.1, Cs_ont_7g008980.1, Cs_ont_7g009960.1, Cs_ont_7g021380.1, Cs_ont_7g021390.1, Cs_ont_8g010830.1, Cs_ont_8g010840.1	SYT000790.1, SYT122170.1	Cic000610.1, Cic000620.1, Cic014390.1, Cic167420.1, Cic184420.1, Cic184960.1, Cic199990.1, Cic246450.1, Cic246460.1, Cic246470.1, Cic272250.1, Cic272260.1		H1Y08991.1, H1Y08992.1, H1Y09171.1, H1Y14522.1, H1Y23564.1, H1Y30431.1, H1Y31387.1, H1Y35227.1	H2Y08523.1, H2Y17462.1, H2Y17463.1, H2Y21298.1, H2Y30347.1, H2Y31035.1, H2Y34855.1
OG0012718		OG0000078		Egl017880.1, Egl023700.1, Egl060500.1, Egl060510.1, Egl083230.1, Egl111560.1, Egl113200.1, Egl131560.1, Egl167910.1, Egl197120.1, Egl225960.1, Egl266560.1, Egl266570.1, Egl271040.1, Egl271050.1, Egl272140.1, Egl289850.1	Citropsis167870.1	CP3g001752.t1, CP3g001771.t1, CP3g004265.t1, CP3g004266.t1, CP3g004267.t1, CP3g004268.t1, CP5g001700.t1, CP5g002897.t1, CP5g003687.t1, CP7g001443.t1, CP7g002033.t1, CP8g001069.t1, CP9g001186.t1	Ciclev10002333m.1, Ciclev10020105m.1, Ciclev10021259m.1, Ciclev10021484m.1, Ciclev10023350m.1, Ciclev10031514m.1, Ciclev10033783m.1	Fh2g10830.1, Fh5g31200.1, Fh6g14500.1, Fh6g14510.1, Fh8g13960.1, Fh9g22910.1, FhUn08090.1	Chh046140.1, Chh046150.1, Chh047810.1, Chh151080.1, Chh169670.1, Chh190830.1, Chh194330.1, Chh194340.1, Chh212730.1	Abu3g_017610.1, Abu5g_028020.1, Abu5g_028030.1, Abu5g_029040.1, Abu5g_045870.1, Abu8g_020270.1	HP119910.1, HP286000.1, HP286010.1, HP286020.1	Cg2g006260.1, Cg3g017320.1, Cg5g011850.1, Cg5g011860.1, Cg5g016470.1, Cg5g016480.1, Cg8g010550.1, Cg8g017050.1, Cg8g017060.1, Cg9g008930.1	Cmt178130.1	JLX053310.1, JLX173100.1, JLX227270.1, JLX228070.1	LW014730.1, LW023310.1, LW039070.1, LW050590.1, LW071870.1, LW189780.1, LW199740.1, LW199750.1, LW244100.1, LW260440.1, LW312870.1	Cms032250.1, Cms032260.1, Cms032270.1, Cms032280.1, Cms147040.1, Cms158890.1, Cms158900.1, Cms204000.1, Cms216550.1, Cms255440.1	Cm017740.1, Cm121560.1, Cm121570.1, Cm317140.1	Cs_ont_1g009490.1, Cs_ont_2g029470.1, Cs_ont_3g008500.1, Cs_ont_3g032640.1, Cs_ont_3g032650.1, Cs_ont_5g029230.1, Cs_ont_5g029240.1, Cs_ont_5g032810.1, Cs_ont_5g032820.1, Cs_ont_7g011700.1, Cs_ont_7g011710.1, Cs_ont_9g009040.1, Cs_ont_9g026170.1	SYT026370.1, SYT042730.1, SYT044000.1, SYT044850.1, SYT057810.1, SYT059220.1, SYT083730.1, SYT083740.1, SYT103010.1, SYT119410.1, SYT148250.1, SYT148260.1, SYT150280.1, SYT151320.1, SYT177680.1, SYT218590.1, SYT254240.1	Cic020950.1, Cic028280.1, Cic100680.1, Cic100690.1, Cic100700.1, Cic177330.1, Cic178880.1, Cic178890.1, Cic260960.1, Cic294780.1	Pt1g013150.1, Pt3g010810.1, Pt3g014340.1, Pt4g015210.1, Pt5g013460.1, Pt9g015600.1, PtUn020100.1, PtUn020110.1, PtUn020620.1, PtUn020630.1	H1Y03802.1, H1Y12556.1, H1Y21568.1, H1Y22170.1, H1Y24221.1, H1Y29092.1, H1Y29209.1, H1Y30581.1, H1Y31693.1, H1Y35992.1, H1Y38923.1, H1Y41138.1	H2Y02996.1, H2Y08015.1, H2Y10182.1, H2Y11332.1, H2Y17849.1, H2Y17850.1, H2Y17851.1, H2Y21348.1, H2Y23342.1, H2Y23994.1, H2Y24021.1, H2Y35734.1, H2Y35735.1, H2Y41150.1
OG0012719		OG0000079			Citropsis145020.1, Citropsis145080.1, Citropsis145490.1, Citropsis146300.1, Citropsis159100.1, Citropsis159240.1, Citropsis159250.1, Citropsis159500.1, Citropsis159520.1, Citropsis159730.1, Citropsis159770.1, Citropsis159790.1, Citropsis213910.1, Citropsis264240.1, Citropsis274000.1, Citropsis274050.1, Citropsis274170.1, Citropsis274180.1, Citropsis274310.1, Citropsis274320.1	CP3g003129.t1, CP3g003137.t1, CP3g003161.t1, CP3g003958.t1, CP3g003961.t1, CP3g003963.t1, CP3g003970.t1, CP3g003973.t1, CP3g003975.t1, CP3g003977.t1, CP3g003978.t1, CP3g003983.t1, CP3g003985.t1, CP3g003987.t1, CP3g003990.t1, CP3g003992.t1, CP3g003999.t1, CP3g004052.t1, CP3g004057.t1, CP3g004061.t1, CP3g004066.t1, CP3g004073.t1, CP3g004082.t1, CP3g004094.t1, CP3g004100.t1, CP3g004106.t1, CP3g00411…	Ciclev10003496m.1, Ciclev10003880m.1	Fh3g00160.1, Fh3g00300.1, Fh3g00660.1, Fh3g00970.1, Fh3g01180.1, Fh3g02250.1, Fh3g02300.1, Fh3g02330.1, Fh3g02360.1, Fh3g02390.1, Fh3g02420.1, Fh3g02460.1, Fh3g02500.1, Fh3g02570.1, Fh3g02630.1, Fh3g03170.1, Fh3g03200.1, Fh3g03210.1, Fh3g03260.1, Fh3g03290.1, Fh3g03320.1, Fh3g10750.1, Fh3g11030.1, Fh3g11110.1, Fh6g01860.1, FhUn01210.1, FhUn01260.1, FhUn01310.1, FhUn01330.1, FhUn01360.1, FhUn02050…	Chh273910.1	Abu3g_001000.1	HP058920.1, HP058940.1, HP058960.1, HP150590.1, HP177110.1			JLX000290.1, JLX000320.1, JLX000540.1, JLX000670.1, JLX108030.1, JLX148770.1, JLX148790.1, JLX148800.1, JLX232430.1, JLX232570.1, JLX232640.1, JLX232790.1, JLX232810.1, JLX232900.1	LW179010.1		Cm324590.1	Cs_ont_3g025610.1	SYT103300.1, SYT103310.1, SYT109440.1, SYT109450.1, SYT123770.1, SYT134080.1, SYT142940.1, SYT181700.1			H1Y14182.1, H1Y15298.1, H1Y15300.1, H1Y15307.1, H1Y15337.1, H1Y15576.1, H1Y15581.1, H1Y15588.1, H1Y15604.1, H1Y15632.1, H1Y15636.1, H1Y15698.1, H1Y15701.1	H2Y13754.1, H2Y14730.1, H2Y14738.1, H2Y14741.1, H2Y14747.1, H2Y14752.1, H2Y14764.1, H2Y14769.1, H2Y14775.1, H2Y14842.1, H2Y15038.1, H2Y15076.1, H2Y15088.1, H2Y15098.1, H2Y15103.1, H2Y15106.1, H2Y15168.1
OG0012720		OG0000080	Aeg073350.1, Aeg073360.1, Aeg073380.1, Aeg073390.1, Aeg258510.1	Egl017320.1, Egl017340.1, Egl017360.1, Egl017370.1, Egl017390.1, Egl017420.1, Egl017450.1, Egl017530.1, Egl077570.1, Egl077580.1, Egl077620.1, Egl077630.1, Egl077670.1, Egl077680.1, Egl077690.1, Egl200400.1	Citropsis128520.1, Citropsis137610.1, Citropsis137620.1, Citropsis137630.1	CP2g000997.t1, CP7g001656.t1, CP7g001657.t1, CP7g001660.t1, CP7g001662.t1, CP7g001665.t1, CP7g001666.t1, CP7g001669.t1, CP7g001670.t1, CP7g001672.t1, CP7g001679.t1, CP7g001680.t1	Ciclev10017873m.1, Ciclev10030929m.1, Ciclev10031020m.1, Ciclev10031115m.1, Ciclev10031258m.1, Ciclev10031310m.1, Ciclev10031343m.1, Ciclev10031432m.1, Ciclev10031506m.1, Ciclev10031627m.1, Ciclev10031749m.1, Ciclev10033533m.1, Ciclev10033799m.1	Fh2g28080.1, Fh7g16120.1, Fh7g16140.1, Fh7g16190.1, Fh7g16230.1, Fh7g16250.1, Fh7g16260.1, Fh7g16280.1, Fh7g16290.1, Fh7g16320.1, Fh7g16340.1, Fh7g16350.1, Fh7g16380.1, Fh7g16430.1, Fh7g16440.1, Fh7g16480.1	Chh016890.1, Chh076060.1, Chh076070.1, Chh076090.1, Chh076100.1, Chh127220.1, Chh127310.1, Chh127330.1, Chh127350.1, Chh127390.1, Chh127410.1, Chh127420.1	Abu2g_008620.1, Abu7g_012830.1, Abu7g_012840.1, Abu7g_012860.1, Abu7g_012870.1, Abu7g_012880.1, Abu7g_012920.1	HP083550.1, HP223070.1	Cg2g038060.1, Cg7g012270.1, Cg7g012270.2.1, Cg7g012280.1, Cg7g012290.1, Cg7g012320.1	Cmt013070.1, Cmt013190.1, Cmt013220.1, Cmt168190.1	JLX013280.1, JLX078000.1	LW170370.1, LW170430.1, LW170470.1, LW170490.1, LW170510.1, LW212570.1	Cms000430.1, Cms000440.1, Cms000450.1, Cms257110.1	Cm128000.1, Cm128010.1, Cm196830.1, Cm196830.2.1, Cm305930.1	Cs_ont_2g009270.1, Cs_ont_7g014370.1, Cs_ont_7g014430.1, Cs_ont_7g014470.1, Cs_ont_7g014480.1, Cs_ont_7g014490.1, Cs_ont_7g014500.1, Cs_ont_7g014520.1, Cs_ont_7g014550.1, Cs_ont_7g014570.1, Cs_ont_7g014580.1, Cs_ont_7g014600.1	SYT026550.1, SYT234690.1	Cic007060.1, Cic247160.1, Cic247170.1, Cic247190.1, Cic247210.1	Pt2g022010.1, Pt4g012370.1, Pt4g012390.1, Pt4g012400.1, Pt4g012410.1, Pt4g013160.1, Pt4g013170.1, Pt4g013210.1, Pt4g013220.1, Pt4g013230.1, Pt4g013240.1, Pt4g013250.1, Pt4g013280.1, Pt4g013290.1, Pt4g013300.1, PtUn025760.1, PtUn025780.1, PtUn025800.1, PtUn025820.1, PtUn025840.1	H1Y01085.1, H1Y01089.1, H1Y06956.1, H1Y32107.1, H1Y32108.1, H1Y32110.1, H1Y32112.1, H1Y32113.1, H1Y32115.1, H1Y32121.1, H1Y32124.1, H1Y32125.1, H1Y32130.1, H1Y32134.1, H1Y32136.1, H1Y32140.1	H2Y06568.1, H2Y31766.1, H2Y31767.1, H2Y31770.1, H2Y31773.1, H2Y31775.1, H2Y31778.1, H2Y31780.1, H2Y31786.1
OG0012721		OG0000081	Aeg275850.1	Egl080660.1, Egl080680.1, Egl080910.1, Egl080950.1, Egl107160.1, Egl126860.1, Egl172870.1, Egl172930.1, Egl173160.1, Egl173360.1, Egl173390.1, Egl173460.1	Citropsis061620.1, Citropsis219160.1, Citropsis219210.1, Citropsis219410.1, Citropsis219420.1, Citropsis219430.1, Citropsis219450.1, Citropsis219460.1, Citropsis219470.1, Citropsis219480.1, Citropsis219490.1, Citropsis219720.1, Citropsis219780.1	CP1g002047.t1, CP1g002048.t1, CP1g002051.t1, CP1g002052.t1, CP1g002072.t1, CP1g002074.t1, CP1g002095.t1, CP1g002099.t1, CP1g002137.t1, CP1g002140.t1, CP7g003018.t1	Ciclev10025239m.1, Ciclev10025241m.1, Ciclev10025305m.1, Ciclev10025322m.1, Ciclev10025323m.1, Ciclev10025841m.1, Ciclev10026860m.1, Ciclev10026961m.1, Ciclev10027014m.1, Ciclev10027487m.1, Ciclev10033697m.1	Fh1g12400.1, Fh1g12430.1, Fh1g12790.1, Fh1g13020.1, Fh1g13030.1, Fh1g13180.1, Fh1g13390.1, Fh1g13460.1, Fh7g03570.1, FhUn07090.1	Chh163480.1	Abu1g_000320.1, Abu1g_012680.1, Abu1g_013000.1, Abu1g_013050.1, Abu1g_013210.1, Abu1g_013260.1, Abu1g_013500.1, Abu7g_003760.1	HP137310.1	Cg1g014420.1, Cg1g014440.1, Cg1g014750.1, Cg1g014930.1, Cg1g014940.1, Cg1g015180.1, Cg1g015280.1, Cg7g004350.1		JLX037680.1, JLX038140.1, JLX065960.1, JLX066190.1, JLX067000.1, JLX140270.1, JLX160840.1	LW174670.1, LW218990.1, LW219060.1, LW219390.1, LW219420.1, LW219640.1, LW219650.1, LW219860.1, LW219900.1, LW219910.1, LW219980.1	Cms051590.1, Cms051600.1, Cms051720.1, Cms051740.1, Cms052040.1, Cms091070.1, Cms168820.1, Cms168830.1, Cms169030.1, Cms169050.1, Cms169120.1, Cms188600.1	Cm025550.1, Cm025600.1, Cm025960.1, Cm192840.1, Cm192850.1, Cm193090.1, Cm193190.1, Cm209270.1	Cs_ont_1g015940.1, Cs_ont_1g016040.1, Cs_ont_1g016270.1, Cs_ont_1g016290.1, Cs_ont_1g016590.1, Cs_ont_1g016910.1, Cs_ont_1g016960.1, Cs_ont_5g037990.1, Cs_ont_7g003740.1	SYT107730.1, SYT107890.1, SYT107910.1, SYT108230.1, SYT108240.1, SYT108380.1, SYT108400.1, SYT108410.1, SYT108420.1, SYT108430.1	Cic004690.1, Cic004740.1, Cic005050.1, Cic005100.1, Cic005290.1, Cic005480.1, Cic005520.1, Cic005630.1, Cic088680.1, Cic172700.1	Pt4g020380.1, Pt7g009160.1, Pt7g009200.1, Pt7g009360.1, Pt7g009580.1, Pt7g009640.1, Pt7g010170.1, Pt7g010210.1, Pt7g010490.1	H1Y04229.1, H1Y04240.1, H1Y04241.1, H1Y04245.1, H1Y04246.1, H1Y04268.1, H1Y04270.1, H1Y04301.1, H1Y04302.1, H1Y04304.1, H1Y04315.1, H1Y04354.1, H1Y04358.1, H1Y25045.1, H1Y28696.1, H1Y30381.1	H2Y03832.1, H2Y03846.1, H2Y03871.1, H2Y03873.1, H2Y03941.1, H2Y03978.1, H2Y03986.1, H2Y24783.1, H2Y28485.1, H2Y30154.1
OG0012722		OG0000082			Citropsis004050.1, Citropsis004070.1, Citropsis004080.1, Citropsis041200.1, Citropsis079790.1, Citropsis115210.1, Citropsis115230.1, Citropsis210230.1, Citropsis210250.1, Citropsis210270.1, Citropsis231270.1, Citropsis241720.1, Citropsis273350.1, Citropsis273390.1, Citropsis273400.1, Citropsis273460.1, Citropsis273470.1, Citropsis273490.1, Citropsis273500.1	CP2g000002.t1, CP2g000003.t1, CP2g000004.t1, CP2g000005.t1, CP2g000007.t1, CP2g000009.t1, CP2g000011.t1, CP2g000012.t1, CP2g000013.t1, CP2g000014.t1, CP2g000016.t1, CP2g000018.t1, CP2g000020.t1, CP2g004266.t1, CP2g004267.t1, CP4g000001.t1, CP4g000002.t1, CP5g000002.t1, CP5g005815.t1, CP6g000002.t1, CP7g000002.t1, CP7g000003.t1, CP7g000005.t1, CP9g000001.t1	Ciclev10003007m.1	Fh1g00010.1, Fh8g00010.1, FhUn14600.1	Chh062010.1, Chh097510.1, Chh140520.1, Chh140530.1, Chh140550.1, Chh148260.1, Chh148270.1			Cg2g046950.1, Cg5g012800.1	Cmt055350.1, Cmt055370.1, Cmt106100.1, Cmt106120.1, Cmt158910.1, Cmt158920.1, Cmt218390.1, Cmt245910.1, Cmt245940.1, Cmt245960.1, Cmt246080.1, Cmt246110.1, Cmt246140.1		LW022170.1, LW022190.1, LW053820.1, LW053830.1, LW053860.1, LW132810.1, LW132830.1, LW132840.1, LW132860.1, LW132870.1, LW172070.1, LW184380.1, LW216680.1, LW216700.1, LW277340.1, LW277380.1, LW277410.1	Cms018150.1, Cms018220.1, Cms018230.1, Cms019030.1, Cms019050.1, Cms019060.1, Cms019080.1, Cms040770.1, Cms192160.1, Cms192170.1, Cms192180.1, Cms238330.1, Cms238340.1	Cm031910.1, Cm031950.1, Cm174770.1, Cm174800.1, Cm183490.1, Cm183500.1, Cm183530.1, Cm208870.1, Cm215840.1, Cm230580.1, Cm230590.1, Cm230620.1, Cm238270.1, Cm238300.1, Cm238330.1, Cm238340.1, Cm251780.1, Cm251790.1, Cm262500.1, Cm262510.1, Cm263610.1, Cm296270.1, Cm300460.1, Cm312990.1	Cs_ont_2g000020.1, Cs_ont_3g000080.1, Cs_ont_3g033340.1, Cs_ont_3g033360.1, Cs_ont_3g033370.1, Cs_ont_3g033390.1, Cs_ont_3g033400.1, Cs_ont_5g050840.1, Cs_ont_6g000010.1, Cs_ont_8g029510.1, Cs_ont_8g029530.1, Cs_ont_Un004860.1		Cic029680.1, Cic260220.1	Pt3g004260.1, Pt7g001070.1, Pt7g001180.1, Pt7g001190.1, PtUn032760.1, PtUn032770.1, PtUn036650.1, PtUn036660.1, PtUn036670.1, PtUn036680.1	H1Y00029.1, H1Y00166.1, H1Y00605.1, H1Y00606.1, H1Y01472.1, H1Y01475.1, H1Y05899.1, H1Y05902.1, H1Y05904.1, H1Y05905.1, H1Y05906.1, H1Y05909.1, H1Y15754.1, H1Y15757.1, H1Y26489.1, H1Y26491.1, H1Y37765.1, H1Y37770.1, H1Y37773.1	H2Y01053.1, H2Y01549.1, H2Y05480.1, H2Y15206.1, H2Y15207.1, H2Y15208.1, H2Y15211.1, H2Y15212.1, H2Y15213.1, H2Y15214.1, H2Y15215.1, H2Y29757.1
OG0012723		OG0000083	Aeg006080.1, Aeg233060.1, Aeg233070.1, Aeg233080.1	Egl023500.1, Egl037060.1, Egl229720.1, Egl229760.1, Egl229810.1, Egl229880.1	Citropsis010690.1, Citropsis204010.1	CP3g003558.t1, CP3g003559.t1, CP3g003561.t1, CP3g003572.t1, CP3g003574.t1, CP9g001391.t1, CP9g001398.t1, CP9g001401.t1, CP9g001424.t1, CP9g001426.t1, CP9g001429.t1, CP9g001431.t1, CP9g001434.t1, CP9g001438.t1	Ciclev10002065m.1, Ciclev10002547m.1, Ciclev10003100m.1, Ciclev10003370m.1, Ciclev10003607m.1, Ciclev10003813m.1, Ciclev10005617m.1, Ciclev10005646m.1, Ciclev10005647m.1, Ciclev10005650m.1, Ciclev10005659m.1, Ciclev10005661m.1, Ciclev10006558m.1, Ciclev10006729m.1, Ciclev10006747m.1	Fh3g10420.1, Fh3g10440.1, Fh9g12920.1, Fh9g12940.1, Fh9g12960.1, Fh9g12990.1, Fh9g13020.1, Fh9g13030.1, Fh9g13050.1, Fh9g13070.1	Chh104160.1, Chh135320.1, Chh135340.1, Chh136110.1, Chh136130.1, Chh136170.1, Chh136280.1, Chh136290.1, Chh136320.1, Chh191160.1, Chh191170.1, Chh191190.1	Abu9g_012110.1, Abu9g_012150.1	HP152330.1	Cg3g002350.1, Cg8g009660.1, Cg9g011770.1, Cg9g011800.1, Cg9g011810.1, Cg9g012840.1, Cg9g012870.1, Cg9g012890.1, CgUng009660.1		JLX034940.1, JLX035720.1, JLX094080.1, JLX094530.1	LW073540.1, LW073610.1, LW073620.1, LW134740.1, LW134860.1, LW134890.1, LW314240.1, LW314800.1, LW314820.1, LW314830.1, LW314860.1, LW314890.1, LW314990.1, LW315030.1	Cms072610.1, Cms152010.1, Cms152030.1, Cms152050.1, Cms152060.1, Cms152100.1, Cms152110.1, Cms152120.1	Cm063620.1, Cm063650.1, Cm109360.1, Cm109380.1, Cm109440.1, Cm109450.1, Cm113330.1, Cm113340.1, Cm158130.1, Cm256520.1, Cm256530.1, Cm256540.1, Cm263260.1, Cm263270.1, Cm277050.1, Cm298210.1	Cs_ont_3g028100.1	SYT001750.1, SYT001770.1, SYT001780.1, SYT001790.1, SYT001800.1, SYT001820.1, SYT043240.1, SYT043250.1, SYT043260.1, SYT045140.1, SYT131860.1, SYT131870.1, SYT132010.1, SYT132080.1, SYT132090.1, SYT181120.1, SYT203080.1, SYT219670.1, SYT219690.1	Cic066620.1, Cic240940.1, Cic240960.1, Cic240970.1, Cic240990.1, Cic241050.1, Cic241060.1	Pt3g000200.1, Pt3g000220.1, Pt9g010730.1, Pt9g010740.1, Pt9g010750.1, Pt9g010780.1, Pt9g010800.1, Pt9g010830.1, Pt9g010860.1, Pt9g010880.1	H1Y14663.1, H1Y14714.1, H1Y14728.1, H1Y39576.1, H1Y39577.1, H1Y39584.1, H1Y39605.1, H1Y39606.1, H1Y39610.1, H1Y39615.1, H1Y39617.1, H1Y39625.1	H2Y14213.1, H2Y14222.1, H2Y39515.1, H2Y39516.1, H2Y39523.1, H2Y39550.1, H2Y39553.1, H2Y39557.1, H2Y39562.1, H2Y39564.1, H2Y39567.1
OG0012724		OG0000084	Aeg071910.1, Aeg071950.1, Aeg071960.1, Aeg071980.1, Aeg073680.1		Citropsis025410.1, Citropsis108960.1, Citropsis136050.1, Citropsis136090.1, Citropsis137920.1, Citropsis138160.1	CP5g002517.t1, CP7g001430.t1, CP7g001431.t1, CP7g001432.t1, CP7g001434.t1, CP7g001437.t1, CP7g001438.t1, CP7g001442.t1, CP7g001447.t1, CP7g001451.t1, CP7g001452.t1, CP7g001454.t1, CP7g001455.t1, CP7g001461.t1, CP7g001756.t1	Ciclev10023601m.1, Ciclev10033346m.1, Ciclev10033436m.1, Ciclev10033459m.1, Ciclev10033526m.1, Ciclev10033536m.1, Ciclev10033541m.1, Ciclev10033719m.1, Ciclev10033744m.1, Ciclev10033879m.1, Ciclev10033957m.1	Fh5g27770.1, Fh7g15250.1, Fh7g15590.1, Fh7g15610.1, Fh7g15650.1, Fh7g15700.1, Fh7g18460.1, Fh7g18510.1, Fh7g18530.1, Fh7g18540.1, Fh7g18590.1, Fh7g18600.1, Fh7g18610.1, Fh7g18630.1	Chh049570.1, Chh049590.1, Chh125590.1, Chh125630.1, Chh127760.1, Chh128060.1	Abu5g_021740.1, Abu7g_012200.1, Abu7g_012470.1, Abu7g_012510.1, Abu7g_012520.1, Abu7g_014220.1, Abu7g_014260.1	HP221720.1, HP221760.1, HP221780.1, HP221800.1, HP223420.1, HP223950.1, HP277240.1	Cg5g023370.1, Cg5g023390.1, Cg6g008500.1, Cg6g008550.1, Cg7g011600.1, Cg7g011610.1, Cg7g011930.1	Cmt012770.1, Cmt014360.1, Cmt014410.1, Cmt014450.1, Cmt014460.1, Cmt014470.1, Cmt014480.1, Cmt080010.1	JLX079450.1, JLX079750.1, JLX080300.1, JLX081700.1	LW109310.1, LW109320.1, LW168750.1, LW168770.1, LW168800.1, LW168850.1, LW170890.1, LW171220.1	Cms065070.1, Cms065080.1, Cms065090.1, Cms134350.1, Cms214820.1, Cms276930.1, Cms276980.1	Cm072290.1, Cm072330.1, Cm072350.1, Cm180490.1, Cm180520.1, Cm180540.1, Cm209620.1, Cm209630.1, Cm209640.1, Cm244670.1, Cm244680.1, Cm298050.1, Cm304440.1		SYT027730.1, SYT027770.1, SYT042600.1, SYT042610.1, SYT146620.1, SYT146630.1	Cic046810.1, Cic177830.1, Cic179600.1, Cic179610.1, Cic246830.1, Cic248590.1, Cic248640.1, Cic248650.1	Pt3g021700.1, Pt4g011610.1, Pt4g011620.1, Pt4g011640.1, Pt4g011650.1, Pt4g011710.1, Pt4g013570.1, Pt4g013600.1, Pt4g013620.1	H1Y01264.1, H1Y22497.1, H1Y32036.1, H1Y32068.1, H1Y32360.1, H1Y32370.1, H1Y32373.1, H1Y32376.1, H1Y32380.1, H1Y32383.1, H1Y32388.1, H1Y32391.1, H1Y32395.1, H1Y32398.1, H1Y32401.1	H2Y22347.1, H2Y22348.1, H2Y31719.1, H2Y31998.1, H2Y32003.1, H2Y32006.1, H2Y32008.1, H2Y32012.1, H2Y32015.1, H2Y32020.1, H2Y32025.1, H2Y32028.1, H2Y32034.1, H2Y32037.1, H2Y32040.1, H2Y32043.1, H2Y32049.1, H2Y32052.1, H2Y32058.1, H2Y32061.1, H2Y32063.1
[truncated: 35,578 more rows]

## Sheet: S3
Supplementary file S3. List of orthogroup IDs identified for key KEGG pathways.
map00900: terpenoid biosynthesis	map00906: carotenoid biosynthesis	map00940: phenylpropanoid biosynthesis	map00941: flavonoid biosynthesis	map04626: plant-pathogen interaction
OG0000057	OG0000002	OG0000012	OG0000035	OG0000006
OG0000089	OG0000035	OG0000035	OG0000044	OG0000009
OG0000114	OG0000044	OG0000044	OG0000052	OG0000011
OG0000166	OG0000062	OG0000052	OG0000053	OG0000013
OG0000171	OG0000066	OG0000053	OG0000062	OG0000015
OG0000196	OG0000095	OG0000062	OG0000066	OG0000018
OG0000231	OG0000127	OG0000066	OG0000092	OG0000019
OG0000246	OG0000134	OG0000092	OG0000095	OG0000020
OG0000248	OG0000141	OG0000095	OG0000111	OG0000021
OG0000277	OG0000158	OG0000127	OG0000114	OG0000025
OG0000309	OG0000178	OG0000134	OG0000127	OG0000026
OG0000312	OG0000190	OG0000141	OG0000134	OG0000027
OG0000398	OG0000196	OG0000158	OG0000141	OG0000028
OG0000473	OG0000210	OG0000174	OG0000158	OG0000031
OG0000504	OG0000211	OG0000178	OG0000178	OG0000032
OG0000577	OG0000216	OG0000190	OG0000190	OG0000033
OG0000649	OG0000223	OG0000199	OG0000205	OG0000034
OG0000666	OG0000226	OG0000210	OG0000210	OG0000038
OG0000726	OG0000231	OG0000211	OG0000211	OG0000042
OG0000753	OG0000237	OG0000216	OG0000216	OG0000046
OG0000758	OG0000246	OG0000223	OG0000223	OG0000049
OG0000802	OG0000262	OG0000226	OG0000226	OG0000050
OG0000820	OG0000318	OG0000237	OG0000235	OG0000056
OG0000923	OG0000322	OG0000247	OG0000237	OG0000063
OG0000929	OG0000324	OG0000262	OG0000262	OG0000067
OG0000933	OG0000336	OG0000278	OG0000275	OG0000074
OG0000946	OG0000384	OG0000312	OG0000307	OG0000075
[truncated: 1,778 more rows]

## Sheet: S4
Supplementary file S4. List of species-specific gene in HY1 and HY2. The outputs were generated using Orthofinder.
[truncated: 262 more rows]

[truncated: 3 more sheets: S5, S6, S7]
